# Supplementary material for: Cancer Incidence, Mortality, Years of Life Lost, Years Lived With Disability, and Disability-Adjusted Life Years for 29 Cancer Groups From 2010 to 2019: A Systematic Analysis for the Global Burden of Disease Study 2019
Source: PubMed Central journal article supplement (PMC8719276; doi:10.1001/jamaoncol.2021.6987), 2021-12-30
Supplement: jamaoncol-e216987-s001.pdf [file jamaoncol-e216987-s001.pdf]

## Supplemental Online Content

Kocarnik JM, Compton K, Dean FE, et al; Global Burden of Disease 2019 Cancer Collaboration. Cancer incidence, mortality, years of life lost, years lived with disability, and disability-adjusted life years for 29 cancer groups from 2010 to 2019: a systematic analysis for the Global Burden of Disease Study 2019. *JAMA Oncol*. Published online December 30, 2021. doi:10.1001/jamaoncol.2021.6987

### eAppendix.

- eTable 1.** Number of site-years for cancer mortality data by source type, for GBD 2019 compared to GBD 2017
- eTable 2.** Socio-demographic Index groupings by geography, based on 2019 values
- eTable 3.** List of International Classification of Diseases (ICD) codes mapped to the Global Burden of Disease cause list for cancer incidence data
- eTable 4.** List of International Classification of Diseases (ICD) codes mapped to the Global Burden of Disease cause list for cancer mortality data
- eTable 5.** Undefined cancer code categories (ICD-10) and respective target codes for cancer registry incidence data
- eTable 6.** Cancer registry sources for cancer incidence and mortality-to-incidence ratio data by country, year, and registry
- eTable 7.** Covariates selected for CODEm for each GBD cancer group and expected direction of covariate
- eTable 8.** Comparison of GBD 2017 and GBD 2019 covariates used and level of covariates
- eTable 9.** Results for CODEm model performance testing
- eTable 10.** Percent change before and after CoDCorrect by cancer for all ages, both sexes combined, 2019
- eTable 11.** Duration of four prevalence phases by cancer
- eTable 12.** Disability weights
- eTable 13.** GATHER5 guidelines checklist
- eTable 14.** Contribution of YLDs and YLLs to DALYs by cancer, global, both sexes, 2019
- eTable 15.** Global number of incidence, prevalence, YLDs, deaths, YLLs, DALYs for both sexes, 2010 and 2019 for all level 2 GBD causes
- eTable 16.** Trends in incidence globally, and by SDI quintile, both sexes, 2010 to 2019
- eTable 17.** Trends in mortality globally, and by SDI quintile, both sexes, 2010 to 2019
- eTable 18.** Global age-standardized cancer estimates in 2019 and ranking among 22 level 2 categories of diseases and injuries in the Global Burden of Disease Study, overall and by quintile of socio-demographic index
- eFigure 1.** Socio-demographic index quintiles for the Global Burden of Disease Study 2019
- eFigure 2.** Flowchart GBD cancer mortality, YLL estimation
- eFigure 3.** Flowchart GBD cancer incidence, prevalence, YLD estimation
- eFigure 4.** Contribution of YLDs and YLLs to DALYs by cancer, global, both sexes, 2019
- eFigure 5.** Top-ranked cancers by absolute number of incident cases for all ages in males, 2019
- eFigure 6.** Top-ranked cancers by absolute number of deaths for all ages in males, 2019
- eFigure 7.** Top-ranked cancers by absolute number of incident cases for all ages in females, 2019
- eFigure 8.** Top-ranked cancers by absolute number of deaths for all ages in females, 2019
- eFigure 9.** Cancers ranked by disability-adjusted life years (DALYs) for males between 2010 and 2019
- eFigure 10.** Cancers ranked by disability-adjusted life years (DALYs) for females between 2010 and 2019
- eFigure 11.** Ranking of 29 cancer groups by mortality in 2019, by country and location group
- eFigure 12.** Ranking of 29 cancer groups by incidence in 2019, by country and location group
- eFigure 13.** Age-standardized rates and annualized rate of change for age-standardized rates for total cancers excluding non-melanoma skin cancer, all ages, both sexes
- eFigure 14.** Global counts of cancer-specific incidence and deaths in 2019, overall and by sex
- eFigure 15.** Global age-standardized cancer-specific incidence and mortality rates in 2019, overall and by sex

This supplemental material has been provided by the authors to give readers additional information about their work.

## eAppendix.

Updates to this appendix were only made if methods were updated for GBD 2019; other parts remain the same as in the appendix to the GBD 2017 manuscript “Global Burden of Disease Cancer Collaboration. Global, Regional, and National Cancer Incidence, Mortality, Years of Life Lost, Years Lived With Disability, and Disability-Adjusted Life-Years for 29 Cancer Groups, 1990 to 2017: A Systematic Analysis for the Global Burden of Disease Study. *JAMA Oncol.* 2019;5(12):1749–1768. doi:10.1001/jamaoncol.2019.2996.”<sup>1</sup> Certain parts of this appendix were published in appendices of other GBD 2019 publications and are cited when used.<sup>2–4</sup>

## Additional method summaries for all GBD malignant neoplasms except for NMSC

### Cancers in the GBD Cause Hierarchy

The Global Burden of Disease (GBD) cause list is organized in a hierarchy. Levels 1 and 2 represent general groupings of causes, while levels 3 and 4 represent increasingly specific causes. The general Level 1 group “Non-communicable diseases” includes the broad Level 2 group “Neoplasms,” which includes all malignant and benign neoplasms. Level 3 includes 30 cancer groups, and Level 4 includes 42 groups since the Level 3 parent causes “Leukemia”, “Liver cancer”, “Non-melanoma skin cancer”, and “Other neoplasms” are further subdivided into Level 4 subtypes. In this publication, estimates for the GBD cancer groups are presented as totals combined across age groups, sexes, and locations for the time period from 2010 to 2019. More specific results are available via the GBD 2019 Results Tool (<http://ghdx.healthdata.org/gbd-results-tool>), which provides estimates for each of the 5-year GBD age groups (0-5; 5-9; etc. until 95+, plus more granular reporting in ages under 5 years), for each year 1990 to 2019, by sex, and in 204 countries or territories. All *International Classification of Disease*<sup>6</sup> (ICD) codes pertaining to cancer from ICD-9 (codes 140-209) and ICD-10 (codes C00-C96) are included in the estimates for “malignant neoplasms,” except for Kaposi sarcoma (ICD-9: 176, ICD-10: C46). Kaposi sarcoma deaths are primarily redistributed to HIV/AIDS according to age (100% for ages 0-15 years, 95% for 15-50 years, and 90% for ≥50 years), with the remaining deaths assigned to “other malignant neoplasms”.<sup>2</sup> All ICD-9 and ICD-10 codes pertaining to neoplasms (ICD-9 140-239, ICD-10 C00-D49) are included in the estimates for “Neoplasms.” eTable 4 and eTable list all ICD codes and their respective GBD causes.

Benign neoplasms are accounted for in the Level 3 GBD cause “Other neoplasms,” (Level 3; ICD-9 codes 210-239, ICD-10 codes D00-D49), which is further subdivided into the Level 4 causes “Myelodysplastic, myeloproliferative, and other hematopoietic neoplasms,” “Benign and in situ cervical and uterine neoplasms,” “Benign and in situ intestinal neoplasms,” and “Other benign and in situ neoplasms.”

An important change from the GBD 2017 cancer cause hierarchy is that in GBD 2017, the Level 3 cause “Other neoplasms” and its underlying Level 4 causes were not counted in the total incidence for the Level 2 “Neoplasms” cause; this is no longer the case in the GBD 2019 analysis. In this current iteration of GBD results reporting (GBD 2019), incidence, prevalence, mortality, years lived with disability (YLDs), years of life lost (YLLs), and disability-adjusted life years (DALYs) estimates for total neoplasms are true aggregates of all underlying causes, including Level 3 “Other neoplasms.” For convenience to those primarily interested in estimates for malignant neoplasms, the GBD 2019 Results Tool (<http://ghdx.healthdata.org/gbd-results-tool>) now also includes a new custom Level 2 cancer grouping, “D. Total Cancers.” This “Total Cancers” grouping provides estimates for the subset of the total neoplasms that exclude benign and in situ neoplasms. Of note, this manuscript focuses on reporting results for “Total Cancers”, not “Neoplasms”, but estimates for “Neoplasms” are available via the GBD 2019 Results Tool as well.

### Data sources

The GBD cause of death (CoD) database contains cancer mortality data originating from multiple sources, including vital registration (VR), verbal autopsy (VA), and cancer registry (CR) data. The cancer registry mortality estimates that are uploaded into the CoD database stem from cancer registry

incidence data that have been transformed to mortality estimates through the use of mortality-to-incidence ratios (MIRs).

A summary of cancer-, location-, and year-specific data sources used for GBD 2019 can be found in eTable 3. These included 767,514 sources from vital registration systems (111,084 new for GBD 2019), 155,542 sources from cancer registries (25,901 new for GBD 2019), and 6,137 sources from verbal autopsy reports.

#### Cancer registry data sources

Cancer incidence and mortality data were sought from individual cancer registries, such as the Surveillance, Epidemiology, and End Results (SEER) Program<sup>7</sup>; provided by collaborators; or downloaded from aggregated databases of cancer registry data such as “Cancer Incidence In Five Continents” (CI5),<sup>8–18</sup> EUREG,<sup>19</sup> or NORDCAN.<sup>20</sup> Only population-based cancer registries were included, with inclusion criteria that they included all cancers (i.e. were not specialty registries), reported data for all age groups (except for pediatric cancer registries), and reported data for both sexes. Pathology-based cancer registries were included if they had a defined population. Hospital-based cancer registries were excluded. Redundant cancer registry data were excluded from either the final incidence data input or the MIR model input if a more detailed source (e.g., providing more detailed age or diagnostic groups) was available for the same population. Preference was given to registries with national coverage over those with only local coverage, except those from countries where the GBD study provides subnational estimates. Data were excluded if the coverage population was unknown, except for in high SDI quintile locations with full geographic coverage where the GBD population could be substituted.

A list of the cancer registries included in our analysis and the years covered can be found in eTable . We used all data from GBD 2017 and added registry data from Argentina, Australia, Austria, Bermuda, Canada, Chile, China, Colombia, Germany, Netherlands, Switzerland, United Kingdom, Uruguay, and Yemen. Additional metadata for each source are available in the online GBD citation tool, <http://ghdx.healthdata.org/gbd-2019>.

#### Mortality-to-incidence ratio data sources

Most cancer registries only report cancer incidence. However, if a cancer registry also reported cancer mortality, mortality data were also extracted. CR sources with matching incidence and mortality data were used in the mortality to incidence ratio estimation. eTable 2 lists the registries used for the estimation of mortality-to-incidence ratios.

#### Cancer mortality data in the cause of death database other than cancer registry data

In addition to cancer registry data, the GBD cause of death (CoD) database also contains cancer mortality data originating from multiple sources, including vital registration (VR) and verbal autopsy (VA) data. In countries without VR systems, VA studies are a viable data source to inform CoD. VA data are obtained by trained interviewers who use a standardised questionnaire to ask relatives about the signs, symptoms, and demographic characteristics of recently deceased family members. CoD is assigned based on the answers to the questionnaires. A detailed description of the data sources and processing steps for the cause of death database can be found in the appendix to the GBD 2019 paper “Global burden of 369 diseases and injuries in 204 countries and territories, 1990–2019: a systematic analysis for the Global Burden of Disease Study 2019,” as well as in the online GBD citation tool <http://ghdx.healthdata.org/gbd-2019>.<sup>2</sup>



## Bias of categories of input data

Potential biases of the input data included for the CoD database can also be found in the appendix to the GBD 2019 paper “Global burden of 369 diseases and injuries in 204 countries and territories, 1990–2019: a systematic analysis for the Global Burden of Disease Study 2019.”<sup>2</sup> Cancer registry data can be biased in multiple ways. A high proportion of ill-defined cancer cases in the cancer registry data requires redistribution of these cases to other cancers, which introduces a potential for bias. Changes between coding systems can lead to artificial differences in disease estimates; however, we adjust for this bias by mapping the different coding systems to GBD cancer causes. Underreporting of cancers that require advanced diagnostic techniques (e.g., leukemia, brain, pancreatic, and liver cancer) can be an issue in cancer registries from low-income countries. On the other hand, misclassification of metastatic sites as primary cancer can lead to overestimation of cancer sites that are common sites for metastases (e.g., brain or liver cancer). Since many cancer registries are located in urban areas, the representativeness of the registry for the general non-urban population can also be problematic. The accuracy of mortality data reported in cancer registries usually depends on the quality of the vital registration system. If the vital registration system is incomplete or of poor quality, the mortality-to-incidence ratio can be biased to lower ratios.

## Data analysis

Flowcharts describing the conceptual overview of the processing of cancer data are available in eFigure 1 and eFigure 2.

## Cancer registry data processing

Cancer registry data goes through multiple processing steps before entering the CoD database.

**1. Formatting incidence and mortality data.** First, the original data are transformed into standardized files, which included standardization of format, categorization, and registry names (#1 in eFigure 1).

**2. Subtotal recalculation.** Some cancer registries report individual codes as well as aggregated totals. An example of this would be where the registry data reports C18, C19, and C20 individually, and also the aggregated group of C18–C20 (colon and rectum cancer). The data processing step, “subtotal recalculation” (#2 in eFigure 1), verifies these totals and subtracts the values of any individual codes from the aggregates.

**3. Mapping data to GBD causes.** In the third step (#3 in eFigure 1), cancer registry incidence data and cancer registry mortality data are mapped to GBD causes. A different map is used for incidence and for mortality data because of the assumption that there are no deaths for certain cancers. One example is basal cell carcinoma of the skin. In the cancer registry incidence data, basal cell carcinoma is mapped to non-melanoma skin cancer (basal cell carcinoma). However, if basal cell skin cancer is recorded in the cancer registry mortality data, the deaths are instead mapped to non-melanoma skin cancer (squamous cell carcinoma) under the assumption that they were actually misclassified squamous cell skin cancers. Another example is benign or in situ neoplasms. Because cancer registries do not collect non-malignant neoplasms in a standardized way, any benign or in situ neoplasms reported in a cancer registry incidence dataset are dropped from that dataset. The same neoplasms reported in a cancer registry mortality dataset are instead mapped to the respective invasive cancer. For example, cases of “ductal carcinoma in situ” in a cancer registry incidence dataset are dropped from the dataset, while deaths

from “ductal carcinoma in situ” in a cancer registry mortality dataset are mapped to breast cancer. Maps of ICD- codes to GBD causes for incidence and mortality data can be found in eTable 4 and eTable 5.

**4. Age/sex splitting.** In the fourth data processing step (#4 in in eFigure 1), cancer registry data are standardized to the GBD age groups. The GBD age groups reported in the GBD 2019 study include four age categories under 5 years of age: early neonatal (0-6 days), late neonatal (7-27 days), post-neonatal (28-364 days), and 1-4 years. These are followed by 19 adolescent and adult age categories binned by five years: 5-9 years, 10-14 years, etc., up to the terminal age group of 95 years and older. For each cancer, the minimum age group estimated was determined as the youngest age-group where SEER reported at least 50 cases over the period 1990 to 2015.<sup>7</sup> The modeled starting and ending age groups for each cancer are reported in eTable 7 and 8. Reference global age-specific incidence rates were generated using hospital inpatient data as described in Section 4.3 of the appendix to the GBD 2019 paper “Global burden of 369 diseases and injuries in 204 countries and territories, 1990–2019: a systematic analysis for the Global Burden of Disease Study 2019.”<sup>2</sup> Reference age-specific mortality rates were generated using aggregated deaths from processed VR data, using the approach described in Section 2.5 of the appendix to the aforementioned GBD 2019 paper.

For incidence or mortality datasets that require age-splitting, age-specific proportions are then generated by applying the reference age-specific rates to the registry population to produce the expected number of cases (or deaths for a mortality dataset) for that registry by age. The expected number of cases (or deaths) for each sex, age, and cancer were normalized to 1, creating final, age-specific proportions. These proportions were then applied to the total number of cases (or deaths) by sex and cancer to get the GBD age group-specific number of cases (or deaths) related to that dataset.

In the rare case that the cancer registry only contains data for both sexes combined, the age-specific cases or deaths are split and reassigned to separate sexes using the same weights that are used for the age-splitting process. Starting from the expected number of deaths, global proportions are generated by sex for each age. For example, if for ages 15-19 years old there are 6 expected deaths for males from cause of death data and 4 expected deaths for females, then 60% of the combined-sex deaths for ages 15-19 years would be assigned to males and the remaining 40% would be assigned to females.

**5. Cause disaggregation.** In the fifth step (#5 in eFigure 1), data for cause entries that are aggregates of GBD causes were redistributed across those GBD causes. Examples of these aggregated causes include some cancer registries reporting ICD-10 codes C00-C14 together as “lip, oral cavity, and pharyngeal cancer.” These groups are broken down into subcauses that can be individually mapped to single GBD causes. In this example, the more specific ICD-10 codes within C00-C14 are “lip and oral cavity cancer” (C00-C08), “nasopharynx cancer” (C11), “cancer of other parts of the pharynx” (C09-C10, C12-C13), and “Malignant neoplasm of other and ill-defined sites in the lip, oral cavity, and pharynx” (C14). To redistribute the data, weights were created using the same “rate-applied-to-population” method employed in age-sex splitting (see step four above). For the undefined code (C14 in the example) an “average all cancer” weight was used, calculated on the high-quality cancer registry data from SEER/NORDCAN/CI5 by dividing the sum of the cases across these registries by the combined population across these registries. Then, proportions were generated by subcause for each aggregate cause as in the sex-splitting example above (see step four). The total number of cases from the aggregated group

(C00-C14) was recalculated for each subgroup and the undefined code (C14). C14 was then redistributed as a “garbage code” in step six. For two exceptions, C44 (non-melanoma skin cancer) and C46 (Kaposi’s sarcoma), fixed proportions were used to redistribute into GBD causes. Non-melanoma skin cancer processing is described under section “Input data and methodological summary for non-melanoma skin cancer (squamous-cell carcinoma).” C46 entries were primarily redistributed to HIV according to age (100% for age <15 years, 95% for age 15-49 years, and 90% for age ≥50 years), with the remainder redistributed to the GBD cancer cause “Other malignant neoplasms.”

**6. Redistribution.** In the sixth step (#6 in in eFigure 1), unspecified ICD codes (“garbage codes”) such as “ill-defined cancer site” (for example, C76 or C80) are redistributed across relevant causes estimated within the GBD hierarchy. Redistribution of cancer registry incidence and mortality data mirrored the process of the redistribution used in the cause of death database and utilized the same redistribution maps as specified in Section 2.4 of the appendix to the GBD 2019 Diseases and Injuries capstone, “Global burden of 369 diseases and injuries in 204 countries and territories, 1990–2019: a systematic analysis for the Global Burden of Disease Study 2019”.<sup>2</sup> Sources and targets of garbage codes can be found in eTable 6.

**7. Removal of duplicates.** In the seventh step (#7 in in eFigure 1), duplicate or redundant data sources were removed from the processed cancer registry dataset. Duplicate sources were present if, for example, a cancer registry was part of the CI5 database but we also had data from that registry directly. Redundancies occurred and were removed as described in “Cancer Incidence Data Sources,” where more detailed data were available, or when national registry data could replace regionally representative data. From here, two parallel selection processes were run; one to generate input data for the mortality-to-incidence ratio (MIR) models, and one to generate incidence for final mortality estimation. When creating the final incidence input, higher priority was given to registry data from the most standardized source; whereas for the MIR model input, only sources that reported both incidence and mortality were used.

**8. Combine matching incidence and mortality data and model MIRs.** In the eighth step (#8 in in eFigure 1), the processed incidence and mortality data from cancer registries were matched by cancer cause, age, sex, year, and location to generate MIRs (eTable 6). The resulting MIRs were used as input for a three-step modeling approach using the general GBD spatiotemporal Gaussian process regression (ST-GPR)<sup>3</sup> approach, with the Healthcare Access and Quality (HAQ) Index as a covariate in the linear mixed effects model using logit-transformed MIR as the outcome.<sup>21</sup>

$$\text{logit} (MIR_{c,a,s,t}) = \alpha + \beta_1 HAQIndex_{c,t} + \sum_a^A \beta_2 I_a + \beta_3 I_s + \epsilon_{c,a,s,t}$$

MIR: mortality-to-incidence ratio

c: country (or subnational for subnationally modeled locations), a: age group, t: time (years); s: sex

HAQIndex: Healthcare Access and Quality Index

I: indicator variable

$\epsilon_{c,a,s,t}$ : error term

Predictions were made without the random effects. The ST-GPR model has three main hyper-parameters that control for smoothing across time, age, and geography.<sup>2</sup> These hyper-parameters were adjusted for GBD 2019 in order to improve model performance in locations with sparse data. The time adjustment parameter lambda ( $\lambda$ ) aims to borrow strength from neighboring time points (i.e., the value in this year is highly correlated with the value in the previous year but less so further back in time). For GBD 2019, lambda was lowered from 2 to 0.05, increasing the weight of more distant years. The age adjustment parameter omega ( $\omega$ ) borrows strength from data in neighboring age groups and was lowered from 1.0 to 0.5, increasing the weight of more distant age groups. The space adjustment parameter zeta ( $\xi$ ) aims to borrow strength across the hierarchy of geographical locations. Zeta was lowered from 0.95 to 0.01, reducing the weight of more distant geographical data at the region or super region level. For the remaining parameters in the Gaussian process regression, we lowered the amplitude from 2 to 1 (reducing fluctuation from the mean function) and reduced the scale value from 15 to 10 (reducing the time distance over which points are correlated). Compared to GBD 2017 models, these model specification changes generally led to more smoothing of the MI ratio estimates across age and time, and less geographic smoothing at the region or super region level.

Data-cleaning steps for MIR estimation were similar to those for GBD 2017. For each cancer, MIRs from locations in HAQ Index quintiles 1-4 were dropped if they were below the median of MIRs from locations in HAQ Index quintile 5. We also dropped MIRs from locations in HAQ Index quintiles 1-4 if the MIRs were above an outlier threshold calculated as the third quartile + 1.5 \* IQR (inter-quartile range). We dropped all MIR data that were based on fewer than 15 incident cases to avoid excessive variation in the ratio due to small numbers (this threshold was 25 cases in GBD 2017, but was lowered in GBD 2019 in order to include additional data). An exception to this threshold was made for mesothelioma and acute myeloid leukemia, where instead we dropped MIRs that were based on fewer than ten cases because of lower data availability for these two cancers. For the lower end of the age spectrum where cancers are generally rarer, we also aggregated incidence and mortality to the youngest five-year age bin where SEER reported at least 50 cases from 1990 to 2015, to avoid unstable MIR predictions in young age groups because of too few data. The MIR estimates in this SEER-based minimum age-bin were then copied down to all younger GBD age groups estimated for that cancer.

Since MIRs can be above 1, especially in older age groups and cancers with low cure rates, we used the 95th percentile (by age group) of the cleaned dataset (detailed above) to cap the MIR input data. The addition of new data for GBD 2019 led to slightly different upper caps compared to GBD 2017:

| Age group (years) | Maximum MIR, GBD 2017 | Maximum MIR, GBD 2019 |
|-------------------|-----------------------|-----------------------|
| 0 to 4            | 0.56                  | 0.71                  |
| 5 to 9            | 0.71                  | 0.73                  |
| 10 to 14          | 0.84                  | 0.80                  |
| 15 to 19          | 0.86                  | 0.65                  |
| 20 to 24          | 0.65                  | 0.72                  |
| 25 to 29          | 0.59                  | 0.78                  |
| 30 to 34          | 0.63                  | 0.87                  |
| 35 to 39          | 0.73                  | 0.91                  |
| 40 to 44          | 0.83                  | 0.97                  |

|          |      |      |
|----------|------|------|
| 45 to 49 | 0.86 | 0.93 |
| 50 to 54 | 0.89 | 0.93 |
| 55 to 59 | 0.91 | 0.95 |
| 60 to 64 | 0.96 | 0.99 |
| 65 to 69 | 1.01 | 1.03 |
| 70 to 74 | 1.09 | 1.10 |
| 75 to 79 | 1.22 | 1.19 |
| 80 to 84 | 1.36 | 1.27 |
| 85 to 89 | 1.39 | 1.35 |
| 90 to 94 | 1.45 | 1.53 |
| 95+      | 1.87 | 1.84 |

These “upper cap” values were used to allow MIRs over 1 in some age groups but to constrain the MIRs to a maximum level. Any MIR values over this cap were Winsorized to the cap value. To run the logit model, the input data were first divided by the upper caps to get proportional data ranging from 0 to 1. Model predictions from ST-GPR were then rescaled back by multiplying them by the upper caps. To constrain the MIRs at the lower end, we used the fifth percentile of the cancer and age-specific cleaned MIR input data to Winsorize all model predictions below this lower cap.

### 9. Generate mortality estimates from incidence and MIRs

Final estimated MIRs were matched with the cleaned cancer registry incidence dataset finalized in the ninth step (#9 in eFigure 1) to generate mortality estimates (#10 in eFigure 1):

$$MIR_{estimates} * incidence_{registry} = mortality_{CR\ inputs}$$

These mortality estimates are then smoothed by a Bayesian noise-reduction algorithm (to deal with zero counts; this is also applied to the VR and VA data), as specified in Section 2.14 of the appendix to the GBD 2019 paper “Global burden of 369 diseases and injuries in 204 countries and territories, 1990–2019: a systematic analysis for the Global Burden of Disease Study 2019.”<sup>2</sup> These data were uploaded into the CoD database as CR data (#11 in the flowchart). Cancer-specific mortality modelling then followed the general CODEm process using the totality of VA, VR, and CR data.

### Cause of death database formatting

Formatting of data sources for the cause of death (CoD) database, including VR and VA data, is similar to many of the steps outlined above for CR data (#11 in eFigure 1) and is described in Section 2 of the appendix to the GBD 2019 paper “Global burden of 369 diseases and injuries in 204 countries and territories, 1990–2019: a systematic analysis for the Global Burden of Disease Study 2019.”<sup>2</sup>

VA data may not capture cancer deaths as accurately or comprehensively as cancer registries or vital registration systems, but provides a useful contribution to cancer models in locations without VR or CR data. Additional processing and restrictions are performed on VA data to ensure quality standards and feasible inputs. More details on VA data processing are provided in the appendix noted above, particularly Sections 2.2 (VA overview), 2.10 (VA cause restrictions), 2.14 (noise reduction), 2.15 (outlier identification), and 2.16 (data quality ratings).

## CODEm models

Mortality estimates for each cancer were generated using the GBD Cause of Death Ensemble model (CODEm, #12 in eFigure 1) approach, the methods of which have been described in previous publications.<sup>2,22</sup> Additional details are specified in Section 3.1 of the appendix to the GBD 2019 paper “Global burden of 369 diseases and injuries in 204 countries and territories, 1990–2019: a systematic analysis for the Global Burden of Disease Study 2019.”<sup>2</sup>

In brief, the CODEm approach is based on several principles: that all types of available data should be used, even if data quality varies; that a diverse set of plausible models with different combinations of covariates should be evaluated; that both individual models and the overall ensemble models should be tested for their predictive validity; and that the best model or sets of models should be chosen based on the out-of-sample predictive validity.

Covariates are provided for potential use in the ensemble based on a possible predictive relationship between the covariate and the specific cancer mortality, with an expected level and direction of association. Generally, Level 1 covariates have a proven strong relationship with the outcome, such as etiological or biological roles. Level 2 covariates have a strong relationship but not a known direct biological link. Level 3 covariates have a relationship that may be more distal in the causal chain, or are mediated through Level 1 or 2 covariates.<sup>22</sup> The covariates provided to CODEm, as well as their level and direction, differ by cause and sex. The covariates used for 2019 can be found in eTable 7, and differences between GBD 2017 and GBD 2019 covariates can be found in eTable 8.

To generate an ensemble model, CODEm generates submodels that evaluate all plausible relationships between covariates and the response variable. Three additive components of data variance are used in CODEm: sampling variance, non-sampling variance, and garbage code redistribution variance. Model performance of all models is evaluated through out-of-sample predictive validity tests. Ensemble models are constructed from the individual models, with the contribution of individual models to the ensemble weighted by the basis of their predictive validity ranking. The final ensemble contains 1000 draws from these individual component models, from which a mean estimate and a 95% uncertainty interval are calculated. The 95% uncertainty interval represents the 0.025 and 0.975 quantiles of the draws.

## Liver cancer etiology split models

The level 3 cause “liver cancer” is estimated as above, while additional methods are utilized for the underlying level 4 causes. For the level 4 causes of liver cancer, the level 3 total deaths are proportionally split into the five etiology groups included in GBD 2019: 1) Liver cancer due to hepatitis B, 2) Liver cancer due to hepatitis C, 3) Liver cancer due to alcohol, 4) Liver cancer due to nonalcoholic steatohepatitis (NASH), and 5) Liver cancer due to other causes. To find data to inform these proportions, a systematic literature search was performed in PubMed on 10/24/2016 using the following search string:

```
("liver neoplasms"[All Fields] OR "HCC"[All Fields] OR "liver cancer"[All Fields] OR "Carcinoma, Hepatocellular"[Mesh]) AND (("hepatitis B"[All Fields] OR "Hepatitis B"[Mesh] OR "Hepatitis B virus"[Mesh] OR "Hepatitis B Antibodies"[Mesh] OR "Hepatitis B Antigens"[Mesh]) OR ("hepatitis C"[All Fields] OR "Hepatitis C"[Mesh] OR "hepatitis C antibodies"[MESH] OR "Hepatitis C Antigens"[Mesh] OR "Hepacivirus"[Mesh]) OR ("alcohol"[All Fields] OR "Alcohol
```

Drinking"[Mesh] OR "Alcohol-Related Disorders"[Mesh] OR "Alcoholism"[Mesh] OR "Alcohol-Induced Disorders"[Mesh])) NOT (animals[MeSH] NOT humans[MeSH])".

Studies were included if the study population was representative of the liver cancer population for the respective location. Several studies not initially found through this search but that were included in the meta-analysis by de Martel et al, were added.<sup>23</sup> We also included the study by Hong et al, after the authors provided us with additional data on the overlap in etiologies.<sup>24</sup>

For each study, the proportions of liver cancer due to the five specific etiologies were calculated. Cases were considered to be due to NASH when the manuscript explicitly listed the etiology to be NASH or non-alcoholic fatty liver disease (NAFLD). Cases where the etiology was listed as "cryptogenic," "idiopathic," or "unknown" were included within the "other causes" category. In manuscripts where the etiology for a case was not known but major categories could not be ruled out (for example, if the study tested for hepatitis B and C, but did not assess alcohol use), only the explicitly defined proportions were included (in this example, including proportions for hepatitis B and C, and excluding any remainder). Remaining etiologies were included under a combined "other" group (for example, hemochromatosis, autoimmune hepatitis, Wilson's disease, etc.). If multiple etiologies were reported for an individual patient, these were apportioned proportionally to the individual etiologies.

The proportion data found through the systematic literature review were used as input for five separate DisMod-MR 2.1<sup>2</sup> models to determine the proportion of liver cancers due to the five subgroups for all locations, both sexes, and all GBD age groups (step #16 in eFigure 1). For liver cancer due to hepatitis C and hepatitis B, a prior value of 0 percent was set between age 0 and 0.01 years. For liver cancer due to alcohol, a prior value of 0 percent was set for ages 0 to 5 years. Covariates differed by model and direction. The liver cancer due to alcohol model included positive covariates for the liters of alcohol consumed *per capita* and the proportion of cirrhosis due to alcohol, and a negative covariate for the proportion of alcohol abstainers. The liver cancer due to hepatitis B model included positive covariates for hepatitis B seroprevalence (HBsAg) and the proportion of cirrhosis due to hepatitis B, and a negative covariate for 10-year lagged hepatitis B 3-dose vaccine coverage. The liver cancer due to hepatitis C model included positive covariates for hepatitis C seroprevalence (anti-HCV) and the proportion of cirrhosis due to hepatitis C. The liver cancer due to NASH model included positive covariates for mean body mass index, the prevalence of obesity, the prevalence of NASH and non-alcoholic fatty liver disease, and the proportion of cirrhosis due to NASH. The liver cancer due to other causes model included a positive covariate for the proportion of cirrhosis due to other causes. To ensure consistency between cirrhosis and liver cancer estimates and to take advantage of the data for the related causes (e.g., "liver cancer due to hepatitis C" and the related cause "cirrhosis due to hepatitis C"), we generated covariates from initial liver cancer proportion models that were used in the cirrhosis etiology proportion models. Estimates from the cirrhosis etiology proportion models were then used to make covariates for use in the final liver cancer etiology models. More information about cirrhosis modeling can be found in the "Cirrhosis" section of the appendix to the GBD 2019 paper "Global burden of 369 diseases and injuries in 204 countries and territories, 1990–2019: a systematic analysis for the Global Burden of Disease Study 2019."<sup>2</sup>

Since the proportion models were run independently of each other, the final proportion estimates were scaled to sum to 100% within each age, sex, year, and location, by dividing each proportion by the sum of the five (step # 17 in eFigure 1). For the liver cancer subtype mortality estimates, we multiplied the

parent cause “liver cancer” deaths by the corresponding scaled proportions (step # 18 in eFigure 1). Single cause estimates were later adjusted to fit into the separately modeled all-cause mortality in the process CoDCorrect.

### CoDCorrect

CODEm models estimate the individual cause-level mortality without taking into account the independently modeled all-cause mortality (#13 in eFigure 1). To ensure that all single causes add up to the all-cause mortality and that all child-causes add up to the parent cause, an algorithm called “CoDCorrect” is used (#14 and #15 in eFigure 1). Further details on the CoDCorrect algorithm can be found in Section 3.3.2 of the appendix to the GBD 2019 paper “Global burden of 369 diseases and injuries in 204 countries and territories, 1990–2019: a systematic analysis for the Global Burden of Disease Study 2019.”<sup>2</sup> Final mortality estimates at the 1000-draw level provide an estimated mean mortality with 95% uncertainty interval.

### Calculating YLLs

To calculate years of life lost (YLLs), final death estimates after CoDCorrect adjustment are multiplied by the standard GBD life expectancy given the age at death, sex, and location. Further details on GBD life expectancy values can be found in the GBD 2019 paper “Global age-sex-specific fertility, mortality, health life expectancy (HALE), and population estimates in 2014 countries and territories, 1950-2019: a comprehensive demographic analysis for the Global Burden of Disease Study 2019.”<sup>4</sup> Uncertainty is propagated from the CoDCorrect mortality estimates, calculating YLLs for each of the 1000 CoDCorrect draws to provide estimated mean YLLs with corresponding 95% uncertainty intervals.

### Incidence estimation

The final GBD cancer mortality estimates (after CoDCorrect adjustment) were transformed to incidence estimates by using the MIRs specific to that cancer cause (#1 in eFigure ). Final mortality estimates at the 1000-draw level were divided by the modeled MIR estimates (also at the 1000-draw level) to generate 1000 draws of incidence estimates (which provides an estimated mean incidence with 95% uncertainty interval). It was assumed that uncertainty in the MIRs is independent of uncertainty in the estimated mortality.

### Prevalence estimation

After transforming the final GBD cancer mortality estimates to incidence estimates (step 1 in eFigure 2), incidence was combined with annual relative survival estimates from 1 to 10 years after diagnosis (step 7 in the flowchart). Prior to GBD 2017 we used an access to care metric to scale survival for each location between two survival curves representing presumed “best case” and “worst case” survival.<sup>25,26</sup> For GBD 2017, we updated this method in order to more directly utilize MIRs to estimate yearly cancer relative survival.<sup>1</sup> For GBD 2019 we updated these methods to estimate age-specific rather than all-ages survival curves.

Previous reports suggest that the value of  $(1 - \text{MIR})$  may serve as a proxy for 5-year relative survival, with the exact correlation varying slightly by cancer type.<sup>27</sup> Because this correlation varies, we trained cancer-specific prediction models to estimate 5-year survival from MIRs, using data from SEER<sup>7</sup>. We used SEER\*Stat<sup>28</sup> to obtain mortality, incidence, and relative survival statistics from the nine SEER registries reporting from 1980-2014 (step 2), by cancer type, sex, 5-year blocks (i.e., 1980-84, 1985-1989, etc.), and 5-year age groups (except combining 80+). For each cancer, we modelled SEER 5-year relative



survival using MIRs calculated from SEER mortality and incidence. For GBD 2019 we updated this model from the Poisson regression used in GBD 2017<sup>1</sup> to using a generalized linear model with a quasibinomial family and logit link, weighted by the number of index cases (step 3 in eFigure 2). To reduce variability due to small samples, we only included MIRs based on at least 25 incident cases (except for the cancers mesothelioma, nasopharynx cancer, and acute lymphoid leukemia, where MIRs based on at least 10 cases were included). These models were then applied to the GBD MIR estimates to predict an estimated 5-year survival for each age/sex/year/location (step 4). To prevent unrealistic values, predicted 5-year survival values were Winsorized to be between 0% and 100% survival. Unlike GBD 2017, we did not require the estimated age-specific 5-year survival to be greater than the all-ages worst-case survival scenario from SurvCan and US 1950 survival data<sup>29,30</sup>, since age-specific survival could be plausibly lower than for these all-ages scenarios.

To generate yearly survival estimates up to 10 years, in GBD 2019 we downloaded SEER sex- and age-specific annual 1- through 10-year relative survival data from persons diagnosed between 2001 and 2010 (2001 through 2010 so that all cases had at least 5 years of follow-up, with half having the full 10 years of follow-up). This is updated from GBD 2017, where we downloaded all-ages survival data from persons diagnosed in 2004 (2004 so that all cases had the full 10 years of follow-up).<sup>31</sup> A proportional scalar was calculated as the predicted GBD 5-year survival estimate divided by the SEER 5-year survival statistic, and was then used to generate yearly survival estimates by scaling the 1-10 year SEER curve to the GBD survival predictions under the proportional hazard assumption (step 5). This change from GBD 2017 (where we used SEER all-ages data from 2004 as the scalar and survival curve) impacts prevalence and YLD estimation, generally leading to survival estimates that are higher for younger ages and lower for older ages compared to estimates using the all-ages curve.

The estimated relative survival is next transformed into absolute survival estimates (steps 6 and 7 in eFigure 2). To account for background mortality in the relative survival estimates, GBD 2019 lifetables were used to calculate lambda ( $\lambda$ ) values:

$$\lambda = \frac{\ln\left(\frac{nLx_n}{nLx_{n+1}}\right)}{5}$$

$nLx$  = person years lived between ages  $x$  and  $x+n$  (from GBD lifetable).

Absolute survival was then calculated using these lambda values in an exponential survival function:

$$\text{absolute survival} = \text{relative survival} * e^{\lambda * t}$$

$t$  = time (in years)

Absolute survival is combined with incidence to estimate the prevalence at each year 1 through 10 after diagnosis, which is then split into the four sequelae (step 8 in the flowchart). For the purposes of calculating disability due to cancer, survivors beyond 10 years were considered cured. For this group, the survivor population prevalence was divided into two sequelae: (1) diagnosis and primary therapy phase; and (2) controlled phase. For the population that did not survive beyond 10 years, the yearly prevalence was divided into the four sequelae by assigning the fixed durations for each of the (1) diagnosis and primary therapy phase, (3) metastatic phase, and (4) terminal phase, and assigning the remaining prevalence to the (2) controlled phase (step 8 in the flowchart). Duration of these four

sequelae remained the same as for GBD 2013,<sup>32</sup> GBD 2015,<sup>25</sup> GBD 2016,<sup>26</sup> and GBD 2017.<sup>1</sup> eTable 12 lists the duration of each, along with the sources used to determine their length.<sup>33–38</sup>

For cancer-specific procedure sequelae, hospital data were used to estimate the number of cancer patients undergoing mastectomy, laryngectomy, stoma, prostatectomy, and cystectomy (step 9 in the flowchart). Proportions were generated by dividing the rate of procedures generated from the diagnostic codes in the hospital dataset and the coverage population by the GBD age-, and sex-specific disease incidence rates for that country.

To estimate procedure-related disability for each of these five cancers, the procedure proportions (proportion of each cancer population that undergo these procedures) from hospital data were used as input for a proportion model in DisMod-MR 2.1<sup>2</sup> to estimate the proportions for all locations, by age, year, and sex. Details of clinical and claims data processing are available in section 4.3.4 of the appendix to the GBD 2019 paper “Global burden of 369 diseases and injuries in 204 countries and territories, 1990–2019: a systematic analysis for the Global Burden of Disease Study 2019.”<sup>2</sup>

Since colostomy or ileostomy procedures are done for reasons other than cancer, a literature review was conducted to determine the proportion of ostomies due to colon and rectum cancer. Based on the results of the literature review that an average of 58% of ostomies are done for colon and rectum cancer, the “all cause” colostomy proportions were multiplied by 0.58.<sup>39–41</sup>

The final procedure proportions were applied to the incident cases of the respective cancers and multiplied with the proportion of the incident population surviving for 10 years to determine the incident cases of the cancer population that underwent procedures and that survived beyond 10 years. These incident cases were used again as an input for DisMod-MR 2.1, with a remission specification of zero and an excess mortality rate prior of 0 to 0.1, as well as with increasing both the age of the population and the year by 10 years to reflect prevalence after that population has survived 10 years. The results from this model are incidence and lifetime prevalent cases of persons with these cancer-related sequelae who have survived beyond 10 years.

Since disability associated with prostatectomy comes from impotence and incontinence, and not from the prostatectomy itself, 18% of the prostatectomy prevalence was assumed to have incontinence and 55% was assumed to have impotence, based on a literature review done for GBD 2013.<sup>42–49</sup> Cases were assigned disability for either impotence or incontinence, but no cases were assigned disability from both.

We assumed that for the population surviving up to 10 years, only the prevalence population being in remission experiences additional disability due to procedures (e.g. women suffering from metastatic breast cancer do not experience additional disability due to a mastectomy during this phase). To estimate the prevalence of the cancer population in remission during the first 10 years after diagnosis with and without procedure-related disability, we multiplied the prevalence of the population in the remission phase with the proportion of the population undergoing a procedure. This step allowed us to estimate disability during the remission phase for both the population experiencing disability due to the remission phase alone, as well as the population experiencing disability from the remission phase and the additional procedure-related disability.

Lastly, the procedure sequelae prevalence and general sequelae prevalence were multiplied with their respective disability weights (eTable 12) to obtain the number of YLDs (steps 11 and 12 in the flowchart). The methods used to generate disability weights are described in Section 4.8, “Disability weights” in the appendix to the paper “Global burden of 369 diseases and injuries in 204 countries and territories, 1990-2019: a systematic analysis for the Global Burden of Disease Study 2019.”<sup>2</sup> In brief, disability weights are created from survey data to represent the magnitude of health loss associated with an outcome. These disability weights range from 0, implying a state equivalent to full health, to 1, a state equivalent to death. The sum of these YLDs is the final YLD estimate associated with each cancer cause.

## Reporting Standards

Countries and territories reported can be found in eTable . All rates are reported per 100 000 person-years. Annualized rates of change (ARC) from 2010 to 2019 represent the average percentage change per year over this period, and are calculated as:

$$ARC = \frac{\ln\left(\frac{X_{y2}}{X_{y1}}\right)}{y2-y1}$$

X<sub>yn</sub> = value of measure (e.g. incidence) at year <sub>y<sub>n</sub></sub>

y1 = starting year (e.g. 2010)

y2 = ending year (e.g. 2019)

The GBD world population age standard was used to calculate age-standardized rates presented throughout GBD. In GBD 2017 and 2019, we used the non-weighted mean of the GBD year’s age-specific proportional distributions for national locations with populations greater than 5 million in the GBD year to update the world population age standard.<sup>4</sup> The final values used for the age standard are specified in Appendix Table 13 of the GBD 2019 paper “Global age-sex-specific fertility, mortality, health life expectancy (HALE), and population estimates in 204 countries and territories, 1950-2019: a comprehensive demographic analysis for the Global Burden of Disease Study 2019.”<sup>4</sup>

## Socio-demographic Index (SDI)

Methods for the calculation of SDI and SDI quintiles are described in appendix section 2.10 of the GBD 2019 paper “Global burden of 369 diseases and injuries in 204 countries and territories, 1990-2019: a systematic analysis for the Global Burden of Disease Study 2019.”<sup>2</sup> In brief, SDI is a summary indicator to represent background levels of social and economic conditions that can influence health outcomes in a given location. This summary indicator comprises three indices: lag-distributed income *per capita*, mean education for those aged 15 years or older, and total fertility rate for those younger than 25 years of age. Possible values for each of these three indices range from 0 to 1, representing the bounds with which lower or higher values of the level of development for that index would no longer worsen or improve health outcomes, respectively. The composite SDI is the geometric mean of these three indices for a given location-year. For reporting purposes, values were multiplied by 100 to obtain SDI on a scale of 0 to 100. The SDI cutoffs for determining SDI quintiles for analysis were computed by using the country-level estimates of SDI for the year 2019, excluding countries with populations less than 1 million. For GBD 2019 analyses, all locations are assigned to these quintiles according to their SDI value

in the year 2019.

|                                              | Low SDI               | Low-middle SDI        | Middle SDI            | High-middle SDI       | High SDI            |
|----------------------------------------------|-----------------------|-----------------------|-----------------------|-----------------------|---------------------|
| SDI value range in 2019                      | 0 - 45.98             | 45.99 - 60.96         | 60.97 - 70.19         | 70.20 - 80.71         | 80.72 - 100         |
| Number of countries and territories          | 35                    | 42                    | 41                    | 46                    | 40                  |
| Total population in 2019, millions (95% UI)  | 1 130 (1 080 - 1 170) | 1 760 (1 670 - 1 860) | 2 400 (2 280 - 2 510) | 1 430 (1 350 - 1 510) | 1 010 (966 - 1 060) |
| Total population in 2010, millions (95% UI)  | 956 (931 - 979)       | 1 360 (1 320 - 1 390) | 2 200 (2 140 - 2 270) | 1 570 (1 510 - 1 620) | 901 (873 - 929)     |
| Female population in 2019, millions (95% UI) | 563 (540 - 585)       | 878 (833 - 923)       | 1 190 (1 130 - 1 250) | 716 (676 - 753)       | 508 (484 - 531)     |
| Female population in 2010, millions (95% UI) | 481 (469 - 493)       | 681 (662 - 699)       | 1 090 (1 060 - 1 120) | 775 (747 - 800)       | 447 (434 - 461)     |
| Male population in 2019, millions (95% UI)   | 566 (543 - 589)       | 886 (840 - 934)       | 1 210 (1 150 - 1 260) | 715 (674 - 753)       | 506 (482 - 528)     |
| Male population in 2010, millions (95% UI)   | 475 (463 - 486)       | 675 (655 - 695)       | 1 110 (1 080 - 1 150) | 792 (763 - 819)       | 454 (440 - 468)     |

## Interpretation of results

### Changes in GBD 2019 methods and results from GBD 2017

Cancer mortality estimates for GBD 2019 can differ from the GBD 2017 results for multiple reasons. Updated cancer mortality data were added from vital registration systems and updated incidence and mortality data from cancer registries. Previously all deaths with ICD-10 code C22.9 (“Malignant neoplasm of liver, not specified as primary or secondary”) were mapped to liver cancer, but included deaths from liver metastases rather than primary liver cancer alone; for GBD 2019, these deaths were instead mapped as garbage codes and redistributed to liver and 13 other cancers (colon and rectum, pancreas, prostate, breast, esophagus, bladder, kidney, stomach, ovary, uterus, cervix, gallbladder, testes). The mortality-to-incidence ratio estimation was updated with lower case inclusion criteria and different model hyperparameters compared to GBD 2017, leading to more training data and less smoothing across age and time. Covariates and model parameters used in CODEm models were updated for GBD 2019. This included removing or replacing covariates that had been updated by other GBD teams (primarily dietary covariates), assigning a prior for direction of association to all covariates (previously covariates such as income and Socio-demographic Index had been allowed to have agnostic direction priors), and changing the minimum age ranges for which the models estimated mortality. For GBD 2019, the minimum age group estimated for each cancer was set as the youngest age group where at least 50 incident cancers were reported in SEER over the 25-year period 1990-2015. Though based solely on incidence data from the United States, this represents a data-driven improvement over prior GBD cycles, where age restriction was based on expert opinion. An area of future development will be to evaluate this cutoff using data from additional locations.

### Comparison to GLOBOCAN

Another major group producing country-level cancer mortality estimates is the International Agency for Research on Cancer (IARC) with their GLOBOCAN database.<sup>50</sup> Significantly different methods between the GBD study and GLOBOCAN can lead to differences in results. For GLOBOCAN, estimates are produced separately at the national level, using several different regression or imputation models differentially by country depending on the data available.<sup>51</sup> For the GBD, cancer estimation occurs globally across all locations following a consistent, well-documented ensemble modeling approach that includes relevant covariate data, which allows cross-validation of models as well as determination of uncertainty. Another major difference is the ability in the GBD study to adjust individual causes of death to the all-cause mortality envelope, which is estimated separately, allowing GBD to correct for the under-diagnosis of cancer in countries with inadequate diagnostic resources. Redistribution of a fraction of undefined causes of death to certain cancers is another methodological advantage of the GBD study, and estimates for cancer mortality can therefore differ substantially in countries with a large proportion of undefined causes of deaths in their vital registration data or a large proportion of undefined cancer

cases in their cancer registry data. There are also differences in the inclusion and categorization of cancer types reported: basal cell carcinoma cases are included in GBD total cancer incidence estimates, but excluded in GLOBOCAN; some cancers are individually reported in GLOBOCAN (e.g., penis cancer), which in the GBD are included within the “other malignant neoplasms” group.

### Limitations

There are certain limitations to consider when interpreting the GBD mortality cancer estimates. First, even though every effort is made to include the most recently available data for each country, data seeking resources are not limitless and new data cannot always be accessed as soon as they are made available. It is therefore possible that the GBD study does not include all available data sources for cancer incidence or cancer mortality. Second, different redistribution methods can potentially change the cancer estimates substantially if the data sources used for the estimated location contain a large number of undefined causes; however, neglecting to account for these undefined deaths would likely introduce an even greater bias in the disease estimates. Third, using mortality-to-incidence ratios to transform cancer registry incidence data to mortality estimates requires accurate MIRs. For GBD 2019 we have made further refinements to the estimation of MIRs, but the method remains sensitive to under-diagnosis of cancer cases or under-ascertainment of cancer deaths. However, given that the majority of data used for the cancer mortality estimation come from vital registration data and not cancer registry data, this is not a major limitation. There are several geographic locations where estimates are not available (e.g. Western Sahara, French Guiana) as they were not modelled locations in the GBD 2019.<sup>2</sup> These countries are colored white in the global map figures included in this paper.

## Additional method summaries for Non-melanoma skin cancer (squamous and basal cell carcinoma)

### Case definition

The Level 3 cause “non-melanoma skin cancer” (NMSC) is comprised of two Level 4 causes, “basal cell carcinoma” and “squamous cell carcinoma.” NMSC in the GBD analysis does not include other types of skin cancer (e.g., melanoma, Merkel cell carcinoma).

### Input data

Since mortality estimates for non-melanoma skin cancer are only produced for squamous-cell carcinoma under the assumption that basal-cell carcinoma causes almost no deaths, all mortalities reported as “C44” or “173” were mapped to the “squamous-cell carcinoma” GBD cause. We estimated squamous cell and basal cell skin cancer incidence by using data from cancer registries, primary literature, clinical data, and insurance claims. Only cancer registries that were listed in CI5 as registering squamous cell carcinoma or basal cell carcinoma, respectively, were included in the analysis. Details of clinical and claims data processing are available in section 4.3.4 of the appendix to the GBD 2019 paper “Global burden of 369 diseases and injuries in 204 countries and territories, 1990–2019: a systematic analysis for the Global Burden of Disease Study 2019.”<sup>2</sup> Clinical informatics sources include the MarketScan administrative claims database in the United States.<sup>52</sup> For 2019, the clinical data were adjusted to account for differences in healthcare access and quality across time and space, and corrected to account for outpatient encounters that did not warrant an inpatient hospital admission. This is a change from GBD 2017, where these data only included non-primary diagnoses in inpatient admissions. This change in GBD 2019 led to higher values in the input clinical informatics data compared to GBD 2017, as it now includes diagnoses from outpatient procedures that did not require hospital admission (whereas

previously these data approximated the rate of inpatient admissions for NMSC cases who had access to hospitals).

### Modeling strategy

Non-melanoma skin cancer deaths are modeled in CODEm using vital registration data, as detailed above. All non-melanoma skin cancer deaths are modeled as squamous cell carcinoma deaths, as we make an assumption that there are no deaths from basal cell carcinoma.

For cancer registry data reported at the three-digit level (i.e., C44: Other and unspecified malignant neoplasm of skin), proportions from Karagas et al were used to split C44 into squamous cell carcinoma and basal cell carcinoma.<sup>53</sup> The only new data compared to GBD 2017 was additional data from hospital and outpatient sources. For both basal cell carcinoma and squamous cell carcinoma, DisMod-MR 2.1<sup>2</sup> models were used to model incidence and prevalence. Prevalence was calculated as a function of two extreme scenarios (duration 1 versus 5 years). Country-, age-, sex-, and year-specific duration was estimated using a country-age-sex-year-specific relative access-to-care-score.

The access to care score was based on the melanoma mortality-to-incidence ratio:

$$\text{Access to care} = 1 - \frac{\text{Age standardized } MIR_{cys} - \text{Age standardized } MIR_{min}}{\text{Age standardized } MIR_{max} - \text{Age standardized } MIR_{min}}$$

c=country; y=year; s=sex; Age-standardized  $MIR_{min}$ =lowest MIR for all countries and years; Age standardized  $MIR_{max}$ =highest MIR for all countries and years

Remission was calculated as the inverse of the duration estimates and used as additional input for DisMod-MR 2.1.

To reflect differing degrees of disability due to squamous cell carcinoma, we used three levels of severity that were derived from the Medical Expenditure Panel Survey (MEPS),<sup>54</sup> resulting in proportions of 80% mild, 15% moderate, and 5% severe disfigurement. For basal cell carcinoma, disability severity was split into 60% asymptomatic (without disability) and 40% with mild disfigurement. Prevalence was multiplied by distinct disability weights (eTable 13) to generate YLDs.

### Interpretation of results

Non-melanoma skin cancer mortality estimates are generally not available from other sources. Even though the data availability for non-melanoma skin cancer is poor, the fact that it is the most common incident cancer, with rates expected to rise globally, makes it important to include the disease in the GBD framework.

### Limitations

Cancer registry data for non-melanoma skin cancer incidence have to be interpreted with caution due to a substantial amount of under-reporting or rules that only the first non-melanoma skin cancer has to be registered. Many cancer registries therefore do not include non-melanoma skin cancers at all. However, the information regarding whether registries capture NMSC or not is not consistently available.

Therefore, no cancer registry data were used to estimate deaths due to squamous-cell carcinoma of the skin. For vital registration data, we make the assumption that there are no deaths due to basal-cell non-

melanoma skin cancer, and therefore all deaths attributed to basal-cell carcinoma were included instead as squamous-cell carcinoma.

## References

1. Fitzmaurice C, Abate D, Abbasi N, et al. Global, Regional, and National Cancer Incidence, Mortality, Years of Life Lost, Years Lived With Disability, and Disability-Adjusted Life-Years for 29 Cancer Groups, 1990 to 2017: A Systematic Analysis for the Global Burden of Disease Study. *JAMA Oncol.* 2019;5(12):1749-1768. doi:10.1001/jamaoncol.2019.2996
2. Vos T, Lim SS, Abbafati C. Global burden of 369 diseases and injuries in 204 countries and territories, 1990–2019: a systematic analysis for the global burden of disease study 2019. *The Lancet.* 2020;396(10258):1204-1222.
3. Murray CJL, Aravkin AY, Zheng P, et al. Global burden of 87 risk factors in 204 countries and territories, 1990–2019: a systematic analysis for the Global Burden of Disease Study 2019. *The Lancet.* 2020;396(10258):1223-1249.
4. Wang H, Abbas KM, Abbasifard M, et al. Global age-sex-specific fertility, mortality, healthy life expectancy (HALE), and population estimates in 204 countries and territories, 1950-2019: a comprehensive demographic analysis for the Global Burden of Disease Study 2019. *Lancet Lond Engl.* 2020;396(10258):1160-1203. doi:10.1016/S0140-6736(20)30977-6
5. Stevens GA, Alkema L, Black RE, et al. Guidelines for Accurate and Transparent Health Estimates Reporting: the GATHER statement. *The Lancet.* 2016;388(10062):e19-e23. doi:10.1016/S0140-6736(16)30388-9
6. World Health Organization. International Classification of Diseases (ICD). Published 2018. Accessed February 25, 2020. <http://www.who.int/classifications/icd/en/>
7. Surveillance, Epidemiology, and End Results (SEER) Program ([www.Seer.Cancer.Gov](http://www.Seer.Cancer.Gov)) SEER\*Stat Database: Incidence - SEER 18.
8. Doll R, Payne P, Waterhouse J, eds. *Cancer Incidence in Five Continents, Vol. I.* Union Internationale Contre le Cancer; 1966. Accessed February 24, 2021. <https://publications.iarc.fr/Non-Series-Publications/Other-Non-Series-Publications/Cancer-Incidence-In-Five-Continents-Volume-I-1966>
9. Doll R, Muir CS, Waterhouse JA. *Cancer Incidence in Five Continents, Vol. II.* Union Internationale Contre le Cancer; 1970.
10. Waterhouse J, Muir C, Correa P, Powell J. *Cancer Incidence in Five Continents III.* Lyon: IARC; 1976.
11. Waterhouse J, Muir C, Shanmugaratnam K, Powell J. *Cancer Incidence in Five Continents IV.* Lyon: IARC; 1982.
12. Muir C, Mack T, Powell J, Whelan S. *Cancer Incidence in Five Continents V.* Lyon: IARC; 1987.
13. Parkin D, Muir C, Whelan S, Gao Y, Ferlay J, Powell J. *Cancer Incidence in Five Continents VI.* Lyon: IARC; 1992.
14. Parkin D, Whelan S, Ferlay J, Raymond L, Young J. *Cancer Incidence in Five Continents VII.* Lyon: IARC; 1997.



15. Parkin D, Whelan S, Ferlay J, Teppo L, Thomas D. Cancer Incidence in Five Continents VIII. Lyon: IARC; 2002.
16. Curado M, Edwards B, Shin H, et al. Cancer Incidence in Five Continents IX. Lyon: IARC; 2007. <http://www.iarc.fr/en/publ>.
17. Forman D, Bray F, Brewster D, et al. Cancer Incidence in Five Continents X. <http://ci5.iarc.fr>. Published 2013.
18. Bray F, Colombet M, Mery L, et al., eds. *Cancer Incidence in Five Continents*. Vol XI (electronic version). International Agency for Research on Cancer; 2017. <https://ci5.iarc.fr>
19. Steliarova-Foucher E, O'Callaghan M, Ferlay J, et al. The European Cancer Observatory: A new data resource. *Eur J Cancer Oxf Engl* 1990. 2015;51(9):1131-1143. doi:10.1016/j.ejca.2014.01.027
20. Engholm G, Ferlay J, Christensen N, et al. NORDCAN--a Nordic tool for cancer information, planning, quality control and research. *Acta Oncol Stockh Swed*. 2010;49(5):725-736. doi:10.3109/02841861003782017
21. Barber RM, Fullman N, Sorensen RJD, et al. Healthcare Access and Quality Index based on mortality from causes amenable to personal health care in 195 countries and territories, 1990-2015: a novel analysis from the Global Burden of Disease Study 2015. *Lancet Lond Engl*. 2017;390(10091):231-266. doi:10.1016/S0140-6736(17)30818-8
22. Foreman KJ, Lozano R, Lopez AD, Murray CJ. Modeling causes of death: an integrated approach using CODEm. *Popul Health Metr*. 2012;10:1. doi:10.1186/1478-7954-10-1
23. de Martel C, Maucort-Boulch D, Plummer M, Franceschi S. World-wide relative contribution of hepatitis B and C viruses in hepatocellular carcinoma. *Hepatol Baltim Md*. 2015;62(4):1190-1200. doi:10.1002/hep.27969
24. Hong TP, Gow P, Fink M, et al. Novel population-based study finding higher than reported hepatocellular carcinoma incidence suggests an updated approach is needed. *Hepatol Baltim Md*. 2016;63(4):1205-1212. doi:10.1002/hep.28267
25. Fitzmaurice C, Allen C, Barber RM, et al. Global, Regional, and National Cancer Incidence, Mortality, Years of Life Lost, Years Lived With Disability, and Disability-Adjusted Life-years for 32 Cancer Groups, 1990 to 2015: A Systematic Analysis for the Global Burden of Disease Study. *JAMA Oncol*. 2016;3(4):524-548. doi:10.1001/jamaoncol.2016.5688
26. Fitzmaurice C, Akinyemiju TF, Al Lami FH, et al. Global, Regional, and National Cancer Incidence, Mortality, Years of Life Lost, Years Lived With Disability, and Disability-Adjusted Life-Years for 29 Cancer Groups, 1990 to 2016: A Systematic Analysis for the Global Burden of Disease Study. *JAMA Oncol*. 2018;4(11):1553-1568. doi:10.1001/jamaoncol.2018.2706
27. Asadzadeh Vostakolaei F, Karim-Kos HE, Janssen-Heijnen MLG, Visser O, Verbeek ALM, Kiemeneij LALM. The validity of the mortality to incidence ratio as a proxy for site-specific cancer survival. *Eur J Public Health*. 2011;21(5):573-577. doi:10.1093/eurpub/ckq120
28. *SEER\*Stat Software*.; 2014. <http://seer.cancer.gov/seerstat/>

29. Sankaranarayanan R, Swaminathan R, Lucas E. *Cancer Survival in Africa, Asia, the Caribbean and Central America (SurvCan)*.
30. National Center for Health Statistics, Centers for Disease Control and Prevention. US Mortality Files. 61-Year Trends in U.S. Cancer Death Rates.  
[http://seer.cancer.gov/archive/csr/1975\\_2010/results\\_merged/topic\\_historical\\_mort\\_trends.pdf](http://seer.cancer.gov/archive/csr/1975_2010/results_merged/topic_historical_mort_trends.pdf)
31. SEER Cancer Statistics Review 1975-2011.  
[http://seer.cancer.gov/csr/1975\\_2011/results\\_merged/topic\\_survival\\_by\\_year\\_dx.pdf](http://seer.cancer.gov/csr/1975_2011/results_merged/topic_survival_by_year_dx.pdf)
32. Fitzmaurice C, Dicker D, Pain A, et al. The Global Burden of Cancer 2013. *JAMA Oncol*. 2015;1(4):505-527. doi:10.1001/jamaoncol.2015.0735
33. Neal RD, Din NU, Hamilton W, et al. Comparison of cancer diagnostic intervals before and after implementation of NICE guidelines: analysis of data from the UK General Practice Research Database. *Br J Cancer*. 2014;110(3):584-592. doi:10.1038/bjc.2013.791
34. *Surveillance, Epidemiology, and End Results (SEER) Program (Www.Seer.Cancer.Gov) SEER\*Stat Database: Incidence - SEER 18 Regs Research Data + Hurricane Katrina Impacted Louisiana Cases, Nov 2012 Sub (1973-2010 Varying) - Linked To County Attributes - Total U.S., 1969-2011 Counties, National Cancer Institute, DCCPS, Surveillance Research Program, Surveillance Systems Branch, Released April 2013, Based on the November 2012 Submission*.
35. Allgar VL, Neal RD. Delays in the diagnosis of six cancers: analysis of data from the National Survey of NHS Patients: Cancer. *Br J Cancer*. 2005;92(11):1959-1970. doi:10.1038/sj.bjc.6602587
36. Neal RD, Cannings-John R, Hood K, et al. Excision of malignant melanomas in North Wales: effect of location and surgeon on time to diagnosis and quality of excision. *Fam Pract*. 2008;25(4):221-227. doi:10.1093/fampra/cmn036
37. Kewalramani T, Nimer SD, Zelenetz AD, et al. Progressive disease following autologous transplantation in patients with chemosensitive relapsed or primary refractory Hodgkin's disease or aggressive non-Hodgkin's lymphoma. *Bone Marrow Transplant*. 2003;32(7):673-679. doi:10.1038/sj.bmt.1704214
38. Esteban D, Tovar N, Jiménez R, et al. Patients with relapsed/refractory chronic lymphocytic leukaemia may benefit from inclusion in clinical trials irrespective of the therapy received: a case-control retrospective analysis. *Blood Cancer J*. 2015;5:e356. doi:10.1038/bcj.2015.78
39. Canova C, Giorato E, Roveron G, Turrini P, Zanotti R. Validation of a stoma-specific quality of life questionnaire in a sample of patients with colostomy or ileostomy. *Colorectal Dis Off J Assoc Coloproctology G B Irel*. 2013;15(11):e692-698. doi:10.1111/codi.12324
40. Caricato M, Ausania F, Ripetti V, Bartolozzi F, Campoli G, Coppola R. Retrospective analysis of long-term defunctioning stoma complications after colorectal surgery. *Colorectal Dis Off J Assoc Coloproctology G B Irel*. 2007;9(6):559-561. doi:10.1111/j.1463-1318.2006.01187.x
41. Erwin-Toth P, Thompson SJ, Davis JS. Factors impacting the quality of life of people with an ostomy in North America: results from the Dialogue Study. *J Wound Ostomy Cont Nurs Off Publ Wound Ostomy Cont Nurses Soc WOCN*. 2012;39(4):417-422; quiz 423-424. doi:10.1097/WON.0b013e318259c441

42. Catalona WJ, Carvalhal GF, Mager DE, Smith DS. Potency, continence and complication rates in 1,870 consecutive radical retropubic prostatectomies. *J Urol*. 1999;162(2):433-438.
43. Donnellan SM, Duncan HJ, MacGregor RJ, Russell JM. Prospective assessment of incontinence after radical retropubic prostatectomy: objective and subjective analysis. *Urology*. 1997;49(2):225-230. doi:10.1016/S0090-4295(96)00451-7
44. Eastham JA, Kattan MW, Rogers E, et al. Risk factors for urinary incontinence after radical prostatectomy. *J Urol*. 1996;156(5):1707-1713.
45. Kundu SD, Roehl KA, Eggener SE, Antenor JAV, Han M, Catalona WJ. Potency, continence and complications in 3,477 consecutive radical retropubic prostatectomies. *J Urol*. 2004;172(6 Pt 1):2227-2231.
46. Potosky AL, Davis WW, Hoffman RM, et al. Five-Year Outcomes After Prostatectomy or Radiotherapy for Prostate Cancer: The Prostate Cancer Outcomes Study. *JNCI J Natl Cancer Inst*. 2004;96(18):1358-1367. doi:10.1093/jnci/djh259
47. Sacco E, Prayer-Galetti T, Pinto F, et al. Urinary incontinence after radical prostatectomy: incidence by definition, risk factors and temporal trend in a large series with a long-term follow-up. *BJU Int*. 2006;97(6):1234-1241. doi:10.1111/j.1464-410X.2006.06185.x
48. Stanford JL, Feng Z, Hamilton AS, et al. Urinary and sexual function after radical prostatectomy for clinically localized prostate cancer: the Prostate Cancer Outcomes Study. *JAMA*. 2000;283(3):354-360.
49. Walsh PC, Marschke P, Ricker D, Burnett AL. Patient-reported urinary continence and sexual function after anatomic radical prostatectomy. *Urology*. 2000;55(1):58-61.
50. Ferlay J, Ervik M, Lam F, et al. Global Cancer Observatory: Cancer Today. Lyon, France: International Agency for Research on Cancer. Published 2020. Accessed March 10, 2021. <https://gco.iarc.fr/today>
51. Ferlay J, Colombet M, Soerjomataram I, et al. Estimating the global cancer incidence and mortality in 2018: GLOBOCAN sources and methods. *Int J Cancer*. 2019;144(8):1941-1953. doi:<https://doi.org/10.1002/ijc.31937>
52. Truven Health Analytics. United States MarketScan Commercial Claims and Encounters Database. Ann Arbor, United States.
53. Karagas MR, Greenberg ER, Spencer SK, Stukel TA, Mott LA. Increase in incidence rates of basal cell and squamous cell skin cancer in New Hampshire, USA. New Hampshire Skin Cancer Study Group. *Int J Cancer J Int Cancer*. 1999;81(4):555-559.
54. Medical Expenditure Panel Survey Home. Accessed November 15, 2019. <https://meps.ahrq.gov/mepsweb/>

## Authors' Contributions

### Managing the estimation or publications process

Jonathan M Kocarnik, Kelly Compton, Christina Fitzmaurice, and Lisa M Force.

### Writing the first draft of the manuscript

Jonathan M Kocarnik, Kelly Compton, and Lisa M Force.

### Primary responsibility for applying analytical methods to produce estimates

Jonathan M Kocarnik, Frances E Dean, Weijia Fu, James D Harvey, Rixing Xu, and Lisa M Force.

### Primary responsibility for seeking, cataloguing, extracting, or cleaning data; designing or coding figures and tables

Jonathan M Kocarnik, Frances E Dean, Weijia Fu, Brian L Gaw, James D Harvey, Hannah Jacqueline Henrikson, Dan Lu, Alyssa Pennini, Rixing Xu, Lisa M Force.

### Providing data or critical feedback on data sources

Jonathan M Kocarnik, Hedayat Abbastabar, Amir Abdoli, Hassan Abidi, Hassan Abolhassani, Isaac Akinkunmi Adedeji, Qorinah Estiningtyas Sakilah Adnani, Shailesh M Advani, Muhammad Sohail Afzal, Mohammad Aghaali, Bright Opoku Ahinkorah, Sajjad Ahmad Ahmad, Tauseef Ahmad, Ali Ahmadi, Sepideh Ahmadi, Tarik Ahmed Rashid, Yusra Ahmed Salih, Gizachew Taddesse Akalu, Addis Aklilu, Chisom Joyqueenet Akunna, Hanadi Al Hamad, Fares Alahdab, Saqib Ali, Syed Mohamed Aljunid, Motasem Alkhayyat, Amir Almasi-Hashiani, Sami Almustanyir, Nelson Alvis-Guzman, Hubert Amu, Fereshteh Ansari, Maxwell Hubert Antwi, Davood Anvari, Jalal Arabloo, Morteza Arab-Zozani, Olatunde Aremu, Hany Ariffin, Timur Aripov, Al Artaman, Judie Arulappan, Avinash Aujayeb, Marcel Ausloos, Beatriz Paulina Ayala Quintanilla, Mohammed A Mohammed Azab, Amirhossein Azari Jafari, Ahmed Y Azzam, Saeed Bahadory, Atif Amin Baig, Senthilkumar Balakrishnan, Maciej Banach, Till Winfried Bärnighausen, Amadou Barrow, Devidas S Bhagat, Sonu Bhaskar, Vijayalakshmi S Bhojaraja, Sadia Bibi, Archie Bleyer, Obasanjo Afolabi Bolarinwa, Dejana Braithwaite, Florentino Luciano Caetano dos Santos, Ferrán Catalá-López, Achille Cernigliaro, Raja Chandra Chakinala, Soosanna Kumary Chattu, Vijay Kumar Chattu, Dinh-Toi Chu, Michael T Chung, Joao Conde, Paolo Angelo Cortesi, Vera Marisa Costa, Saad M A Dahlawi, Xiaochen Dai, Lalit Dandona, Rakhi Dandona, Aso Mohammad Darwesh, Fernando Pio De la Hoz, Mandira Lamichhane Dhimal, Meghnath Dhimal, Mostafa Dianatinasab, Huyen Phuc Do, Saeid Doaei, Tim Robert Driscoll, Sahar Eftekhazadeh, Arash Etemadi, Mohammed Faisaluddin, Jawad Fares, Farshad Farzadfar, Takeshi Fukumoto, Peter Andras Gaal, Mohamed M Gad, Muktar A Gadanya, Ahmad Ghashghaee, Syed Amir Gilani, Themba G Ginindza, Abraham Tamirat T Gizaw, Mahaveer Golechha, Pouya Goleij, Ricardo Santiago Gomez, Houman Goudarzi, Giuseppe Grosso, Avirup Guha, D Sanjeeva Gunasekera, Bhawna Gupta, Veer Bala Gupta, Vivek Kumar Gupta, Nima Hafezi-Nejad, Arvin Haj-Mirzaian, Rabih Halwani, Shafiul Haque, Josep Maria Haro, Ahmed I Hasaballah, Soheil Hassanipour, Roderick J Hay, Mohammad Heidari, Claudiu Herteliu, Mehdi Hosseinzadeh, Mowafa Househ, Segun Emmanuel Ibitoye, Sheikh Mohammed Shariful Islam, Nahlah Elkudssiah Ismail, Gaetano Isola, Vardhmaan Jain, Mihajlo Jakovljevic, Tahereh Javaheri, Shubha Jayaram, Seyed Behzad Jazayeri, Jost B Jonas, Tamas Joo, Nitin Joseph, Farahnaz Joukar, Mikk Jürisson, Danial Kahrizi, Leila R Kalankesh, Rohollah Kalhor, Feroze Kaliyadan, Nawzad Kameron Al-Salihi, André Karch, Ayele Semachew Kasa, Srinivasa Vittal Katikireddi, Joonas H Kauppila, Taras Kavetsky, Yousef Saleh Khader, Rovshan Khalilov, Maseer Khan, Md Nuruzzaman Khan, Young-Ho Khang, Amir M Khater, Gyu Ri Kim, Yun Jin Kim, Adnan Kisa, Sezer Kisa, Parvaiz A Koul, Sindhura Lakshmi Koulmane Laxminarayana, Burcu Kucuk Bicer, Nuworza Kugbey, G Anil Kumar, Om P Kurmi, Paolo Lauriola, Sang-woong Lee, Shaun Wen Huey Lee, Yo Han Lee,

James Leigh, Elvynna Leong, Xuefeng Liu, Muhammed Magdy Abd El Razek, Alaa Makki, Mohammad Ali Mansournia, Walter Mendoza, Ritesh G Menezes, Endalkachew Worku Mengesha, Bartosz Miazgowski, Irmina Maria Michalek, Ted R Miller, Prasanna Mithra, Masoud Moghadaszadeh, Karzan Abdulmuhsin Mohammad, Mokhtar Mohammadi, Abdollah Mohammadian-Hafshejani, Shafiu Mohammed, Ali H Mokdad, Mariam Molokhia, Lorenzo Monasta, Sumaira Mubarik, Ahamarshan Jayaraman Nagarajan, Mukhammad David Naimzada, Sreenivas Narasimha Swamy, Ionut Negoii, Cuong Tat Nguyen, Huong Lan Thi Nguyen, Robina Khan Niazi, Chukwudi A Nnaji, Chimezie Igwegbe Nzopotam, Bogdan Oancea, Felix Akpojene Ogbo, Andrew T Olagunju, Emad Omar, Ahmed Omar Bali, Abidemi E Emmanuel Omonisi, Sokking Ong, Obinna E Onwujekwe, Hans Orru, Doris V Ortega-Altamirano, Nikita Otstavnov, Stanislav S Otstavnov, Mayowa O Owolabi, Mahesh P A, Jagadish Rao Padubidri, Keyvan Pakshir, Adrian Pana, Demosthenes Panagiotakos, Songhomitra Panda-Jonas, Shahina Pardhan, Eun-Cheol Park, Fatemeh Pashazadeh Kan, Harsh K Patel, Jenil R Patel, Sanjay M Pattanshetty, David M Pereira, Renato B Pereira Pereira, Arokiasamy Perianayagam, Julian David Pillay, Maarten J Postma, Hadi Pourjafar, Liliana Preotescu, Mohammad Rabiee, Navid Rabiee, Raghu Anekal Radhakrishnan, Fakher Rahim, Amir Masoud Rahmani, Ivo Rakovac, Kiana Ramezanzadeh, Chythra R Rao, Sowmya J Rao, Reza Rawassizadeh, Andre M N Renzaho, Nima Rezaei, Jefferson Antonio Buendia Rodriguez, Luca Ronfani, Gholamreza Roshandel, Godfrey M Rwegerera, Manjula S, Siamak Sabour, Basema Saddik, Umar Saeed, Abdallah M Samy, Juan Sanabria, Senthilkumar Sankararaman, Milena M Santric-Milicevic, Brijesh Sathian, Monika Sawhney, Mete Saylan, Mario Sekerija, Allen Seylani, Masood Ali Shaikh, Mohammed Shannawaz, Sara Sheikhbahaei, Adithi Shetty, Jeevan K Shetty, Pavanchand H Shetty, K M Shivakumar, Soraya Siabani, Jasvinder A Singh, Valentin Yurievich Skryabin, Anna Aleksandrovna Skryabina, Matthew J Soeberg, Houman Sotoudeh, Daniel Sur, Viktória Szerencsés, Miklós Szócska, Rafael Tabarés-Seisdedos, Takahiro Tabuchi, Amir Taherkhani, Ker-Kan Tan, Mohamad-Hani Tamsah, Gizachew Assefa Tessema, Viveksandeep Thoguluva Chandrasekar, Nihal Thomas, Mathilde Touvier, Marcos Roberto Tovani-Palone, Bach Xuan Tran, Irfan Ullah, Saif Ullah, Krishna Kishore Umapathi, Bhaskaran Unnikrishnan, Sahel Valadan Tahbaz, Vasily Vlassov, Bay Vo, Victor Volovici, Giang Thu Vu, Yasir Waheed, Ronny Westerman, Seyed Hossein Yahyazadeh Jabbari, Sanni Yaya, Naohiro Yonemoto, Mustafa Z Younis, Chuanhua Yu, Deniz Yuce, Ismaeel Yunusa, Vesna Zadnik, Mikhail Sergeevich Zastrozhin, Anasthasia Zastrozhina, Arash Ziapour, and Christopher J L Murray.

#### [Developing methods or computational machinery](#)

Jonathan M Kocarnik, Frances E Dean, Weijia Fu, Alyssa Pennini, Rixing Xu, Ali Ahmadi, Tarik Ahmed Rashid, Yusra Ahmed Salih, Tayyaba Akram, Saqib Ali, Amir Almasi-Hashiani, Hubert Amu, Davood Anvari, Avinash Aujayeb, Mohammed A Mohammed Azab, Ahmed Y Azzam, Devasahayam J Christopher, Xiaochen Dai, Aso Mohammad Darwesh, Mostafa Dianatinasab, Saeid Doaei, Firooz Esmaeilzadeh, Mahaveer Golechha, Bhawna Gupta, Mohammad Rifat Haider, Mohammad Heidari, Mehdi Hosseinzadeh, Mowafa Househ, Rabia Hussain, Tahereh Javaheri, Danial Kahrizi, Nawzad Kameron Al-Salihi, Taras Kavetsky, Rovshan Khalilov, Adnan Kisa, Sezer Kisa, Sang-woong Lee, James Leigh, Alaa Makki, Masoud Moghadaszadeh, Mokhtar Mohammadi, Shafiu Mohammed, Ali H Mokdad, Abbas Mosapour, Emad Omar, Ahmed Omar Bali, Saeed Pirouzpanah, Amir Masoud Rahmani, Reza Rawassizadeh, Umar Saeed, Abdallah M Samy, Bay Vo, Ronny Westerman, Arash Ziapour, and Christopher J L Murray.

#### [Providing critical feedback on methods or results](#)

Jonathan M Kocarnik, Frances E Dean, Emad Ababneh, Hedayat Abbastabar, Sherief M Abd-Elsalam, Aidin Abedi, Hassan Abidi, Hassan Abolhassani, Isaac Akinkunmi Adedeji, Qorinah Estiningtyas Sakilah

Adnani, Shailesh M Advani, Muhammad Sohail Afzal, Mohammad Aghaali, Bright Opoku Ahinkorah, Sajjad Ahmad Ahmad, Tauseef Ahmad, Ali Ahmadi, Tarik Ahmed Rashid, Yusra Ahmed Salih, Gizachew Taddesse Akalu, Addis Aklilu, Tayyaba Akram, Chisom Joyqueenet Akunna, Hanadi Al Hamad, Fares Alahdab, Ziyad Al-Aly, Saqib Ali, Yousef Alimohamadi, Vahid Alipour, Syed Mohamed Aljunid, Motasem Alkhayyat, Amir Almasi-Hashiani, Nihad A Almasri, Sami Almustanyir, Nivaldo Alonso, Nelson Alvis-Guzman, Hubert Amu, Etsay Woldu Anbesu, Robert Ancuceanu, Fereshteh Ansari, Alireza Ansari-Moghaddam, Maxwell Hubert Antwi, Davood Anvari, Anayochukwu Edward Anyasodor, Muhammad Aqeel, Jalal Arabloo, Morteza Arab-Zozani, Olatunde Aremu, Hany Ariffin, Timur Aripov, Muhammad Arshad, Al Artaman, Judie Arulappan, Zatollah Asemi, Mohammad Asghari Jafarabadi, Tahira Ashraf, Prince Atorkey, Avinash Aujayeb, Marcel Ausloos, Atalel Fentahun Awedew, Beatriz Paulina Ayala Quintanilla, Temesgen Ayenew, Mohammed A Mohammed Azab, Amirhossein Azari Jafari, Ghasem Azarian, Ahmed Y Azzam, Ashish D Badiye, Atif Amin Baig, Jennifer L Baker, Senthilkumar Balakrishnan, Maciej Banach, Till Winfried Bärnighausen, Fabio Barra, Amadou Barrow, Masoud Behzadifar, Woldesellassie M Mequanint Bezabhe, Yihienew Mequanint Bezabih, Akshaya Srikanth Bhagavathula, Nikha Bhardwaj, Pankaj Bhardwaj, Sonu Bhaskar, Kritika Bhattacharyya, Vijayalakshmi S Bhojaraja, Sadia Bibi, Ali Bijani, Antonio Biondi, Archie Bleyer, Oleg Blyuss, Obasanjo Afolabi Bolarinwa, Srinivasa Rao Bolla, Dejana Braithwaite, Hermann Brenner, Nadeem Shafique Butt, Zahid A Butt, Florentino Luciano Caetano dos Santos, Yin Cao, Giulia Carreras, Ferrán Catalá-López, Francieli Cembranel, Ester Cerin, Achille Cernigliaro, Raja Chandra Chakinala, Soosanna Kumary Chattu, Vijay Kumar Chattu, Odgerel Chimed-Ochir, Daniel Youngwhan Cho, Devasahayam J Christopher, Dinh-Toi Chu, Michael T Chung, Joao Conde, Paolo Angelo Cortesi, Vera Marisa Costa, Omid Dadras, Amare Belachew Dagnew, Saad M A Dahlawi, Xiaochen Dai, Lalit Dandona, Rakhi Dandona, Aso Mohammad Darwesh, José das Neves, Fernando Pio De la Hoz, Asmamaw Bizuneh Demis, Deepak Dhamnetiya, Mandira Lamichhane Dhimal, Meghnath Dhimal, Mostafa Dianatinasab, Daniel Diaz, Shirin Djalalinia, Huyen Phuc Do, Saeid Doaei, Fariba Dorostkar, Francisco Winter dos Santos Figueiredo, Tim Robert Driscoll, Hedyeh Ebrahimi, Hassan El-Abid, Hala Rashad Elhabashy, Muhammed Elhadi, Babak Eshрати, Sharareh Eskandarieh, Firooz Esmaeilzadeh, Arash Etemadi, Mohammed Faisaluddin, Emerito Jose A Faraon, Jawad Fares, Farshad Farzadfar, Abdullah Hamid Feroze, Simone Ferrero, Lorenzo Ferro Desideri, Irina Filip, Florian Fischer, James L Fisher, Masoud Foroutan, Takeshi Fukumoto, Peter Andras Gaal, Mohamed M Gad, Muktar A Gadanya, Mariana Gaspar Fonseca, Mansour Ghafourifard, Nermin Ghith, Themba G Ginindza, Abraham Tamirat T Gizaw, James C Glasbey, Mahaveer Golechha, Ricardo Santiago Gomez, Sameer Vali Gopalani, Houman Goudarzi, Giuseppe Grosso, Mohammed Ibrahim Mohialdeen Gubari, Avirup Guha, D Sanjeeva Gunasekera, Bhawna Gupta, Veer Bala Gupta, Vivek Kumar Gupta, Reyna Alma Gutiérrez, Nima Hafezi-Nejad, Mohammad Rifat Haider, Rabih Halwani, Randah R Hamadeh, Sajid Hameed, Samer Hamidi, Asif Hanif, Shafiul Haque, Netanja I Harlianto, Josep Maria Haro, Ahmed I Hasaballah, Soheil Hassanipour, Roderick J Hay, Simon I Hay, Khezhar Hayat, Golnaz Heidari, Mohammad Heidari, Brenda Yuliana Herrera-Serna, Claudiu Herteliu, Kamal Hezam, Ramesh Holla, Md Mahbub Hossain, Mohammad-Salar Hosseini, Mehdi Hosseinzadeh, Mihaela Hostiuc, Mowafa Househ, Mohamed Hsairi, Fernando N Hugo, Rabia Hussain, Nawfal R Hussein, Bing-Fang Hwang, Segun Emmanuel Ibitoye, Fidelia Ida, Olayinka Stephen Ilesanmi, Irena M Ilic, Milena D Ilic, Lalu Muhammad Irham, Jessica Y Islam, Sheikh Mohammed Shariful Islam, Nahlah Elkudssiah Ismail, Gaetano Isola, Masao Iwagami, Louis Jacob, Vardhmaan Jain, Mihajlo Jakovljevic, Tahereh Javaheri, Shubha Jayaram, Seyed Behzad Jazayeri, Ravi Prakash Jha, Jost B Jonas, Tamas Joo, Nitin Joseph, Farahnaz Joukar, Mikko Jürisson, Ali Kabir, Danial Kahrizi, Leila R Kalankesh, Rohollah Kalhor, Feroze Kaliyadan, Yogeshwar Kalkonde, Nawzad Kameran Al-Salihi, Himal Kandel, Neeti Kapoor, André Karch, Srinivasa Vittal Katikireddi, Joonas H Kauppila, Taras Kavetsky, Sewnet Adem Kebede, Pedram Keshavarz, Yousef Saleh Khader, Rovshan Khalilov, Gulfaraz Khan, Maseer Khan, Md

Nuruzzaman Khan, Moien AB Khan, Young-Ho Khang, Amir M Khater, Maryam Khayamzadeh, Gyu Ri Kim, Yun Jin Kim, Adnan Kisa, Sezer Kisa, Katarzyna Kissimova-Skarbek, Jacek A Kopec, Rajasekaran Koteeswaran, Sindhura Lakshmi Koulmane Laxminarayana, Ai Koyanagi, Burcu Kucuk Bicer, Nuworza Kugbey, G Anil Kumar, Narinder Kumar, Nithin Kumar, Om P Kurmi, Tezer Kutluk, Carlo La Vecchia, Faris Hasan Lami, Paolo Lauriola, Sang-woong Lee, Shaun Wen Huey Lee, Wei-Chen Lee, Yo Han Lee, James Leigh, Elvynna Leong, Jiarui Li, Ming-Chieh Li, Xuefeng Liu, Joana A Loureiro, Muhammed Magdy Abd El Razek, Azeem Majeed, Alaa Makki, Ahmad Azam Malik, Mohammad Ali Mansournia, Santi Martini, Seyede Zahra Masoumi, Prashant Mathur, Martin McKee, Walter Mendoza, Ritesh G Menezes, Endalkachew Worku Mengesha, Mohamed Kamal Mesregah, Tomislav Mestrovic, Junmei Miao Jonasson, Tomasz Miagowski, Irmira Maria Michalek, Ted R Miller, Hamed Mirzaei, Hamid Reza Mirzaei, Sanjeev Misra, Prasanna Mithra, Masoud Moghadaszadeh, Yousef Mohammad, Mokhtar Mohammadi, Seyyede Momeneh Mohammadi, Abdollah Mohammadian-Hafshejani, Shafiu Mohammed, Nagabhishek Moka, Ali H Mokdad, Mariam Molokhia, Mohammad Ali Moni, Mohammad Amin Moosavi, Yousef Moradi, Joana Morgado-da-Costa, Sumaira Mubarik, Ahamarshan Jayaraman Nagarajan, Shankar Prasad Nagaraju, Mukhammad David Naimzada, Vinay Nangia, Atta Abbas Naqvi, Sreenivas Narasimha Swamy, Rawlance Ndejjo, Ionut Negoii, Serban Mircea Negru, Sandhya Neupane Kandel, Cuong Tat Nguyen, Huong Lan Thi Nguyen, Robina Khan Niazi, Chukwudi A Nnaji, Nurulamin M Noor, Chimezie Igwegbe Nzopotam, Bogdan Oancea, Chimedsuren Ochir, Oluwakemi Ololade Odukoya, Felix Akpojene Ogbo, Andrew T Olagunju, Babayemi Oluwaseun Olakunde, Emad Omar, Ahmed Omar Bali, Abidemi E Emmanuel Omonisi, Sokking Ong, Obinna E Onwujekwe, Hans Orru, Doris V Ortega-Altamirano, Nikita Otstavnov, Stanislav S Otstavnov, Mayowa O Owolabi, Mahesh P A, Jagadish Rao Padubidri, Adrian Pana, Demosthenes Panagiotakos, Songhomitra Panda-Jonas, Shahina Pardhan, Eun-Cheol Park, Eun-Kee Park, Harsh K Patel, Jenil R Patel, Siddhartha Pati, Sanjay M Pattanshetty, Uttam Paudel, David M Pereira, Renato B Pereira Pereira, Arokiasamy Perianayagam, Julian David Pillay, Saeed Pirouzpanah, Indrashis Podder, Maarten J Postma, Hadi Pourjafar, Akila Prashant, Liliana Preotescu, Mohammad Rabiee, Navid Rabiee, Amir Radfar, Venkatraman Radhakrishnan, Ata Rafiee, Fakher Rahim, Shadi Rahimzadeh, Mosiur Rahman, Muhammad Aziz Rahman, Amir Masoud Rahmani, Nazanin Rajai, Aashish Rajesh, Ivo Rakovac, Pradhun Ram, Kamal Ranabhat, Priyanga Ranasinghe, Chythra R Rao, Sowmya J Rao, Reza Rawassizadeh, Mohammad Sadegh Razeghinia, Andre M N Renzaho, Negar Rezaei, Nima Rezaei, Aziz Rezapour, Thomas J Roberts, Jefferson Antonio Buendia Rodriguez, Peter Rohloff, Gholamreza Roshandel, Godfrey M Rwegerera, Manjula S, Siamak Sabour, Basema Saddik, Umar Saeed, Harihar Sahoo, Sana Salehi, Marwa Rashad Salem, Hamideh Salimzadeh, Mehrnoosh Samaei, Abdallah M Samy, Juan Sanabria, Senthilkumar Sankararaman, Milena M Santric-Milicevic, Yaeesh Sardiwalla, Arash Sarveezad, Brijesh Sathian, Monika Sawhney, Mete Saylan, Ione Jayce Ceola Schneider, Mario Sekerija, Allen Seylani, Omid Shafaat, Zahra Shaghghi, Masood Ali Shaikh, Erfan Shamsoddin, Mohammed Shannawaz, Rajesh Sharma, Aziz Sheikh, Sara Sheikhbahaei, Jeevan K Shetty, Pavanchand H Shetty, Kenji Shibuya, K M Shivakumar, Velizar Shivarov, Soraya Siabani, Diego Augusto Santos Silva, Jasvinder A Singh, Yitagesu Sintayehu, Valentin Yurievich Skryabin, Anna Aleksandrovna Skryabina, Ahmad Sofi-Mahmudi, Houman Sotoudeh, Paschalis Steiropoulos, Kurt Straif, Ranjeeta Subedi, Mu'awiyah Babale Sufiyan, Iyad Sultan, Saima Sultana, Daniel Sur, Viktória Szerencsés, Miklós Szócska, Rafael Tabarés-Seisdedos, Hooman Tadbiri, Ken Takahashi, Iman M Talaat, Ker-Kan Tan, Vivian Y Tat, Bemnet Amare A Tedla, Yonas Getaye Tefera, Arash Tehrani-Banihashemi, Fisaha Haile Tesfay, Gizachew Assefa Tessema, Rekha Thapar, Aravind Thavamani, Viveksandeep Thoguluva Chandrasekar, Nihal Thomas, Hamid Reza Tohidinik, Mathilde Touvier, Marcos Roberto Tovani-Palone, Eugenio Traini, Bach Xuan Tran, Khanh Bao Tran, Mai Thi Ngoc Tran, Jaya Prasad Tripathy, Biruk Shalmeno Tusa, Irfan Ullah, Saif Ullah, Krishna Kishore Umapathi, Bhaskaran Unnikrishnan, Era Upadhyay, Marco Vacante, Maryam

Vaezi, Sahel Valadan Tahbaz, Diana Zuleika Velazquez, Francesco S Violante, Vasily Vlassov, Bay Vo, Victor Volovici, Giang Thu Vu, Yasir Waheed, Richard G Wamai, Paul Ward, Yi Feng Wen, Ronny Westerman, Andrea Sylvia Winkler, Seyed Hossein Yahyazadeh Jabbari, Lin Yang, Sanni Yaya, Taklo Simeneh Yazie Yazie, Yigizie Yeshaw, Naohiro Yonemoto, Mustafa Z Younis, Zabihollah Yousefi, Chuanhua Yu, Deniz Yuce, Ismaeel Yunusa, Vesna Zadnik, Fariba Zare, Mikhail Sergeevich Zastrozhin, Anasthasia Zastrozhina, Jianrong Zhang, Chenwen Zhong, Linghui Zhou, Cong Zhu, Arash Ziapour, Ivan R Zimmermann, and Christopher J L Murray.

### [Drafting the work or revising is critically for important intellectual content](#)

Jonathan M Kocarnik, Kelly Compton, Weijia Fu, Mohsen Abbasi-Kangevari, Hedayat Abbastabar, Sherief M Abd-Elsalam, Hassan Abidi, Hassan Abolhassani, Isaac Akinkunmi Adedeji, Shailesh M Advani, Muhammad Sohail Afzal, Mohammad Aghaali, Bright Opoku Ahinkorah, Sajjad Ahmad Ahmad, Ali Ahmadi, Sepideh Ahmadi, Gizachew Tadesse Akalu, Tayyaba Akram, Fares Alahdab, Motasem Alkhayyat, Amir Almasi-Hashiani, Nihad A Almasri, Sadeq Ali Ali Al-Maweri, Sami Almustanyir, Nivaldo Alonso, Nelson Alvis-Guzman, Hubert Amu, Robert Ancuceanu, Maxwell Hubert Antwi, Anayochukwu Edward Anyasodor, Jalal Arabloo, Morteza Arab-Zozani, Olatunde Aremu, Hany Ariffin, Timur Aripov, Judie Arulappan, Prince Atorkey, Avinash Aujayeb, Marcel Ausloos, Beatriz Paulina Ayala Quintanilla, Mohammed A Mohammed Azab, Sina Azadnajafabad, Amirhossein Azari Jafari, Ahmed Y Azzam, Atif Amin Baig, Jennifer L Baker, Senthilkumar Balakrishnan, Maciej Banach, Till Winfried Bärnighausen, Francesco Barone-Adesi, Fabio Barra, Amadou Barrow, Masoud Behzadifar, Uzma Iqbal Belgaumi, Woldesellassie M Mequanint Bezabhe, Yihienew Mequanint Bezabih, Akshaya Srikanth Bhagavathula, Sonu Bhaskar, Krittika Bhattacharyya, Vijayalakshmi S Bhojaraja, Sadia Bibi, Antonio Biondi, Catherine Bisignano, Tone Bjørge, Dejana Braithwaite, Amanpreet Brar, Hermann Brenner, Maria Teresa Bustamante-Teixeira, Nadeem Shafique Butt, Florentino Luciano Caetano dos Santos, Yin Cao, Ferrán Catalá-López, Francieli Cembranel, Ester Cerin, Soosanna Kumary Chattu, Vijay Kumar Chattu, Daniel Youngwhan Cho, Devasahayam J Christopher, Michael T Chung, Joao Conde, Paolo Angelo Cortesi, Vera Marisa Costa, Amanda Ramos Cunha, José das Neves, Fernando Pio De la Hoz, Asmamaw Bizuneh Demis, Edgar Denova-Gutiérrez, Deepak Dhamnetiya, Mandira Lamichhane Dhimal, Meghnath Dhimal, Mostafa Dianatinasab, Daniel Diaz, Huyen Phuc Do, Saeid Doaei, Francisco Winter dos Santos Figueiredo, Tim Robert Driscoll, Sahar Eftekhazadeh, Maha El Tantawi, Iffat Elbarazi, Muhammed Elhadi, Shaimaa I El-Jaafary, Sharareh Eskandarieh, Firooz Esmaeilzadeh, Arash Etemadi, Sayeh Ezzikouri, Mohammed Faisaluddin, Emerito Jose A Faraon, Jawad Fares, Abdullah Hamid Feroze, Simone Ferrero, Lorenzo Ferro Desideri, Irina Filip, Florian Fischer, James L Fisher, Masoud Foroutan, Takeshi Fukumoto, Mohamed M Gad, Muktar A Gadanya, Silvano Gallus, Abera Getachew Obsa, Mansour Ghafourifard, Nermin Ghith, Maryam Gholamalizadeh, Abraham Tamirat T Gizaw, James C Glasbey, Sameer Vali Gopalani, Giuseppe Gorini, Maximiliano Ribeiro Guerra, Avirup Guha, D Sanjeeva Gunasekera, Bhawna Gupta, Veer Bala Gupta, Vivek Kumar Gupta, Reyna Alma Gutiérrez, Nima Hafezi-Nejad, Rabih Halwani, Randah R Hamadeh, Sajid Hameed, Netanja I Harlianto, Josep Maria Haro, Ahmed I Hasaballah, Simon I Hay, Golnaz Heidari, Mohammad Heidari, Claudiu Herteliu, Kamal Hezam, Ramesh Holla, Md Mahbub Hossain, Mohammad Bellal Hossain Hossain, Mohammad-Salar Hosseini, Mostafa Hosseini, Sorin Hostiuc, Mowafa Househ, Junjie Huang, Fernando N Hugo, Rabia Hussain, Nawfal R Hussein, Ivo Iavicoli, Segun Emmanuel Ibitoye, Olayinka Stephen Ilesanmi, Irena M Ilic, Milena D Ilic, Jessica Y Islam, Rakibul M Islam, Sheikh Mohammed Shariful Islam, Nahlah Elkudssiah Ismail, Gaetano Isola, Masao Iwagami, Louis Jacob, Vardhman Jain, Mihajlo Jakovljevic, Shubha Jayaram, Ravi Prakash Jha, Jost B Jonas, Nitin Joseph, Mikk Jürisson, Ali Kabir, Danial Kahrizi, Feroze Kaliyadan, Ashwin Kamath, Himal Kandel, André Karch, Srinivasa Vittal Katikireddi, Joonas H Kauppila, Taras Kavetsky, Sewnet Adem Kebede, Pedram



Keshavarz, Mohammad Keykhaei, Yousef Saleh Khader, Rovshan Khalilov, Maseer Khan, Md Nuruzzaman Khan, Moien AB Khan, Amir M Khater, Gyu Ri Kim, Yun Jin Kim, Adnan Kisa, Sezer Kisa, Parvaiz A Koul, Sindhura Lakshmi Koulmane Laxminarayana, Ai Koyanagi, Nuworza Kugbey, Narinder Kumar, Om P Kurmi, Carlo La Vecchia, Iván Landires, Paolo Lauriola, Elvynna Leong, Joana A Loureiro, Raimundas Lunevicius, Muhammed Magdy Abd El Razek, Azeem Majeed, Shilpa Male, Ahmad Azam Malik, Ravi Mehrotra, Walter Mendoza, Ritesh G Menezes, Endalkachew Worku Mengesha, Mohamed Kamal Mesregah, Tomislav Mestrovic, Tomasz Miazgowski, Irmina Maria Michalek, Ted R Miller, Masoud Moghadaszadeh, Karzan Abdulmuhsin Mohammad, Yousef Mohammad, Shafiu Mohammed, Nagabhishek Moka, Ali H Mokdad, Mariam Molokhia, Lorenzo Monasta, Mohammad Ali Moni, Paula Moraga, Joana Morgado-da-Costa, Shane Douglas Morrison, Abbas Mosapour, Lillian Mwanri, Ahamarshan Jayaraman Nagarajan, Shankar Prasad Nagaraju, Chie Nagata, Mukhammad David Naimzada, Sreenivas Narasimha Swamy, Sabina O Nduaguba, Ionut Negoii, Serban Mircea Negru, Sandhya Neupane Kandel, Cuong Tat Nguyen, Huong Lan Thi Nguyen, Robina Khan Niazi, Nurulamin M Noor, Virginia Nuñez-Samudio, Chimezie Igwegbe Nzopotam, Oluwakemi Ololade Odukoya, Felix Akpojene Ogbo, Andrew T Olagunju, Abidemi E Emmanuel Omonisi, Obinna E Onwujekwe, Hans Orru, Doris V Ortega-Altamirano, Nikita Otstavnov, Stanislav S Otstavnov, Mayowa O Owolabi, Mahesh P A, Jagadish Rao Padubidri, Adrian Pana, Songhomitra Panda-Jonas, Shahina Pardhan, Eun-Cheol Park, Harsh K Patel, Jenil R Patel, Siddhartha Pati, Uttam Paudel, David M Pereira, Renato B Pereira Pereira, Julian David Pillay, Saeed Pirouzpanah, Farhad Pishgar, Indrashis Podder, Maarten J Postma, Liliana Preotescu, Mohammad Rabiee, Navid Rabiee, Amir Radfar, Venkatraman Radhakrishnan, Ata Rafiee, Fakher Rahim, Nazanin Rajai, Ivo Rakovac, Pradhun Ram, Kamal Ranabhat, Priyanga Ranasinghe, Chythra R Rao, Sowmya J Rao, Mohammad Sadegh Razeghinia, Andre M N Renzaho, Nima Rezaei, Thomas J Roberts, Jefferson Antonio Buendia Rodriguez, Peter Rohloff, Michele Romoli, Luca Ronfani, Godfrey M Rwegerera, Manjula S, Basema Saddik, Umar Saeed, Amirhossein Sahebkar, Marwa Rashad Salem, Hamideh Salimzadeh, Mehrnoosh Samaei, Abdallah M Samy, Juan Sanabria, Milena M Santric-Milicevic, Yaeesh Sardiwalla, Mete Saylan, Ione Jayce Ceola Schneider, Mario Sekerija, Allen Seylani, Omid Shafaat, Erfan Shamsoddin, Mohammed Shannawaz, Rajesh Sharma, Aziz Sheikh, Sara Sheikhabaehi, Jeevan K Shetty, Pavanchand H Shetty, Kenji Shibuya, Reza Shirkoohi, K M Shivakumar, Sudeep K Siddappa Malleshappa, Diego Augusto Santos Silva, Jasvinder A Singh, Valentin Yurievich Skryabin, Anna Aleksandrovna Skryabina, Ahmad Sofi-Mahmudi, Paschalis Steiropoulos, Ranjeeta Subedi, Mu'awiyyah Babale Sufiyan, Iyad Sultan, Saima Sultana, Takahiro Tabuchi, Hooman Tadbiri, Iman M Talaat, Ker-Kan Tan, Vivian Y Tat, Yonas Getaye Tefera, Mohamad-Hani Temsah, Gizachew Assefa Tessema, Viveksandeeep Thoguluva Chandrasekar, Nihal Thomas, Hamid Reza Tohidinik, Mathilde Touvier, Marcos Roberto Tovani-Palone, Bach Xuan Tran, Jaya Prasad Tripathy, Biruk Shalmeno Tusa, Irfan Ullah, Saif Ullah, Krishna Kishore Umapathi, Bhaskaran Unnikrishnan, Era Upadhyay, Marco Vacante, Sahel Valadan Tahbaz, Diana Zuleika Velazquez, Massimiliano Veroux, Francesco S Violante, Vasily Vlassov, Victor Volovici, Giang Thu Vu, Yasir Waheed, Richard G Wamai, Paul Ward, Ronny Westerman, Andrea Sylvia Winkler, Lalit Yadav, Seyed Hossein Yahyazadeh Jabbari, Lin Yang, Sanni Yaya, Yigizie Yeshaw, Naohiro Yonemoto, Mustafa Z Younis, Deniz Yuce, Mikhail Sergeevich Zastrozhin, Anasthasia Zastrozhina, Jianrong Zhang, Chenwen Zhong, Arash Ziapour, Ivan R Zimmermann, and Christopher J L Murray.

#### [Extracting, cleaning, or cataloging data; designing or coding figures and tables](#)

Jonathan M Kocarnik, Hassan Abidi, Ali Ahmadi, Hubert Amu, Amirhossein Azari Jafari, Mostafa Dianatinasab, Saeid Doaei, Takeshi Fukumoto, Mansour Ghafourifard, Ahmed I Hasaballah, Mohammad Heidari, Mowafa Househ, Danial Kahrizi, Taras Kavetsky, Rovshan Khalilov, Masoud Moghadaszadeh, Ali H Mokdad, Abdallah M Samy, Saif Ullah, and Arash Ziapour.

Managing the overall research enterprise

Jonathan M Kocarnik, Kelly Compton, Lalit Dandona, Simon I Hay, Ali H Mokdad, and Christopher J L Murray.

## Supplementary Tables and Figures

eTable 1: Number of site-years for cancer mortality data by source type, for GBD 2019 compared to GBD 2017

| Cause                                   | VR<br>GBD<br>2017 | VR<br>GBD<br>2019 | VR<br>change<br>GBD<br>2017<br>to GBD<br>2019 | VA<br>GBD<br>2017 | VA<br>GBD<br>2019 | VA<br>change<br>GBD<br>2017<br>to GBD<br>2019 | CR<br>GBD<br>2017 | CR<br>GBD<br>2019 | CR<br>change<br>GBD<br>2017<br>to GBD<br>2019 | Total<br>GBD<br>2017 | Total<br>GBD<br>2019 | Total<br>Change<br>GBD<br>2017<br>to GBD<br>2019 |
|-----------------------------------------|-------------------|-------------------|-----------------------------------------------|-------------------|-------------------|-----------------------------------------------|-------------------|-------------------|-----------------------------------------------|----------------------|----------------------|--------------------------------------------------|
| All malignant neoplasms (total)         | 656 430           | 767 514           | 16.9                                          | 6 900             | 6 137             | -11.1                                         | 129 641           | 155 542           | 20.0                                          | 819 127              | 929 193              | 13.4                                             |
| All malignant neoplasms (unique)        | 20 120            | 23 378            | 16.2                                          | 491               | 541               | 10.2                                          | 5 545             | 5 385             | -2.9                                          | 26 156               | 29 304               | 12.0                                             |
| Acute lymphoid leukemia                 | 16 763            | 19 427            | 15.9                                          | NA                | NA                | NA                                            | 1 672             | 2 329             | 39.3                                          | 18 435               | 21 756               | 18.0                                             |
| Acute myeloid leukemia                  | 16 763            | 19 430            | 15.9                                          | NA                | NA                | NA                                            | 2 490             | 3 122             | 25.4                                          | 19 253               | 22 552               | 17.1                                             |
| Bladder cancer                          | 19 320            | 22 559            | 16.8                                          | NA                | NA                | NA                                            | 4 279             | 5 146             | 20.3                                          | 23 599               | 27 705               | 17.4                                             |
| Brain and central nervous system cancer | 19 321            | 22 560            | 16.8                                          | 427               | 535               | 25.3                                          | 4 478             | 5 311             | 18.6                                          | 24 226               | 28 406               | 17.3                                             |
| Breast cancer                           | 19 618            | 23 378            | 19.2                                          | 678               | 515               | -24.0                                         | 4 458             | 5 333             | 19.6                                          | 24 754               | 29 226               | 18.1                                             |
| Cervical cancer                         | 19 618            | 22 849            | 16.5                                          | 370               | 182               | -50.8                                         | 4 378             | 4 971             | 13.5                                          | 24 366               | 28 002               | 14.9                                             |
| Chronic lymphoid leukemia               | 16 763            | 19 105            | 14.0                                          | NA                | NA                | NA                                            | 1 651             | 1 062             | -35.7                                         | 18 414               | 20 167               | 9.5                                              |
| Chronic myeloid leukemia                | 16 763            | 19 247            | 14.8                                          | NA                | NA                | NA                                            | 1 664             | 2 291             | 37.7                                          | 18 427               | 21 538               | 16.9                                             |
| Colon and rectum cancer                 | 19 618            | 22 849            | 16.5                                          | 660               | 516               | -21.8                                         | 4 474             | 5 349             | 19.6                                          | 24 752               | 28 714               | 16.0                                             |
| Esophageal cancer                       | 19 614            | 22 845            | 16.5                                          | 648               | 514               | -20.7                                         | 4 453             | 5 288             | 18.8                                          | 24 715               | 28 647               | 15.9                                             |
| Gallbladder and biliary tract cancer    | 18 771            | 22 023            | 17.3                                          | NA                | NA                | NA                                            | 4 400             | 5 230             | 18.9                                          | 23 171               | 27 253               | 17.6                                             |
| Hodgkin lymphoma                        | 19 319            | 22 558            | 16.8                                          | NA                | NA                | NA                                            | 4 439             | 5 295             | 19.3                                          | 23 758               | 27 853               | 17.2                                             |
| Kidney cancer                           | 19 318            | 22 557            | 16.8                                          | NA                | NA                | NA                                            | 4 342             | 5 182             | 19.3                                          | 23 660               | 27 739               | 17.2                                             |
| Larynx cancer                           | 19 614            | 22 845            | 16.5                                          | 374               | 183               | -51.1                                         | 4 456             | 5 292             | 18.8                                          | 24 444               | 28 320               | 15.9                                             |
| Leukemia                                | 19 617            | 23 377            | 19.2                                          | 584               | 187               | -68.0                                         | 4 462             | 5 319             | 19.2                                          | 24 663               | 28 883               | 17.1                                             |
| Lip and oral cavity cancer              | 19 322            | 22 559            | 16.8                                          | 638               | 514               | -19.4                                         | 4 315             | 4 498             | 4.2                                           | 24 275               | 27 571               | 13.6                                             |
| Liver cancer                            | 19 334            | 22 846            | 18.2                                          | 374               | 539               | 44.1                                          | 4 464             | 5 320             | 19.2                                          | 24 172               | 28 705               | 18.8                                             |
| Malignant skin melanoma                 | 19 322            | 22 559            | 16.8                                          | NA                | NA                | NA                                            | 4 351             | 5 266             | 21.0                                          | 23 673               | 27 825               | 17.5                                             |
| Mesothelioma                            | 10 944            | 13 387            | 22.3                                          | NA                | NA                | NA                                            | 0                 | 3 362             | 100.0                                         | 10 944               | 16 749               | 53.0                                             |
| Multiple myeloma                        | 19 318            | 21 929            | 13.5                                          | NA                | NA                | NA                                            | 4 426             | 5 227             | 18.1                                          | 23 744               | 27 156               | 14.4                                             |

|                                                    |        |        |      |     |     |        |       |       |       |        |        |      |
|----------------------------------------------------|--------|--------|------|-----|-----|--------|-------|-------|-------|--------|--------|------|
| Nasopharynx cancer                                 | 19 320 | 22 557 | 16.8 | NA  | NA  | NA     | 4 411 | 5 247 | 19.0  | 23 731 | 27 804 | 17.2 |
| Non-Hodgkin lymphoma                               | 19 321 | 22 846 | 18.2 | NA  | 539 | 100.0  | 4 468 | 5 335 | 19.4  | 23 789 | 28 720 | 20.7 |
| Non-melanoma skin cancer                           | 19 329 | 22 557 | 16.7 | NA  | NA  | NA     | NA    | NA    | NA    | 19 329 | 22 557 | 16.7 |
| Non-melanoma skin cancer (squamous-cell carcinoma) | 18 772 | 22 024 | 17.3 | NA  | NA  | NA     | NA    | NA    | NA    | 18 772 | 22 024 | 17.3 |
| Other leukemia                                     | 16 765 | 19 776 | 18.0 | 210 | 0   | -100.0 | 3 935 | 3 096 | -21.3 | 20 910 | 22 872 | 9.4  |
| Other malignant neoplasms                          | 19 376 | 22 848 | 17.9 | NA  | 540 | 100.0  | 3 140 | 5 368 | 71.0  | 22 516 | 28 756 | 27.7 |
| Other pharynx cancer                               | 19 320 | 22 557 | 16.8 | 374 | 186 | -50.3  | 4 404 | 5 169 | 17.4  | 24 098 | 27 912 | 15.8 |
| Ovarian cancer                                     | 19 318 | 22 557 | 16.8 | NA  | NA  | NA     | 4 455 | 5 007 | 12.4  | 23 773 | 27 564 | 15.9 |
| Pancreatic cancer                                  | 19 321 | 22 560 | 16.8 | NA  | NA  | NA     | 4 472 | 5 295 | 18.4  | 23 793 | 27 855 | 17.1 |
| Prostate cancer                                    | 19 615 | 22 846 | 16.5 | NA  | NA  | NA     | 4 455 | 4 965 | 11.4  | 24 070 | 27 811 | 15.5 |
| Stomach cancer                                     | 19 618 | 22 849 | 16.5 | 374 | 187 | -50.0  | 4 474 | 5 312 | 18.7  | 24 466 | 28 348 | 15.9 |
| Testicular cancer                                  | 18 774 | 21 866 | 16.5 | 160 | 301 | 88.1   | 4 425 | 4 959 | 12.1  | 23 359 | 27 126 | 16.1 |
| Thyroid cancer                                     | 19 319 | 22 558 | 16.8 | NA  | NA  | NA     | 4 457 | 5 328 | 19.5  | 23 776 | 27 886 | 17.3 |
| Tracheal, bronchus, and lung cancer                | 19 618 | 23 378 | 19.2 | 655 | 516 | -21.2  | 4 459 | 5 318 | 19.3  | 24 732 | 29 212 | 18.1 |
| Uterine cancer                                     | 19 604 | 22 846 | 16.5 | 374 | 183 | -51.1  | 4 434 | 4 950 | 11.6  | 24 412 | 27 979 | 14.6 |

Abbreviations: CR, cancer registry; GBD, Global Burden of Disease Study; NA, not applicable; VA, verbal autopsy; VR, vital registration.

Footnote: NA indicates that either no data were available, or that data are not considered reliable for the cancer type. For “All malignant neoplasms,” the “total” row provides the sum of all cancer-specific rows, while the “unique” row is the number of unique site-years of data regardless of cancer type.

*eTable 2: Socio-demographic Index groupings by geography, based on 2019 values*

| <b>Country Name</b>              | <b>SDI Quintile</b> |
|----------------------------------|---------------------|
| Afghanistan                      | Low SDI             |
| Albania                          | Middle SDI          |
| Algeria                          | Middle SDI          |
| American Samoa                   | High-middle SDI     |
| Andorra                          | High SDI            |
| Angola                           | Low-middle SDI      |
| Antigua and Barbuda              | High-middle SDI     |
| Argentina                        | High-middle SDI     |
| Armenia                          | Middle SDI          |
| Australia                        | High SDI            |
| Austria                          | High SDI            |
| Azerbaijan                       | Middle SDI          |
| Bahamas                          | High-middle SDI     |
| Bahrain                          | High-middle SDI     |
| Bangladesh                       | Low-middle SDI      |
| Barbados                         | High-middle SDI     |
| Belarus                          | High-middle SDI     |
| Belgium                          | High SDI            |
| Belize                           | Low-middle SDI      |
| Benin                            | Low SDI             |
| Bermuda                          | High SDI            |
| Bhutan                           | Low-middle SDI      |
| Bolivia (Plurinational State of) | Low-middle SDI      |
| Bosnia and Herzegovina           | High-middle SDI     |
| Botswana                         | Middle SDI          |
| Brazil                           | Middle SDI          |
| Brunei Darussalam                | High SDI            |
| Bulgaria                         | High-middle SDI     |
| Burkina Faso                     | Low SDI             |
| Burundi                          | Low SDI             |
| Cabo Verde                       | Low-middle SDI      |
| Cambodia                         | Low-middle SDI      |
| Cameroon                         | Low-middle SDI      |
| Canada                           | High SDI            |
| Central African Republic         | Low SDI             |
| Chad                             | Low SDI             |
| Chile                            | High-middle SDI     |
| China                            | Middle SDI          |
| Colombia                         | Middle SDI          |
| Comoros                          | Low SDI             |
| Congo                            | Low-middle SDI      |

|                                       |                 |
|---------------------------------------|-----------------|
| Cook Islands                          | High-middle SDI |
| Costa Rica                            | Middle SDI      |
| Croatia                               | High-middle SDI |
| Cuba                                  | Middle SDI      |
| Cyprus                                | High SDI        |
| Czechia                               | High SDI        |
| Côte d'Ivoire                         | Low SDI         |
| Democratic People's Republic of Korea | Low-middle SDI  |
| Democratic Republic of the Congo      | Low SDI         |
| Denmark                               | High SDI        |
| Djibouti                              | Low-middle SDI  |
| Dominica                              | High-middle SDI |
| Dominican Republic                    | Low-middle SDI  |
| Ecuador                               | Middle SDI      |
| Egypt                                 | Middle SDI      |
| El Salvador                           | Low-middle SDI  |
| Equatorial Guinea                     | Middle SDI      |
| Eritrea                               | Low SDI         |
| Estonia                               | High SDI        |
| Eswatini                              | Low-middle SDI  |
| Ethiopia                              | Low SDI         |
| Fiji                                  | Middle SDI      |
| Finland                               | High SDI        |
| France                                | High SDI        |
| Gabon                                 | Middle SDI      |
| Gambia                                | Low SDI         |
| Georgia                               | High-middle SDI |
| Germany                               | High SDI        |
| Ghana                                 | Low-middle SDI  |
| Greece                                | High-middle SDI |
| Greenland                             | High-middle SDI |
| Grenada                               | Middle SDI      |
| Guam                                  | High SDI        |
| Guatemala                             | Low-middle SDI  |
| Guinea                                | Low SDI         |
| Guinea-Bissau                         | Low SDI         |
| Guyana                                | Middle SDI      |
| Haiti                                 | Low SDI         |
| Honduras                              | Low-middle SDI  |
| Hungary                               | High-middle SDI |
| Iceland                               | High SDI        |
| India                                 | Low-middle SDI  |
| Indonesia                             | Middle SDI      |

|                                  |                 |
|----------------------------------|-----------------|
| Iran (Islamic Republic of)       | Middle SDI      |
| Iraq                             | Middle SDI      |
| Ireland                          | High SDI        |
| Israel                           | High-middle SDI |
| Italy                            | High-middle SDI |
| Jamaica                          | Middle SDI      |
| Japan                            | High SDI        |
| Jordan                           | High-middle SDI |
| Kazakhstan                       | High-middle SDI |
| Kenya                            | Low-middle SDI  |
| Kiribati                         | Low-middle SDI  |
| Kuwait                           | High SDI        |
| Kyrgyzstan                       | Low-middle SDI  |
| Lao People's Democratic Republic | Low-middle SDI  |
| Latvia                           | High SDI        |
| Lebanon                          | High-middle SDI |
| Lesotho                          | Low-middle SDI  |
| Liberia                          | Low SDI         |
| Libya                            | High-middle SDI |
| Lithuania                        | High SDI        |
| Luxembourg                       | High SDI        |
| Madagascar                       | Low SDI         |
| Malawi                           | Low SDI         |
| Malaysia                         | High-middle SDI |
| Maldives                         | Low-middle SDI  |
| Mali                             | Low SDI         |
| Malta                            | High-middle SDI |
| Marshall Islands                 | Low-middle SDI  |
| Mauritania                       | Low-middle SDI  |
| Mauritius                        | High-middle SDI |
| Mexico                           | Middle SDI      |
| Micronesia (Federated States of) | Low-middle SDI  |
| Monaco                           | High SDI        |
| Mongolia                         | Low-middle SDI  |
| Montenegro                       | High-middle SDI |
| Morocco                          | Low-middle SDI  |
| Mozambique                       | Low SDI         |
| Myanmar                          | Low-middle SDI  |
| Namibia                          | Middle SDI      |
| Nauru                            | Middle SDI      |
| Nepal                            | Low SDI         |
| Netherlands                      | High SDI        |
| New Zealand                      | High SDI        |

|                                  |                 |
|----------------------------------|-----------------|
| Nicaragua                        | Low-middle SDI  |
| Niger                            | Low SDI         |
| Nigeria                          | Low-middle SDI  |
| Niue                             | High-middle SDI |
| North Macedonia                  | High-middle SDI |
| Northern Mariana Islands         | High-middle SDI |
| Norway                           | High SDI        |
| Oman                             | High-middle SDI |
| Pakistan                         | Low SDI         |
| Palau                            | High-middle SDI |
| Palestine                        | Low-middle SDI  |
| Panama                           | Middle SDI      |
| Papua New Guinea                 | Low SDI         |
| Paraguay                         | Middle SDI      |
| Peru                             | Middle SDI      |
| Philippines                      | Middle SDI      |
| Poland                           | High-middle SDI |
| Portugal                         | High-middle SDI |
| Puerto Rico                      | High SDI        |
| Qatar                            | High SDI        |
| Republic of Korea                | High SDI        |
| Republic of Moldova              | High-middle SDI |
| Romania                          | High-middle SDI |
| Russian Federation               | High-middle SDI |
| Rwanda                           | Low SDI         |
| Saint Kitts and Nevis            | High-middle SDI |
| Saint Lucia                      | Middle SDI      |
| Saint Vincent and the Grenadines | Middle SDI      |
| Samoa                            | Middle SDI      |
| San Marino                       | High SDI        |
| São Tomé and Príncipe            | Low-middle SDI  |
| Saudi Arabia                     | High SDI        |
| Senegal                          | Low SDI         |
| Serbia                           | High-middle SDI |
| Seychelles                       | High-middle SDI |
| Sierra Leone                     | Low SDI         |
| Singapore                        | High SDI        |
| Slovakia                         | High SDI        |
| Slovenia                         | High SDI        |
| Solomon Islands                  | Low SDI         |
| Somalia                          | Low SDI         |
| South Africa                     | Middle SDI      |
| South Sudan                      | Low SDI         |



|                                    |                 |
|------------------------------------|-----------------|
| Spain                              | High-middle SDI |
| Sri Lanka                          | High-middle SDI |
| Sudan                              | Low-middle SDI  |
| Suriname                           | Middle SDI      |
| Sweden                             | High SDI        |
| Switzerland                        | High SDI        |
| Syrian Arab Republic               | Middle SDI      |
| Taiwan (Province of China)         | High SDI        |
| Tajikistan                         | Low-middle SDI  |
| Thailand                           | Middle SDI      |
| Timor-Leste                        | Low-middle SDI  |
| Togo                               | Low SDI         |
| Tokelau                            | Middle SDI      |
| Tonga                              | Middle SDI      |
| Trinidad and Tobago                | High-middle SDI |
| Tunisia                            | Middle SDI      |
| Turkey                             | High-middle SDI |
| Turkmenistan                       | Middle SDI      |
| Tuvalu                             | Low-middle SDI  |
| Uganda                             | Low SDI         |
| Ukraine                            | High-middle SDI |
| United Arab Emirates               | High SDI        |
| United Kingdom                     | High SDI        |
| United Republic of Tanzania        | Low SDI         |
| United States Virgin Islands       | High-middle SDI |
| United States of America           | High SDI        |
| Uruguay                            | High-middle SDI |
| Uzbekistan                         | Middle SDI      |
| Vanuatu                            | Low-middle SDI  |
| Venezuela (Bolivarian Republic of) | Low-middle SDI  |
| Viet Nam                           | Middle SDI      |
| Yemen                              | Low SDI         |
| Zambia                             | Low-middle SDI  |
| Zimbabwe                           | Low-middle SDI  |

eTable 3: List of International Classification of Diseases (ICD) codes mapped to the Global Burden of Disease cause list for cancer incidence data

| Cause                                | ICCC3       | ICD-10                                                                                                                                                                                                                                                                                                                                              | ICD-9                                                                                                                                                                                                                                                                                                                                     |
|--------------------------------------|-------------|-----------------------------------------------------------------------------------------------------------------------------------------------------------------------------------------------------------------------------------------------------------------------------------------------------------------------------------------------------|-------------------------------------------------------------------------------------------------------------------------------------------------------------------------------------------------------------------------------------------------------------------------------------------------------------------------------------------|
| Lip and oral cavity cancer           | Xlf1        | C00, C00.0, C00.1, C00.2, C00.3, C00.4, C00.5, C00.6, C00.8, C00.9, C01, C01.9, C02, C02.0, C02.1, C02.2, C02.3, C02.4, C02.8, C02.9, C03, C03.0, C03.1, C03.9, C04, C04.0, C04.1, C04.8, C04.9, C05, C05.0, C05.1, C05.2, C05.8, C05.9, C06, C06.0, C06.1, C06.2, C06.8, C06.80, C06.89, C06.9, C07, C07.0, C07.9, C08, C08.0, C08.1, C08.8, C08.9 | 140, 140.0, 140.1, 140.2, 140.3, 140.4, 140.5, 140.6, 140.7, 140.8, 140.9, 141, 141.0, 141.1, 141.2, 141.3, 141.4, 141.5, 141.6, 141.8, 141.9, 142, 142.0, 142.1, 142.2, 142.3, 142.8, 142.9, 143, 143.0, 143.1, 143.8, 143.9, 144, 144.0, 144.1, 144.4, 144.8, 144.9, 145, 145.0, 145.1, 145.2, 145.3, 145.4, 145.5, 145.6, 145.8, 145.9 |
| Nasopharynx cancer                   | Xlc         | C11, C11.0, C11.1, C11.2, C11.3, C11.8, C11.9                                                                                                                                                                                                                                                                                                       | 147, 147.0, 147.1, 147.2, 147.3, 147.8, 147.9                                                                                                                                                                                                                                                                                             |
| Other pharynx cancer                 | NA          | C09, C09.0, C09.1, C09.8, C09.9, C1, C10, C10.0, C10.1, C10.2, C10.3, C10.4, C10.8, C10.9, C12, C12.0, C12.9, C13, C13.0, C13.1, C13.2, C13.8, C13.9                                                                                                                                                                                                | 146, 146.0, 146.1, 146.2, 146.3, 146.4, 146.5, 146.6, 146.7, 146.8, 146.9, 148, 148.0, 148.1, 148.2, 148.3, 148.4, 148.5, 148.8, 148.9                                                                                                                                                                                                    |
| Esophageal cancer                    | NA          | C15, C15.0, C15.1, C15.2, C15.3, C15.4, C15.5, C15.8, C15.9                                                                                                                                                                                                                                                                                         | 150, 150.0, 150.1, 150.2, 150.3, 150.4, 150.5, 150.6, 150.7, 150.8, 150.9                                                                                                                                                                                                                                                                 |
| Stomach cancer                       | NA          | C16, C16.0, C16.1, C16.2, C16.3, C16.4, C16.5, C16.6, C16.7, C16.8, C16.9                                                                                                                                                                                                                                                                           | 151, 151.0, 151.1, 151.2, 151.3, 151.4, 151.5, 151.6, 151.8, 151.9, 209.23                                                                                                                                                                                                                                                                |
| Colon and rectum cancer              | Xlf2, Xlf3  | C18, C18.0, C18.1, C18.2, C18.3, C18.4, C18.5, C18.6, C18.7, C18.8, C18.9, C19, C19.0, C19.9, C2, C20, C20.0, C20.8, C20.9, C21, C21.0, C21.1, C21.2, C21.8, C21.9                                                                                                                                                                                  | 153, 153.0, 153.1, 153.2, 153.3, 153.4, 153.5, 153.6, 153.7, 153.8, 153.9, 154, 154.0, 154.1, 154.2, 154.3, 154.4, 154.8, 154.9, 209.1, 209.10, 209.11, 209.12, 209.13, 209.14, 209.15, 209.16, 209.17, 569.0, 569.43, 569.44, 569.84, 569.85                                                                                             |
| Liver cancer                         | VIIb, VIIc  | C22, C22.0, C22.1, C22.3, C22.4, C22.5, C22.7, C22.8                                                                                                                                                                                                                                                                                                | 155, 155.0, 155.1, 155.3, 155.5, 155.9                                                                                                                                                                                                                                                                                                    |
| Gallbladder and biliary tract cancer | NA          | C23, C23.0, C23.9, C24, C24.0, C24.1, C24.4, C24.8, C24.9                                                                                                                                                                                                                                                                                           | 156, 156.0, 156.1, 156.2, 156.3, 156.8, 156.9                                                                                                                                                                                                                                                                                             |
| Pancreatic cancer                    | XIIa2       | C25, C25.0, C25.1, C25.2, C25.3, C25.4, C25.7, C25.8, C25.9                                                                                                                                                                                                                                                                                         | 157, 157.0, 157.1, 157.2, 157.3, 157.4, 157.5, 157.7, 157.8, 157.9                                                                                                                                                                                                                                                                        |
| Larynx cancer                        | NA          | C32, C32.0, C32.1, C32.2, C32.3, C32.8, C32.9                                                                                                                                                                                                                                                                                                       | 161, 161.0, 161.1, 161.2, 161.3, 161.8, 161.9                                                                                                                                                                                                                                                                                             |
| Tracheal, bronchus, and lung cancer  | XIIa3, Xlf4 | C33, C33.0, C33.2, C33.9, C34, C34.0, C34.00, C34.01, C34.02, C34.1, C34.10, C34.11, C34.12, C34.2, C34.3, C34.30, C34.31, C34.32, C34.4, C34.7, C34.8, C34.80, C34.81, C34.82, C34.9, C34.90, C34.91, C34.92                                                                                                                                       | 162, 162.0, 162.1, 162.2, 162.3, 162.4, 162.5, 162.8, 162.9, 209.21                                                                                                                                                                                                                                                                       |

|                          |                                           |                                                                                                                                                                                                                                                                                                                                                                                                                                                                                                                                                                                                                                                                                                                                 |                                                                                                                                                                                                                                                                                                                      |
|--------------------------|-------------------------------------------|---------------------------------------------------------------------------------------------------------------------------------------------------------------------------------------------------------------------------------------------------------------------------------------------------------------------------------------------------------------------------------------------------------------------------------------------------------------------------------------------------------------------------------------------------------------------------------------------------------------------------------------------------------------------------------------------------------------------------------|----------------------------------------------------------------------------------------------------------------------------------------------------------------------------------------------------------------------------------------------------------------------------------------------------------------------|
| Malignant skin melanoma  | XId                                       | C43, C43.0, C43.1, C43.10, C43.11, C43.12, C43.2, C43.20, C43.21, C43.22, C43.3, C43.30, C43.31, C43.39, C43.4, C43.5, C43.51, C43.52, C43.59, C43.6, C43.60, C43.61, C43.62, C43.7, C43.70, C43.71, C43.72, C43.8, C43.9                                                                                                                                                                                                                                                                                                                                                                                                                                                                                                       | 172, 172.0, 172.1, 172.2, 172.3, 172.4, 172.5, 172.6, 172.7, 172.8, 172.9                                                                                                                                                                                                                                            |
| Non-melanoma skin cancer | XIe                                       | C44.0, C44.00, C44.09, C44.1, C44.10, C44.101, C44.102, C44.109, C44.19, C44.191, C44.192, C44.199, C44.2, C44.20, C44.201, C44.202, C44.209, C44.29, C44.291, C44.292, C44.299, C44.3, C44.30, C44.300, C44.301, C44.309, C44.39, C44.390, C44.391, C44.399, C44.4, C44.40, C44.41, C44.42, C44.49, C44.5, C44.50, C44.500, C44.501, C44.509, C44.590, C44.591, C44.599, C44.6, C44.60, C44.601, C44.602, C44.609, C44.69, C44.691, C44.692, C44.699, C44.7, C44.70, C44.701, C44.702, C44.709, C44.79, C44.791, C44.792, C44.799, C44.8, C44.80, C44.89, C44.9, C44.99                                                                                                                                                        | 173, 173.0, 173.00, 173.09, 173.1, 173.10, 173.19, 173.2, 173.20, 173.29, 173.3, 173.30, 173.39, 173.4, 173.40, 173.49, 173.5, 173.50, 173.59, 173.6, 173.60, 173.69, 173.7, 173.70, 173.79, 173.8, 173.80, 173.89, 173.9, 173.90, 173.99, 232, 232.0, 232.1, 232.2, 232.3, 232.4, 232.5, 232.6, 232.7, 232.8, 232.9 |
| Breast cancer            | XIf6                                      | C50, C50.0, C50.01, C50.011, C50.012, C50.019, C50.02, C50.021, C50.022, C50.029, C50.1, C50.11, C50.111, C50.112, C50.119, C50.12, C50.121, C50.122, C50.129, C50.2, C50.21, C50.211, C50.212, C50.219, C50.22, C50.221, C50.222, C50.229, C50.3, C50.31, C50.311, C50.312, C50.319, C50.32, C50.321, C50.322, C50.329, C50.4, C50.41, C50.411, C50.412, C50.419, C50.42, C50.421, C50.422, C50.429, C50.5, C50.51, C50.511, C50.512, C50.519, C50.52, C50.521, C50.522, C50.529, C50.6, C50.61, C50.611, C50.612, C50.619, C50.62, C50.621, C50.622, C50.629, C50.7, C50.8, C50.81, C50.811, C50.812, C50.819, C50.82, C50.821, C50.822, C50.829, C50.9, C50.91, C50.911, C50.912, C50.919, C50.92, C50.921, C50.922, C50.929 | 174, 174.0, 174.1, 174.2, 174.3, 174.4, 174.5, 174.6, 174.8, 174.9, 175, 175.0, 175.3, 175.9, 610, 610.0, 610.1, 610.2, 610.3, 610.4, 610.8, 610.9                                                                                                                                                                   |
| Cervical cancer          | XIf7                                      | C53, C53.0, C53.1, C53.3, C53.4, C53.8, C53.9                                                                                                                                                                                                                                                                                                                                                                                                                                                                                                                                                                                                                                                                                   | 180, 180.0, 180.1, 180.2, 180.3, 180.4, 180.5, 180.6, 180.8, 180.9, 622.1, 622.10, 622.11, 622.12, 622.2, 622.7                                                                                                                                                                                                      |
| Uterine cancer           | NA                                        | C54, C54.0, C54.1, C54.2, C54.3, C54.4, C54.8, C54.9                                                                                                                                                                                                                                                                                                                                                                                                                                                                                                                                                                                                                                                                            | 182, 182.0, 182.1, 182.8, 182.9                                                                                                                                                                                                                                                                                      |
| Ovarian cancer           | NA                                        | C56, C56.0, C56.1, C56.2, C56.4, C56.9                                                                                                                                                                                                                                                                                                                                                                                                                                                                                                                                                                                                                                                                                          | 183, 183.0                                                                                                                                                                                                                                                                                                           |
| Prostate cancer          | NA                                        | C61, C61.0, C61.9                                                                                                                                                                                                                                                                                                                                                                                                                                                                                                                                                                                                                                                                                                               | 185, 185.0, 185.9                                                                                                                                                                                                                                                                                                    |
| Testicular cancer        | NA                                        | C62, C62.0, C62.00, C62.01, C62.02, C62.1, C62.10, C62.11, C62.12, C62.9, C62.90, C62.91, C62.92                                                                                                                                                                                                                                                                                                                                                                                                                                                                                                                                                                                                                                | 186, 186.0, 186.9                                                                                                                                                                                                                                                                                                    |
| Kidney cancer            | VI, VIa, VIa1, VIa2, VIa3, VIa4, VIb, VIc | C64, C64.0, C64.1, C64.2, C64.4, C64.5, C64.6, C64.8, C64.9, C65, C65.0, C65.1, C65.2, C65.9                                                                                                                                                                                                                                                                                                                                                                                                                                                                                                                                                                                                                                    | 189.0, 189.1, 189.5, 189.6, 209.24                                                                                                                                                                                                                                                                                   |

|                                 |                                                                                                                                                                                                                                                                                                                                                                                                                                                                                                                                                                                                                                                                                                                                                                                                                                                             |                                                                                                                                                                                                                                                                                                                                                                                                                                                                                                                                                                                                                                                           |                                                                                                                                                                                                                                                                                                                                                                                                                                                                                                                                                                                                                                                             |
|---------------------------------|-------------------------------------------------------------------------------------------------------------------------------------------------------------------------------------------------------------------------------------------------------------------------------------------------------------------------------------------------------------------------------------------------------------------------------------------------------------------------------------------------------------------------------------------------------------------------------------------------------------------------------------------------------------------------------------------------------------------------------------------------------------------------------------------------------------------------------------------------------------|-----------------------------------------------------------------------------------------------------------------------------------------------------------------------------------------------------------------------------------------------------------------------------------------------------------------------------------------------------------------------------------------------------------------------------------------------------------------------------------------------------------------------------------------------------------------------------------------------------------------------------------------------------------|-------------------------------------------------------------------------------------------------------------------------------------------------------------------------------------------------------------------------------------------------------------------------------------------------------------------------------------------------------------------------------------------------------------------------------------------------------------------------------------------------------------------------------------------------------------------------------------------------------------------------------------------------------------|
| Bladder cancer                  | XIf8                                                                                                                                                                                                                                                                                                                                                                                                                                                                                                                                                                                                                                                                                                                                                                                                                                                        | C67, C67.0, C67.1, C67.2, C67.3, C67.4, C67.5, C67.6, C67.7, C67.8, C67.9                                                                                                                                                                                                                                                                                                                                                                                                                                                                                                                                                                                 | 188, 188.0, 188.1, 188.2, 188.3, 188.4, 188.5, 188.6, 188.7, 188.8, 188.9                                                                                                                                                                                                                                                                                                                                                                                                                                                                                                                                                                                   |
| Brain and nervous system cancer | III, IIIa, IIIa1, IIIa2, IIIb, IIIc, IIIc1, IIIc2, IIIc3, IIIc4, IIIc5, IIIc6, IIIc7, IIIc8, IIIc9, IIIc10, IIIc11, IIIc12, IIIc13, IIIc14, IIIc15, IIIc16, IIIc17, IIIc18, IIIc19, IIIc20, IIIc21, IIIc22, IIIc23, IIIc24, IIIc25, IIIc26, IIIc27, IIIc28, IIIc29, IIIc30, IIIc31, IIIc32, IIIc33, IIIc34, IIIc35, IIIc36, IIIc37, IIIc38, IIIc39, IIIc40, IIIc41, IIIc42, IIIc43, IIIc44, IIIc45, IIIc46, IIIc47, IIIc48, IIIc49, IIIc50, IIIc51, IIIc52, IIIc53, IIIc54, IIIc55, IIIc56, IIIc57, IIIc58, IIIc59, IIIc60, IIIc61, IIIc62, IIIc63, IIIc64, IIIc65, IIIc66, IIIc67, IIIc68, IIIc69, IIIc70, IIIc71, IIIc72, IIIc73, IIIc74, IIIc75, IIIc76, IIIc77, IIIc78, IIIc79, IIIc80, IIIc81, IIIc82, IIIc83, IIIc84, IIIc85, IIIc86, IIIc87, IIIc88, IIIc89, IIIc90, IIIc91, IIIc92, IIIc93, IIIc94, IIIc95, IIIc96, IIIc97, IIIc98, IIIc99, IIIc100 | C70, C70.0, C70.1, C70.5, C70.6, C70.9, C71, C71.0, C71.1, C71.2, C71.3, C71.4, C71.5, C71.6, C71.7, C71.8, C71.9, C72, C72.0, C72.1, C72.2, C72.20, C72.21, C72.22, C72.3, C72.30, C72.31, C72.32, C72.4, C72.40, C72.41, C72.42, C72.5, C72.50, C72.59, C72.8, C72.9                                                                                                                                                                                                                                                                                                                                                                                    | 191, 191.0, 191.1, 191.2, 191.3, 191.4, 191.5, 191.6, 191.7, 191.8, 191.9, 192, 192.0, 192.1, 192.2, 192.3, 192.4, 192.8, 192.9                                                                                                                                                                                                                                                                                                                                                                                                                                                                                                                             |
| Thyroid cancer                  | XIb                                                                                                                                                                                                                                                                                                                                                                                                                                                                                                                                                                                                                                                                                                                                                                                                                                                         | C73, C73.0, C73.1, C73.2, C73.3, C73.4, C73.5, C73.8, C73.9                                                                                                                                                                                                                                                                                                                                                                                                                                                                                                                                                                                               | 193, 193.0, 193.2, 193.9                                                                                                                                                                                                                                                                                                                                                                                                                                                                                                                                                                                                                                    |
| Mesothelioma                    | XIIa5                                                                                                                                                                                                                                                                                                                                                                                                                                                                                                                                                                                                                                                                                                                                                                                                                                                       | C45, C45.0, C45.1, C45.2, C45.3, C45.4, C45.5, C45.6, C45.7, C45.8, C45.9                                                                                                                                                                                                                                                                                                                                                                                                                                                                                                                                                                                 | NA                                                                                                                                                                                                                                                                                                                                                                                                                                                                                                                                                                                                                                                          |
| Hodgkin lymphoma                | IIa                                                                                                                                                                                                                                                                                                                                                                                                                                                                                                                                                                                                                                                                                                                                                                                                                                                         | C81, C81.0, C81.00, C81.01, C81.02, C81.03, C81.04, C81.05, C81.06, C81.07, C81.08, C81.09, C81.1, C81.10, C81.11, C81.12, C81.13, C81.14, C81.15, C81.16, C81.17, C81.18, C81.19, C81.2, C81.20, C81.21, C81.22, C81.23, C81.24, C81.25, C81.26, C81.27, C81.28, C81.29, C81.3, C81.30, C81.31, C81.32, C81.33, C81.34, C81.35, C81.36, C81.37, C81.38, C81.39, C81.4, C81.40, C81.41, C81.42, C81.43, C81.44, C81.45, C81.46, C81.47, C81.48, C81.49, C81.5, C81.6, C81.7, C81.70, C81.71, C81.72, C81.73, C81.74, C81.75, C81.76, C81.77, C81.78, C81.79, C81.8, C81.9, C81.90, C81.91, C81.92, C81.93, C81.94, C81.95, C81.96, C81.97, C81.98, C81.99 | 201, 201.0, 201.00, 201.01, 201.02, 201.03, 201.04, 201.05, 201.06, 201.07, 201.08, 201.1, 201.10, 201.11, 201.12, 201.13, 201.14, 201.15, 201.16, 201.17, 201.18, 201.2, 201.20, 201.21, 201.22, 201.23, 201.24, 201.25, 201.26, 201.27, 201.28, 201.4, 201.40, 201.41, 201.42, 201.43, 201.44, 201.45, 201.46, 201.47, 201.48, 201.5, 201.50, 201.51, 201.52, 201.53, 201.54, 201.55, 201.56, 201.57, 201.58, 201.6, 201.60, 201.61, 201.62, 201.63, 201.64, 201.65, 201.66, 201.67, 201.68, 201.7, 201.70, 201.71, 201.72, 201.73, 201.74, 201.75, 201.76, 201.77, 201.78, 201.9, 201.90, 201.91, 201.92, 201.93, 201.94, 201.95, 201.96, 201.97, 201.98 |
| Non-Hodgkin lymphoma            | IIb, IIb1, IIb2, IIb3, IIb4, IIc, IId, IIe                                                                                                                                                                                                                                                                                                                                                                                                                                                                                                                                                                                                                                                                                                                                                                                                                  | C83.7, C83.70, C83.71, C83.72, C83.73, C83.74, C83.75, C83.76, C83.77, C83.78, C83.79, C83.8, C82, C82.0, C82.00, C82.01, C82.02, C82.03, C82.04, C82.05, C82.06, C82.07, C82.08, C82.09, C82.1, C82.10, C82.11, C82.12, C82.13, C82.14, C82.15, C82.16, C82.17, C82.18, C82.19, C82.2, C82.20, C82.21, C82.22, C82.23, C82.24, C82.25, C82.26, C82.27, C82.28, C82.29, C82.3, C82.30, C82.31, C82.32, C82.33, C82.34, C82.35, C82.36, C82.37, C82.38, C82.39, C82.4, C82.40, C82.41, C82.42, C82.43, C82.44, C82.45, C82.46, C82.47, C82.48, C82.49, C82.5, C82.50, C82.51, C82.52, C82.53,                                                              | 200.2, 200.20, 200.21, 200.22, 200.23, 200.24, 200.25, 200.26, 200.27, 200.28, 200, 200.0, 200.00, 200.01, 200.02, 200.03, 200.04, 200.05, 200.06, 200.07, 200.08, 200.1, 200.10, 200.11, 200.12, 200.13, 200.14, 200.15, 200.16, 200.17, 200.18, 200.3, 200.30, 200.31, 200.32, 200.33, 200.34, 200.35, 200.36, 200.37, 200.38, 200.4, 200.40, 200.41, 200.42, 200.43, 200.44, 200.45, 200.46, 200.47, 200.48, 200.5,                                                                                                                                                                                                                                      |

|                  |    |                                                                                                                                                                                                                                                                                                                                                                                                                                                                                                                                                                                                                                                                                                                                                                                                                                                                                                                                                                                                                                                                                                                                                                                                                                                                                                                                                                                                                                                                                                                                                                                                                                                                                                                                                                                                                                                                                                                                                                                                                       |                                                                                                                                                                                                                                                                                                                                                                                                                                                                                                                                                                                                                                                                                                                                                                                                                                                                                                                                                                                                                                                                                                                                                              |
|------------------|----|-----------------------------------------------------------------------------------------------------------------------------------------------------------------------------------------------------------------------------------------------------------------------------------------------------------------------------------------------------------------------------------------------------------------------------------------------------------------------------------------------------------------------------------------------------------------------------------------------------------------------------------------------------------------------------------------------------------------------------------------------------------------------------------------------------------------------------------------------------------------------------------------------------------------------------------------------------------------------------------------------------------------------------------------------------------------------------------------------------------------------------------------------------------------------------------------------------------------------------------------------------------------------------------------------------------------------------------------------------------------------------------------------------------------------------------------------------------------------------------------------------------------------------------------------------------------------------------------------------------------------------------------------------------------------------------------------------------------------------------------------------------------------------------------------------------------------------------------------------------------------------------------------------------------------------------------------------------------------------------------------------------------------|--------------------------------------------------------------------------------------------------------------------------------------------------------------------------------------------------------------------------------------------------------------------------------------------------------------------------------------------------------------------------------------------------------------------------------------------------------------------------------------------------------------------------------------------------------------------------------------------------------------------------------------------------------------------------------------------------------------------------------------------------------------------------------------------------------------------------------------------------------------------------------------------------------------------------------------------------------------------------------------------------------------------------------------------------------------------------------------------------------------------------------------------------------------|
|                  |    | <p>C82.54, C82.55, C82.56, C82.57, C82.58, C82.59, C82.6, C82.60, C82.61, C82.62, C82.63, C82.64, C82.65, C82.66, C82.67, C82.68, C82.69, C82.7, C82.8, C82.80, C82.81, C82.82, C82.83, C82.84, C82.85, C82.86, C82.87, C82.88, C82.89, C82.9, C82.90, C82.91, C82.92, C82.93, C82.94, C82.95, C82.96, C82.97, C82.98, C82.99, C83, C83.0, C83.00, C83.01, C83.02, C83.03, C83.04, C83.05, C83.06, C83.07, C83.08, C83.09, C83.1, C83.10, C83.11, C83.12, C83.13, C83.14, C83.15, C83.16, C83.17, C83.18, C83.19, C83.2, C83.3, C83.30, C83.31, C83.32, C83.33, C83.34, C83.35, C83.36, C83.37, C83.38, C83.39, C83.4, C83.5, C83.50, C83.51, C83.52, C83.53, C83.54, C83.55, C83.56, C83.57, C83.58, C83.59, C83.6, C83.80, C83.81, C83.82, C83.83, C83.84, C83.85, C83.86, C83.87, C83.88, C83.89, C83.9, C83.90, C83.91, C83.92, C83.93, C83.94, C83.95, C83.96, C83.97, C83.98, C83.99, C84, C84.0, C84.00, C84.01, C84.02, C84.03, C84.04, C84.05, C84.06, C84.07, C84.08, C84.09, C84.1, C84.10, C84.11, C84.12, C84.13, C84.14, C84.15, C84.16, C84.17, C84.18, C84.19, C84.2, C84.3, C84.4, C84.40, C84.41, C84.42, C84.43, C84.44, C84.45, C84.46, C84.47, C84.48, C84.49, C84.5, C84.6, C84.60, C84.61, C84.62, C84.63, C84.64, C84.65, C84.66, C84.67, C84.68, C84.69, C84.7, C84.70, C84.71, C84.72, C84.73, C84.74, C84.75, C84.76, C84.77, C84.78, C84.79, C84.8, C84.9, C84.90, C84.91, C84.92, C84.93, C84.94, C84.95, C84.96, C84.97, C84.98, C84.99, C85, C85.0, C85.1, C85.10, C85.11, C85.12, C85.13, C85.14, C85.15, C85.16, C85.17, C85.18, C85.19, C85.2, C85.20, C85.21, C85.22, C85.23, C85.24, C85.25, C85.26, C85.27, C85.28, C85.29, C85.3, C85.4, C85.5, C85.6, C85.7, C85.8, C85.80, C85.81, C85.82, C85.83, C85.84, C85.85, C85.86, C85.87, C85.88, C85.89, C85.9, C85.90, C85.91, C85.92, C85.93, C85.94, C85.95, C85.96, C85.97, C85.98, C85.99, C86, C86.0, C86.1, C86.2, C86.3, C86.4, C86.5, C86.6, C96, C96.0, C96.1, C96.2, C96.3, C96.4, C96.5, C96.6, C96.7, C96.8, C96.9</p> | <p>200.50, 200.51, 200.52, 200.53, 200.54, 200.55, 200.56, 200.57, 200.58, 200.6, 200.60, 200.61, 200.62, 200.63, 200.64, 200.65, 200.66, 200.67, 200.68, 200.7, 200.70, 200.71, 200.72, 200.73, 200.74, 200.75, 200.76, 200.77, 200.78, 200.8, 200.80, 200.81, 200.82, 200.83, 200.84, 200.85, 200.86, 200.87, 200.88, 200.9, 202, 202.0, 202.00, 202.01, 202.02, 202.03, 202.04, 202.05, 202.06, 202.07, 202.08, 202.1, 202.10, 202.11, 202.12, 202.13, 202.14, 202.15, 202.16, 202.17, 202.18, 202.2, 202.20, 202.21, 202.22, 202.23, 202.24, 202.25, 202.26, 202.27, 202.28, 202.3, 202.30, 202.31, 202.32, 202.33, 202.34, 202.35, 202.36, 202.37, 202.38, 202.4, 202.40, 202.41, 202.42, 202.43, 202.44, 202.45, 202.46, 202.47, 202.48, 202.5, 202.50, 202.51, 202.52, 202.53, 202.54, 202.55, 202.56, 202.57, 202.58, 202.6, 202.60, 202.61, 202.62, 202.63, 202.64, 202.65, 202.66, 202.67, 202.68, 202.7, 202.70, 202.71, 202.72, 202.73, 202.74, 202.75, 202.76, 202.77, 202.78, 202.8, 202.80, 202.81, 202.82, 202.83, 202.84, 202.85, 202.86, 202.87, 202.88, 202.9, 202.90, 202.91, 202.92, 202.93, 202.94, 202.95, 202.96, 202.97, 202.98</p> |
| Multiple myeloma | NA | <p>C88, C88.0, C88.00, C88.01, C88.1, C88.2, C88.20, C88.3, C88.4, C88.40, C88.7, C88.70, C88.71, C88.8, C88.9, C89, C90, C90.0, C90.00, C90.01, C90.02, C90.1, C90.10, C90.11, C90.12, C90.2, C90.20, C90.21, C90.22, C90.3, C90.30,</p>                                                                                                                                                                                                                                                                                                                                                                                                                                                                                                                                                                                                                                                                                                                                                                                                                                                                                                                                                                                                                                                                                                                                                                                                                                                                                                                                                                                                                                                                                                                                                                                                                                                                                                                                                                             | <p>203, 203.0, 203.00, 203.01, 203.02, 203.1, 203.10, 203.11, 203.12, 203.8, 203.80, 203.81, 203.82, 203.9</p>                                                                                                                                                                                                                                                                                                                                                                                                                                                                                                                                                                                                                                                                                                                                                                                                                                                                                                                                                                                                                                               |



|  |                                                                                                                                                                                                                                                                                                                                                                                                                                                                                                                                                                                                                      |                                                                                                                                                                                           |
|--|----------------------------------------------------------------------------------------------------------------------------------------------------------------------------------------------------------------------------------------------------------------------------------------------------------------------------------------------------------------------------------------------------------------------------------------------------------------------------------------------------------------------------------------------------------------------------------------------------------------------|-------------------------------------------------------------------------------------------------------------------------------------------------------------------------------------------|
|  | C51.0, C51.1, C51.2, C51.8, C51.9, C52, C52.0,<br>C52.9, C57, C57.0, C57.00, C57.01, C57.02,<br>C57.1, C57.10, C57.11, C57.12, C57.2, C57.20,<br>C57.21, C57.22, C57.3, C57.4, C57.7, C57.8,<br>C58, C58.0, C58.9, C60, C60.0, C60.1, C60.2,<br>C60.8, C60.9, C63, C63.0, C63.00, C63.01,<br>C63.02, C63.1, C63.10, C63.11, C63.12, C63.2,<br>C63.7, C63.8, C66, C66.0, C66.1, C66.2, C66.9,<br>C68.0, C68.1, C68.8, C7, C75, C75.0, C75.1,<br>C75.2, C75.3, C75.4, C75.5, C75.6, C75.8, C49,<br>C49.0, C49.1, C49.10, C49.11, C49.12, C49.2,<br>C49.20, C49.21, C49.22, C49.3, C49.4, C49.5,<br>C49.6, C49.8, C49.9 | 209.01, 209.02, 209.03, 209.22,<br>209.25, 209.26, 209.27, 209.31,<br>209.32, 209.33, 209.34, 209.35,<br>209.36, 171, 171.0, 171.2, 171.3,<br>171.4, 171.5, 171.6, 171.7,<br>171.8, 171.9 |
|--|----------------------------------------------------------------------------------------------------------------------------------------------------------------------------------------------------------------------------------------------------------------------------------------------------------------------------------------------------------------------------------------------------------------------------------------------------------------------------------------------------------------------------------------------------------------------------------------------------------------------|-------------------------------------------------------------------------------------------------------------------------------------------------------------------------------------------|

Abbreviations: ICC3, International Classification of Childhood Cancer, Third Edition; ICD-9, International Classification of Diseases, Ninth Revision; ICD-10, International Classification of Diseases, Tenth Revision; NA, not applicable.

Footnote: Cancers with NA do not have any relevant codes mapped from ICC3. Chronic lymphoid leukemia is only modeled for ages 20 years and above in GBD. ICD codes (ICD-9: 204.1, 204.10, 204.11, and 204.12; ICD-10: C91.1, C91.10, C91.11, and C91.12) under 20 years are redistributed (see Section “6. Redistribution” in this appendix for more information) to “Acute lymphoid leukemia,” while these ICD codes over 20 years old are mapped directly to “Chronic lymphoid leukemia.”

eTable 4: List of International Classification of Diseases (ICD) codes mapped to the Global Burden of Disease cause list for cancer mortality data

| Cause                                | ICCC3       | ICD10                                                                                                                                                                                                                                                                                                                                                                                                                                                                                                                                                                               | ICD9                                                                                                                                                                                                                                                                                                                                                                                                        |
|--------------------------------------|-------------|-------------------------------------------------------------------------------------------------------------------------------------------------------------------------------------------------------------------------------------------------------------------------------------------------------------------------------------------------------------------------------------------------------------------------------------------------------------------------------------------------------------------------------------------------------------------------------------|-------------------------------------------------------------------------------------------------------------------------------------------------------------------------------------------------------------------------------------------------------------------------------------------------------------------------------------------------------------------------------------------------------------|
| Lip and oral cavity cancer           | XIf1        | C00, C00.0, C00.1, C00.2, C00.3, C00.4, C00.5, C00.6, C00.8, C00.9, C01, C01.9, C02, C02.0, C02.1, C02.2, C02.3, C02.4, C02.8, C02.9, C03, C03.0, C03.1, C03.9, C04, C04.0, C04.1, C04.8, C04.9, C05, C05.0, C05.1, C05.2, C05.8, C05.9, C06, C06.0, C06.1, C06.2, C06.8, C06.80, C06.89, C06.9, C07, C07.0, C07.9, C08, C08.0, C08.1, C08.8, C08.9, D00.00, D00.01, D00.02, D00.03, D00.04, D00.05, D00.06, D00.07, D10.0, D10.1, D10.2, D10.3, D10.30, D10.39, D10.4, D10.5, D11, D11.0, D11.7, D11.9, D37.01, D37.02, D37.03, D37.030, D37.031, D37.032, D37.039, D37.04, D37.09 | 140, 140.0, 140.1, 140.2, 140.3, 140.4, 140.5, 140.6, 140.7, 140.8, 140.9, 141, 141.0, 141.1, 141.2, 141.3, 141.4, 141.5, 141.6, 141.8, 141.9, 142, 142.0, 142.1, 142.2, 142.3, 142.8, 142.9, 143, 143.0, 143.1, 143.8, 143.9, 144, 144.0, 144.1, 144.4, 144.8, 144.9, 145, 145.0, 145.1, 145.2, 145.3, 145.4, 145.5, 145.6, 145.8, 145.9, 210, 210.0, 210.1, 210.2, 210.3, 210.4, 210.5, 210.6, 235, 235.0 |
| Nasopharynx cancer                   | XIc         | C11, C11.0, C11.1, C11.2, C11.3, C11.8, C11.9, D00.08, D10.6, D37.05                                                                                                                                                                                                                                                                                                                                                                                                                                                                                                                | 147, 147.0, 147.1, 147.2, 147.3, 147.8, 147.9, 210.7, 210.8, 210.9                                                                                                                                                                                                                                                                                                                                          |
| Other pharynx cancer                 | NA          | C09, C09.0, C09.1, C09.8, C09.9, C1, C10, C10.0, C10.1, C10.2, C10.3, C10.4, C10.8, C10.9, C12, C12.0, C12.9, C13, C13.0, C13.1, C13.2, C13.8, C13.9, D10.7                                                                                                                                                                                                                                                                                                                                                                                                                         | 146, 146.0, 146.1, 146.2, 146.3, 146.4, 146.5, 146.6, 146.7, 146.8, 146.9, 148, 148.0, 148.1, 148.2, 148.3, 148.4, 148.5, 148.8, 148.9                                                                                                                                                                                                                                                                      |
| Esophageal cancer                    | NA          | C15, C15.0, C15.1, C15.2, C15.3, C15.4, C15.5, C15.8, C15.9, D00.1, D13.0                                                                                                                                                                                                                                                                                                                                                                                                                                                                                                           | 150, 150.0, 150.1, 150.2, 150.3, 150.4, 150.5, 150.6, 150.7, 150.8, 150.9, 211, 211.0, 230.1                                                                                                                                                                                                                                                                                                                |
| Stomach cancer                       | NA          | C16, C16.0, C16.1, C16.2, C16.3, C16.4, C16.5, C16.6, C16.7, C16.8, C16.9, D00.2, D13.1, D37.1                                                                                                                                                                                                                                                                                                                                                                                                                                                                                      | 151, 151.0, 151.1, 151.2, 151.3, 151.4, 151.5, 151.6, 151.8, 151.9, 209.23, 209.63, 211.1, 230.2                                                                                                                                                                                                                                                                                                            |
| Colon and rectum cancer              | XIf2, XIf3  | C18, C18.0, C18.1, C18.2, C18.3, C18.4, C18.5, C18.6, C18.7, C18.8, C18.9, C19, C19.0, C19.9, C2, C20, C20.0, C20.8, C20.9, C21, C21.0, C21.1, C21.2, C21.8, C21.9, D01.0, D01.1, D01.2, D01.3, D12, D12.0, D12.1, D12.2, D12.3, D12.4, D12.5, D12.6, D12.7, D12.8, D12.9, D37.3, D37.4, D37.5                                                                                                                                                                                                                                                                                      | 153, 153.0, 153.1, 153.2, 153.3, 153.4, 153.5, 153.6, 153.7, 153.8, 153.9, 154, 154.0, 154.1, 154.2, 154.3, 154.4, 154.8, 154.9, 209.1, 209.10, 209.11, 209.12, 209.13, 209.14, 209.15, 209.16, 209.17, 209.5, 209.50, 209.51, 209.52, 209.53, 209.54, 209.55, 209.56, 209.57, 211.3, 211.4, 230.3, 230.4, 230.5, 230.6, 569.0, 569.43, 569.44, 569.84, 569.85                                              |
| Liver cancer                         | VIIb, VIIfc | C22, C22.0, C22.1, C22.3, C22.4, C22.5, C22.7, C22.8, D13.4                                                                                                                                                                                                                                                                                                                                                                                                                                                                                                                         | 155, 155.0, 155.1, 155.3, 155.5, 155.9, 211.5                                                                                                                                                                                                                                                                                                                                                               |
| Gallbladder and biliary tract cancer | NA          | C23, C23.0, C23.9, C24, C24.0, C24.1, C24.4, C24.8, C24.9, D13.5                                                                                                                                                                                                                                                                                                                                                                                                                                                                                                                    | 156, 156.0, 156.1, 156.2, 156.3, 156.8, 156.9, 209.65, 209.66, 209.67                                                                                                                                                                                                                                                                                                                                       |
| Pancreatic cancer                    | XIIa2       | C25, C25.0, C25.1, C25.2, C25.3, C25.4, C25.7, C25.8, C25.9, D13.6, D13.7                                                                                                                                                                                                                                                                                                                                                                                                                                                                                                           | 157, 157.0, 157.1, 157.2, 157.3, 157.4, 157.5, 157.7, 157.8, 157.9, 211.6, 211.7                                                                                                                                                                                                                                                                                                                            |
| Larynx cancer                        | NA          | C32, C32.0, C32.1, C32.2, C32.3, C32.8, C32.9, D02.0, D14.1, D38.0                                                                                                                                                                                                                                                                                                                                                                                                                                                                                                                  | 161, 161.0, 161.1, 161.2, 161.3, 161.8, 161.9, 212.1, 231, 231.0, 235.6                                                                                                                                                                                                                                                                                                                                     |



|                                                    |              |                                                                                                                                                                                                                                                                                                                                                                                                                                                                                                                                                                                                                                                                                                                                                                                                                                                                                                                                                                                                                                                                                                                                                      |                                                                                                                                                                                                                                                                                                                                                                                                                                                                                             |
|----------------------------------------------------|--------------|------------------------------------------------------------------------------------------------------------------------------------------------------------------------------------------------------------------------------------------------------------------------------------------------------------------------------------------------------------------------------------------------------------------------------------------------------------------------------------------------------------------------------------------------------------------------------------------------------------------------------------------------------------------------------------------------------------------------------------------------------------------------------------------------------------------------------------------------------------------------------------------------------------------------------------------------------------------------------------------------------------------------------------------------------------------------------------------------------------------------------------------------------|---------------------------------------------------------------------------------------------------------------------------------------------------------------------------------------------------------------------------------------------------------------------------------------------------------------------------------------------------------------------------------------------------------------------------------------------------------------------------------------------|
| Tracheal, bronchus, and lung cancer                | XIIa3, XIIf4 | C33, C33.0, C33.2, C33.9, C34, C34.0, C34.00, C34.01, C34.02, C34.1, C34.10, C34.11, C34.12, C34.2, C34.3, C34.30, C34.31, C34.32, C34.4, C34.7, C34.8, C34.80, C34.81, C34.82, C34.9, C34.90, C34.91, C34.92, D02.1, D02.2, D02.20, D02.21, D02.22, D02.3, D14.2, D14.3, D14.30, D14.31, D14.32, D38.1                                                                                                                                                                                                                                                                                                                                                                                                                                                                                                                                                                                                                                                                                                                                                                                                                                              | 162, 162.0, 162.1, 162.2, 162.3, 162.4, 162.5, 162.8, 162.9, 209.21, 209.61, 212.2, 212.3, 231.1, 231.2, 235.7                                                                                                                                                                                                                                                                                                                                                                              |
| Malignant skin melanoma                            | XId          | C43, C43.0, C43.1, C43.10, C43.11, C43.12, C43.2, C43.20, C43.21, C43.22, C43.3, C43.30, C43.31, C43.39, C43.4, C43.5, C43.51, C43.52, C43.59, C43.6, C43.60, C43.61, C43.62, C43.7, C43.70, C43.71, C43.72, C43.8, C43.9, D03, D03.0, D03.1, D03.10, D03.11, D03.12, D03.2, D03.20, D03.21, D03.22, D03.3, D03.30, D03.39, D03.4, D03.5, D03.51, D03.52, D03.59, D03.6, D03.60, D03.61, D03.62, D03.7, D03.70, D03.71, D03.72, D03.8, D03.9, D22, D22.0, D22.1, D22.10, D22.11, D22.12, D22.2, D22.20, D22.21, D22.22, D22.3, D22.30, D22.39, D22.4, D22.5, D22.6, D22.60, D22.61, D22.62, D22.7, D22.70, D22.71, D22.72, D22.9, D23, D23.0, D23.1, D23.10, D23.11, D23.12, D23.2, D23.20, D23.21, D23.22, D23.3, D23.30, D23.39, D23.4, D23.5, D23.6, D23.60, D23.61, D23.62, D23.7, D23.70, D23.71, D23.72, D23.9                                                                                                                                                                                                                                                                                                                                 | 172, 172.0, 172.1, 172.2, 172.3, 172.4, 172.5, 172.6, 172.7, 172.8, 172.9                                                                                                                                                                                                                                                                                                                                                                                                                   |
| Non-melanoma skin cancer                           | XIe          | D48.5                                                                                                                                                                                                                                                                                                                                                                                                                                                                                                                                                                                                                                                                                                                                                                                                                                                                                                                                                                                                                                                                                                                                                | 222.4                                                                                                                                                                                                                                                                                                                                                                                                                                                                                       |
| Non-melanoma skin cancer (squamous-cell carcinoma) | NA           | C44, C44.0, C44.00, C44.01, C44.02, C44.09, C44.1, C44.10, C44.101, C44.102, C44.109, C44.11, C44.111, C44.112, C44.119, C44.12, C44.121, C44.122, C44.129, C44.19, C44.191, C44.192, C44.199, C44.2, C44.20, C44.201, C44.202, C44.209, C44.21, C44.211, C44.212, C44.219, C44.22, C44.221, C44.222, C44.229, C44.29, C44.291, C44.292, C44.299, C44.3, C44.30, C44.300, C44.301, C44.309, C44.31, C44.310, C44.311, C44.319, C44.32, C44.320, C44.321, C44.329, C44.39, C44.390, C44.391, C44.399, C44.4, C44.40, C44.41, C44.42, C44.49, C44.5, C44.50, C44.500, C44.501, C44.509, C44.51, C44.510, C44.511, C44.519, C44.52, C44.520, C44.521, C44.529, C44.59, C44.590, C44.591, C44.599, C44.6, C44.60, C44.601, C44.602, C44.609, C44.61, C44.611, C44.612, C44.619, C44.62, C44.621, C44.622, C44.629, C44.69, C44.691, C44.692, C44.699, C44.7, C44.70, C44.701, C44.702, C44.709, C44.71, C44.711, C44.712, C44.719, C44.72, C44.721, C44.722, C44.729, C44.79, C44.791, C44.792, C44.799, C44.8, C44.80, C44.81, C44.82, C44.89, C44.9, C44.90, C44.91, C44.92, C44.99, D04, D04.0, D04.1, D04.10, D04.11, D04.12, D04.2, D04.20, D04.21, | 173, 173.0, 173.00, 173.01, 173.02, 173.09, 173.1, 173.10, 173.11, 173.12, 173.19, 173.2, 173.20, 173.21, 173.22, 173.29, 173.3, 173.30, 173.31, 173.32, 173.39, 173.4, 173.40, 173.41, 173.42, 173.49, 173.5, 173.50, 173.51, 173.52, 173.59, 173.6, 173.60, 173.61, 173.62, 173.69, 173.7, 173.70, 173.71, 173.72, 173.79, 173.8, 173.80, 173.81, 173.82, 173.89, 173.9, 173.90, 173.91, 173.92, 173.99, 232, 232.0, 232.1, 232.2, 232.3, 232.4, 232.5, 232.6, 232.7, 232.8, 232.9, 238.2 |

|                                         |                                                                                             |                                                                                                                                                                                                                                                                                                                                                                                                                                                                                                                                                                                                                                                                                                                                                                                                                                                                                                                                                |                                                                                                                                                                                                 |
|-----------------------------------------|---------------------------------------------------------------------------------------------|------------------------------------------------------------------------------------------------------------------------------------------------------------------------------------------------------------------------------------------------------------------------------------------------------------------------------------------------------------------------------------------------------------------------------------------------------------------------------------------------------------------------------------------------------------------------------------------------------------------------------------------------------------------------------------------------------------------------------------------------------------------------------------------------------------------------------------------------------------------------------------------------------------------------------------------------|-------------------------------------------------------------------------------------------------------------------------------------------------------------------------------------------------|
|                                         |                                                                                             | D04.22, D04.3, D04.30, D04.39, D04.4, D04.5, D04.6, D04.60, D04.61, D04.62, D04.7, D04.70, D04.71, D04.72, D04.8, D04.9, D49.2                                                                                                                                                                                                                                                                                                                                                                                                                                                                                                                                                                                                                                                                                                                                                                                                                 |                                                                                                                                                                                                 |
| Breast cancer                           | Xif6                                                                                        | C50, C50.0, C50.01, C50.011, C50.012, C50.019, C50.02, C50.021, C50.022, C50.029, C50.1, C50.11, C50.111, C50.112, C50.119, C50.12, C50.121, C50.122, C50.129, C50.2, C50.21, C50.211, C50.212, C50.219, C50.22, C50.221, C50.222, C50.229, C50.3, C50.31, C50.311, C50.312, C50.319, C50.32, C50.321, C50.322, C50.329, C50.4, C50.41, C50.411, C50.412, C50.419, C50.42, C50.421, C50.422, C50.429, C50.5, C50.51, C50.511, C50.512, C50.519, C50.52, C50.521, C50.522, C50.529, C50.6, C50.61, C50.611, C50.612, C50.619, C50.62, C50.621, C50.622, C50.629, C50.7, C50.8, C50.81, C50.811, C50.812, C50.819, C50.82, C50.821, C50.822, C50.829, C50.9, C50.91, C50.911, C50.912, C50.919, C50.92, C50.921, C50.922, C50.929, D05, D05.0, D05.00, D05.01, D05.02, D05.1, D05.10, D05.11, D05.12, D05.7, D05.8, D05.80, D05.81, D05.82, D05.9, D05.90, D05.91, D05.92, D24, D24.0, D24.1, D24.2, D24.9, D48.6, D48.60, D48.61, D48.62, D49.3 | 174, 174.0, 174.1, 174.2, 174.3, 174.4, 174.5, 174.6, 174.8, 174.9, 175, 175.0, 175.3, 175.9, 217, 217.0, 217.8, 233, 233.0, 238.3, 239.3, 610, 610.0, 610.1, 610.2, 610.3, 610.4, 610.8, 610.9 |
| Cervical cancer                         | Xif7                                                                                        | C53, C53.0, C53.1, C53.3, C53.4, C53.8, C53.9, D06, D06.0, D06.1, D06.7, D06.9, D26.0                                                                                                                                                                                                                                                                                                                                                                                                                                                                                                                                                                                                                                                                                                                                                                                                                                                          | 180, 180.0, 180.1, 180.2, 180.3, 180.4, 180.5, 180.6, 180.8, 180.9, 219, 219.0, 233.1, 622.1, 622.10, 622.11, 622.12, 622.2, 622.7                                                              |
| Uterine cancer                          | NA                                                                                          | C54, C54.0, C54.1, C54.2, C54.3, C54.4, C54.8, C54.9, D07.0, D07.1, D07.2, D26.1, D26.7, D26.9                                                                                                                                                                                                                                                                                                                                                                                                                                                                                                                                                                                                                                                                                                                                                                                                                                                 | 182, 182.0, 182.1, 182.8, 182.9, 233.2                                                                                                                                                          |
| Ovarian cancer                          | NA                                                                                          | C56, C56.0, C56.1, C56.2, C56.4, C56.9, D27, D27.0, D27.1, D27.9, D39.1, D39.10, D39.11, D39.12                                                                                                                                                                                                                                                                                                                                                                                                                                                                                                                                                                                                                                                                                                                                                                                                                                                | 183, 183.0, 220, 220.0, 220.9, 236.2                                                                                                                                                            |
| Prostate cancer                         | NA                                                                                          | C61, C61.0, C61.9, D07.5, D29.1, D40.0                                                                                                                                                                                                                                                                                                                                                                                                                                                                                                                                                                                                                                                                                                                                                                                                                                                                                                         | 185, 185.0, 185.9, 222.2, 236.5                                                                                                                                                                 |
| Testicular cancer                       | NA                                                                                          | C62, C62.0, C62.00, C62.01, C62.02, C62.1, C62.10, C62.11, C62.12, C62.9, C62.90, C62.91, C62.92, D29.2, D29.20, D29.21, D29.22, D29.3, D29.30, D29.31, D29.32, D29.4, D29.7, D29.8, D40.1, D40.10, D40.11, D40.12, D40.7, D40.8                                                                                                                                                                                                                                                                                                                                                                                                                                                                                                                                                                                                                                                                                                               | 186, 186.0, 186.9, 222, 222.0, 222.3, 236.4                                                                                                                                                     |
| Kidney cancer                           | VI, VIa, VIa1, VIa2, VIa3, VIa4, VIb, VIc                                                   | C64, C64.0, C64.1, C64.2, C64.4, C64.5, C64.6, C64.8, C64.9, C65, C65.0, C65.1, C65.2, C65.9, D30.0, D30.00, D30.01, D30.02, D30.1, D30.10, D30.11, D30.12, D41.0, D41.00, D41.01, D41.02, D41.1, D41.10, D41.11, D41.12                                                                                                                                                                                                                                                                                                                                                                                                                                                                                                                                                                                                                                                                                                                       | 189.0, 189.1, 189.5, 189.6, 209.24, 209.64, 223, 223.0, 223.1, 236.91                                                                                                                           |
| Bladder cancer                          | Xif8                                                                                        | C67, C67.0, C67.1, C67.2, C67.3, C67.4, C67.5, C67.6, C67.7, C67.8, C67.9, D09.0, D30.3, D41.4, D41.7, D41.8, D49.4                                                                                                                                                                                                                                                                                                                                                                                                                                                                                                                                                                                                                                                                                                                                                                                                                            | 188, 188.0, 188.1, 188.2, 188.3, 188.4, 188.5, 188.6, 188.7, 188.8, 188.9, 223.3, 233.7, 236.7, 239.4                                                                                           |
| Brain and central nervous system cancer | III, IIIa, IIIa1, IIIa2, IIIb, IIIc, IIIc1, IIIc2, IIIc3, IIIc4, IIId, IIId1, IIId2, IIId3, | C70, C70.0, C70.1, C70.5, C70.6, C70.9, C71, C71.0, C71.1, C71.2, C71.3, C71.4, C71.5, C71.6, C71.7, C71.8, C71.9, C72, C72.0, C72.1, C72.2, C72.20, C72.21, C72.22, C72.3, C72.30, C72.31, C72.32, C72.4, C72.40, C72.41, C72.42, C72.5, C72.50, C72.59, C72.8, C72.9                                                                                                                                                                                                                                                                                                                                                                                                                                                                                                                                                                                                                                                                         | 191, 191.0, 191.1, 191.2, 191.3, 191.4, 191.5, 191.6, 191.7, 191.8, 191.9, 192, 192.0, 192.1, 192.2, 192.3, 192.4, 192.8, 192.9                                                                 |

|                      |                                                                                 |                                                                                                                                                                                                                                                                                                                                                                                                                                                                                                                                                                                                                                                                                                                                                                                                                                                                                                                               |                                                                                                                                                                                                                                                                                                                                                                                                                                                                                                                                                                                                                                                             |
|----------------------|---------------------------------------------------------------------------------|-------------------------------------------------------------------------------------------------------------------------------------------------------------------------------------------------------------------------------------------------------------------------------------------------------------------------------------------------------------------------------------------------------------------------------------------------------------------------------------------------------------------------------------------------------------------------------------------------------------------------------------------------------------------------------------------------------------------------------------------------------------------------------------------------------------------------------------------------------------------------------------------------------------------------------|-------------------------------------------------------------------------------------------------------------------------------------------------------------------------------------------------------------------------------------------------------------------------------------------------------------------------------------------------------------------------------------------------------------------------------------------------------------------------------------------------------------------------------------------------------------------------------------------------------------------------------------------------------------|
|                      | IIIe, IIIe1, IIIe2, IIIe3, IIIe4, IIIe5, IIIf, Xa, Xa1, Xa2, Xa3, Xa4, Xa5, Xa6 |                                                                                                                                                                                                                                                                                                                                                                                                                                                                                                                                                                                                                                                                                                                                                                                                                                                                                                                               |                                                                                                                                                                                                                                                                                                                                                                                                                                                                                                                                                                                                                                                             |
| Thyroid cancer       | XIb                                                                             | C73, C73.0, C73.1, C73.2, C73.3, C73.4, C73.5, C73.8, C73.9, D09.3, D09.8, D34, D34.0, D34.9, D44.0                                                                                                                                                                                                                                                                                                                                                                                                                                                                                                                                                                                                                                                                                                                                                                                                                           | 193, 193.0, 193.2, 193.9, 226, 226.0, 226.9                                                                                                                                                                                                                                                                                                                                                                                                                                                                                                                                                                                                                 |
| Mesothelioma         | XIIa5                                                                           | C45, C45.0, C45.1, C45.2, C45.3, C45.4, C45.5, C45.6, C45.7, C45.8, C45.9                                                                                                                                                                                                                                                                                                                                                                                                                                                                                                                                                                                                                                                                                                                                                                                                                                                     | NA                                                                                                                                                                                                                                                                                                                                                                                                                                                                                                                                                                                                                                                          |
| Hodgkin lymphoma     | Ila                                                                             | C81, C81.0, C81.00, C81.01, C81.02, C81.03, C81.04, C81.05, C81.06, C81.07, C81.08, C81.09, C81.1, C81.10, C81.11, C81.12, C81.13, C81.14, C81.15, C81.16, C81.17, C81.18, C81.19, C81.2, C81.20, C81.21, C81.22, C81.23, C81.24, C81.25, C81.26, C81.27, C81.28, C81.29, C81.3, C81.30, C81.31, C81.32, C81.33, C81.34, C81.35, C81.36, C81.37, C81.38, C81.39, C81.4, C81.40, C81.41, C81.42, C81.43, C81.44, C81.45, C81.46, C81.47, C81.48, C81.49, C81.5, C81.6, C81.7, C81.70, C81.71, C81.72, C81.73, C81.74, C81.75, C81.76, C81.77, C81.78, C81.79, C81.8, C81.9, C81.90, C81.91, C81.92, C81.93, C81.94, C81.95, C81.96, C81.97, C81.98, C81.99                                                                                                                                                                                                                                                                     | 201, 201.0, 201.00, 201.01, 201.02, 201.03, 201.04, 201.05, 201.06, 201.07, 201.08, 201.1, 201.10, 201.11, 201.12, 201.13, 201.14, 201.15, 201.16, 201.17, 201.18, 201.2, 201.20, 201.21, 201.22, 201.23, 201.24, 201.25, 201.26, 201.27, 201.28, 201.4, 201.40, 201.41, 201.42, 201.43, 201.44, 201.45, 201.46, 201.47, 201.48, 201.5, 201.50, 201.51, 201.52, 201.53, 201.54, 201.55, 201.56, 201.57, 201.58, 201.6, 201.60, 201.61, 201.62, 201.63, 201.64, 201.65, 201.66, 201.67, 201.68, 201.7, 201.70, 201.71, 201.72, 201.73, 201.74, 201.75, 201.76, 201.77, 201.78, 201.9, 201.90, 201.91, 201.92, 201.93, 201.94, 201.95, 201.96, 201.97, 201.98 |
| Non-Hodgkin lymphoma | IIf, IIb, IIb1, IIb2, IIb3, IIb4, IIc, IIId, IIe                                | C83.7, C83.70, C83.71, C83.72, C83.73, C83.74, C83.75, C83.76, C83.77, C83.78, C83.79, C83.8, C82, C82.0, C82.00, C82.01, C82.02, C82.03, C82.04, C82.05, C82.06, C82.07, C82.08, C82.09, C82.1, C82.10, C82.11, C82.12, C82.13, C82.14, C82.15, C82.16, C82.17, C82.18, C82.19, C82.2, C82.20, C82.21, C82.22, C82.23, C82.24, C82.25, C82.26, C82.27, C82.28, C82.29, C82.3, C82.30, C82.31, C82.32, C82.33, C82.34, C82.35, C82.36, C82.37, C82.38, C82.39, C82.4, C82.40, C82.41, C82.42, C82.43, C82.44, C82.45, C82.46, C82.47, C82.48, C82.49, C82.5, C82.50, C82.51, C82.52, C82.53, C82.54, C82.55, C82.56, C82.57, C82.58, C82.59, C82.6, C82.60, C82.61, C82.62, C82.63, C82.64, C82.65, C82.66, C82.67, C82.68, C82.69, C82.7, C82.8, C82.80, C82.81, C82.82, C82.83, C82.84, C82.85, C82.86, C82.87, C82.88, C82.89, C82.9, C82.90, C82.91, C82.92, C82.93, C82.94, C82.95, C82.96, C82.97, C82.98, C82.99, C83, | 200.2, 200.20, 200.21, 200.22, 200.23, 200.24, 200.25, 200.26, 200.27, 200.28, 200, 200.0, 200.00, 200.01, 200.02, 200.03, 200.04, 200.05, 200.06, 200.07, 200.08, 200.1, 200.10, 200.11, 200.12, 200.13, 200.14, 200.15, 200.16, 200.17, 200.18, 200.3, 200.30, 200.31, 200.32, 200.33, 200.34, 200.35, 200.36, 200.37, 200.38, 200.4, 200.40, 200.41, 200.42, 200.43, 200.44, 200.45, 200.46, 200.47, 200.48, 200.5, 200.50, 200.51, 200.52, 200.53, 200.54, 200.55, 200.56, 200.57, 200.58, 200.6, 200.60, 200.61, 200.62, 200.63, 200.64, 200.65, 200.66, 200.67, 200.68, 200.7, 200.70, 200.71, 200.72, 200.73,                                        |

|                         |                        |                                                                                                                                                                                                                                                                                                                                                                                                                                                                                                                                                                                                                                                                                                                                                                                                                                                                                                                                                                                                                                                                                                                                                                                                                                                                                                                                                                                                                                                                                                                                                                                                                                                                                      |                                                                                                                                                                                                                                                                                                                                                                                                                                                                                                                                                                                                                                                                                                                                                                                                                                                                                                                                                                |
|-------------------------|------------------------|--------------------------------------------------------------------------------------------------------------------------------------------------------------------------------------------------------------------------------------------------------------------------------------------------------------------------------------------------------------------------------------------------------------------------------------------------------------------------------------------------------------------------------------------------------------------------------------------------------------------------------------------------------------------------------------------------------------------------------------------------------------------------------------------------------------------------------------------------------------------------------------------------------------------------------------------------------------------------------------------------------------------------------------------------------------------------------------------------------------------------------------------------------------------------------------------------------------------------------------------------------------------------------------------------------------------------------------------------------------------------------------------------------------------------------------------------------------------------------------------------------------------------------------------------------------------------------------------------------------------------------------------------------------------------------------|----------------------------------------------------------------------------------------------------------------------------------------------------------------------------------------------------------------------------------------------------------------------------------------------------------------------------------------------------------------------------------------------------------------------------------------------------------------------------------------------------------------------------------------------------------------------------------------------------------------------------------------------------------------------------------------------------------------------------------------------------------------------------------------------------------------------------------------------------------------------------------------------------------------------------------------------------------------|
|                         |                        | <p>C83.0, C83.00, C83.01, C83.02, C83.03, C83.04, C83.05, C83.06, C83.07, C83.08, C83.09, C83.1, C83.10, C83.11, C83.12, C83.13, C83.14, C83.15, C83.16, C83.17, C83.18, C83.19, C83.2, C83.3, C83.30, C83.31, C83.32, C83.33, C83.34, C83.35, C83.36, C83.37, C83.38, C83.39, C83.4, C83.5, C83.50, C83.51, C83.52, C83.53, C83.54, C83.55, C83.56, C83.57, C83.58, C83.59, C83.6, C83.80, C83.81, C83.82, C83.83, C83.84, C83.85, C83.86, C83.87, C83.88, C83.89, C83.9, C83.90, C83.91, C83.92, C83.93, C83.94, C83.95, C83.96, C83.97, C83.98, C83.99, C84, C84.0, C84.00, C84.01, C84.02, C84.03, C84.04, C84.05, C84.06, C84.07, C84.08, C84.09, C84.1, C84.10, C84.11, C84.12, C84.13, C84.14, C84.15, C84.16, C84.17, C84.18, C84.19, C84.2, C84.3, C84.4, C84.40, C84.41, C84.42, C84.43, C84.44, C84.45, C84.46, C84.47, C84.48, C84.49, C84.5, C84.6, C84.60, C84.61, C84.62, C84.63, C84.64, C84.65, C84.66, C84.67, C84.68, C84.69, C84.7, C84.70, C84.71, C84.72, C84.73, C84.74, C84.75, C84.76, C84.77, C84.78, C84.79, C84.8, C84.9, C84.90, C84.91, C84.92, C84.93, C84.94, C84.95, C84.96, C84.97, C84.98, C84.99, C85, C85.0, C85.1, C85.10, C85.11, C85.12, C85.13, C85.14, C85.15, C85.16, C85.17, C85.18, C85.19, C85.2, C85.20, C85.21, C85.22, C85.23, C85.24, C85.25, C85.26, C85.27, C85.28, C85.29, C85.3, C85.4, C85.5, C85.6, C85.7, C85.8, C85.80, C85.81, C85.82, C85.83, C85.84, C85.85, C85.86, C85.87, C85.88, C85.89, C85.9, C85.90, C85.91, C85.92, C85.93, C85.94, C85.95, C85.96, C85.97, C85.98, C85.99, C86, C86.0, C86.1, C86.2, C86.3, C86.4, C86.5, C86.6, C96, C96.0, C96.1, C96.2, C96.3, C96.4, C96.5, C96.6, C96.7, C96.8, C96.9</p> | <p>200.74, 200.75, 200.76, 200.77, 200.78, 200.8, 200.80, 200.81, 200.82, 200.83, 200.84, 200.85, 200.86, 200.87, 200.88, 200.9, 202, 202.0, 202.00, 202.01, 202.02, 202.03, 202.04, 202.05, 202.06, 202.07, 202.08, 202.1, 202.10, 202.11, 202.12, 202.13, 202.14, 202.15, 202.16, 202.17, 202.18, 202.2, 202.20, 202.21, 202.22, 202.23, 202.24, 202.25, 202.26, 202.27, 202.28, 202.3, 202.30, 202.31, 202.32, 202.33, 202.34, 202.35, 202.36, 202.37, 202.38, 202.4, 202.40, 202.41, 202.42, 202.43, 202.44, 202.45, 202.46, 202.47, 202.48, 202.5, 202.50, 202.51, 202.52, 202.53, 202.54, 202.55, 202.56, 202.57, 202.58, 202.6, 202.60, 202.61, 202.62, 202.63, 202.64, 202.65, 202.66, 202.67, 202.68, 202.7, 202.70, 202.71, 202.72, 202.73, 202.74, 202.75, 202.76, 202.77, 202.78, 202.8, 202.80, 202.81, 202.82, 202.83, 202.84, 202.85, 202.86, 202.87, 202.88, 202.9, 202.90, 202.91, 202.92, 202.93, 202.94, 202.95, 202.96, 202.97, 202.98</p> |
| Multiple myeloma        | NA                     | <p>C88, C88.0, C88.00, C88.01, C88.1, C88.2, C88.20, C88.3, C88.4, C88.40, C88.7, C88.70, C88.71, C88.8, C88.9, C89, C90, C90.0, C90.00, C90.01, C90.02, C90.1, C90.10, C90.11, C90.12, C90.2, C90.20, C90.21, C90.22, C90.3, C90.30, C90.31, C90.32, C90.4, C90.5, C90.6, C90.7, C90.8, C90.9</p>                                                                                                                                                                                                                                                                                                                                                                                                                                                                                                                                                                                                                                                                                                                                                                                                                                                                                                                                                                                                                                                                                                                                                                                                                                                                                                                                                                                   | <p>203, 203.0, 203.00, 203.01, 203.02, 203.1, 203.10, 203.11, 203.12, 203.8, 203.80, 203.81, 203.82, 203.9</p>                                                                                                                                                                                                                                                                                                                                                                                                                                                                                                                                                                                                                                                                                                                                                                                                                                                 |
| Leukemia                | NA                     | <p>C91, C92</p>                                                                                                                                                                                                                                                                                                                                                                                                                                                                                                                                                                                                                                                                                                                                                                                                                                                                                                                                                                                                                                                                                                                                                                                                                                                                                                                                                                                                                                                                                                                                                                                                                                                                      | <p>204, 205, 206</p>                                                                                                                                                                                                                                                                                                                                                                                                                                                                                                                                                                                                                                                                                                                                                                                                                                                                                                                                           |
| Acute lymphoid leukemia | la, la1, la2, la3, la4 | <p>C91.0, C91.00, C91.01, C91.02, C91.2, C91.3, C91.30, C91.31, C91.32, C91.6, C91.60, C91.61, C91.62</p>                                                                                                                                                                                                                                                                                                                                                                                                                                                                                                                                                                                                                                                                                                                                                                                                                                                                                                                                                                                                                                                                                                                                                                                                                                                                                                                                                                                                                                                                                                                                                                            | <p>204.0, 204.00, 204.01, 204.02, 204.2, 204.20, 204.21, 204.22</p>                                                                                                                                                                                                                                                                                                                                                                                                                                                                                                                                                                                                                                                                                                                                                                                                                                                                                            |
| Acute myeloid leukemia  | lb                     | <p>C92.0, C92.00, C92.01, C92.02, C92.3, C92.30, C92.31, C92.32, C92.4, C92.40, C92.41, C92.42, C92.5, C92.50, C92.51, C92.52, C92.6, C92.60, C92.61, C92.62, C93.0, C93.00, C93.01, C93.02, C94.0, C94.00, C94.01, C94.02, C94.2, C94.20, C94.21, C94.22, C94.4, C94.40, C94.41, C94.42, C94.5</p>                                                                                                                                                                                                                                                                                                                                                                                                                                                                                                                                                                                                                                                                                                                                                                                                                                                                                                                                                                                                                                                                                                                                                                                                                                                                                                                                                                                  | <p>205.0, 205.00, 205.01, 205.02, 205.2, 205.20, 205.21, 205.22, 205.3, 205.30, 205.31, 205.32, 206.0, 206.00, 206.01, 206.02, 207.0, 207.00, 207.01, 207.02, 207.20, 207.8, 207.80, 207.81, 207.82</p>                                                                                                                                                                                                                                                                                                                                                                                                                                                                                                                                                                                                                                                                                                                                                        |



|  |                                                                                                                                                                                                                                                                                                                                                                                                                                                                                                                                                                                                                                                                                                                                                                                                                                                                                                                                                                                                                                                                                                                                                 |                                                                                                                                                                                                                                                                                                                                                                                                                                            |
|--|-------------------------------------------------------------------------------------------------------------------------------------------------------------------------------------------------------------------------------------------------------------------------------------------------------------------------------------------------------------------------------------------------------------------------------------------------------------------------------------------------------------------------------------------------------------------------------------------------------------------------------------------------------------------------------------------------------------------------------------------------------------------------------------------------------------------------------------------------------------------------------------------------------------------------------------------------------------------------------------------------------------------------------------------------------------------------------------------------------------------------------------------------|--------------------------------------------------------------------------------------------------------------------------------------------------------------------------------------------------------------------------------------------------------------------------------------------------------------------------------------------------------------------------------------------------------------------------------------------|
|  | D16.21, D16.22, D16.3, D16.30, D16.31, D16.32, D16.4, D16.5, D16.6, D16.7, D16.8, D16.9, D28.0, D28.1, D28.7, D29.0, D30.2, D30.20, D30.21, D30.22, D30.4, D30.7, D30.8, D31, D31.0, D31.00, D31.01, D31.02, D31.1, D31.10, D31.11, D31.12, D31.2, D31.20, D31.21, D31.22, D31.3, D31.30, D31.31, D31.32, D31.4, D31.40, D31.41, D31.42, D31.5, D31.50, D31.51, D31.52, D31.6, D31.60, D31.61, D31.62, D31.9, D31.90, D31.91, D31.92, D32, D32.0, D32.1, D32.9, D33, D33.0, D33.1, D33.2, D33.3, D33.4, D33.7, D33.9, D35, D35.0, D35.00, D35.01, D35.02, D35.1, D35.2, D35.3, D35.4, D35.5, D35.6, D35.7, D35.8, D35.9, D36, D36.1, D36.10, D36.11, D36.12, D36.13, D36.14, D36.15, D36.16, D36.17, D36.7, D37.2, D38.2, D38.3, D38.4, D38.5, D39.2, D39.8, D41.2, D41.20, D41.21, D41.22, D41.3, D42, D42.0, D42.1, D42.9, D43, D43.0, D43.1, D43.2, D43.3, D43.4, D43.7, D43.8, D43.9, D44.1, D44.10, D44.11, D44.12, D44.2, D44.3, D44.4, D44.5, D44.6, D44.7, D44.8, D48.0, D48.1, D48.2, D48.3, D48.4, D49.6, D49.81, C49, C49.0, C49.1, C49.10, C49.11, C49.12, C49.2, C49.20, C49.21, C49.22, C49.3, C49.4, C49.5, C49.6, C49.8, C49.9` | 227.1, 227.3, 227.4, 227.5, 227.6, 227.8, 227.9, 228, 228.0, 228.00, 228.01, 228.02, 228.03, 228.04, 228.09, 228.1, 228.9, 229.0, 229.8, 230.7, 230.8, 233.31, 233.32, 233.4, 233.5, 234.0, 234.5, 234.8, 235.4, 235.8, 236.1, 236.99, 237, 237.0, 237.1, 237.2, 237.3, 237.5, 237.6, 237.7, 237.70, 237.71, 237.72, 237.73, 237.79, 237.9, 238.0, 238.1, 239.2, 239.6, 171, 171.0, 171.2, 171.3, 171.4, 171.5, 171.6, 171.7, 171.8, 171.9 |
|--|-------------------------------------------------------------------------------------------------------------------------------------------------------------------------------------------------------------------------------------------------------------------------------------------------------------------------------------------------------------------------------------------------------------------------------------------------------------------------------------------------------------------------------------------------------------------------------------------------------------------------------------------------------------------------------------------------------------------------------------------------------------------------------------------------------------------------------------------------------------------------------------------------------------------------------------------------------------------------------------------------------------------------------------------------------------------------------------------------------------------------------------------------|--------------------------------------------------------------------------------------------------------------------------------------------------------------------------------------------------------------------------------------------------------------------------------------------------------------------------------------------------------------------------------------------------------------------------------------------|

Abbreviations: ICC3, International Classification of Childhood Cancer, Third Edition; ICD-9, International Classification of Diseases, Ninth Revision; ICD-10, International Classification of Diseases, Tenth Revision; NA, not applicable.

Footnote: Cancers with NA do not have any relevant codes mapped from ICC3. Chronic lymphoid leukemia is only modeled for ages 20 years and above in GBD. ICD codes (ICD-9: 204.1, 204.10, 204.11, and 204.12; ICD-10: C91.1, C91.10, C91.11, and C91.12) under 20 years are redistributed (see Section “6. Redistribution” in this appendix for more information) to “Acute lymphoid leukemia,” while these ICD codes over 20 years old are mapped directly to “Chronic lymphoid leukemia.”

eTable 5: Undefined cancer code categories (ICD-10) and respective target codes for cancer registry incidence data

| Unspecified site cancer codes                                                                             | Target codes for redistribution of these unspecified site cancer                                                                                                                                                                                                                                                                                                                                                                                                                                                                                                                                                                                                                                                                                                                                                                                                                                                                                                                                                                                                                                                                                                                                                                                                                                                                                                                                                                                                                                                                                                                                                                                                                                                                                                |
|-----------------------------------------------------------------------------------------------------------|-----------------------------------------------------------------------------------------------------------------------------------------------------------------------------------------------------------------------------------------------------------------------------------------------------------------------------------------------------------------------------------------------------------------------------------------------------------------------------------------------------------------------------------------------------------------------------------------------------------------------------------------------------------------------------------------------------------------------------------------------------------------------------------------------------------------------------------------------------------------------------------------------------------------------------------------------------------------------------------------------------------------------------------------------------------------------------------------------------------------------------------------------------------------------------------------------------------------------------------------------------------------------------------------------------------------------------------------------------------------------------------------------------------------------------------------------------------------------------------------------------------------------------------------------------------------------------------------------------------------------------------------------------------------------------------------------------------------------------------------------------------------|
| C14, C14.0-14.3, C14.8-14.9                                                                               | C00-13, C00.0-00.6, C00.8-01.0, C01.9-02.4, C02.8-03.1, C03.9-04.1, C04.8-05.2, C05.8-06.2, C06.8-07.0, C07.9-08.1, C08.8-09.1, C09.8-10.4, C10.8-11.3, C11.8-12.0, C12.9-13.2, C13.8-13.9, D10.0-10.7, D11, D11.0, D11.7, D11.9                                                                                                                                                                                                                                                                                                                                                                                                                                                                                                                                                                                                                                                                                                                                                                                                                                                                                                                                                                                                                                                                                                                                                                                                                                                                                                                                                                                                                                                                                                                                |
| C26-29, C26.0-26.2, C26.8-26.9, C35-36                                                                    | C02.0, C03.0, C04.0, C05.0, C07.0, C15-25, C15.0-15.5, C15.8-17.3, C17.8-19.0, C19.9-20.0, C20.8-21.2, C21.8-22.5, C22.7-22.8, C23.0, C23.9-24.1, C24.4, C24.8-25.4, C25.7-25.9, C30-31, C30.0-30.3, C30.5, C30.8-31.3, C31.8-31.9, C37-38, C37.0-37.3, C38.0-38.4, C38.8, C45, C45.0-45.9, C48, C48.0-48.2, C48.8-48.9, C51-52, C51.0-51.2, C51.8-52.0, C52.9, C57, C57.0-57.4, C57.7-57.8, C60, C60.0-60.2, C60.8-60.9, C63, C63.0-63.2, C63.7-63.8, C66, C66.0-66.2, C66.9, C68.0-68.1, C68.8, C75, C75.0-75.6, C75.8, D00.1-00.2, D01.0-01.3, D07.4, D09.2, D12, D12.0-13.7, D14.0, D15-16, D15.0-15.2, D15.7, D15.9-16.9, D28.0-28.1, D28.7, D29.0, D30.2, D30.4, D30.7-30.8, D31, D31.0-31.6, D31.9, D35-36, D35.0-35.2, D35.5-35.9, D36.1, D36.7, D37.1-37.5, D38.2-38.5, D39.2, D39.8, D41.2-41.3, D44.1-44.8, D48.0-48.4                                                                                                                                                                                                                                                                                                                                                                                                                                                                                                                                                                                                                                                                                                                                                                                                                                                                                                                               |
| C39, C39.0, C39.8-39.9                                                                                    | C03.0, C04.0, C05.0, C07.0, C17, C17.0-17.3, C17.8-17.9, C30-34, C30.0-30.3, C30.5, C30.8-31.3, C31.8-32.3, C32.8-33.0, C33.2, C33.9-34.4, C34.7-34.9, C37-38, C37.0-37.3, C38.0-38.4, C38.8, C45, C45.0-45.9, C48, C48.0-48.2, C48.8-48.9, C51-52, C51.0-51.2, C51.8-52.0, C52.9, C57, C57.0-57.4, C57.7-57.8, C60, C60.0-60.2, C60.8-60.9, C63, C63.0-63.2, C63.7-63.8, C66, C66.0-66.2, C66.9, C68.0-68.1, C68.8, C75, C75.0-75.6, C75.8, D02.0-02.3, D07.4, D09.2, D13.2-13.3, D14.0-14.3, D15-16, D15.0-15.2, D15.7, D15.9-16.9, D28.0-28.1, D28.7, D29.0, D30.2, D30.4, D30.7-30.8, D31, D31.0-31.6, D31.9, D35-36, D35.0-35.2, D35.5-35.9, D36.1, D36.7, D37.2, D38.0-38.5, D39.2, D39.8, D41.2-41.3, D44.1-44.8, D48.0-48.4                                                                                                                                                                                                                                                                                                                                                                                                                                                                                                                                                                                                                                                                                                                                                                                                                                                                                                                                                                                                                             |
| C42, C76-80, C76.4-76.5, C76.7-76.9, C77.3-77.4, C77.8-77.9, C79.2-80.2, C80.9, C87, C97-99, C97.0, C97.9 | C00-13, C00.0-00.6, C00.8-01.0, C01.9-02.4, C02.8-03.1, C03.9-04.1, C04.8-05.2, C05.8-06.2, C06.8-07.0, C07.9-08.1, C08.8-09.1, C09.8-10.4, C10.8-11.3, C11.8-12.0, C12.9-13.2, C13.8-13.9, C15-21, C15.0-15.5, C15.8-17.3, C17.8-19.0, C19.9-20.0, C20.8-21.2, C21.8-21.9, C22.2, C23-25, C23.0, C23.9-24.1, C24.4, C24.8-25.4, C25.7-25.9, C30-34, C30.0-30.3, C30.5, C30.8-31.3, C31.8-32.3, C32.8-33.0, C33.2, C33.9-34.4, C34.7-34.9, C37-38, C37.0-37.3, C38.0-38.4, C38.8, C40-41, C40.0-40.3, C40.8-41.9, C43-44, C43.0-44.9, C47-54, C47.0-47.6, C47.8-48.2, C48.8-49.6, C49.8-51.2, C51.8-52.0, C52.9-53.1, C53.3-53.4, C53.8-54.4, C54.8-54.9, C56-57, C56.0-56.2, C56.4, C56.9-57.4, C57.7-57.8, C60-67, C60.0-60.2, C60.8-61.0, C61.9-62.1, C62.9-63.2, C63.7-63.8, C64.0-64.2, C64.4-64.6, C64.8-65.2, C65.9-66.2, C66.9-68.1, C68.8, C69.0-69.8, C70-73, C70.0-70.1, C70.5-70.6, C70.9-72.5, C72.8-73.5, C73.8-73.9, C75, C75.0-75.6, C75.8, C81-86, C81.0-86.6, C88, C88.0-88.4, C88.7-88.9, C90-96, C90.0-91.0, C91.2-91.3, C91.6, C92.0-92.6, C93.0-93.1, C93.3, C93.8, C94.0-94.8, C95.0-95.2, C95.4, C95.6-95.7, C95.9-96.9, D00.1-00.2, D01.0-01.3, D02.0-02.3, D03-06, D03.0-05.1, D05.7-06.1, D06.7, D06.9-07.2, D07.4-07.5, D09.0, D09.2-09.3, D09.8, D10.0-10.7, D11-12, D11.0, D11.7, D11.9-13.3, D13.5-13.7, D14.0-14.3, D15-16, D15.0-15.2, D15.7, D15.9-16.9, D22-24, D22.0-22.7, D22.9-23.7, D23.9-24.2, D24.9, D26.0-26.1, D26.7, D26.9-27.1, D27, D27.9-28.1, D28.7, D29.0-29.4, D29.7-29.8, D30.0-30.4, D30.7-30.8, D31, D31.0-31.6, D31.9, D34-36, D34.0, D34.9-35.2, D35.5-35.9, D36.1, D36.7, D37.1-37.5, D38.0-38.5, D39.1-39.2, D39.8, D40.0-40.1, D40.7-40.8, D41.0-41.4, D41.7-41.8, D44.0-44.8, D48.0-48.6, D49.2-49.4 |
| C55, C55.0-55.1, C55.9-55.9                                                                               | C03.0, C04.0, C05.0, C07.0, C17, C17.0-17.3, C17.8-17.9, C30-31, C30.0-30.3, C30.5, C30.8-31.3, C31.8-31.9, C37-38, C37.0-37.3, C38.0-38.4, C38.8, C48, C48.0-48.2, C48.8-48.9, C51-54, C51.0-51.2, C51.8-52.0, C52.9-53.1, C53.3-53.4, C53.8-54.4, C54.8-54.9, C57, C57.0-57.4, C57.7-57.8, C60, C60.0-60.2, C60.8-60.9, C63, C63.0-63.2, C63.7-63.8, C66, C66.0-66.2, C66.9,                                                                                                                                                                                                                                                                                                                                                                                                                                                                                                                                                                                                                                                                                                                                                                                                                                                                                                                                                                                                                                                                                                                                                                                                                                                                                                                                                                                  |

|                                    |                                                                                                                                                                                                                                                                                                                                                                                                                                                                                                                                                                                                                                                                                                                                                                                                                                                   |
|------------------------------------|---------------------------------------------------------------------------------------------------------------------------------------------------------------------------------------------------------------------------------------------------------------------------------------------------------------------------------------------------------------------------------------------------------------------------------------------------------------------------------------------------------------------------------------------------------------------------------------------------------------------------------------------------------------------------------------------------------------------------------------------------------------------------------------------------------------------------------------------------|
|                                    | C68.0-68.1, C68.8, C75, C75.0-75.6, C75.8, D06, D06.0-06.1, D06.7, D06.9-07.2, D07.4, D09.2, D13.2-13.3, D14.0, D15-16, D15.0-15.2, D15.7, D15.9-16.9, D26.0-26.1, D26.7, D26.9, D28.0-28.1, D28.7, D29.0, D30.2, D30.4, D30.7-30.8, D31, D31.0-31.6, D31.9, D35-36, D35.0-35.2, D35.5-35.9, D36.1, D36.7, D37.2, D38.2-38.5, D39.2, D39.8, D41.2-41.3, D44.1-44.8, D48.0-48.4                                                                                                                                                                                                                                                                                                                                                                                                                                                                    |
| C57.9, C59                         | C03.0, C04.0, C05.0, C07.0, C17, C17.0-17.3, C17.8-17.9, C30-31, C30.0-30.3, C30.5, C30.8-31.3, C31.8-31.9, C37-38, C37.0-37.3, C38.0-38.4, C38.8, C48, C48.0-48.2, C48.8-48.9, C51-54, C51.0-51.2, C51.8-52.0, C52.9-53.1, C53.3-53.4, C53.8-54.4, C54.8-54.9, C56-57, C56.0-56.2, C56.4, C56.9-57.4, C57.7-57.8, C60, C60.0-60.2, C60.8-60.9, C63, C63.0-63.2, C63.7-63.8, C66, C66.0-66.2, C66.9, C68.0-68.1, C68.8, C75, C75.0-75.6, C75.8, D06, D06.0-06.1, D06.7, D06.9-07.2, D07.4, D09.2, D13.2-13.3, D14.0, D15-16, D15.0-15.2, D15.7, D15.9-16.9, D26.0-26.1, D26.7, D26.9-27.1, D27, D27.9-28.1, D28.7, D29.0, D30.2, D30.4, D30.7-30.8, D31, D31.0-31.6, D31.9, D35-36, D35.0-35.2, D35.5-35.9, D36.1, D36.7, D37.2, D38.2-38.5, D39.1-39.2, D39.8, D41.2-41.3, D44.1-44.8, D48.0-48.4                                                |
| C63.9                              | C03.0, C04.0, C05.0, C07.0, C17, C17.0-17.3, C17.8-17.9, C30-31, C30.0-30.3, C30.5, C30.8-31.3, C31.8-31.9, C37-38, C37.0-37.3, C38.0-38.4, C38.8, C48, C48.0-48.2, C48.8-48.9, C51-52, C51.0-51.2, C51.8-52.0, C52.9, C57, C57.0-57.4, C57.7-57.8, C60-63, C60.0-60.2, C60.8-61.0, C61.9-62.1, C62.9-63.2, C63.7-63.8, C66, C66.0-66.2, C66.9, C68.0-68.1, C68.8, C75, C75.0-75.6, C75.8, D07.4-07.5, D09.2, D13.2-13.3, D14.0, D15-16, D15.0-15.2, D15.7, D15.9-16.9, D28.0-28.1, D28.7, D29.0-29.4, D29.7-29.8, D30.2, D30.4, D30.7-30.8, D31, D31.0-31.6, D31.9, D35-36, D35.0-35.2, D35.5-35.9, D36.1, D36.7, D37.2, D38.2-38.5, D39.2, D39.8, D40.0-40.1, D40.7-40.8, D41.2-41.3, D44.1-44.8, D48.0-48.4                                                                                                                                    |
| C68, C68.9                         | C03.0, C04.0, C05.0, C07.0, C17, C17.0-17.3, C17.8-17.9, C30-31, C30.0-30.3, C30.5, C30.8-31.3, C31.8-31.9, C37-38, C37.0-37.3, C38.0-38.4, C38.8, C48, C48.0-48.2, C48.8-48.9, C51-52, C51.0-51.2, C51.8-52.0, C52.9, C57, C57.0-57.4, C57.7-57.8, C60, C60.0-60.2, C60.8-60.9, C63-67, C63.0-63.2, C63.7-63.8, C64.0-64.2, C64.4-64.6, C64.8-65.2, C65.9-66.2, C66.9-68.1, C68.8, C75, C75.0-75.6, C75.8, D07.4, D09.0, D09.2, D13.2-13.3, D14.0, D15-16, D15.0-15.2, D15.7, D15.9-16.9, D28.0-28.1, D28.7, D29.0, D30.0-30.4, D30.7-30.8, D31, D31.0-31.6, D31.9, D35-36, D35.0-35.2, D35.5-35.9, D36.1, D36.7, D37.2, D38.2-38.5, D39.2, D39.8, D41.0-41.4, D41.7-41.8, D44.1-44.8, D48.0-48.4, D49.4                                                                                                                                         |
| C75.9                              | C03.0, C04.0, C05.0, C07.0, C17, C17.0-17.3, C17.8-17.9, C30-31, C30.0-30.3, C30.5, C30.8-31.3, C31.8-31.9, C37-38, C37.0-37.3, C38.0-38.4, C38.8, C48, C48.0-48.2, C48.8-48.9, C51-52, C51.0-51.2, C51.8-52.0, C52.9, C57, C57.0-57.4, C57.7-57.8, C60, C60.0-60.2, C60.8-60.9, C63, C63.0-63.2, C63.7-63.8, C66, C66.0-66.2, C66.9, C68.0-68.1, C68.8, C73, C73.0-73.5, C73.8-73.9, C75, C75.0-75.6, C75.8, D07.4, D09.2-09.3, D09.8, D13.2-13.3, D14.0, D15-16, D15.0-15.2, D15.7, D15.9-16.9, D28.0-28.1, D28.7, D29.0, D30.2, D30.4, D30.7-30.8, D31, D31.0-31.6, D31.9, D34-36, D34.0, D34.9-35.2, D35.5-35.9, D36.1, D36.7, D37.2, D38.2-38.5, D39.2, D39.8, D41.2-41.3, D44.0-44.8, D48.0-48.4                                                                                                                                            |
| C76.0-76.1, C77.0-77.1, C78.0-78.3 | C00-13, C00.0-00.6, C00.8-01.0, C01.9-02.4, C02.8-03.1, C03.9-04.1, C04.8-05.2, C05.8-06.2, C06.8-07.0, C07.9-08.1, C08.8-09.1, C09.8-10.4, C10.8-11.3, C11.8-12.0, C12.9-13.2, C13.8-13.9, C15, C15.0-15.5, C15.8-15.9, C17, C17.0-17.3, C17.8-17.9, C30-34, C30.0-30.3, C30.5, C30.8-31.3, C31.8-32.3, C32.8-33.0, C33.2, C33.9-34.4, C34.7-34.9, C37-38, C37.0-37.3, C38.0-38.4, C38.8, C43-45, C43.0-45.9, C48, C48.0-48.2, C48.8-48.9, C50-52, C50.0-51.2, C51.8-52.0, C52.9, C57, C57.0-57.4, C57.7-57.8, C60, C60.0-60.2, C60.8-60.9, C63, C63.0-63.2, C63.7-63.8, C66, C66.0-66.2, C66.9, C68.0-68.1, C68.8, C70-73, C70.0-70.1, C70.5-70.6, C70.9-72.5, C72.8-73.5, C73.8-73.9, C75, C75.0-75.6, C75.8, D00.1, D02.0-02.3, D03-05, D03.0-05.1, D05.7-05.9, D07.4, D09.2-09.3, D09.8, D10.0-10.7, D11, D11.0, D11.7, D11.9, D13.0, D13.2- |



|                                                              |                                                                                                                                                                                                                                                                                                                                                                                                                                                                                                                                                                                                                                                                                                                                                                                                                                                                                                                                                                                                                                                                                                                                                |
|--------------------------------------------------------------|------------------------------------------------------------------------------------------------------------------------------------------------------------------------------------------------------------------------------------------------------------------------------------------------------------------------------------------------------------------------------------------------------------------------------------------------------------------------------------------------------------------------------------------------------------------------------------------------------------------------------------------------------------------------------------------------------------------------------------------------------------------------------------------------------------------------------------------------------------------------------------------------------------------------------------------------------------------------------------------------------------------------------------------------------------------------------------------------------------------------------------------------|
|                                                              | 13.3, D14.0-14.3, D15-16, D15.0-15.2, D15.7, D15.9-16.9, D22-24, D22.0-22.7, D22.9-23.7, D23.9-24.2, D24.9, D28.0-28.1, D28.7, D29.0, D30.2, D30.4, D30.7-30.8, D31, D31.0-31.6, D31.9, D34-36, D34.0, D34.9-35.2, D35.5-35.9, D36.1, D36.7, D37.2, D38.0-38.5, D39.2, D39.8, D41.2-41.3, D44.0-44.8, D48.0-48.6, D49.2-49.3                                                                                                                                                                                                                                                                                                                                                                                                                                                                                                                                                                                                                                                                                                                                                                                                                   |
| C76.2-76.3,<br>C77.2,<br>C77.5,<br>C78.4-78.8,<br>C79.0-79.1 | C02.0, C03.0, C04.0, C05.0, C07.0, C15-25, C15.0-15.5, C15.8-17.3, C17.8-19.0, C19.9-20.0, C20.8-21.2, C21.8-22.5, C22.7-22.8, C23.0, C23.9-24.1, C24.4, C24.8-25.4, C25.7-25.9, C30-31, C30.0-30.3, C30.5, C30.8-31.3, C31.8-31.9, C37-38, C37.0-37.3, C38.0-38.4, C38.8, C45, C45.0-45.9, C48, C48.0-48.2, C48.8-48.9, C51-54, C51.0-51.2, C51.8-52.0, C52.9-53.1, C53.3-53.4, C53.8-54.4, C54.8-54.9, C56-57, C56.0-56.2, C56.4, C56.9-57.4, C57.7-57.8, C60-61, C60.0-60.2, C60.8-61.0, C61.9, C63-67, C63.0-63.2, C63.7-63.8, C64.0-64.2, C64.4-64.6, C64.8-65.2, C65.9-66.2, C66.9-68.1, C68.8, C75, C75.0-75.6, C75.8, C82-86, C82.0-86.6, C88, C88.0-88.4, C88.7-88.9, C90, C90.0-90.9, C96, C96.0-96.9, D00.1-00.2, D01.0-01.3, D06, D06.0-06.1, D06.7, D06.9-07.2, D07.4-07.5, D09.0, D09.2, D12, D12.0-13.7, D14.0, D15-16, D15.0-15.2, D15.7, D15.9-16.9, D26.0-26.1, D26.7, D26.9-27.1, D27, D27.9-28.1, D28.7, D29.0-29.1, D30.0-30.4, D30.7-30.8, D31, D31.0-31.6, D31.9, D35-36, D35.0-35.2, D35.5-35.9, D36.1, D36.7, D37.1-37.5, D38.2-38.5, D39.1-39.2, D39.8, D40.0, D41.0-41.4, D41.7-41.8, D44.1-44.8, D48.0-48.4, D49.4 |

eTable 6: Cancer registry sources for cancer incidence and mortality-to-incidence ratio data by country, year, and registry

| Location  | Registry                                                                           | Years available from registry | Years used for incidence | Years available for MIR | Years used for MIR |
|-----------|------------------------------------------------------------------------------------|-------------------------------|--------------------------|-------------------------|--------------------|
| Algeria   | Algiers                                                                            | 1993-1997                     | 5                        | 1993-1997               | 0                  |
| Algeria   | Batna                                                                              | 2000-2006, 2008-2012          | 12                       | 2000-2006, 2008-2012    | 0                  |
| Algeria   | Oran                                                                               | 2005-2006                     | 2                        | 2005-2006               | 0                  |
| Algeria   | Setif                                                                              | 1986-1993, 1998-2011          | 22                       | 1986-1993, 1998-2011    | 0                  |
| Argentina | 6 Registries Combined (Bahia Blanca, Chaco, Cordoba, Entre Rios, Mendoza, Neuquen) | 1991-2013                     | 23                       | 1991-2013               | 0                  |
| Argentina | Concordia                                                                          | 1990-1997                     | 8                        | 1990-1997               | 0                  |
| Argentina | Cordoba                                                                            | 2004-2012                     | 9                        | 2004-2012               | 0                  |
| Argentina | Mendoza                                                                            | 2003-2014                     | 10                       | 2003-2012               | 0                  |
| Argentina | Tierra del Fuego                                                                   | 2003-2012                     | 10                       | 2003-2012               | 0                  |
| Argentina | Chaco                                                                              | 2008-2012                     | 5                        | 2008-2012               | 0                  |
| Argentina | Entre Rios Province                                                                | 2008-2011                     | 4                        | 2008-2011               | 0                  |
| Argentina | Bahia Blanca                                                                       | 1993-2007                     | 15                       | 1993-2007               | 0                  |
| Australia | Victoria                                                                           | 1983-2012                     | 30                       | 1983-2012               | 0                  |
| Australia | Western Australia                                                                  | 1983-2012                     | 30                       | 1983-2012               | 0                  |
| Australia | Queensland                                                                         | 1982-2015                     | 20                       | 1993-2012               | 0                  |
| Australia | National Registry                                                                  | 1982-2014                     | 33                       | 1968-2014               | 26                 |
| Australia | New South Wales                                                                    | 1983-2012                     | 30                       | 1983-2012               | 0                  |
| Australia | Capital Territory                                                                  | 1983-2007                     | 25                       | 1983-2007               | 0                  |
| Australia | Tasmania                                                                           | 1978-2012                     | 35                       | 1978-2012               | 0                  |
| Australia | Northern Territory                                                                 | 1998-2012                     | 15                       | 1998-2012               | 0                  |
| Australia | South Australia                                                                    | 1977-2012                     | 36                       | 1977-2012               | 0                  |
| Austria   | Carinthia                                                                          | 2008-2012                     | 5                        | 2008-2012               | 0                  |
| Austria   | Vorarlberg                                                                         | 1993-2012                     | 20                       | 1993-2012               | 0                  |
| Austria   | Tyrol                                                                              | 1988-2012                     | 25                       | 1988-2012               | 0                  |
| Austria   | National Registry                                                                  | 1983-2012                     | 30                       | 1983-2012               | 7                  |
| Bahrain   | National Registry                                                                  | 1998-2012                     | 15                       | 1998-2012               | 0                  |
| Belarus   | National Registry                                                                  | 1983-2012                     | 30                       | 1983-2012               | 0                  |
| Belarus   | Belarus Paediatric                                                                 | 1990-2014                     | 25                       | 1990-2014               | 0                  |
| Belgium   | Antwerp                                                                            | 1998-2002                     | 5                        | 1998-2002               | 0                  |
| Belgium   | Flanders                                                                           | 1998-2001                     | 4                        | 1998-2001               | 0                  |
| Belgium   | Flanders except Limburg                                                            | 1997-1998                     | 2                        | 1997-1998               | 0                  |
| Belgium   | Limburg                                                                            | 1997-1998                     | 2                        | 1997-1998               | 0                  |
| Belgium   | National Registry                                                                  | 2003-2013                     | 11                       | 2003-2013               | 0                  |

|                   |                      |                                    |    |                                    |    |
|-------------------|----------------------|------------------------------------|----|------------------------------------|----|
| Bermuda           | Bermuda              | 1975-2018                          | 44 | 1975-2018                          | 1  |
| Botswana          | National Registry    | 1999-2008                          | 10 | 1999-2008                          | 0  |
| Brazil            | Belem                | 1989-1991,<br>1996-2012            | 20 | 1989-1991,<br>1996-2012            | 0  |
| Brazil            | Santos               | 2008-2009                          | 2  | 2008-2009                          | 0  |
| Brazil            | Sao Paulo            | 1969, 1973,<br>1978, 1997-<br>2013 | 20 | 1969, 1973,<br>1978, 1997-<br>2013 | 0  |
| Brazil            | Barretos             | 2008-2013                          | 6  | 2008-2013                          | 0  |
| Brazil            | Palmas               | 2000-2012                          | 13 | 2000-2012                          | 0  |
| Brazil            | Aracaju              | 1996-2013                          | 18 | 1996-2013                          | 0  |
| Brazil            | Florianopolis        | 2008-2012                          | 5  | 2008-2012                          | 0  |
| Brazil            | Porto Alegre         | 1979-1982,<br>1987, 1990-<br>2006  | 22 | 1979-1982,<br>1987, 1990-<br>2006  | 0  |
| Brazil            | Roraima              | 2003-2010                          | 8  | 2003-2010                          | 0  |
| Brazil            | Natal                | 1999-2005                          | 7  | 1999-2005                          | 0  |
| Brazil            | Angra Dos Reis       | 2007-2008                          | 2  | 2007-2008                          | 0  |
| Brazil            | Teresina             | 2000-2006                          | 7  | 2000-2006                          | 0  |
| Brazil            | Recife               | 1968-1971,<br>1980, 1995-<br>2012  | 23 | 1968-1971,<br>1980, 1995-<br>2012  | 0  |
| Brazil            | Curitiba             | 1998-2012                          | 15 | 1998-2012                          | 0  |
| Brazil            | Joao Pessoa          | 1999-2012                          | 14 | 1999-2012                          | 0  |
| Brazil            | Cuiaba               | 2000-2009                          | 10 | 2000-2009                          | 0  |
| Brazil            | Mato Grosso Interior | 2001-2005                          | 5  | 2001-2005                          | 0  |
| Brazil            | Campo Grande         | 2000-2005,<br>2008-2010            | 7  | 2000-2003,<br>2008-2010            | 0  |
| Brazil            | Pocos de Caldas      | 2007-2011                          | 5  | 2007-2011                          | 0  |
| Brazil            | Belo Horizonte       | 2000-2011                          | 12 | 2000-2011                          | 0  |
| Brazil            | Goiania              | 1988-2012                          | 25 | 1988-2012                          | 0  |
| Brazil            | Espirito Santo       | 1997-2012                          | 16 | 1997-2012                          | 0  |
| Brazil            | Brasilia             | 1998-2001                          | 4  | 1998-2001                          | 0  |
| Brazil            | Distrito Federal     | 1999-2002                          | 4  | 1999-2002                          | 0  |
| Brazil            | Fortaleza            | 1978-1982,<br>1990-2009            | 25 | 1978-1982,<br>1990-2009            | 0  |
| Brazil            | Salvador             | 1996-2005                          | 10 | 1996-2005                          | 0  |
| Brazil            | Manaus               | 1999-2009                          | 11 | 1999-2009                          | 0  |
| Brazil            | Jahu                 | 1996-2015                          | 20 | 1996-2015                          | 0  |
| Brazil            | Campinas             | 1991-2005                          | 15 | 1991-2005                          | 0  |
| Brunei Darussalam | National Registry    | 2010-2012                          | 3  | 2010-2012                          | 0  |
| Bulgaria          | National Registry    | 1993-2012                          | 20 | 1993-2012                          | 12 |
| Cameroon          | Yaounde              | 2004-2006                          | 3  | 2004-2006                          | 0  |

|        |                                    |                                       |    |                                       |    |
|--------|------------------------------------|---------------------------------------|----|---------------------------------------|----|
| Canada | Nunavut                            | 2008-2012                             | 5  | 2008-2012                             | 0  |
| Canada | Yukon                              | 1983-1997,<br>2003-2012               | 25 | 1983-1997,<br>2003-2012               | 0  |
| Canada | Saskatchewan                       | 1960-1966,<br>1968-2014               | 54 | 1960-1966,<br>1968-2014               | 7  |
| Canada | Quebec                             | 1963-1966,<br>1969-1997,<br>2003-2007 | 38 | 1963-1966,<br>1969-1997,<br>2003-2007 | 0  |
| Canada | Prince Edward Island               | 1978-2012                             | 35 | 1978-2012                             | 0  |
| Canada | Ontario                            | 1969-1971,<br>1978-2012               | 38 | 1969-1971,<br>1978-2012               | 0  |
| Canada | Newfoundland                       | 1969-2002                             | 34 | 1969-2002                             | 0  |
| Canada | Nova Scotia                        | 1978-2012                             | 35 | 1978-2012                             | 0  |
| Canada | Northwest Territories              | 1983-2012                             | 30 | 1983-2012                             | 0  |
| Canada | National Registry                  | 1978-2007                             | 30 | 1978-2007                             | 0  |
| Canada | Maritime                           | 1969-1987                             | 19 | 1969-1987                             | 0  |
| Canada | New Brunswick                      | 1962-1966,<br>1978-2012               | 40 | 1962-1966,<br>1978-2012               | 0  |
| Canada | Newfoundland and<br>Labrador       | 1960-1966,<br>1969-2012               | 51 | 1960-1966,<br>1969-2012               | 0  |
| Canada | Manitoba                           | 1958-2012                             | 55 | 1958-2012                             | 0  |
| Canada | Northwest Territories<br>and Yukon | 1973-1987                             | 15 | 1973-1987                             | 0  |
| Canada | British Columbia                   | 1969-2013                             | 45 | 1969-2013                             | 0  |
| Canada | Alberta                            | 1960-1966,<br>1969-2012               | 51 | 1960-1966,<br>1969-2012               | 0  |
| Chile  | Los Rios                           | 2003-2007                             | 5  | 2003-2007                             | 0  |
| Chile  | Bio Bio                            | 2003-2012                             | 10 | 2003-2012                             | 0  |
| Chile  | Antofagasta                        | 2003-2010                             | 8  | 2003-2010                             | 0  |
| Chile  | National Registry                  | 1959-1961,<br>2007-2011               | 8  | 1959-1961,<br>2007-2011               | 1  |
| Chile  | Concepcion                         | 2008-2010                             | 3  | 2008-2010                             | 0  |
| Chile  | Valdivia                           | 1998-2012                             | 15 | 1998-2012                             | 0  |
| China  | Zhongshan County                   | 2004, 2006-<br>2007                   | 3  | 2004, 2006-<br>2007                   | 0  |
| China  | Beijing                            | 1990-2013                             | 23 | 1990-2012                             | 20 |
| China  | Chuzhou District, Huai'an          | 2004, 2006-<br>2007                   | 3  | 2004, 2006-<br>2007                   | 0  |
| China  | Hefei                              | 2010-2013                             | 3  | 2010-2012                             | 0  |
| China  | Ci County                          | 1990-2012                             | 23 | 1990-2012                             | 12 |
| China  | Qianxi County                      | 2009, 2011,<br>2013                   | 1  | 2009                                  | 1  |
| China  | Shexian County                     | 2003-2013                             | 10 | 2003-2012                             | 6  |
| China  | Tongling                           | 2008-2013                             | 5  | 2008-2012                             | 2  |

|       |                                                  |                                  |    |                      |    |
|-------|--------------------------------------------------|----------------------------------|----|----------------------|----|
| China | Ma'anshan                                        | 2003-2013                        | 10 | 2003-2012            | 7  |
| China | Jiulongpo District, Chongqing                    | 2004, 2007, 2009, 2011, 2013     | 3  | 2004, 2007, 2009     | 3  |
| China | Changle                                          | 1990-2009, 2011, 2013            | 20 | 1990-2009            | 19 |
| China | Sihui                                            | 1998-2009, 2011, 2013            | 12 | 1998-2009            | 12 |
| China | Xiamen City                                      | 2009, 2011                       | 1  | 2009                 | 1  |
| China | Jingtai County                                   | 2009, 2011, 2013                 | 1  | 2009                 | 0  |
| China | Liangzhou District                               | 2008-2009, 2011, 2013            | 2  | 2008-2009            | 2  |
| China | Wuwei                                            | 2004                             | 1  | 2004                 | 0  |
| China | Guangzhou City                                   | 2000-2013                        | 13 | 2000-2012            | 10 |
| China | Hong Kong Special Administrative Region of China | 1974-2013                        | 40 | 1974-2013            | 11 |
| China | Baoding                                          | 2009, 2011, 2013                 | 1  | 2009                 | 1  |
| China | Liuzhou                                          | 2009-2013                        | 4  | 2009-2012            | 1  |
| China | Fusui County                                     | 1990-1997, 2003-2009, 2011, 2013 | 15 | 1990-1997, 2003-2009 | 7  |
| China | Zhuhai                                           | 2010-2012                        | 3  | 2010-2012            | 0  |
| China | Jiangmen                                         | 2010-2013                        | 3  | 2010-2012            | 0  |
| China | Zhongshan                                        | 1998-2013                        | 15 | 1998-2012            | 12 |
| China | Shenzen City                                     | 2004, 2011, 2013                 | 1  | 2004                 | 0  |
| China | Feixi County                                     | 2009, 2011, 2013                 | 1  | 2009                 | 1  |
| China | Daoli District, Harbin City                      | 2005-2009, 2011, 2013            | 5  | 2005-2009            | 5  |
| China | Hai'an County                                    | 2009, 2011, 2013                 | 1  | 2009                 | 1  |
| China | Haimen                                           | 2003-2013                        | 10 | 2003-2012            | 7  |
| China | Huai'an District, Huai'an                        | 1998-2009, 2013                  | 12 | 1998-2009            | 12 |
| China | Huaiyin District, Huai'an                        | 2009-2013                        | 4  | 2009-2012            | 1  |
| China | Zhanggong District                               | 2009                             | 1  | 2009                 | 1  |
| China | Dehui                                            | 2009, 2011, 2013                 | 1  | 2009                 | 1  |
| China | Yanji                                            | 2009, 2011, 2013                 | 1  | 2009                 | 1  |
| China | Hengdong County                                  | 2009-2012                        | 4  | 2009-2012            | 1  |

|       |                 |                                   |    |                         |    |
|-------|-----------------|-----------------------------------|----|-------------------------|----|
| China | Anshan          | 1998-2013                         | 15 | 1998-2012               | 12 |
| China | Dalian City     | 1998-2009,<br>2011                | 12 | 1998-2009               | 12 |
| China | Dandong         | 2008-2009,<br>2011, 2013          | 2  | 2008-2009               | 2  |
| China | Donggang        | 2009, 2011                        | 1  | 2009                    | 1  |
| China | Shenyang City   | 2003-2012                         | 10 | 2003-2012               | 7  |
| China | Zhuanghe        | 2009, 2011,<br>2013               | 1  | 2009                    | 1  |
| China | Yunmeng County  | 2009, 2011,<br>2013               | 1  | 2009                    | 1  |
| China | Benxi           | 2003-2011,<br>2013                | 9  | 2003-2011               | 7  |
| China | Xining          | 2009, 2011,<br>2013               | 1  | 2009                    | 1  |
| China | Guanyun County  | 2004, 2007-<br>2013               | 7  | 2004, 2007-<br>2012     | 2  |
| China | Donghai County  | 2004, 2009,<br>2011, 2013         | 2  | 2004, 2009              | 1  |
| China | Suzhou          | 2006-2009,<br>2011, 2013          | 4  | 2006-2009               | 4  |
| China | Sheyang County  | 2008-2013                         | 5  | 2008-2012               | 2  |
| China | Qidong County   | 1990-2009,<br>2011                | 20 | 1990-2009               | 20 |
| China | Lianyungang     | 2004, 2007-<br>2013               | 7  | 2004, 2007-<br>2012     | 3  |
| China | Jintan District | 2003-2007,<br>2009, 2011,<br>2013 | 6  | 2003-2007,<br>2009      | 6  |
| China | Jinhu County    | 2007-2009,<br>2011, 2013          | 3  | 2007-2009               | 3  |
| China | Ganyu           | 2004, 2011,<br>2013               | 1  | 2004                    | 0  |
| China | Jianhu County   | 2003-2013                         | 10 | 2003-2012               | 7  |
| China | Yueyanglou      | 2009-2012                         | 4  | 2009-2012               | 0  |
| China | Qidong County   | 1983-1997,<br>2003-2012           | 25 | 1983-1997,<br>2003-2012 | 0  |
| China | Wuxi            | 2006, 2010-<br>2013               | 4  | 2006, 2010-<br>2012     | 1  |
| China | Dafeng          | 2003-2009,<br>2011, 2013          | 7  | 2003-2009               | 7  |
| China | Xuyi County     | 2009, 2011,<br>2013               | 1  | 2009                    | 1  |
| China | Yangzhong       | 1998-2009,<br>2011, 2013          | 12 | 1998-2009               | 12 |

|          |                                                                   |                                        |    |                         |    |
|----------|-------------------------------------------------------------------|----------------------------------------|----|-------------------------|----|
| China    | Chifeng                                                           | 2009, 2011                             | 1  | 2009                    | 1  |
| China    | Feicheng                                                          | 1998-2009,<br>2011, 2013               | 12 | 1998-2009               | 12 |
| China    | Changle                                                           | 2004, 2006-<br>2007                    | 3  | 2004, 2006-<br>2007     | 0  |
| China    | Wuhan City                                                        | 1990-2012                              | 23 | 1990-2012               | 17 |
| China    | Nangang District, Harbin<br>City                                  | 1992-2013                              | 21 | 1992-2012               | 13 |
| China    | Xianju County                                                     | 2009-2012                              | 4  | 2009-2012               | 1  |
| China    | Shangyu                                                           | 2009, 2011                             | 1  | 2009                    | 1  |
| China    | Jiaxing                                                           | 2000-2013                              | 13 | 2000-2012               | 10 |
| China    | Jiashan County                                                    | 1990-2013                              | 23 | 1990-2012               | 20 |
| China    | Hangzhou City                                                     | 2000-2013                              | 13 | 2000-2012               | 10 |
| China    | Haining                                                           | 1998-2009,<br>2011, 2013               | 12 | 1998-2009               | 12 |
| China    | Shangzhi                                                          | 2009, 2011,<br>2013                    | 1  | 2009                    | 1  |
| China    | Linzhou                                                           | 1990-2013                              | 23 | 1990-2012               | 20 |
| China    | Xiping County                                                     | 2009-2013                              | 4  | 2009-2012               | 1  |
| China    | Yanshi                                                            | 2009-2013                              | 4  | 2009-2012               | 1  |
| China    | Linqu County                                                      | 1998-2009,<br>2011                     | 12 | 1998-2009               | 12 |
| China    | Taixing                                                           | 2004-2005,<br>2007-2009,<br>2011, 2013 | 5  | 2004-2005,<br>2007-2009 | 5  |
| China    | Tianjin                                                           | 1981-2004,<br>2011, 2013               | 24 | 1981-2004               | 15 |
| China    | Qingyang District,<br>Chengdu                                     | 2009, 2011,<br>2013                    | 1  | 2009                    | 1  |
| China    | Shanghai                                                          | 1975, 1978-<br>2013                    | 36 | 1975, 1978-<br>2012     | 20 |
| China    | Yanting County                                                    | 1998-2013                              | 15 | 1998-2012               | 12 |
| China    | Wenshang County                                                   | 2009, 2011                             | 1  | 2009                    | 1  |
| China    | Ziliujing District                                                | 2009                                   | 1  | 2009                    | 1  |
| China    | Yangquan                                                          | 2009, 2011,<br>2013                    | 1  | 2009                    | 1  |
| China    | Yangcheng County                                                  | 2003-2009,<br>2011, 2013               | 7  | 2003-2009               | 7  |
| China    | Gejiu                                                             | 2004, 2008,<br>2011, 2013              | 2  | 2004, 2008              | 1  |
| China    | Kunes County                                                      | 2009                                   | 1  | 2009                    | 1  |
| Colombia | 4 Registries Combined<br>(Bucaramanga, Cali,<br>Manizales, Pasto) | 1992-2013                              | 22 | 1992-2013               | 0  |
| Colombia | Pasto                                                             | 2003-2012                              | 10 | 2003-2012               | 0  |

|               |                                                                                                                             |                                   |    |                                   |    |
|---------------|-----------------------------------------------------------------------------------------------------------------------------|-----------------------------------|----|-----------------------------------|----|
| Colombia      | National Registry                                                                                                           | 2003-2010                         | 8  | 2003-2010                         | 0  |
| Colombia      | Bucaramanga                                                                                                                 | 2003-2012                         | 10 | 2003-2012                         | 0  |
| Colombia      | Cali                                                                                                                        | 1962-2012                         | 51 | 1962-2012                         | 0  |
| Colombia      | Manizales                                                                                                                   | 2003-2012                         | 10 | 2003-2012                         | 0  |
| Costa Rica    | National Registry                                                                                                           | 1980-2012                         | 33 | 1980-2013                         | 0  |
| Croatia       | National Registry                                                                                                           | 1988-1991,<br>1993-2014           | 26 | 1988-1991,<br>1993-2014           | 8  |
| Cuba          | National Registry                                                                                                           | 1968-1977,<br>1986, 2000-<br>2012 | 24 | 1968-1977,<br>1986, 2000-<br>2012 | 0  |
| Cuba          | Villa Clara                                                                                                                 | 1995-1997,<br>2004-2007           | 7  | 1995-1997,<br>2004-2007           | 0  |
| Cyprus        | National Registry                                                                                                           | 1998-2012                         | 15 | 1998-2012                         | 4  |
| Cyprus        | South West                                                                                                                  | 1998-2012                         | 15 | 1998-2012                         | 0  |
| Czechia       | National Registry                                                                                                           | 1980-2012                         | 30 | 1983-2012                         | 5  |
| Denmark       | National Registry                                                                                                           | 1953-2014                         | 62 | 1953-2014                         | 35 |
| Ecuador       | Cuenca                                                                                                                      | 2003-2007                         | 5  | 2003-2007                         | 0  |
| Ecuador       | Quito                                                                                                                       | 1985-2012                         | 28 | 1985-2012                         | 0  |
| Ecuador       | Guayaquil                                                                                                                   | 2008-2012                         | 5  | 2008-2012                         | 0  |
| Ecuador       | Loja                                                                                                                        | 2008-2010                         | 3  | 2008-2010                         | 0  |
| Ecuador       | Manabi                                                                                                                      | 2008-2012                         | 5  | 2008-2012                         | 0  |
| Ecuador       | 5 Registries Combined<br>(Cuenca, Guayaquil, Loja,<br>Manabi, Quito)                                                        | 1993-2013                         | 21 | 1993-2013                         | 0  |
| Egypt         | Aswan                                                                                                                       | 2008                              | 1  | 2008                              | 0  |
| Egypt         | Damietta                                                                                                                    | 2009                              | 1  | 2009                              | 0  |
| Egypt         | Gharbiah                                                                                                                    | 1999-2007                         | 9  | 1999-2007                         | 0  |
| Egypt         | Minia                                                                                                                       | 2009                              | 1  | 2009                              | 0  |
| Estonia       | National Registry                                                                                                           | 1968-2012                         | 45 | 1968-2012                         | 5  |
| Ethiopia      | Addis Ababa                                                                                                                 | 2011-2016                         | 6  | 2011-2016                         | 0  |
| Faroe Islands | Faroe Islands                                                                                                               | 1960-2005                         | 46 | 1960-2006                         | 22 |
| Fiji          | National Registry                                                                                                           | 1998-2008                         | 11 | 1998-2008                         | 11 |
| Finland       | National Registry                                                                                                           | 1953-2014                         | 62 | 1953-2014                         | 35 |
| France        | Herault                                                                                                                     | 1986-2012                         | 26 | 1987-2012                         | 0  |
| France        | Somme                                                                                                                       | 1982-2012                         | 31 | 1982-2012                         | 0  |
| France        | Doubs                                                                                                                       | 1977-2012                         | 36 | 1977-2012                         | 0  |
| France        | Calvados                                                                                                                    | 1978-2012                         | 35 | 1978-2012                         | 0  |
| France        | France Paediatric                                                                                                           | 2000-2012                         | 13 | 2000-2012                         | 0  |
| France        | 13 Registries Combined<br>(Bas-Rhin, Calvados,<br>Doubs, Gironde, Haut-<br>Rhin, Herault, Isere, Lille,<br>Limousin, Loire- | 1993-2012                         | 20 | 1993-2012                         | 0  |



|                  |                                                                                                  |                      |    |                      |    |
|------------------|--------------------------------------------------------------------------------------------------|----------------------|----|----------------------|----|
|                  | Atlantique and Vendee, Manche, Somme, Tarn)                                                      |                      |    |                      |    |
| France           | Territoire de Belfort                                                                            | 2008-2012            | 5  | 2008-2012            | 0  |
| France           | Limousin                                                                                         | 2009-2012            | 4  | 2009-2012            | 0  |
| France           | Bas Rhin                                                                                         | 1975-2011            | 37 | 1975-2011            | 0  |
| France           | Isere                                                                                            | 1979-2012            | 34 | 1979-2012            | 0  |
| France           | Tarn                                                                                             | 1982-2012            | 31 | 1982-2012            | 0  |
| France           | Vendee                                                                                           | 1998-2012            | 15 | 1998-2012            | 0  |
| France           | Lille                                                                                            | 2008-2012            | 5  | 2008-2012            | 0  |
| France           | Manche                                                                                           | 1994-2011            | 18 | 1994-2011            | 0  |
| France           | Nord                                                                                             | 2005, 2008-2009      | 3  | 2005, 2008-2009      | 0  |
| France           | Gironde                                                                                          | 2008-2012            | 5  | 2008-2012            | 0  |
| France           | Haut Rhin                                                                                        | 1988-2012            | 25 | 1988-2012            | 0  |
| France           | Loire Atlantique                                                                                 | 1997-2012            | 16 | 1997-2012            | 0  |
| French Guiana    | National Registry                                                                                | 2008-2012            | 5  | 2008-2012            | 0  |
| French Polynesia | French Polynesia                                                                                 | 1998-2002            | 5  | 1998-2002            | 0  |
| Gambia           | National Registry                                                                                | 1987-1998, 2002-2011 | 22 | 1987-1998, 2002-2011 | 0  |
| Germany          | Saxony-Anhalt                                                                                    | 1998-2007            | 10 | 1998-2007            | 0  |
| Germany          | Rhineland Palatinate                                                                             | 2000-2012            | 13 | 2000-2012            | 0  |
| Germany          | Saarland                                                                                         | 1968-2012            | 45 | 1968-2012            | 30 |
| Germany          | Schleswig Holstein                                                                               | 1998-2012            | 15 | 1998-2012            | 2  |
| Germany          | Thuringen                                                                                        | 1998-2007            | 10 | 1998-2007            | 0  |
| Germany          | Bavaria                                                                                          | 2002-2012            | 11 | 2002-2012            | 0  |
| Germany          | Westphalia                                                                                       | 1998-2012            | 15 | 1998-2012            | 0  |
| Germany          | Mecklenburg                                                                                      | 1998-2007            | 10 | 1998-2007            | 0  |
| Germany          | Munich                                                                                           | 1998-2012            | 15 | 1998-2012            | 0  |
| Germany          | North Rhine Westphalia                                                                           | 1998-2007            | 10 | 1994-2007            | 2  |
| Germany          | 5 Western Registries Combined (Bavaria, Lower Saxony, Rhine-Pfalz, Saarland, Schleswig-Holstein) | 1994-2012            | 19 | 1994-2012            | 0  |
| Germany          | Mecklenburg-West Pomerania                                                                       | 1998-2007            | 10 | 1998-2007            | 0  |
| Germany          | Germany Paediatric                                                                               | 1980-1990, 1996-2012 | 17 | 1996-2012            | 0  |
| Germany          | Berlin                                                                                           | 1998-2007            | 10 | 1998-2007            | 0  |
| Germany          | Brandenburg                                                                                      | 1998-2007            | 10 | 1998-2007            | 0  |
| Germany          | Bremen                                                                                           | 2000-2012            | 13 | 2000-2012            | 0  |
| Germany          | Eastern States (former GDR)                                                                      | 1964-1966, 1968-1989 | 25 | 1964-1966, 1968-1989 | 0  |
| Germany          | Free State of Saxony                                                                             | 1998-2007            | 10 | 1998-2007            | 0  |

|           |                                  |                                                     |    |                                       |    |
|-----------|----------------------------------|-----------------------------------------------------|----|---------------------------------------|----|
| Germany   | Hamburg                          | 1969-1979,<br>1995-2012                             | 29 | 1969-1979,<br>1995-2012               | 2  |
| Germany   | Lower Saxony                     | 2003-2012                                           | 10 | 2003-2012                             | 0  |
| Germany   | National Registry                | 1991-2014                                           | 11 | 2000-2010                             | 11 |
| Greenland | Greenland                        | 1980-2014                                           | 35 | 1980-2014                             | 32 |
| Grenada   | St. George's Central<br>Hospital | 1996-2000                                           | 5  | 1996-2000                             | 0  |
| Guinea    | Conakry                          | 1992-1995,<br>2001-2010                             | 14 | 1992-1995,<br>2001-2010               | 0  |
| Hungary   | National Registry                | 1977-1999,<br>2001-2011                             | 11 | 2001-2011                             | 0  |
| Hungary   | County Szabolcs-Szatmar          | 1962-1966,<br>1969-1971,<br>1973-1987               | 23 | 1962-1966,<br>1969-1971,<br>1973-1987 | 0  |
| Hungary   | County Vas                       | 1962-1966,<br>1968-1987                             | 25 | 1962-1966,<br>1968-1987               | 0  |
| Hungary   | Miskolc                          | 1962-1966                                           | 5  | 1962-1966                             | 0  |
| Iceland   | National Registry                | 1955-2014                                           | 60 | 1955-2014                             | 35 |
| India     | Wardha                           | 2010-2014                                           | 5  |                                       | 0  |
| India     | Karunagappally                   | 1991-2007                                           | 24 |                                       | 0  |
| India     | Kollam                           | 2006-2014                                           | 9  |                                       | 0  |
| India     | Tamil Nadu                       | 2012-2013                                           | 2  |                                       | 0  |
| India     | Tripura                          | 2010-2014                                           | 5  |                                       | 0  |
| India     | Kamrup Urban                     | 2005-2014                                           | 10 |                                       | 0  |
| India     | Silchar                          | 2005-2006                                           | 5  |                                       | 0  |
| India     | Delhi                            | 1990-1996,<br>1998-2009,<br>2012                    | 17 |                                       | 0  |
| India     | Ahmedabad Urban                  | 2009-2010,<br>2012-2013                             | 18 |                                       | 0  |
| India     | Bangalore                        | 1982-2012                                           | 31 |                                       | 0  |
| India     | Kerala, Urban                    |                                                     | 22 |                                       | 0  |
| India     | Bhopal                           | 1990-1996,<br>2004-2013                             | 10 |                                       | 0  |
| India     | Barshi Rural                     | 1988-1992,<br>2003-2014                             | 17 |                                       | 0  |
| India     | Barshi Expanded                  | 1990-1996,<br>2009, 2012                            | 2  |                                       | 0  |
| India     | Mumbai                           | 1964-1966,<br>1968-1975,<br>1978-2012               | 43 |                                       | 0  |
| India     | Nagpur                           | 1980-1982,<br>1993-2002,<br>2005-2009,<br>2012-2013 | 20 |                                       | 0  |

|                            |                            |                                                     |    |           |   |
|----------------------------|----------------------------|-----------------------------------------------------|----|-----------|---|
| India                      | Pune                       | 1973-1982,<br>1993-2013                             | 31 |           | 0 |
| India                      | Manipur Excl Imphal West   | 2009-2010,<br>2012-2014                             | 7  |           | 0 |
| India                      | Aurangabad                 | 2005-2010,<br>2012-2014                             | 9  |           | 0 |
| India                      | S.A.S Nagar District       | 2013-2014                                           | 2  |           | 0 |
| India                      | Patiala District           | 2012-2014                                           | 3  |           | 0 |
| India                      | Ahmedabad Rural            | 2009-2010                                           | 16 |           | 0 |
| India                      | Kolkata                    | 2005-2009,<br>2012                                  | 6  |           | 0 |
| India                      | Chennai                    | 1982-2013                                           | 32 |           | 0 |
| India                      | Chandigarh Union Territory | 2013-2014                                           | 2  |           | 0 |
| India                      | Pasighat                   | 2012-2014                                           | 3  |           | 0 |
| India                      | Naharlagun Excl Papum Pare | 2012-2014                                           | 3  |           | 0 |
| India                      | Papum Pare                 | 2012-2014                                           | 3  |           | 0 |
| India                      | Cachar                     | 2007-2014                                           | 8  |           | 0 |
| India                      | Sikkim                     | 2003-2014                                           | 12 |           | 0 |
| India                      | Ahmedabad                  | 1983-1987,<br>1993-1997,<br>2004-2005,<br>2008-2011 | 16 |           | 0 |
| India                      | Trivandrum                 | 1991-2002,<br>2005-2014                             | 22 |           | 0 |
| India                      | Dibrugarh                  | 2005-2014                                           | 10 |           | 0 |
| India                      | Imphal                     | 2005-2006,<br>2009-2010,<br>2012-2014               | 5  |           | 0 |
| India                      | Aizawl                     | 2005-2008,<br>2012-2014                             | 6  |           | 0 |
| India                      | Sangrur District           | 2013-2014                                           | 2  |           | 0 |
| India                      | Manipur                    | 2006-2010                                           | 5  |           | 0 |
| India                      | Mizoram Excl Aizawl        | 2005-2006,<br>2012-2014                             | 5  |           | 0 |
| India                      | Mansa District             | 2013-2014                                           | 2  |           | 0 |
| India                      | Nagaland                   | 2010, 2012-<br>2014                                 | 4  |           | 0 |
| India                      | Mizoram                    | 2003-2012                                           | 10 |           | 0 |
| India                      | Meghalaya                  | 2010-2014                                           | 5  |           | 0 |
| India                      | Dindigul Ambilikkai        | 2003-2013                                           | 11 |           | 0 |
| Iran (Islamic Republic of) | Bushehr                    | 2001-2010                                           | 10 | 2001-2010 | 0 |
| Iran (Islamic Republic of) | Alborz                     | 2002-2010                                           | 9  | 2002-2010 | 0 |

|                            |                             |                                    |    |                                    |   |
|----------------------------|-----------------------------|------------------------------------|----|------------------------------------|---|
| Iran (Islamic Republic of) | Khorasan-e-Razavi           | 2000-2010                          | 11 | 2000-2010                          | 0 |
| Iran (Islamic Republic of) | West Azarbajejan            | 2000-2010                          | 11 | 2000-2010                          | 0 |
| Iran (Islamic Republic of) | East Azarbajejan            | 2000-2010                          | 11 | 2000-2010                          | 0 |
| Iran (Islamic Republic of) | Ardebil                     | 2000-2010                          | 11 | 2000-2010                          | 0 |
| Iran (Islamic Republic of) | Golestan                    | 1996-2000,<br>2004-2011            | 12 | 1996-2000,<br>2005-2011            | 0 |
| Iran (Islamic Republic of) | North Khorasan              | 2000, 2002-<br>2010                | 10 | 2000, 2002-<br>2010                | 0 |
| Iran (Islamic Republic of) | National Registry           | 2003-2007                          | 5  | 2003-2007                          | 0 |
| Iran (Islamic Republic of) | South Khorasan              | 2001-2010                          | 10 | 2001-2010                          | 0 |
| Iran (Islamic Republic of) | Khuzestan                   | 2000-2010                          | 11 | 2000-2010                          | 0 |
| Iran (Islamic Republic of) | Kohgiluyeh and Boyer-Ahmad  | 2000-2010                          | 11 | 2000-2010                          | 0 |
| Iran (Islamic Republic of) | Kurdistan                   | 2000-2010                          | 11 | 2000-2010                          | 0 |
| Iran (Islamic Republic of) | Lorestan                    | 2000-2010                          | 11 | 2000-2010                          | 0 |
| Iran (Islamic Republic of) | Markazi                     | 2001-2010                          | 10 | 2001-2010                          | 0 |
| Iran (Islamic Republic of) | Mazandaran                  | 2000-2010                          | 11 | 2000-2010                          | 0 |
| Iran (Islamic Republic of) | Ardabil                     | 1985, 1996-<br>1999, 2006-<br>2008 | 8  | 1985, 1996-<br>1999, 2006-<br>2008 | 0 |
| Iran (Islamic Republic of) | Qom                         | 2000-2010                          | 11 | 2000-2010                          | 0 |
| Iran (Islamic Republic of) | Semnan                      | 2000-2010                          | 11 | 2000-2010                          | 0 |
| Iran (Islamic Republic of) | Sistan and Baluchistan      | 2001-2010                          | 10 | 2001-2010                          | 0 |
| Iran (Islamic Republic of) | Tehran                      | 2000-2010                          | 11 | 2000-2010                          | 0 |
| Iran (Islamic Republic of) | Yazd                        | 2000-2010                          | 11 | 2000-2010                          | 0 |
| Iran (Islamic Republic of) | Zanjan                      | 2000-2010                          | 11 | 2000-2010                          | 0 |
| Iran (Islamic Republic of) | Qazvin                      | 2000-2010                          | 11 | 2000-2010                          | 0 |
| Iran (Islamic Republic of) | Kermanshah                  | 2000-2010                          | 11 | 2000-2010                          | 0 |
| Iran (Islamic Republic of) | Kerman                      | 2000-2010                          | 11 | 2000-2010                          | 0 |
| Iran (Islamic Republic of) | Isfahan                     | 2000-2010                          | 11 | 2000-2010                          | 0 |
| Iran (Islamic Republic of) | Ilam                        | 2000-2010                          | 11 | 2000-2010                          | 0 |
| Iran (Islamic Republic of) | Hormozgan                   | 2001-2010                          | 10 | 2001-2010                          | 0 |
| Iran (Islamic Republic of) | Hamadan                     | 2000-2010                          | 11 | 2000-2010                          | 0 |
| Iran (Islamic Republic of) | Golestan                    | 2000-2010                          | 11 | 2000-2010                          | 0 |
| Iran (Islamic Republic of) | Gilan                       | 2000-2010                          | 11 | 2000-2010                          | 0 |
| Iran (Islamic Republic of) | Fars                        | 2000-2010                          | 11 | 2000-2010                          | 0 |
| Iran (Islamic Republic of) | Chahar Mahaal and Bakhtiari | 2000-2010                          | 11 | 2000-2010                          | 0 |
| Iraq                       | National Registry           | 2007, 2009,<br>2011                | 3  | 2007, 2009,<br>2011                | 0 |
| Ireland                    | National Registry           | 1994-2012                          | 19 | 1994-2012                          | 0 |
| Ireland                    | Ireland (Southern)          | 1980-1986,<br>1988-1992            | 12 | 1980-1986,<br>1988-1992            | 0 |

|         |                        |                                       |    |                                       |   |
|---------|------------------------|---------------------------------------|----|---------------------------------------|---|
| Israel  | National Registry      | 1960-1963,<br>1990-2012               | 27 | 1960-1963,<br>1990-2012               | 0 |
| Italy   | Romagna                | 1986-2002                             | 17 | 1986-2002                             | 0 |
| Italy   | Ragusa                 | 1981-2002                             | 22 | 1981-2002                             | 0 |
| Italy   | Syracuse               | 1999-2002                             | 4  | 1999-2002                             | 0 |
| Italy   | Salerno                | 1998-2001                             | 4  | 1998-2001                             | 0 |
| Italy   | Naples                 | 1998-2002                             | 5  | 1998-2002                             | 0 |
| Italy   | Latina                 | 1983-1985,<br>1988-1991               | 7  | 1983-1985,<br>1988-1991               | 0 |
| Italy   | Macerata               | 1991-2000                             | 10 | 1991-2000                             | 0 |
| Italy   | Umbria                 | 1994-1996,<br>1998-2006               | 12 | 1994-1996,<br>1998-2006               | 1 |
| Italy   | Florence               | 1985-2002                             | 18 | 1985-2002                             | 0 |
| Italy   | Florence and Prato     | 1985-2002                             | 18 | 1985-2002                             | 0 |
| Italy   | Ferrara                | 1991-2002                             | 12 | 1991-2002                             | 0 |
| Italy   | Sassari                | 1993-2002                             | 10 | 1993-2002                             | 0 |
| Italy   | Reggio Emilia          | 1998-2002                             | 5  | 1998-2002                             | 0 |
| Italy   | North East Italy       | 1995-2002                             | 8  | 1995-2002                             | 0 |
| Italy   | Modena                 | 1988-2007                             | 20 | 1988-2007                             | 0 |
| Italy   | Trieste                | 1984-1985,<br>1989-1992               | 6  | 1984-1985,<br>1989-1992               | 0 |
| Italy   | Veneto                 | 1988-1996,<br>1998-2001               | 13 | 1988-1996,<br>1998-2001               | 0 |
| Italy   | Brescia                | 1999-2001                             | 3  | 1999-2001                             | 0 |
| Italy   | Varese                 | 1976-2000                             | 25 | 1976-2000                             | 0 |
| Italy   | Sondrio                | 1998-2007                             | 10 | 1998-2007                             | 0 |
| Italy   | Milan                  | 1999-2002                             | 4  | 1999-2002                             | 0 |
| Italy   | Genoa                  | 1986-1996,<br>1998-2000               | 14 | 1986-1996,<br>1998-2000               | 0 |
| Italy   | Torino                 | 1985-2002                             | 18 | 1985-2002                             | 0 |
| Italy   | Biella                 | 1995-2002                             | 8  | 1995-2002                             | 0 |
| Italy   | National Registry      | 1986-2013                             | 28 | 1986-2013                             | 4 |
| Italy   | Parma                  | 1978-2002                             | 25 | 1978-2002                             | 0 |
| Jamaica | National Registry      | 1978-1982,<br>1988-1997               | 15 | 1978-1982,<br>1988-1997               | 0 |
| Jamaica | Kingston and St Andrew | 1958-1977,<br>2003-2011               | 29 | 1958-1977,<br>2003-2011               | 0 |
| Japan   | Tochigi                | 2008-2012                             | 5  | 2008-2012                             | 0 |
| Japan   | Nagasaki               | 1973-2012                             | 40 | 1973-2012                             | 0 |
| Japan   | Saga                   | 1984-1986,<br>1988-1997,<br>2003-2007 | 18 | 1984-1986,<br>1988-1997,<br>2003-2007 | 0 |
| Japan   | Fukuoka                | 1974-1975                             | 2  | 1974-1975                             | 0 |

|               |                   |                                                     |    |                                                     |    |
|---------------|-------------------|-----------------------------------------------------|----|-----------------------------------------------------|----|
| Japan         | Hiroshima         | 1978-2000,<br>2003-2012                             | 33 | 1978-2000,<br>2003-2012                             | 0  |
| Japan         | Okayama           | 1966, 1969                                          | 2  | 1966, 1969                                          | 0  |
| Japan         | Osaka             | 1963-2002,<br>2008-2012                             | 45 | 1963-2002,<br>2008-2012                             | 0  |
| Japan         | Aichi             | 1998-2012                                           | 15 | 1998-2012                                           | 1  |
| Japan         | Fukui             | 1998-2012                                           | 15 | 1998-2012                                           | 0  |
| Japan         | Niigata           | 2003-2012                                           | 10 | 2003-2012                                           | 0  |
| Japan         | Miyagi            | 1959-1960,<br>1962-1964,<br>1968-1971,<br>1973-2010 | 47 | 1959-1960,<br>1962-1964,<br>1968-1971,<br>1973-2010 | 0  |
| Japan         | Yamagata          | 1983-2002,<br>2008-2012                             | 25 | 1983-2002,<br>2008-2012                             | 0  |
| Japan         | National Registry | 1975-2010                                           | 36 | 1958-2013                                           | 36 |
| Jordan        | National Registry | 1996-1998,<br>2001-2008                             | 8  | 2001-2008                                           | 0  |
| Kenya         | Eldoret           | 2000-2011                                           | 12 | 2000-2011                                           | 0  |
| Kenya         | Nairobi           | 2000-2002,<br>2004-2012                             | 12 | 2000-2002,<br>2004-2012                             | 0  |
| Kuwait        | National Registry | 1979-2012                                           | 34 | 1979-2012                                           | 0  |
| Kyrgyzstan    | National Registry | 1986-1987                                           | 2  | 1986-1987                                           | 0  |
| La Martinique | La Martinique     | 1981-1987,<br>1993-2002,<br>2008-2012               | 22 | 1981-1987,<br>1993-2002,<br>2008-2012               | 0  |
| La Reunion    | La Reunion        | 1988-1994,<br>2002-2011                             | 17 | 1988-1994,<br>2002-2011                             | 0  |
| Latvia        | National Registry | 1983-2007,<br>2010-2012                             | 28 | 1983-2007,<br>2010-2012                             | 5  |
| Lebanon       | National Registry | 1998, 2005-<br>2007                                 | 4  | 1998, 2005-<br>2007                                 | 0  |
| Libya         | Benghazi          | 2003-2005                                           | 3  | 2003-2005                                           | 0  |
| Lithuania     | National Registry | 1978-2012                                           | 35 | 1978-2012                                           | 3  |
| Malawi        | Blantyre          | 1994-1998,<br>2003-2010                             | 13 | 1994-1998,<br>2003-2010                             | 0  |
| Malaysia      | National Registry | 2003                                                | 1  | 2003                                                | 0  |
| Malaysia      | Penang            | 1998-2002,<br>2004-2010                             | 12 | 1998-2002,<br>2004-2010                             | 0  |
| Malaysia      | Sarawak           | 1998-2002                                           | 5  | 1998-2002                                           | 0  |
| Mali          | Bamako            | 1987-1992,<br>1994-1996,<br>2005-2014               | 19 | 1987-1992,<br>1994-1996,<br>2005-2014               | 0  |
| Malta         | National Registry | 1969-1972,<br>1992-2012                             | 25 | 1969-1972,<br>1992-2012                             | 16 |
| Mauritius     | National Registry | 2003-2012                                           | 10 | 2003-2012                                           | 0  |

|                                     |                                                            |                      |    |                      |    |
|-------------------------------------|------------------------------------------------------------|----------------------|----|----------------------|----|
| Mongolia                            | National Registry                                          | 2003-2007            | 5  | 2003-2007            | 0  |
| Morocco                             | 2 Registries Combined (Casablanca, Rabat)                  | 2005-2012            | 8  | 2005-2012            | 0  |
| Morocco                             | Greater Casablanca                                         | 2004                 | 1  | 2004                 | 0  |
| Mozambique                          | Lourenco Marques                                           | 1956-1960            | 5  | 1956-1960            | 0  |
| Namibia                             | National Registry                                          | 2000-2014            | 15 | 2000-2014            | 0  |
| Netherland Antilles excluding Aruba | Antilles except Aruba                                      | 1973-1982            | 10 | 1973-1982            | 0  |
| Netherlands                         | Eindhoven                                                  | 1973-2007            | 35 | 1973-2007            | 0  |
| Netherlands                         | Maastricht                                                 | 1986-2002            | 17 | 1986-2002            | 0  |
| Netherlands                         | Three Provinces Combined (Eindhoven, Maastricht, Antilles) | 1960-1962            | 3  | 1960-1962            | 0  |
| Netherlands                         | National Registry                                          | 1989-2018            | 25 | 1989-2013            | 0  |
| New Zealand                         | New Zealand non-Maori population                           | 1993-2014            | 22 | 1993-2014            | 19 |
| New Zealand                         | New Zealand Maori population                               | 1995-2014            | 20 | 1995-2014            | 19 |
| New Zealand                         | National Registry                                          | 1983-2015            | 33 | 1983-2015            | 5  |
| Niger                               | Niamey                                                     | 2001-2009            | 9  | 2001-2009            | 0  |
| Nigeria                             | Calabar                                                    | 2009-2013            | 5  | 2009-2013            | 0  |
| Nigeria                             | Ibadan                                                     | 1960-1969, 2003-2012 | 20 | 1960-1969, 2003-2012 | 0  |
| Norway                              | Buskerud                                                   | 1953-2015            | 63 | 1953-2015            | 36 |
| Norway                              | Nordland                                                   | 1953-2015            | 63 | 1953-2015            | 36 |
| Norway                              | Troms                                                      | 1953-2015            | 63 | 1953-2015            | 36 |
| Norway                              | Finmark                                                    | 1953-2015            | 63 | 1953-2015            | 36 |
| Norway                              | Trondelag                                                  | 1953-2015            | 63 | 1953-2015            | 36 |
| Norway                              | Ostfold                                                    | 1953-2015            | 63 | 1953-2015            | 36 |
| Norway                              | Oppland                                                    | 1953-2015            | 63 | 1953-2015            | 36 |
| Norway                              | Vestfold                                                   | 1953-2015            | 63 | 1953-2015            | 36 |
| Norway                              | Hordaland                                                  | 1953-2015            | 63 | 1953-2015            | 36 |
| Norway                              | Rogaland                                                   | 1953-2015            | 63 | 1953-2015            | 36 |
| Norway                              | Hedemark                                                   | 1953-2015            | 63 | 1953-2015            | 36 |
| Norway                              | Akershus                                                   | 1953-2015            | 63 | 1953-2015            | 36 |
| Norway                              | Oslo                                                       | 1953-2015            | 63 | 1953-2015            | 36 |
| Norway                              | Vest-Agder                                                 | 1953-2015            | 63 | 1953-2015            | 36 |
| Norway                              | Aust-Agder                                                 | 1953-2015            | 63 | 1953-2015            | 36 |
| Norway                              | National Registry                                          | 1953-2014            | 62 | 1953-2014            | 35 |
| Norway                              | Telemark                                                   | 1953-2015            | 63 | 1953-2015            | 36 |
| Norway                              | More og Romsdal                                            | 1953-2015            | 63 | 1953-2015            | 36 |
| Norway                              | Sogn og Fjordane                                           | 1953-2015            | 63 | 1953-2015            | 36 |
| Oman                                | National Registry                                          | 1993-2013            | 21 | 1993-2013            | 0  |

|                   |                          |                                       |    |                                       |    |
|-------------------|--------------------------|---------------------------------------|----|---------------------------------------|----|
| Pakistan          | Karachi                  | 1995-2002                             | 8  | 1995-2002                             | 0  |
| Pakistan          | South Karachi            | 1995-2002                             | 8  | 1995-2002                             | 0  |
| Palestine         | West Bank                | 2010-2011                             | 2  | 2010-2011                             | 0  |
| Panama            | National Registry        | 1988-1999,<br>2001-2011               | 23 | 1988-2011                             | 12 |
| Paraguay          | Asuncion Region          | 1988-1989                             | 2  | 1988-1989                             | 0  |
| Peru              | Trujillo                 | 1984-1990,<br>1996-2002               | 14 | 1984-1990,<br>1996-2002               | 1  |
| Peru              | Lima                     | 1990-1991,<br>2010-2012               | 5  | 1990-1991,<br>2010-2012               | 0  |
| Philippines       | Rizal                    | 1978-1987,<br>1993-1997               | 15 | 1978-1987,<br>1993-1997               | 0  |
| Philippines       | Manila                   | 1983-2002                             | 20 | 1983-2002                             | 0  |
| Poland            | Cieszyn and Nowy Sacz    | 1968-1972                             | 5  | 1968-1972                             | 0  |
| Poland            | Katowice                 | 1965-1966,<br>1970-1974               | 7  | 1965-1966,<br>1970-1974               | 0  |
| Poland            | Cieszyn                  | 1973-1977                             | 5  | 1973-1977                             | 0  |
| Poland            | Opole                    | 1985-1987                             | 3  | 1985-1987                             | 0  |
| Poland            | Warsaw Urban             | 1965-1966,<br>1968-1977,<br>1980-2002 | 35 | 1965-1966,<br>1968-1977,<br>1980-2002 | 0  |
| Poland            | Warsaw Rural             | 1968-1977,<br>1983-1987               | 15 | 1968-1977,<br>1983-1987               | 0  |
| Poland            | Warsaw                   | 1988-2002                             | 15 | 1988-2002                             | 0  |
| Poland            | Cracow                   | 1973-2002                             | 30 | 1973-2002                             | 0  |
| Poland            | Nowy Sacz                | 1973-1981,<br>1983-1986               | 13 | 1973-1981,<br>1983-1986               | 0  |
| Poland            | Four Rural Areas         | 1965-1966                             | 2  | 1965-1966                             | 0  |
| Poland            | Cracow City and District | 1965-1966,<br>1968-1972               | 7  | 1965-1966,<br>1968-1972               | 0  |
| Poland            | National Registry        | 1999-2011                             | 13 | 1999-2011                             | 13 |
| Poland            | Kielce                   | 1988-1996,<br>1998-2002               | 14 | 1988-1996,<br>1998-2002               | 0  |
| Poland            | Lower Silesia            | 1984-1997                             | 14 | 1984-1997                             | 0  |
| Portugal          | South Portugal           | 1998-2007                             | 10 | 1998-2007                             | 0  |
| Portugal          | Vila Nova de Gaia        | 1983-1987,<br>1993-1997               | 10 | 1983-1987,<br>1993-1997               | 0  |
| Portugal          | Porto                    | 1998-2002                             | 5  | 1998-2002                             | 0  |
| Portugal          | North Portugal           | 2000-2006                             | 7  | 2000-2006                             | 7  |
| Portugal          | Centre                   | 2003-2007                             | 5  | 2003-2007                             | 5  |
| Portugal          | Azores                   | 1997-2011                             | 15 | 1981-2012                             | 15 |
| Portugal          | National Registry        | 1991-2012                             | 22 | 1991-2012                             | 0  |
| Qatar             | National Registry        | 2003-2012                             | 10 | 2003-2012                             | 0  |
| Republic of Korea | Daejeon                  | 1998-2012                             | 15 | 1998-2012                             | 0  |



|                    |                               |                         |    |                         |    |
|--------------------|-------------------------------|-------------------------|----|-------------------------|----|
| Republic of Korea  | Busan                         | 1996-2012               | 17 | 1996-2012               | 0  |
| Republic of Korea  | Daegu                         | 1997-2012               | 16 | 1997-2012               | 0  |
| Republic of Korea  | Gwangju                       | 1998-2012               | 15 | 1998-2012               | 0  |
| Republic of Korea  | Incheon                       | 1998-2012               | 15 | 1998-2012               | 0  |
| Republic of Korea  | Jejudo                        | 2000-2002,<br>2004-2012 | 12 | 2000-2002,<br>2004-2012 | 0  |
| Republic of Korea  | National Registry             | 1999-2012               | 14 | 1999-2012               | 0  |
| Republic of Korea  | Seoul                         | 1993-2012               | 20 | 1993-2012               | 0  |
| Republic of Korea  | Ulsan                         | 1999-2012               | 14 | 1999-2012               | 0  |
| Republic of Korea  | Kangwha County                | 1986-1997               | 12 | 1986-1997               | 0  |
| Romania            | Timisoara                     | 2008                    | 1  | 2008                    | 0  |
| Romania            | County Cluj                   | 1974-1987               | 14 | 1974-1987               | 0  |
| Romania            | Cluj                          | 2007                    | 1  | 2007                    | 1  |
| Romania            | County Timis                  | 1970-1972               | 3  | 1970-1972               | 0  |
| Romania            | Banat Region                  | 1967                    | 1  | 1967                    | 0  |
| Russian Federation | Chukchi autonomous area       | 2007-2008,<br>2010-2015 | 8  | 2007-2016               | 7  |
| Russian Federation | Ulyanovsk oblast              | 2007-2016               | 10 | 2007-2016               | 10 |
| Russian Federation | Saratov oblast                | 2007-2016               | 10 | 2007-2016               | 10 |
| Russian Federation | Samara oblast                 | 2007-2016               | 10 | 2007-2016               | 10 |
| Russian Federation | Penza oblast                  | 2007-2016               | 10 | 2007-2016               | 10 |
| Russian Federation | Orenburg oblast               | 2007-2016               | 10 | 2007-2016               | 10 |
| Russian Federation | Nizhny Novgorod oblast        | 2007-2016               | 10 | 2007-2016               | 10 |
| Russian Federation | Kurgan oblast                 | 2007-2016               | 10 | 2007-2016               | 10 |
| Russian Federation | Kirov oblast                  | 2007-2016               | 10 | 2007-2016               | 10 |
| Russian Federation | Kemerovo oblast               | 2007-2016               | 10 | 2007-2016               | 10 |
| Russian Federation | Irkutsk oblast                | 2007-2016               | 10 | 2007-2016               | 10 |
| Russian Federation | Krasnoyarsk kray              | 2007-2016               | 10 | 2007-2016               | 10 |
| Russian Federation | Zabaikalsk kray               | 2007-2016               | 10 | 2007-2016               | 10 |
| Russian Federation | Perm kray                     | 2007-2016               | 10 | 2007-2016               | 10 |
| Russian Federation | Chuvash Republic              | 2007-2016               | 10 | 2007-2016               | 10 |
| Russian Federation | Novosibirsk oblast            | 2007-2016               | 10 | 2007-2016               | 10 |
| Russian Federation | Sverdlovsk oblast             | 2007-2016               | 10 | 2007-2016               | 10 |
| Russian Federation | Khanty-Mansi autonomous area  | 2011-2016               | 6  | 2011-2016               | 6  |
| Russian Federation | Yamalo-Nenets autonomous area | 2011-2016               | 6  | 2011-2016               | 6  |
| Russian Federation | Republic of Tuva              | 2007-2016               | 10 | 2007-2016               | 10 |
| Russian Federation | Sakhalin oblast               | 2007-2016               | 10 | 2007-2016               | 10 |
| Russian Federation | Magadan oblast                | 2007-2015               | 9  | 2007-2016               | 9  |
| Russian Federation | Amur oblast                   | 2007-2016               | 10 | 2007-2016               | 10 |
| Russian Federation | Khabarovsk kray               | 2007-2016               | 10 | 2007-2016               | 10 |
| Russian Federation | Udmurt Republic               | 2007-2016               | 10 | 2007-2016               | 10 |

|                    |                                                       |           |    |           |    |
|--------------------|-------------------------------------------------------|-----------|----|-----------|----|
| Russian Federation | Primorsky kray                                        | 2007-2016 | 10 | 2007-2016 | 10 |
| Russian Federation | Kamchatka kray                                        | 2007-2016 | 10 | 2007-2016 | 10 |
| Russian Federation | Republic of Sakha (Yakutia)                           | 2007-2016 | 10 | 2007-2016 | 10 |
| Russian Federation | Tomsk oblast                                          | 2007-2016 | 10 | 2007-2016 | 10 |
| Russian Federation | Omsk oblast                                           | 2007-2016 | 10 | 2007-2016 | 10 |
| Russian Federation | Republic of Buryatia                                  | 2007-2016 | 10 | 2007-2016 | 10 |
| Russian Federation | Republic of Altai                                     | 2007-2015 | 9  | 2007-2016 | 9  |
| Russian Federation | Chelyabinsk oblast                                    | 2007-2016 | 10 | 2007-2016 | 10 |
| Russian Federation | Tyumen oblast without autonomous areas                | 2011-2015 | 5  | 2011-2015 | 5  |
| Russian Federation | Jewish autonomous oblast                              | 2007-2016 | 10 | 2007-2016 | 10 |
| Russian Federation | Republic of Tatarstan                                 | 2007-2016 | 10 | 2007-2016 | 10 |
| Russian Federation | Altai kray                                            | 2007-2016 | 10 | 2007-2016 | 10 |
| Russian Federation | Republic of Mariy El                                  | 2007-2016 | 10 | 2007-2016 | 10 |
| Russian Federation | Tambov oblast                                         | 2007-2016 | 10 | 2007-2016 | 10 |
| Russian Federation | Astrakhan oblast                                      | 2007-2016 | 10 | 2007-2016 | 10 |
| Russian Federation | Krasnodar kray                                        | 2007-2016 | 10 | 2007-2016 | 10 |
| Russian Federation | Tver oblast                                           | 2007-2016 | 10 | 2007-2016 | 10 |
| Russian Federation | Tula oblast                                           | 2007-2016 | 10 | 2007-2016 | 10 |
| Russian Federation | Yaroslavl oblast                                      | 2007-2016 | 10 | 2007-2016 | 10 |
| Russian Federation | Moscow City                                           | 2007-2016 | 10 | 2007-2016 | 10 |
| Russian Federation | Republic of Karelia                                   | 2007-2016 | 10 | 2007-2016 | 10 |
| Russian Federation | Komi Republic                                         | 2007-2016 | 10 | 2007-2016 | 10 |
| Russian Federation | Smolensk oblast                                       | 2007-2016 | 10 | 2007-2016 | 10 |
| Russian Federation | Arkhangelsk oblast without Nenets autonomous district | 2007-2015 | 9  | 2007-2015 | 9  |
| Russian Federation | Republic of Kalmykia                                  | 2007-2015 | 9  | 2007-2016 | 9  |
| Russian Federation | Republic of Adygeya                                   | 2007-2016 | 10 | 2007-2016 | 10 |
| Russian Federation | Sankt-Petersburg                                      | 2007-2016 | 10 | 2007-2016 | 10 |
| Russian Federation | Pskov oblast                                          | 2007-2016 | 10 | 2007-2016 | 10 |
| Russian Federation | Novgorod oblast                                       | 2007-2016 | 10 | 2007-2016 | 10 |
| Russian Federation | Murmansk oblast                                       | 2007-2016 | 10 | 2007-2016 | 10 |
| Russian Federation | Leningrad oblast                                      | 2007-2016 | 10 | 2007-2016 | 10 |
| Russian Federation | Kaliningrad oblast                                    | 2007-2016 | 10 | 2007-2016 | 10 |
| Russian Federation | Republic of Khakasia                                  | 2007-2016 | 10 | 2007-2016 | 10 |
| Russian Federation | Vologda oblast                                        | 2007-2016 | 10 | 2007-2016 | 10 |
| Russian Federation | Republic of Mordovia                                  | 2007-2016 | 10 | 2007-2016 | 10 |
| Russian Federation | Ryazan oblast                                         | 2007-2016 | 10 | 2007-2016 | 10 |
| Russian Federation | Moscow oblast                                         | 2007-2016 | 10 | 2007-2016 | 10 |

|                    |                                  |                         |    |                         |    |
|--------------------|----------------------------------|-------------------------|----|-------------------------|----|
| Russian Federation | Republic of Bashkortostan        | 2007-2016               | 10 | 2007-2016               | 10 |
| Russian Federation | Stavropol kray                   | 2007-2016               | 10 | 2007-2016               | 10 |
| Russian Federation | Chechen Republic                 | 2007-2016               | 10 | 2007-2016               | 10 |
| Russian Federation | Republic of North Ossetia-Alania | 2007-2016               | 10 | 2007-2016               | 10 |
| Russian Federation | Karachaev-Chercassian Republic   | 2007-2016               | 10 | 2007-2016               | 10 |
| Russian Federation | Kabardian-Balkar Republic        | 2007-2016               | 10 | 2007-2016               | 10 |
| Russian Federation | Republic of Ingushetia           | 2007-2016               | 10 | 2007-2016               | 10 |
| Russian Federation | Republic of Dagestan             | 2007-2016               | 10 | 2007-2016               | 10 |
| Russian Federation | Rostov oblast                    | 2007-2016               | 10 | 2007-2016               | 10 |
| Russian Federation | Oryol oblast                     | 2007-2016               | 10 | 2007-2016               | 10 |
| Russian Federation | Volgograd oblast                 | 2007-2016               | 10 | 2007-2016               | 10 |
| Russian Federation | Belgorod oblast                  | 2007-2016               | 10 | 2007-2016               | 10 |
| Russian Federation | Bryansk oblast                   | 2007-2016               | 10 | 2007-2016               | 10 |
| Russian Federation | Vladimir oblast                  | 2007-2016               | 10 | 2007-2016               | 10 |
| Russian Federation | Voronezh oblast                  | 2007-2016               | 10 | 2007-2016               | 10 |
| Russian Federation | Ivanovo oblast                   | 2007-2016               | 10 | 2007-2016               | 10 |
| Russian Federation | Kaluga oblast                    | 2007-2016               | 10 | 2007-2016               | 10 |
| Russian Federation | Kostroma oblast                  | 2007-2016               | 10 | 2007-2016               | 10 |
| Russian Federation | Kursk oblast                     | 2007-2016               | 10 | 2007-2016               | 10 |
| Russian Federation | Lipetzk oblast                   | 2007-2016               | 10 | 2007-2016               | 10 |
| Russian Federation | St Petersburg                    | 1983-1987,<br>1994-2002 | 14 | 1983-1987,<br>1994-2002 | 0  |
| Samoa              | National Registry                | 1980-1988               | 9  | 1980-1988               | 0  |
| Saudi Arabia       | Riyadh                           | 1994-2012               | 19 | 1994-2012               | 0  |
| Saudi Arabia       | National Registry                | 1994-1996,<br>2006-2012 | 10 | 1994-1996,<br>2006-2012 | 7  |
| Senegal            | Dakar                            | 1969-1974               | 6  | 1969-1974               | 0  |
| Serbia             | Central Serbia                   | 2003-2007               | 5  | 2003-2007               | 5  |
| Serbia             | Vojvodina                        | 1988-1997               | 10 | 1988-1997               | 0  |
| Serbia             | National Registry                | 1999-2002               | 4  | 1999-2002               | 0  |
| Seychelles         | National Registry                | 2009-2012               | 4  | 2009-2012               | 0  |
| Singapore          | National Registry                | 1950-1961,<br>1968-2015 | 60 | 1950-1961,<br>1968-2015 | 0  |
| Slovakia           | National Registry                | 1968-2010               | 43 | 1968-2010               | 30 |
| Slovenia           | National Registry                | 1956-2014               | 59 | 1956-2014               | 12 |
| South Africa       | Johannesburg, Bantu              | 1953-1955               | 3  | 1953-1955               | 0  |
| South Africa       | PROMEC                           | 1998-2007               | 10 | 1998-2007               | 0  |
| South Africa       | Eastern Cape                     | 2008-2012               | 5  | 2008-2012               | 0  |
| South Africa       | South Africa Paediatric          | 1998-2012               | 15 | 1998-2012               | 0  |

|              |                                                                                                                                                                      |                                                     |    |                                                     |    |
|--------------|----------------------------------------------------------------------------------------------------------------------------------------------------------------------|-----------------------------------------------------|----|-----------------------------------------------------|----|
| South Africa | National Registry                                                                                                                                                    | 2003-2005,<br>2008-2012                             | 8  | 2003-2005,<br>2008-2012                             | 0  |
| Spain        | Cuenca                                                                                                                                                               | 1993-2012                                           | 20 | 1993-2012                                           | 5  |
| Spain        | Ciudad Real                                                                                                                                                          | 2004-2011                                           | 8  | 2004-2011                                           | 0  |
| Spain        | Canary Islands                                                                                                                                                       | 1993-1995,<br>1997-2001,<br>2003-2006,<br>2008-2011 | 16 | 1993-1995,<br>1997-2001,<br>2003-2006,<br>2008-2011 | 0  |
| Spain        | Basque Country                                                                                                                                                       | 1986-2012                                           | 27 | 1986-2012                                           | 4  |
| Spain        | Girona                                                                                                                                                               | 1980-2012                                           | 33 | 1980-2012                                           | 23 |
| Spain        | La Rioja                                                                                                                                                             | 1993-2012                                           | 20 | 1993-2012                                           | 13 |
| Spain        | Murcia                                                                                                                                                               | 1983-2010                                           | 28 | 1983-2010                                           | 25 |
| Spain        | Navarra                                                                                                                                                              | 1973-2010                                           | 38 | 1973-2010                                           | 31 |
| Spain        | Tarragona                                                                                                                                                            | 1980-2012                                           | 33 | 1980-2012                                           | 24 |
| Spain        | Zaragoza                                                                                                                                                             | 1968-2000                                           | 33 | 1968-2000                                           | 0  |
| Spain        | 11 Registries Combined<br>(Albacete, Asturias,<br>Balearic Islands, Basque<br>Country, Canary Islands,<br>Cuenca, Girona, Granada,<br>Murcia, Navarra,<br>Tarragona) | 1990-2013                                           | 24 | 1990-2013                                           | 0  |
| Spain        | Albacete                                                                                                                                                             | 1991-2010                                           | 20 | 1991-2010                                           | 6  |
| Spain        | Granada                                                                                                                                                              | 1985-2012                                           | 28 | 1985-2012                                           | 23 |
| Spain        | Mallorca                                                                                                                                                             | 1988-1996,<br>2003-2011                             | 18 | 1988-1996,<br>2003-2011                             | 0  |
| Spain        | Balears                                                                                                                                                              | 1988-2005                                           | 18 | 1988-2005                                           | 0  |
| Spain        | Asturias                                                                                                                                                             | 1982-2000,<br>2003-2010                             | 21 | 1988-2000,<br>2003-2010                             | 5  |
| Sri Lanka    | National Registry                                                                                                                                                    | 2001-2005                                           | 5  | 2001-2005                                           | 0  |
| Sweden       | National Registry                                                                                                                                                    | 1958-2014                                           | 57 | 1958-2014                                           | 35 |
| Sweden       | Sweden except<br>Stockholm                                                                                                                                           | 2002-2016                                           | 15 | 2002-2016                                           | 0  |
| Sweden       | Stockholm                                                                                                                                                            | 2002-2016                                           | 15 | 2002-2016                                           | 0  |
| Switzerland  | Zurich                                                                                                                                                               | 1980-2012                                           | 33 | 1980-2012                                           | 0  |
| Switzerland  | Fribourg                                                                                                                                                             | 2008-2012                                           | 5  | 2008-2012                                           | 0  |
| Switzerland  | 7 Registries Combined<br>(Fribourg, Geneva,<br>Neuchatel, Ticino, Valais,<br>Vaud, Zurich)                                                                           | 1990-2013                                           | 24 | 1990-2013                                           | 0  |
| Switzerland  | Switzerland Paediatric                                                                                                                                               | 1990-2013                                           | 24 | 1990-2013                                           | 0  |
| Switzerland  | National Registry                                                                                                                                                    | 1989-2013                                           | 25 | 1985-2017                                           | 2  |
| Switzerland  | Graubunden and Glarus                                                                                                                                                | 1989-2012                                           | 24 | 1980-2012                                           | 20 |
| Switzerland  | Graubunden                                                                                                                                                           | 1989-1997                                           | 9  | 1989-1997                                           | 0  |

|                            |                                                                                                                  |                                       |    |                         |    |
|----------------------------|------------------------------------------------------------------------------------------------------------------|---------------------------------------|----|-------------------------|----|
| Switzerland                | Neuchatel                                                                                                        | 1974-1976,<br>1978-1996,<br>1998-2012 | 37 | 1974-1976,<br>1978-2012 | 5  |
| Switzerland                | St Gallen - Appenzell                                                                                            | 1980-2012                             | 33 | 1980-2012               | 29 |
| Switzerland                | Ticino                                                                                                           | 1996-2012                             | 17 | 1996-2012               | 0  |
| Switzerland                | Valais                                                                                                           | 1989-2012                             | 24 | 1989-2012               | 0  |
| Switzerland                | Vaud                                                                                                             | 1975-1996,<br>1998-2012               | 37 | 1975-2012               | 5  |
| Switzerland                | Basel                                                                                                            | 1981-1997,<br>2003-2007               | 22 | 1981-1997,<br>2003-2007 | 0  |
| Switzerland                | Geneva                                                                                                           | 1970-2012                             | 43 | 1970-2012               | 29 |
| Taiwan (Province of China) | National Registry                                                                                                | 1980-2009                             | 30 | 1980-2009               | 28 |
| Thailand                   | Udon Thani                                                                                                       | 2001-2003                             | 3  | 2001-2003               | 0  |
| Thailand                   | Songkhla                                                                                                         | 1993-1996,<br>1998-2012               | 19 | 1993-1996,<br>1998-2012 | 0  |
| Thailand                   | Lopburi Province                                                                                                 | 2009-2012                             | 4  | 2009-2012               | 0  |
| Thailand                   | Bangkok                                                                                                          | 1995-1997,<br>2001-2012               | 15 | 1995-1997,<br>2001-2012 | 0  |
| Thailand                   | Chiang Mai                                                                                                       | 1983-2012                             | 30 | 1983-2012               | 0  |
| Thailand                   | Chonburi                                                                                                         | 2001-2011                             | 11 | 2001-2011               | 0  |
| Thailand                   | Surat Thani                                                                                                      | 2001-2003                             | 3  | 2001-2003               | 0  |
| Thailand                   | Khon Kaen                                                                                                        | 1985-2012                             | 22 | 1988-1997,<br>2001-2012 | 0  |
| Thailand                   | Lop Buri                                                                                                         | 2001-2003                             | 3  | 2001-2003               | 0  |
| Thailand                   | Nakhon Phanom                                                                                                    | 2001-2003                             | 3  | 2001-2003               | 0  |
| Thailand                   | Prachuap Khiri                                                                                                   | 2001-2003                             | 3  | 2001-2003               | 0  |
| Thailand                   | Rayong                                                                                                           | 2001-2003                             | 3  | 2001-2003               | 0  |
| Thailand                   | Lampang                                                                                                          | 1993-2013                             | 21 | 1993-2013               | 0  |
| Thailand                   | Ubon Ratchathani                                                                                                 | 2001-2003                             | 3  | 2001-2003               | 0  |
| Trinidad and Tobago        | National Registry                                                                                                | 1995-2006                             | 12 | 1995-2006               | 12 |
| Tunisia                    | North Tunisia                                                                                                    | 1994-2006                             | 13 | 1994-2006               | 0  |
| Tunisia                    | Central Tunisia                                                                                                  | 1993-2007                             | 15 | 1993-2007               | 0  |
| Tunisia                    | Centre Sousse                                                                                                    | 1998-2002                             | 5  | 1998-2002               | 0  |
| Turkey                     | Nine Provinces Combined<br>(Ankara, Antalya, Bursa,<br>Edirne, Erzurum,<br>Eskisehir, Izmir, Samsun,<br>Trabzon) | 2009-2014                             | 6  | 2009-2014               | 0  |
| Turkey                     | Izmir                                                                                                            | 1993-1996,<br>1998-2012               | 15 | 1998-2012               | 0  |
| Turkey                     | Eskisehir                                                                                                        | 2002-2005,<br>2008-2012               | 9  | 2002-2005,<br>2008-2012 | 0  |
| Turkey                     | Erzurum                                                                                                          | 2002-2005,<br>2010-2012               | 7  | 2002-2005,<br>2010-2012 | 0  |

|                |                                                                                                  |                         |    |                         |    |
|----------------|--------------------------------------------------------------------------------------------------|-------------------------|----|-------------------------|----|
| Turkey         | Edirne                                                                                           | 2002-2012               | 11 | 2002-2012               | 0  |
| Turkey         | Antalya                                                                                          | 1998-2012               | 15 | 1998-2012               | 0  |
| Turkey         | Ankara                                                                                           | 2002-2005               | 4  | 2002-2005               | 0  |
| Turkey         | Bursa                                                                                            | 2008-2012               | 5  | 2008-2012               | 0  |
| Turkey         | Trabzon                                                                                          | 2002-2003,<br>2005-2012 | 10 | 2002-2003,<br>2005-2012 | 0  |
| Turkey         | Samsun                                                                                           | 2002-2005,<br>2008-2012 | 9  | 2002-2005,<br>2008-2012 | 0  |
| Turkey         | 8 Registries Combined<br>(Ankara, Antalya, Bursa,<br>Edirne, Erzurum, Izmir,<br>Samsun, Trabzon) | 1992-2012               | 21 | 1992-2012               | 0  |
| Uganda         | Kampala                                                                                          | 1954-1960,<br>1990-2013 | 31 | 1954-1960,<br>1990-2013 | 0  |
| Ukraine        | Sevastopol                                                                                       | 2014-2015               | 2  | 2014-2016               | 1  |
| Ukraine        | National Registry                                                                                | 2002-2012               | 11 | 2002-2012               | 0  |
| Ukraine        | Republic of Crimea                                                                               | 2014-2016               | 3  | 2014-2016               | 2  |
| Ukraine        | National Registry<br>(without Crimea &<br>Sevastopol)                                            | 2000-2012               | 13 | 2000-2012               | 2  |
| United Kingdom | Bury                                                                                             | 2015-2017               | 3  | 2015-2017               | 0  |
| United Kingdom | Barnsley                                                                                         | 2015-2017               | 3  | 2015-2017               | 0  |
| United Kingdom | Yorkshire                                                                                        | 1983-2002               | 20 | 1983-2002               | 0  |
| United Kingdom | Northern England and<br>Yorkshire                                                                | 1998-2002,<br>2008-2012 | 10 | 1998-2002,<br>2008-2012 | 0  |
| United Kingdom | York                                                                                             | 2015-2017               | 3  | 2015-2017               | 0  |
| United Kingdom | Wakefield                                                                                        | 2015-2017               | 3  | 2015-2017               | 0  |
| United Kingdom | Sheffield                                                                                        | 2015-2017               | 3  | 2015-2017               | 0  |
| United Kingdom | Rotherham                                                                                        | 2015-2017               | 3  | 2015-2017               | 0  |
| United Kingdom | North Lincolnshire                                                                               | 2015-2017               | 3  | 2015-2017               | 0  |
| United Kingdom | North East Lincolnshire                                                                          | 2015-2017               | 3  | 2015-2017               | 0  |
| United Kingdom | Leeds                                                                                            | 2015-2017               | 3  | 2015-2017               | 0  |
| United Kingdom | Kirklees                                                                                         | 2015-2017               | 3  | 2015-2017               | 0  |
| United Kingdom | Yorkshire and the<br>Humber                                                                      | 1990-2014               | 25 | 1981-2014               | 17 |
| United Kingdom | Cumbria                                                                                          | 2015-2017               | 3  | 2015-2017               | 0  |
| United Kingdom | Cheshire West and<br>Chester                                                                     | 2015-2017               | 3  | 2015-2017               | 0  |
| United Kingdom | Cheshire East                                                                                    | 2015-2017               | 3  | 2015-2017               | 0  |
| United Kingdom | Bradford                                                                                         | 2015-2017               | 3  | 2015-2017               | 0  |
| United Kingdom | North Yorkshire                                                                                  | 2015-2017               | 3  | 2015-2017               | 0  |
| United Kingdom | Calderdale                                                                                       | 2015-2017               | 3  | 2015-2017               | 0  |
| United Kingdom | Croydon                                                                                          | 2015-2017               | 3  | 2015-2017               | 0  |
| United Kingdom | East Riding of Yorkshire                                                                         | 2015-2017               | 3  | 2015-2017               | 0  |

|                |                             |                                       |    |                                                                |    |
|----------------|-----------------------------|---------------------------------------|----|----------------------------------------------------------------|----|
| United Kingdom | Bolton                      | 2015-2017                             | 3  | 2015-2017                                                      | 0  |
| United Kingdom | Camden                      | 2015-2017                             | 3  | 2015-2017                                                      | 0  |
| United Kingdom | Walsall                     | 2015-2017                             | 3  | 2015-2017                                                      | 0  |
| United Kingdom | Telford and Wrekin          | 2015-2017                             | 3  | 2015-2017                                                      | 0  |
| United Kingdom | Stoke-on-Trent              | 2015-2017                             | 3  | 2015-2017                                                      | 0  |
| United Kingdom | West Midlands               | 1960-1966,<br>1968-1976,<br>1979-2014 | 52 | 1960-1966,<br>1968-1976,<br>1979, 1981-<br>2009, 2011-<br>2014 | 25 |
| United Kingdom | Nottinghamshire             | 2015-2017                             | 3  | 2015-2017                                                      | 0  |
| United Kingdom | Nottingham                  | 2015-2017                             | 3  | 2015-2017                                                      | 0  |
| United Kingdom | Northamptonshire            | 2015-2017                             | 3  | 2015-2017                                                      | 0  |
| United Kingdom | Lincolnshire                | 2015-2017                             | 3  | 2015-2017                                                      | 0  |
| United Kingdom | Leicestershire              | 2015-2017                             | 3  | 2015-2017                                                      | 0  |
| United Kingdom | Leicester                   | 2015-2017                             | 3  | 2015-2017                                                      | 0  |
| United Kingdom | Derbyshire                  | 2015-2017                             | 3  | 2015-2017                                                      | 0  |
| United Kingdom | Derby                       | 2015-2017                             | 3  | 2015-2017                                                      | 0  |
| United Kingdom | Rutland                     | 2015-2017                             | 3  | 2015-2017                                                      | 0  |
| United Kingdom | East Midlands               | 1990-2014                             | 25 | 1981-2009,<br>2011-2014                                        | 16 |
| United Kingdom | Kingston upon Hull, City of | 2015-2017                             | 3  | 2015-2017                                                      | 0  |
| United Kingdom | Doncaster                   | 2015-2017                             | 3  | 2015-2017                                                      | 0  |
| United Kingdom | Blackpool                   | 2015-2017                             | 3  | 2015-2017                                                      | 0  |
| United Kingdom | National Registry           | 2008-2012                             | 5  | 2008-2012                                                      | 0  |
| United Kingdom | Wirral                      | 2015-2017                             | 3  | 2015-2017                                                      | 0  |
| United Kingdom | Darlington                  | 2015-2017                             | 3  | 2015-2017                                                      | 0  |
| United Kingdom | County Durham               | 2015-2017                             | 3  | 2015-2017                                                      | 0  |
| United Kingdom | Sunderland                  | 2015-2017                             | 3  | 2015-2017                                                      | 0  |
| United Kingdom | Stockton-on-Tees            | 2015-2017                             | 3  | 2015-2017                                                      | 0  |
| United Kingdom | South Tyneside              | 2015-2017                             | 3  | 2015-2017                                                      | 0  |
| United Kingdom | Redcar and Cleveland        | 2015-2017                             | 3  | 2015-2017                                                      | 0  |
| United Kingdom | North East England          | 1990-2014                             | 25 | 1981-2009,<br>2011-2014                                        | 16 |
| United Kingdom | West Scotland               | 1975-1992                             | 18 | 1975-1992                                                      | 0  |
| United Kingdom | South East Scotland         | 1973-1987                             | 15 | 1973-1987                                                      | 0  |
| United Kingdom | North Scotland              | 1973-1987                             | 15 | 1973-1987                                                      | 0  |
| United Kingdom | North East Scotland         | 1973-1987                             | 15 | 1973-1987                                                      | 0  |
| United Kingdom | East Scotland               | 1973-1987                             | 15 | 1973-1987                                                      | 0  |
| United Kingdom | Aryshire                    | 1970-1972                             | 3  | 1970-1972                                                      | 0  |
| United Kingdom | Scotland                    | 1963-1966,<br>1975-2015               | 45 | 1963-1966,<br>1974-2015                                        | 25 |

|                |                         |                                       |    |                                                     |    |
|----------------|-------------------------|---------------------------------------|----|-----------------------------------------------------|----|
| United Kingdom | Northern Ireland        | 1993-2012                             | 20 |                                                     | 0  |
| United Kingdom | England and Wales       | 1979-1990                             | 12 | 1979-1990                                           | 0  |
| United Kingdom | Wolverhampton           | 2015-2017                             | 3  | 2015-2017                                           | 0  |
| United Kingdom | Gateshead               | 2015-2017                             | 3  | 2015-2017                                           | 0  |
| United Kingdom | Hartlepool              | 2015-2017                             | 3  | 2015-2017                                           | 0  |
| United Kingdom | Middlesbrough           | 2015-2017                             | 3  | 2015-2017                                           | 0  |
| United Kingdom | Newcastle upon Tyne     | 2015-2017                             | 3  | 2015-2017                                           | 0  |
| United Kingdom | Wigan                   | 2015-2017                             | 3  | 2015-2017                                           | 0  |
| United Kingdom | Warrington              | 2015-2017                             | 3  | 2015-2017                                           | 0  |
| United Kingdom | Trafford                | 2015-2017                             | 3  | 2015-2017                                           | 0  |
| United Kingdom | Tameside                | 2015-2017                             | 3  | 2015-2017                                           | 0  |
| United Kingdom | Stockport               | 2015-2017                             | 3  | 2015-2017                                           | 0  |
| United Kingdom | Merseyside and Cheshire | 1959-1966,<br>1968-1972,<br>1975-2002 | 33 | 1959-1966,<br>1968-1972,<br>1975-1979,<br>1988-2002 | 0  |
| United Kingdom | St. Helens              | 2015-2017                             | 3  | 2015-2017                                           | 0  |
| United Kingdom | Sefton                  | 2015-2017                             | 3  | 2015-2017                                           | 0  |
| United Kingdom | Blackburn with Darwen   | 2015-2017                             | 3  | 2015-2017                                           | 0  |
| United Kingdom | Salford                 | 2015-2017                             | 3  | 2015-2017                                           | 0  |
| United Kingdom | Oldham                  | 2015-2017                             | 3  | 2015-2017                                           | 0  |
| United Kingdom | Manchester              | 2015-2017                             | 3  | 2015-2017                                           | 0  |
| United Kingdom | Liverpool               | 2015-2017                             | 3  | 2015-2017                                           | 0  |
| United Kingdom | Lancashire              | 2015-2017                             | 3  | 2015-2017                                           | 0  |
| United Kingdom | Knowsley                | 2015-2017                             | 3  | 2015-2017                                           | 0  |
| United Kingdom | Halton                  | 2015-2017                             | 3  | 2015-2017                                           | 0  |
| United Kingdom | North West England      | 1973-1977,<br>1979-2014               | 41 | 1973-1977,<br>1979, 1988-<br>2009, 2011-<br>2014    | 16 |
| United Kingdom | Northumberland          | 2015-2017                             | 3  | 2015-2017                                           | 0  |
| United Kingdom | Rochdale                | 2015-2017                             | 3  | 2015-2017                                           | 0  |
| United Kingdom | Worcestershire          | 2015-2017                             | 3  | 2015-2017                                           | 0  |
| United Kingdom | Warwickshire            | 2015-2017                             | 3  | 2015-2017                                           | 0  |
| United Kingdom | Coventry                | 2015-2017                             | 3  | 2015-2017                                           | 0  |
| United Kingdom | Southwark               | 2015-2017                             | 3  | 2015-2017                                           | 0  |
| United Kingdom | Barking and Dagenham    | 2015-2017                             | 3  | 2015-2017                                           | 0  |
| United Kingdom | Sutton                  | 2015-2017                             | 3  | 2015-2017                                           | 0  |
| United Kingdom | Tower Hamlets           | 2015-2017                             | 3  | 2015-2017                                           | 0  |
| United Kingdom | Waltham Forest          | 2015-2017                             | 3  | 2015-2017                                           | 0  |
| United Kingdom | Wandsworth              | 2015-2017                             | 3  | 2015-2017                                           | 0  |
| United Kingdom | Richmond upon Thames    | 2015-2017                             | 3  | 2015-2017                                           | 0  |
| United Kingdom | Westminster             | 2015-2017                             | 3  | 2015-2017                                           | 0  |



|                |                          |                                                     |    |                                                     |   |
|----------------|--------------------------|-----------------------------------------------------|----|-----------------------------------------------------|---|
| United Kingdom | Bexley                   | 2015-2017                                           | 3  | 2015-2017                                           | 0 |
| United Kingdom | Brent                    | 2015-2017                                           | 3  | 2015-2017                                           | 0 |
| United Kingdom | Bromley                  | 2015-2017                                           | 3  | 2015-2017                                           | 0 |
| United Kingdom | England                  | 1971-2013,<br>2015-2016                             | 26 | 1990-2013,<br>2015-2016                             | 0 |
| United Kingdom | Wales                    | 2003-2012                                           | 10 | 1981-2012                                           | 2 |
| United Kingdom | Dorset                   | 2015-2017                                           | 3  | 2015-2017                                           | 0 |
| United Kingdom | Barnet                   | 2015-2017                                           | 3  | 2015-2017                                           | 0 |
| United Kingdom | Redbridge                | 2015-2017                                           | 3  | 2015-2017                                           | 0 |
| United Kingdom | Newham                   | 2015-2017                                           | 3  | 2015-2017                                           | 0 |
| United Kingdom | Merton                   | 2015-2017                                           | 3  | 2015-2017                                           | 0 |
| United Kingdom | Enfield                  | 2015-2017                                           | 3  | 2015-2017                                           | 0 |
| United Kingdom | Greenwich                | 2015-2017                                           | 3  | 2015-2017                                           | 0 |
| United Kingdom | Hackney & City of London | 2015-2017                                           | 3  | 2015-2017                                           | 0 |
| United Kingdom | Hammersmith and Fulham   | 2015-2017                                           | 3  | 2015-2017                                           | 0 |
| United Kingdom | Haringey                 | 2015-2017                                           | 3  | 2015-2017                                           | 0 |
| United Kingdom | Harrow                   | 2015-2017                                           | 3  | 2015-2017                                           | 0 |
| United Kingdom | Havering                 | 2015-2017                                           | 3  | 2015-2017                                           | 0 |
| United Kingdom | Hillingdon               | 2015-2017                                           | 3  | 2015-2017                                           | 0 |
| United Kingdom | Hounslow                 | 2015-2017                                           | 3  | 2015-2017                                           | 0 |
| United Kingdom | Thames                   | 1998-2007                                           | 5  | 1991-1999,<br>2001-2007                             | 0 |
| United Kingdom | Islington                | 2015-2017                                           | 3  | 2015-2017                                           | 0 |
| United Kingdom | Kensington and Chelsea   | 2015-2017                                           | 3  | 2015-2017                                           | 0 |
| United Kingdom | Kingston upon Thames     | 2015-2017                                           | 3  | 2015-2017                                           | 0 |
| United Kingdom | Lambeth                  | 2015-2017                                           | 3  | 2015-2017                                           | 0 |
| United Kingdom | Lewisham                 | 2015-2017                                           | 3  | 2015-2017                                           | 0 |
| United Kingdom | Devon                    | 2015-2017                                           | 3  | 2015-2017                                           | 0 |
| United Kingdom | Cornwall                 | 2015-2017                                           | 3  | 2015-2017                                           | 0 |
| United Kingdom | Bristol, City of         | 2015-2017                                           | 3  | 2015-2017                                           | 0 |
| United Kingdom | Bournemouth              | 2015-2017                                           | 3  | 2015-2017                                           | 0 |
| United Kingdom | Wokingham                | 2015-2017                                           | 3  | 2015-2017                                           | 0 |
| United Kingdom | Windsor and Maidenhead   | 2015-2017                                           | 3  | 2015-2017                                           | 0 |
| United Kingdom | West Sussex              | 2015-2017                                           | 3  | 2015-2017                                           | 0 |
| United Kingdom | Oxford                   | 1963-1966,<br>1968-1972,<br>1974-1977,<br>1979-2007 | 42 | 1963-1966,<br>1968-1972,<br>1974-1977,<br>1979-2007 | 0 |
| United Kingdom | West Berkshire           | 2015-2017                                           | 3  | 2015-2017                                           | 0 |
| United Kingdom | Surrey                   | 2015-2017                                           | 3  | 2015-2017                                           | 0 |

|                |                              |                                                                   |    |                                                                   |    |
|----------------|------------------------------|-------------------------------------------------------------------|----|-------------------------------------------------------------------|----|
| United Kingdom | Southampton                  | 2015-2017                                                         | 3  | 2015-2017                                                         | 0  |
| United Kingdom | Slough                       | 2015-2017                                                         | 3  | 2015-2017                                                         | 0  |
| United Kingdom | Reading                      | 2015-2017                                                         | 3  | 2015-2017                                                         | 0  |
| United Kingdom | Portsmouth                   | 2015-2017                                                         | 3  | 2015-2017                                                         | 0  |
| United Kingdom | Oxfordshire                  | 2015-2017                                                         | 3  | 2015-2017                                                         | 0  |
| United Kingdom | Milton Keynes                | 2015-2017                                                         | 3  | 2015-2017                                                         | 0  |
| United Kingdom | Medway                       | 2015-2017                                                         | 3  | 2015-2017                                                         | 0  |
| United Kingdom | Kent                         | 2015-2017                                                         | 3  | 2015-2017                                                         | 0  |
| United Kingdom | South East England           | 1990-2014                                                         | 25 | 1981-2009,<br>2011-2014                                           | 16 |
| United Kingdom | South Thames                 | 1960-1997                                                         | 38 | 1960-1997                                                         | 0  |
| United Kingdom | Ealing                       | 2015-2017                                                         | 3  | 2015-2017                                                         | 0  |
| United Kingdom | Bracknell Forest             | 2015-2017                                                         | 3  | 2015-2017                                                         | 0  |
| United Kingdom | Buckinghamshire              | 2015-2017                                                         | 3  | 2015-2017                                                         | 0  |
| United Kingdom | Bath and North East Somerset | 2015-2017                                                         | 3  | 2015-2017                                                         | 0  |
| United Kingdom | Trent                        | 1963-1970,<br>1974-1976,<br>1979-1987,<br>1993-2002,<br>2005-2007 | 24 | 1963-1970,<br>1974-1976,<br>1991-2007                             | 0  |
| United Kingdom | Wiltshire                    | 2015-2017                                                         | 3  | 2015-2017                                                         | 0  |
| United Kingdom | Torbay                       | 2015-2017                                                         | 3  | 2015-2017                                                         | 0  |
| United Kingdom | Swindon                      | 2015-2017                                                         | 3  | 2015-2017                                                         | 0  |
| United Kingdom | South Gloucestershire        | 2015-2017                                                         | 3  | 2015-2017                                                         | 0  |
| United Kingdom | Somerset                     | 2015-2017                                                         | 3  | 2015-2017                                                         | 0  |
| United Kingdom | Poole                        | 2015-2017                                                         | 3  | 2015-2017                                                         | 0  |
| United Kingdom | Plymouth                     | 2015-2017                                                         | 3  | 2015-2017                                                         | 0  |
| United Kingdom | North Somerset               | 2015-2017                                                         | 3  | 2015-2017                                                         | 0  |
| United Kingdom | Gloucestershire              | 2015-2017                                                         | 3  | 2015-2017                                                         | 0  |
| United Kingdom | South West England           | 1960-1970,<br>1979-2014                                           | 45 | 1960-1970,<br>1981-1984,<br>1986-1989,<br>1991-2009,<br>2011-2014 | 15 |
| United Kingdom | Isle of Wight                | 2015-2017                                                         | 3  | 2015-2017                                                         | 0  |
| United Kingdom | Hampshire                    | 2015-2017                                                         | 3  | 2015-2017                                                         | 0  |
| United Kingdom | East Sussex                  | 2015-2017                                                         | 3  | 2015-2017                                                         | 0  |
| United Kingdom | Brighton and Hove            | 2015-2017                                                         | 3  | 2015-2017                                                         | 0  |
| United Kingdom | Birmingham                   | 2015-2017                                                         | 3  | 2015-2017                                                         | 0  |
| United Kingdom | North Tyneside               | 2015-2017                                                         | 3  | 2015-2017                                                         | 0  |
| United Kingdom | Central Bedfordshire         | 2015-2017                                                         | 3  | 2015-2017                                                         | 0  |

|                          |                          |                         |    |                                       |    |
|--------------------------|--------------------------|-------------------------|----|---------------------------------------|----|
| United Kingdom           | Greater London           | 1990-2014               | 25 | 1981-1999,<br>2001-2009,<br>2011-2014 | 16 |
| United Kingdom           | Norfolk                  | 2015-2017               | 3  | 2015-2017                             | 0  |
| United Kingdom           | Luton                    | 2015-2017               | 3  | 2015-2017                             | 0  |
| United Kingdom           | Hertfordshire            | 2015-2017               | 3  | 2015-2017                             | 0  |
| United Kingdom           | Essex                    | 2015-2017               | 3  | 2015-2017                             | 0  |
| United Kingdom           | Cambridgeshire           | 2015-2017               | 3  | 2015-2017                             | 0  |
| United Kingdom           | Bedford                  | 2015-2017               | 3  | 2015-2017                             | 0  |
| United Kingdom           | East Anglia              | 1988-1997               | 10 | 1988-1997                             | 0  |
| United Kingdom           | Suffolk                  | 2015-2017               | 3  | 2015-2017                             | 0  |
| United Kingdom           | Thurrock                 | 2015-2017               | 3  | 2015-2017                             | 0  |
| United Kingdom           | Peterborough             | 2015-2017               | 3  | 2015-2017                             | 0  |
| United Kingdom           | East of England          | 1990-2014               | 25 | 1981-2009,<br>2011-2014               | 16 |
| United Kingdom           | Staffordshire            | 2015-2017               | 3  | 2015-2017                             | 0  |
| United Kingdom           | Solihull                 | 2015-2017               | 3  | 2015-2017                             | 0  |
| United Kingdom           | Shropshire               | 2015-2017               | 3  | 2015-2017                             | 0  |
| United Kingdom           | Sandwell                 | 2015-2017               | 3  | 2015-2017                             | 0  |
| United Kingdom           | Herefordshire, County of | 2015-2017               | 3  | 2015-2017                             | 0  |
| United Kingdom           | Dudley                   | 2015-2017               | 3  | 2015-2017                             | 0  |
| United Kingdom           | Southend-on-Sea          | 2015-2017               | 3  | 2015-2017                             | 0  |
| United States of America | Oregon                   | 1998-2012               | 15 | 1998-2012                             | 0  |
| United States of America | Rhode Island             | 1998-2012               | 15 | 1998-2012                             | 0  |
| United States of America | Pennsylvania             | 1998-2012               | 15 | 1998-2012                             | 0  |
| United States of America | Oklahoma                 | 1998-2012               | 15 | 1998-2012                             | 0  |
| United States of America | San Francisco            | 1973-2012               | 40 | 1973-2012                             | 0  |
| United States of America | North Dakota             | 2003-2012               | 10 | 2003-2012                             | 0  |
| United States of America | North Carolina           | 2003-2012               | 10 | 2003-2012                             | 0  |
| United States of America | San Jose Monterey        | 1973-2013               | 41 | 1973-2013                             | 24 |
| United States of America | South Carolina           | 1998-2012               | 15 | 1998-2012                             | 0  |
| United States of America | Ohio                     | 1998-2012               | 15 | 1998-2012                             | 0  |
| United States of America | South Dakota             | 2003-2012               | 10 | 2003-2012                             | 0  |
| United States of America | Wyoming                  | 2003-2012               | 10 | 2003-2012                             | 0  |
| United States of America | Texas                    | 1998-2012               | 15 | 1998-2012                             | 0  |
| United States of America | El Paso                  | 1960-1966,<br>1968-1970 | 10 | 1960-1966,<br>1968-1970               | 0  |
| United States of America | Utah                     | 1973-2013               | 41 | 1973-2013                             | 37 |
| United States of America | Vermont                  | 1998-2012               | 15 | 1998-2012                             | 0  |
| United States of America | Virginia                 | 1998-2012               | 15 | 1998-2012                             | 0  |
| United States of America | Washington               | 1998-2012               | 15 | 1998-2012                             | 0  |
| United States of America | Seattle                  | 1973-2013               | 41 | 1973-2013                             | 36 |
| United States of America | West Virginia            | 1998-2012               | 15 | 1998-2012                             | 0  |

|                          |                                                         |                                       |    |                                       |    |
|--------------------------|---------------------------------------------------------|---------------------------------------|----|---------------------------------------|----|
| United States of America | Wisconsin                                               | 1998-2012                             | 15 | 1998-2012                             | 0  |
| United States of America | New York                                                | 1993-2012                             | 20 | 1993-2012                             | 0  |
| United States of America | Tennessee                                               | 1999-2012                             | 14 | 1999-2012                             | 0  |
| United States of America | New Mexico                                              | 1969-2013                             | 45 | 1969-2013                             | 37 |
| United States of America | New York except New York City                           | 1959-1961                             | 3  | 1959-1961                             | 0  |
| United States of America | New Hampshire                                           | 2003-2012                             | 10 | 2003-2012                             | 0  |
| United States of America | Rural Georgia                                           | 1973-2013                             | 41 | 1973-2013                             | 24 |
| United States of America | Greater Georgia                                         | 1973-2013                             | 41 | 1973-2013                             | 13 |
| United States of America | Atlanta                                                 | 1973-2013                             | 41 | 1973-2013                             | 36 |
| United States of America | Georgia                                                 | 1998-2012                             | 15 | 1998-2012                             | 0  |
| United States of America | Florida                                                 | 1998-2012                             | 15 | 1998-2012                             | 0  |
| United States of America | District of Columbia                                    | 1998-2002                             | 5  | 1998-2002                             | 0  |
| United States of America | Delaware                                                | 1998-2012                             | 15 | 1998-2012                             | 0  |
| United States of America | Connecticut                                             | 1960-1962,<br>1973-2013               | 44 | 1960-1962,<br>1973-2013               | 37 |
| United States of America | NPCR                                                    | 2008-2012                             | 5  | 2008-2012                             | 0  |
| United States of America | New Jersey                                              | 1973-2013                             | 41 | 1973-2013                             | 19 |
| United States of America | National Registry                                       | 1962-1966,<br>1968-1977,<br>1983-2012 | 45 | 1962-1966,<br>1968-1977,<br>1983-2012 | 0  |
| United States of America | Colorado                                                | 1998-2012                             | 15 | 1998-2012                             | 0  |
| United States of America | Arizona                                                 | 1998-2012                             | 15 | 1998-2012                             | 0  |
| United States of America | Arkansas                                                | 2003-2012                             | 10 | 2003-2012                             | 0  |
| United States of America | California                                              | 1998-2012                             | 15 | 1998-2012                             | 0  |
| United States of America | Alameda County                                          | 1983-1987                             | 5  | 1983-1987                             | 0  |
| United States of America | California except SF, SJ-M, & LA                        | 2000-2013                             | 14 | 2000-2013                             | 9  |
| United States of America | Central California                                      | 1988-1992                             | 5  | 1988-1992                             | 0  |
| United States of America | Los Angeles                                             | 1973-2013                             | 41 | 1973-2013                             | 24 |
| United States of America | San Francisco, Oakland, San Mateo, and Surrounding Area | 1973-2013                             | 41 | 1973-2013                             | 36 |
| United States of America | Alabama                                                 | 1998-2012                             | 15 | 1998-2012                             | 0  |
| United States of America | Idaho                                                   | 1998-2012                             | 15 | 1998-2012                             | 0  |
| United States of America | Hawaii                                                  | 1960-1964,<br>1968-2013               | 51 | 1960-1964,<br>1968-2013               | 37 |
| United States of America | Massachusetts                                           | 1998-2012                             | 15 | 1998-2012                             | 0  |
| United States of America | Nevada                                                  | 1959-1966,<br>2008-2012               | 13 | 1959-1966,<br>2008-2012               | 0  |
| United States of America | Nebraska                                                | 1998-2012                             | 15 | 1998-2012                             | 0  |
| United States of America | Montana                                                 | 1998-2012                             | 15 | 1998-2012                             | 0  |
| United States of America | Missouri                                                | 1996-2012                             | 17 | 1996-2012                             | 0  |

|                          |                   |                         |    |                         |    |
|--------------------------|-------------------|-------------------------|----|-------------------------|----|
| United States of America | Mississippi       | 2003-2012               | 10 | 2003-2012               | 0  |
| United States of America | Minnesota         | 1998-2012               | 15 | 1998-2012               | 0  |
| United States of America | Detroit           | 1973-2013               | 41 | 1973-2013               | 37 |
| United States of America | Michigan          | 1998-2012               | 15 | 1998-2012               | 0  |
| United States of America | Maryland          | 1998-2012               | 15 | 1998-2012               | 0  |
| United States of America | Alaska            | 1992-2013               | 22 | 1992-2013               | 17 |
| United States of America | Maine             | 1998-2012               | 15 | 1998-2012               | 0  |
| United States of America | New Orleans       | 1983-2012               | 30 | 1983-2012               | 0  |
| United States of America | Louisiana         | 1973-2013               | 41 | 1973-2013               | 18 |
| United States of America | Kentucky          | 1973-2013               | 41 | 1973-2013               | 19 |
| United States of America | Iowa              | 1973-2013               | 41 | 1973-2013               | 37 |
| United States of America | Indiana           | 1998-2012               | 15 | 1998-2012               | 0  |
| United States of America | Illinois          | 1998-2012               | 15 | 1998-2012               | 0  |
| Uruguay                  | Montevideo        | 1990-1995               | 6  | 1990-1995               | 0  |
| Uruguay                  | National Registry | 2002-2014               | 13 | 2002-2014               | 0  |
| Viet Nam                 | Ho Chi Minh       | 1995-1998,<br>2009-2012 | 8  | 1995-1998,<br>2009-2012 | 0  |
| Viet Nam                 | Hanoi             | 1991-1997               | 7  | 1991-1997               | 0  |
| Yemen                    | Aden              | 1997-2011               | 5  | 2007-2011               | 0  |
| Zimbabwe                 | National Registry | 2005-2006               | 2  | 2005-2006               | 0  |
| Zimbabwe                 | Bulawayo          | 1963-1972               | 10 | 1963-1972               | 0  |
| Zimbabwe                 | Harare            | 1990-2013               | 24 | 1990-2013               | 0  |

Abbreviations: MIR, mortality to incidence ratio.

Footnote: Cancer registry incidence data is only used for estimating MIRs (column “Years used for MIR”) if both incidence and mortality data are available. While this manuscript only reports estimates from 2010-2019, the columns reporting the years of data used can include values greater than 10 because earlier years were used to estimate the entire GBD time series.

eTable 7: Covariates selected for CODEm for each GBD cancer group and expected direction of covariate

| Cause                   | Sex    | Age start | Age end   | Level | Direction | Covariate                                             |
|-------------------------|--------|-----------|-----------|-------|-----------|-------------------------------------------------------|
| Acute lymphoid leukemia | Male   | 0-6 days  | 95+ years | 2     | 1         | Tobacco (cigarettes per capita)                       |
| Acute lymphoid leukemia | Male   | 0-6 days  | 95+ years | 2     | 1         | Cumulative Cigarettes (10 Years)                      |
| Acute lymphoid leukemia | Male   | 0-6 days  | 95+ years | 2     | 1         | Cumulative Cigarettes (20 Years)                      |
| Acute lymphoid leukemia | Male   | 0-6 days  | 95+ years | 3     | -1        | Education (years per capita)                          |
| Acute lymphoid leukemia | Male   | 0-6 days  | 95+ years | 3     | -1        | LDI (I\$ per capita)                                  |
| Acute lymphoid leukemia | Male   | 0-6 days  | 95+ years | 2     | 1         | Mean BMI                                              |
| Acute lymphoid leukemia | Male   | 0-6 days  | 95+ years | 1     | 1         | Log-transformed SEV scalar: Leukemia                  |
| Acute lymphoid leukemia | Male   | 0-6 days  | 95+ years | 1     | 1         | Log-transformed age-standardized SEV scalar: Leukemia |
| Acute lymphoid leukemia | Male   | 0-6 days  | 95+ years | 3     | 1         | Socio-demographic Index                               |
| Acute lymphoid leukemia | Male   | 0-6 days  | 95+ years | 2     | -1        | Healthcare access and quality index                   |
| Acute lymphoid leukemia | Male   | 0-6 days  | 95+ years | 2     | 1         | Liters of alcohol consumed per capita                 |
| Acute lymphoid leukemia | Female | 0-6 days  | 95+ years | 2     | 1         | Tobacco (cigarettes per capita)                       |
| Acute lymphoid leukemia | Female | 0-6 days  | 95+ years | 2     | 1         | Cumulative Cigarettes (10 Years)                      |
| Acute lymphoid leukemia | Female | 0-6 days  | 95+ years | 2     | 1         | Cumulative Cigarettes (20 Years)                      |
| Acute lymphoid leukemia | Female | 0-6 days  | 95+ years | 3     | -1        | Education (years per capita)                          |
| Acute lymphoid leukemia | Female | 0-6 days  | 95+ years | 3     | -1        | LDI (I\$ per capita)                                  |
| Acute lymphoid leukemia | Female | 0-6 days  | 95+ years | 2     | 1         | Mean BMI                                              |
| Acute lymphoid leukemia | Female | 0-6 days  | 95+ years | 1     | 1         | Log-transformed SEV scalar: Leukemia                  |
| Acute lymphoid leukemia | Female | 0-6 days  | 95+ years | 1     | 1         | Log-transformed age-standardized SEV scalar: Leukemia |
| Acute lymphoid leukemia | Female | 0-6 days  | 95+ years | 3     | 1         | Socio-demographic Index                               |
| Acute lymphoid leukemia | Female | 0-6 days  | 95+ years | 2     | -1        | Healthcare access and quality index                   |
| Acute lymphoid leukemia | Female | 0-6 days  | 95+ years | 2     | 1         | Liters of alcohol consumed per capita                 |
| Acute myeloid leukemia  | Male   | 0-6 days  | 95+ years | 2     | 1         | Cumulative Cigarettes (10 Years)                      |
| Acute myeloid leukemia  | Male   | 0-6 days  | 95+ years | 2     | 1         | Cumulative Cigarettes (20 Years)                      |
| Acute myeloid leukemia  | Male   | 0-6 days  | 95+ years | 3     | -1        | Education (years per capita)                          |
| Acute myeloid leukemia  | Male   | 0-6 days  | 95+ years | 3     | 1         | LDI (I\$ per capita)                                  |
| Acute myeloid leukemia  | Male   | 0-6 days  | 95+ years | 2     | 1         | Mean BMI                                              |
| Acute myeloid leukemia  | Male   | 0-6 days  | 95+ years | 2     | 1         | Smoking Prevalence                                    |

|                        |        |             |           |   |    |                                                                |
|------------------------|--------|-------------|-----------|---|----|----------------------------------------------------------------|
| Acute myeloid leukemia | Male   | 0-6 days    | 95+ years | 1 | 1  | Log-transformed SEV scalar: Leukemia                           |
| Acute myeloid leukemia | Male   | 0-6 days    | 95+ years | 1 | 1  | Log-transformed age-standardized SEV scalar: Leukemia          |
| Acute myeloid leukemia | Male   | 0-6 days    | 95+ years | 3 | 1  | Socio-demographic Index                                        |
| Acute myeloid leukemia | Male   | 0-6 days    | 95+ years | 2 | -1 | Healthcare access and quality index                            |
| Acute myeloid leukemia | Male   | 0-6 days    | 95+ years | 2 | 1  | Liters of alcohol consumed per capita                          |
| Acute myeloid leukemia | Female | 0-6 days    | 95+ years | 2 | 1  | Cumulative Cigarettes (10 Years)                               |
| Acute myeloid leukemia | Female | 0-6 days    | 95+ years | 2 | 1  | Cumulative Cigarettes (20 Years)                               |
| Acute myeloid leukemia | Female | 0-6 days    | 95+ years | 3 | -1 | Education (years per capita)                                   |
| Acute myeloid leukemia | Female | 0-6 days    | 95+ years | 3 | 1  | LDI (I\$ per capita)                                           |
| Acute myeloid leukemia | Female | 0-6 days    | 95+ years | 2 | 1  | Mean BMI                                                       |
| Acute myeloid leukemia | Female | 0-6 days    | 95+ years | 2 | 1  | Smoking Prevalence                                             |
| Acute myeloid leukemia | Female | 0-6 days    | 95+ years | 1 | 1  | Log-transformed SEV scalar: Leukemia                           |
| Acute myeloid leukemia | Female | 0-6 days    | 95+ years | 1 | 1  | Log-transformed age-standardized SEV scalar: Leukemia          |
| Acute myeloid leukemia | Female | 0-6 days    | 95+ years | 3 | 1  | Socio-demographic Index                                        |
| Acute myeloid leukemia | Female | 0-6 days    | 95+ years | 2 | -1 | Healthcare access and quality index                            |
| Acute myeloid leukemia | Female | 0-6 days    | 95+ years | 2 | 1  | Liters of alcohol consumed per capita                          |
| Bladder cancer         | Male   | 15-19 years | 95+ years | 2 | 1  | Cumulative Cigarettes (10 Years)                               |
| Bladder cancer         | Male   | 15-19 years | 95+ years | 2 | 1  | Diabetes Fasting Plasma Glucose (mmol/L), age-standardized 25+ |
| Bladder cancer         | Male   | 15-19 years | 95+ years | 3 | 1  | LDI (I\$ per capita)                                           |
| Bladder cancer         | Male   | 15-19 years | 95+ years | 1 | 1  | Smoking Prevalence                                             |
| Bladder cancer         | Male   | 15-19 years | 95+ years | 1 | 1  | Schistosomiasis Prevalence Results                             |
| Bladder cancer         | Male   | 15-19 years | 95+ years | 1 | 1  | Log-transformed SEV scalar: Bladder C                          |
| Bladder cancer         | Male   | 15-19 years | 95+ years | 3 | 1  | Socio-demographic Index                                        |
| Bladder cancer         | Male   | 15-19 years | 95+ years | 2 | -1 | Healthcare access and quality index                            |
| Bladder cancer         | Male   | 15-19 years | 95+ years | 3 | 1  | Age- and sex-specific SEV for Low fruit                        |
| Bladder cancer         | Male   | 15-19 years | 95+ years | 2 | 1  | Age- and sex-specific SEV for Low vegetables                   |
| Bladder cancer         | Male   | 15-19 years | 95+ years | 2 | 1  | Liters of alcohol consumed per capita                          |
| Bladder cancer         | Female | 15-19 years | 95+ years | 2 | 1  | Cumulative Cigarettes (10 Years)                               |

|                                 |        |             |           |   |    |                                                                |
|---------------------------------|--------|-------------|-----------|---|----|----------------------------------------------------------------|
| Bladder cancer                  | Female | 15-19 years | 95+ years | 2 | 1  | Diabetes Fasting Plasma Glucose (mmol/L), age-standardized 25+ |
| Bladder cancer                  | Female | 15-19 years | 95+ years | 3 | 1  | LDI (I\$ per capita)                                           |
| Bladder cancer                  | Female | 15-19 years | 95+ years | 1 | 1  | Smoking Prevalence                                             |
| Bladder cancer                  | Female | 15-19 years | 95+ years | 1 | 1  | Schistosomiasis Prevalence Results                             |
| Bladder cancer                  | Female | 15-19 years | 95+ years | 1 | 1  | Log-transformed SEV scalar: Bladder C                          |
| Bladder cancer                  | Female | 15-19 years | 95+ years | 3 | 1  | Socio-demographic Index                                        |
| Bladder cancer                  | Female | 15-19 years | 95+ years | 2 | -1 | Healthcare access and quality index                            |
| Bladder cancer                  | Female | 15-19 years | 95+ years | 3 | 1  | Age- and sex-specific SEV for Low fruit                        |
| Bladder cancer                  | Female | 15-19 years | 95+ years | 2 | 1  | Age- and sex-specific SEV for Low vegetables                   |
| Bladder cancer                  | Female | 15-19 years | 95+ years | 2 | 1  | Liters of alcohol consumed per capita                          |
| Brain and nervous system cancer | Male   | 0-6 days    | 95+ years | 1 | 1  | Cumulative Cigarettes (10 Years)                               |
| Brain and nervous system cancer | Male   | 0-6 days    | 95+ years | 3 | -1 | Education (years per capita)                                   |
| Brain and nervous system cancer | Male   | 0-6 days    | 95+ years | 3 | -1 | LDI (I\$ per capita)                                           |
| Brain and nervous system cancer | Male   | 0-6 days    | 95+ years | 2 | 1  | Cholesterol (total, mean per capita)                           |
| Brain and nervous system cancer | Male   | 0-6 days    | 95+ years | 2 | 1  | Systolic Blood Pressure (mmHg)                                 |
| Brain and nervous system cancer | Male   | 0-6 days    | 95+ years | 1 | 1  | Smoking Prevalence                                             |
| Brain and nervous system cancer | Male   | 0-6 days    | 95+ years | 3 | 1  | Socio-demographic index                                        |
| Brain and nervous system cancer | Male   | 0-6 days    | 95+ years | 2 | -1 | Healthcare access and quality index                            |
| Brain and nervous system cancer | Male   | 0-6 days    | 95+ years | 2 | 1  | Age- and sex- specific SEV for low fruit                       |
| Brain and nervous system cancer | Male   | 0-6 days    | 95+ years | 2 | 1  | Age- and sex- specific SEV for Low vegetables                  |
| Brain and nervous system cancer | Male   | 0-6 days    | 95+ years | 2 | 1  | Age- and sex-specific SEV for High red meat                    |
| Brain and nervous system cancer | Male   | 0-6 days    | 95+ years | 1 | 1  | Liters of alcohol consumed per capita                          |
| Brain and nervous system cancer | Female | 0-6 days    | 95+ years | 1 | 1  | Cumulative Cigarettes (10 Years)                               |
| Brain and nervous system cancer | Female | 0-6 days    | 95+ years | 3 | -1 | Education (years per capita)                                   |
| Brain and nervous system cancer | Female | 0-6 days    | 95+ years | 3 | -1 | LDI (I\$ per capita)                                           |
| Brain and nervous system cancer | Female | 0-6 days    | 95+ years | 2 | 1  | Cholesterol (total, mean per capita)                           |
| Brain and nervous system cancer | Female | 0-6 days    | 95+ years | 2 | 1  | Systolic Blood Pressure (mmHg)                                 |
| Brain and nervous system cancer | Female | 0-6 days    | 95+ years | 1 | 1  | Smoking Prevalence                                             |
| Brain and nervous system cancer | Female | 0-6 days    | 95+ years | 3 | 1  | Socio-demographic index                                        |



|                                 |        |             |           |   |    |                                                                |
|---------------------------------|--------|-------------|-----------|---|----|----------------------------------------------------------------|
| Brain and nervous system cancer | Female | 0-6 days    | 95+ years | 2 | -1 | Healthcare access and quality index                            |
| Brain and nervous system cancer | Female | 0-6 days    | 95+ years | 2 | 1  | Age- and sex- specific SEV for low fruit                       |
| Brain and nervous system cancer | Female | 0-6 days    | 95+ years | 2 | 1  | Age- and sex- specific SEV for Low vegetables                  |
| Brain and nervous system cancer | Female | 0-6 days    | 95+ years | 2 | 1  | Age- and sex-specific SEV for High red meat                    |
| Brain and nervous system cancer | Female | 0-6 days    | 95+ years | 1 | 1  | Liters of alcohol consumed per capita                          |
| Breast cancer                   | Male   | 15-19 years | 95+ years | 2 | 1  | Cumulative cigarettes (10 years)                               |
| Breast cancer                   | Male   | 15-19 years | 95+ years | 2 | 1  | Cumulative cigarettes (20 years)                               |
| Breast cancer                   | Male   | 15-19 years | 95+ years | 2 | 1  | Diabetes Fasting Plasma Glucose (mmol/L), age-standardized 25+ |
| Breast cancer                   | Male   | 15-19 years | 95+ years | 1 | 1  | Mean BMI                                                       |
| Breast cancer                   | Male   | 15-19 years | 95+ years | 1 | 1  | Total Fertility Rate                                           |
| Breast cancer                   | Male   | 15-19 years | 95+ years | 2 | 1  | Socio-demographic index                                        |
| Breast cancer                   | Male   | 15-19 years | 95+ years | 1 | 1  | Age- and sex- specific SEV for low fruit                       |
| Breast cancer                   | Male   | 15-19 years | 95+ years | 1 | 1  | Liters of alcohol consumed per capita                          |
| Breast cancer                   | Male   | 15-19 years | 95+ years | 2 | -1 | Healthcare access and quality index                            |
| Breast cancer                   | Male   | 15-19 years | 95+ years | 2 | 1  | Age- and sex- specific SEV for low fruit                       |
| Breast cancer                   | Male   | 15-19 years | 95+ years | 2 | 1  | Age- and sex- specific SEV for Low vegetables                  |
| Breast cancer                   | Male   | 15-19 years | 95+ years | 1 | 1  | Liters of alcohol consumed per capita                          |
| Breast cancer                   | Female | 15-19 years | 95+ years | 2 | -1 | Age-specific fertility rate                                    |
| Breast cancer                   | Female | 15-19 years | 95+ years | 2 | 1  | Cumulative cigarettes (10 years)                               |
| Breast cancer                   | Female | 15-19 years | 95+ years | 2 | 1  | Cumulative cigarettes (20 years)                               |
| Breast cancer                   | Female | 15-19 years | 95+ years | 2 | 1  | Diabetes Fasting Plasma Glucose (mmol/L), age-standardized 25+ |
| Breast cancer                   | Female | 15-19 years | 95+ years | 3 | -1 | LDI (I\$ per capita)                                           |
| Breast cancer                   | Female | 15-19 years | 95+ years | 1 | 1  | Mean BMI                                                       |
| Breast cancer                   | Female | 15-19 years | 95+ years | 2 | 1  | Smoking Prevalence                                             |
| Breast cancer                   | Female | 15-19 years | 95+ years | 2 | -1 | Total Fertility Rate                                           |
| Breast cancer                   | Female | 15-19 years | 95+ years | 1 | 1  | Log-transformed SEV scalar: Breast C                           |
| Breast cancer                   | Female | 15-19 years | 95+ years | 3 | 1  | Socio-demographic index                                        |
| Breast cancer                   | Female | 15-19 years | 95+ years | 2 | -1 | Healthcare access and quality index                            |

|                           |        |             |           |   |    |                                                       |
|---------------------------|--------|-------------|-----------|---|----|-------------------------------------------------------|
| Breast cancer             | Female | 15-19 years | 95+ years | 2 | 1  | Age- and sex- specific SEV for low fruit              |
| Breast cancer             | Female | 15-19 years | 95+ years | 2 | 1  | Age- and sex- specific SEV for Low vegetables         |
| Breast cancer             | Female | 15-19 years | 95+ years | 1 | 1  | Liters of alcohol consumed per capita                 |
| Cervical cancer           | Female | 15-19 years | 95+ years | 2 | 1  | Age-specific fertility rate                           |
| Cervical cancer           | Female | 15-19 years | 95+ years | 1 | 1  | Cumulative Cigarettes (5 Years)                       |
| Cervical cancer           | Female | 15-19 years | 95+ years | 3 | -1 | Education (years per capita)                          |
| Cervical cancer           | Female | 15-19 years | 95+ years | 3 | -1 | LDI (I\$ per capita)                                  |
| Cervical cancer           | Female | 15-19 years | 95+ years | 2 | 1  | Smoking Prevalence                                    |
| Cervical cancer           | Female | 15-19 years | 95+ years | 2 | 1  | Total Fertility Rate                                  |
| Cervical cancer           | Female | 15-19 years | 95+ years | 3 | -1 | Socio-demographic index                               |
| Cervical cancer           | Female | 15-19 years | 95+ years | 1 | 1  | HIV age-standardized prevalence                       |
| Cervical cancer           | Female | 15-19 years | 95+ years | 2 | -1 | Healthcare access and quality index                   |
| Cervical cancer           | Female | 15-19 years | 95+ years | 2 | 1  | Age- and sex- specific SEV for low fruit              |
| Cervical cancer           | Female | 15-19 years | 95+ years | 2 | 1  | Age- and sex- specific SEV for Low vegetables         |
| Chronic lymphoid leukemia | Male   | 20-24 years | 95+ years | 2 | 1  | Tobacco (cigarettes per capita)                       |
| Chronic lymphoid leukemia | Male   | 20-24 years | 95+ years | 2 | 1  | Cumulative cigarettes (10 years)                      |
| Chronic lymphoid leukemia | Male   | 20-24 years | 95+ years | 2 | 1  | Cumulative cigarettes (15 years)                      |
| Chronic lymphoid leukemia | Male   | 20-24 years | 95+ years | 2 | 1  | Cumulative cigarettes (20 years)                      |
| Chronic lymphoid leukemia | Male   | 20-24 years | 95+ years | 2 | 1  | Cumulative cigarettes (5 years)                       |
| Chronic lymphoid leukemia | Male   | 20-24 years | 95+ years | 3 | -1 | Education (years per capita)                          |
| Chronic lymphoid leukemia | Male   | 20-24 years | 95+ years | 3 | -1 | LDI (I\$ per capita)                                  |
| Chronic lymphoid leukemia | Male   | 20-24 years | 95+ years | 2 | 1  | Mean BMI                                              |
| Chronic lymphoid leukemia | Male   | 20-24 years | 95+ years | 2 | 1  | Smoking Prevalence                                    |
| Chronic lymphoid leukemia | Male   | 20-24 years | 95+ years | 1 | 1  | Log-transformed SEV scalar: Leukemia                  |
| Chronic lymphoid leukemia | Male   | 20-24 years | 95+ years | 1 | 1  | Log-transformed age-standardized SEV scalar: Leukemia |
| Chronic lymphoid leukemia | Male   | 20-24 years | 95+ years | 3 | 1  | Socio-demographic Index                               |
| Chronic lymphoid leukemia | Male   | 20-24 years | 95+ years | 2 | -1 | Healthcare access and quality index                   |
| Chronic lymphoid leukemia | Male   | 20-24 years | 95+ years | 2 | 1  | Liters of alcohol consumed per capita                 |
| Chronic lymphoid leukemia | Female | 20-24 years | 95+ years | 2 | 1  | Tobacco (cigarettes per capita)                       |
| Chronic lymphoid leukemia | Female | 20-24 years | 95+ years | 2 | 1  | Cumulative cigarettes (10 years)                      |

|                                 |        |             |           |   |    |                                                       |
|---------------------------------|--------|-------------|-----------|---|----|-------------------------------------------------------|
| Chronic lymphoid leukemia       | Female | 20-24 years | 95+ years | 2 | 1  | Cumulative cigarettes (15 years)                      |
| Chronic lymphoid leukemia       | Female | 20-24 years | 95+ years | 2 | 1  | Cumulative cigarettes (20 years)                      |
| Chronic lymphoid leukemia       | Female | 20-24 years | 95+ years | 2 | 1  | Cumulative cigarettes (5 years)                       |
| Chronic lymphoid leukemia       | Female | 20-24 years | 95+ years | 3 | -1 | Education (years per capita)                          |
| Chronic lymphoid leukemia       | Female | 20-24 years | 95+ years | 3 | -1 | LDI (I\$ per capita)                                  |
| Chronic lymphoid leukemia       | Female | 20-24 years | 95+ years | 2 | 1  | Mean BMI                                              |
| Chronic lymphoid leukemia       | Female | 20-24 years | 95+ years | 2 | 1  | Smoking Prevalence                                    |
| Chronic lymphoid leukemia       | Female | 20-24 years | 95+ years | 1 | 1  | Log-transformed SEV scalar: Leukemia                  |
| Chronic lymphoid leukemia       | Female | 20-24 years | 95+ years | 1 | 1  | Log-transformed age-standardized SEV scalar: Leukemia |
| Chronic lymphoid leukemia       | Female | 20-24 years | 95+ years | 3 | 1  | Socio-demographic Index                               |
| Chronic lymphoid leukemia (DR)  | Female | 20-24 years | 95+ years | 2 | -1 | Healthcare access and quality index                   |
| Chronic lymphoid leukemia (GLB) | Female | 20-24 years | 95+ years | 1 | 1  | Healthcare access and quality index                   |
| Chronic lymphoid leukemia       | Female | 20-24 years | 95+ years | 2 | 1  | Liters of alcohol consumed per capita                 |
| Chronic myeloid leukemia        | Male   | 0-6 days    | 95+ years | 2 | 1  | Tobacco (cigarettes per capita)                       |
| Chronic myeloid leukemia        | Male   | 0-6 days    | 95+ years | 2 | 1  | Cumulative cigarettes (10 years)                      |
| Chronic myeloid leukemia        | Male   | 0-6 days    | 95+ years | 2 | 1  | Cumulative cigarettes (15 years)                      |
| Chronic myeloid leukemia        | Male   | 0-6 days    | 95+ years | 2 | 1  | Cumulative cigarettes (20 years)                      |
| Chronic myeloid leukemia        | Male   | 0-6 days    | 95+ years | 2 | 1  | Cumulative cigarettes (5 years)                       |
| Chronic myeloid leukemia        | Male   | 0-6 days    | 95+ years | 3 | -1 | Education (years per capita)                          |
| Chronic myeloid leukemia        | Male   | 0-6 days    | 95+ years | 3 | 1  | LDI (I\$ per capita)                                  |
| Chronic myeloid leukemia        | Male   | 0-6 days    | 95+ years | 2 | 1  | Mean BMI                                              |
| Chronic myeloid leukemia        | Male   | 0-6 days    | 95+ years | 2 | 1  | Smoking Prevalence                                    |
| Chronic myeloid leukemia        | Male   | 0-6 days    | 95+ years | 1 | 1  | Log-transformed SEV scalar: Leukemia                  |
| Chronic myeloid leukemia        | Male   | 0-6 days    | 95+ years | 1 | 1  | Log-transformed age-standardized SEV scalar: Leukemia |
| Chronic myeloid leukemia        | Male   | 0-6 days    | 95+ years | 3 | -1 | Socio-demographic Index                               |
| Chronic myeloid leukemia        | Male   | 0-6 days    | 95+ years | 2 | -1 | Healthcare access and quality index                   |
| Chronic myeloid leukemia        | Male   | 0-6 days    | 95+ years | 2 | 1  | Liters of alcohol consumed per capita                 |
| Chronic myeloid leukemia        | Female | 0-6 days    | 95+ years | 2 | 1  | Tobacco (cigarettes per capita)                       |
| Chronic myeloid leukemia        | Female | 0-6 days    | 95+ years | 2 | 1  | Cumulative cigarettes (10 years)                      |
| Chronic myeloid leukemia        | Female | 0-6 days    | 95+ years | 2 | 1  | Cumulative cigarettes (15 years)                      |

|                          |        |           |           |   |    |                                                                |
|--------------------------|--------|-----------|-----------|---|----|----------------------------------------------------------------|
| Chronic myeloid leukemia | Female | 0-6 days  | 95+ years | 2 | 1  | Cumulative cigarettes (20 years)                               |
| Chronic myeloid leukemia | Female | 0-6 days  | 95+ years | 2 | 1  | Cumulative cigarettes (5 years)                                |
| Chronic myeloid leukemia | Female | 0-6 days  | 95+ years | 3 | -1 | Education (years per capita)                                   |
| Chronic myeloid leukemia | Female | 0-6 days  | 95+ years | 3 | 1  | LDI (I\$ per capita)                                           |
| Chronic myeloid leukemia | Female | 0-6 days  | 95+ years | 2 | 1  | Mean BMI                                                       |
| Chronic myeloid leukemia | Female | 0-6 days  | 95+ years | 2 | 1  | Smoking Prevalence                                             |
| Chronic myeloid leukemia | Female | 0-6 days  | 95+ years | 1 | 1  | Log-transformed SEV scalar: Leukemia                           |
| Chronic myeloid leukemia | Female | 0-6 days  | 95+ years | 1 | 1  | Log-transformed age-standardized SEV scalar: Leukemia          |
| Chronic myeloid leukemia | Female | 0-6 days  | 95+ years | 3 | -1 | Socio-demographic Index                                        |
| Chronic myeloid leukemia | Female | 0-6 days  | 95+ years | 2 | -1 | Healthcare access and quality index                            |
| Chronic myeloid leukemia | Female | 0-6 days  | 95+ years | 2 | 1  | Liters of alcohol consumed per capita                          |
| Colon and rectum cancer  | Male   | 5-9 years | 95+ years | 1 | 1  | Tobacco (cigarettes per capita)                                |
| Colon and rectum cancer  | Male   | 5-9 years | 95+ years | 2 | 1  | Cumulative cigarettes (20 years)                               |
| Colon and rectum cancer  | Male   | 5-9 years | 95+ years | 2 | 1  | Diabetes Fasting Plasma Glucose (mmol/L), age-standardized 25+ |
| Colon and rectum cancer  | Male   | 5-9 years | 95+ years | 3 | -1 | Education (years per capita)                                   |
| Colon and rectum cancer  | Male   | 5-9 years | 95+ years | 3 | 1  | LDI (I\$ per capita)                                           |
| Colon and rectum cancer  | Male   | 5-9 years | 95+ years | 1 | 1  | Mean BMI                                                       |
| Colon and rectum cancer  | Male   | 5-9 years | 95+ years | 1 | 1  | Log-transformed SEV scalar: Colorect C                         |
| Colon and rectum cancer  | Male   | 5-9 years | 95+ years | 3 | 1  | Socio-demographic index                                        |
| Colon and rectum cancer  | Male   | 5-9 years | 95+ years | 2 | -1 | PUFA adjusted(percent)                                         |
| Colon and rectum cancer  | Male   | 5-9 years | 95+ years | 3 | -1 | Healthcare access and quality index                            |
| Colon and rectum cancer  | Male   | 5-9 years | 95+ years | 1 | -1 | Total Physical Activity (MET-min/week), Age-specific           |
| Colon and rectum cancer  | Male   | 5-9 years | 95+ years | 3 | 1  | Age- and sex- specific SEV for low fruit                       |
| Colon and rectum cancer  | Male   | 5-9 years | 95+ years | 2 | 1  | Age- and sex- specific SEV for Low vegetables                  |
| Colon and rectum cancer  | Male   | 5-9 years | 95+ years | 3 | 1  | Age- and sex-specific SEV for Low nuts and seeds               |
| Colon and rectum cancer  | Male   | 5-9 years | 95+ years | 3 | 1  | Age- and sex-specific SEV for Low milk                         |
| Colon and rectum cancer  | Male   | 5-9 years | 95+ years | 1 | 1  | Age- and sex-specific SEV for High red meat                    |
| Colon and rectum cancer  | Male   | 5-9 years | 95+ years | 2 | 1  | Age- and sex-specific SEV for Low fiber                        |
| Colon and rectum cancer  | Male   | 5-9 years | 95+ years | 2 | 1  | Age- and sex-specific SEV for Low calcium                      |

|                         |        |             |           |   |    |                                                                |
|-------------------------|--------|-------------|-----------|---|----|----------------------------------------------------------------|
| Colon and rectum cancer | Male   | 5-9 years   | 95+ years | 2 | 1  | Liters of alcohol consumed per capita                          |
| Colon and rectum cancer | Female | 5-9 years   | 95+ years | 1 | 1  | Tobacco (cigarettes per capita)                                |
| Colon and rectum cancer | Female | 5-9 years   | 95+ years | 2 | 1  | Cumulative cigarettes (5 years)                                |
| Colon and rectum cancer | Female | 5-9 years   | 95+ years | 2 | 1  | Diabetes Fasting Plasma Glucose (mmol/L), age-standardized 25+ |
| Colon and rectum cancer | Female | 5-9 years   | 95+ years | 3 | -1 | Education (years per capita)                                   |
| Colon and rectum cancer | Female | 5-9 years   | 95+ years | 3 | 1  | LDI (I\$ per capita)                                           |
| Colon and rectum cancer | Female | 5-9 years   | 95+ years | 1 | 1  | Mean BMI                                                       |
| Colon and rectum cancer | Female | 5-9 years   | 95+ years | 1 | 1  | Log-transformed SEV scalar: Colorect C                         |
| Colon and rectum cancer | Female | 5-9 years   | 95+ years | 3 | 1  | Socio-demographic Index                                        |
| Colon and rectum cancer | Female | 5-9 years   | 95+ years | 2 | -1 | PUFA adjusted(percent)                                         |
| Colon and rectum cancer | Female | 5-9 years   | 95+ years | 3 | -1 | Healthcare access and quality index                            |
| Colon and rectum cancer | Female | 5-9 years   | 95+ years | 1 | -1 | Total Physical Activity (MET-min/week), Age-specific           |
| Colon and rectum cancer | Female | 5-9 years   | 95+ years | 3 | 1  | Age- and sex- specific SEV for low fruit                       |
| Colon and rectum cancer | Female | 5-9 years   | 95+ years | 2 | 1  | Age- and sex- specific SEV for Low vegetables                  |
| Colon and rectum cancer | Female | 5-9 years   | 95+ years | 3 | 1  | Age- and sex-specific SEV for Low nuts and seeds               |
| Colon and rectum cancer | Female | 5-9 years   | 95+ years | 3 | 1  | Age- and sex-specific SEV for Low milk                         |
| Colon and rectum cancer | Female | 5-9 years   | 95+ years | 1 | 1  | Age- and sex-specific SEV for High red meat                    |
| Colon and rectum cancer | Female | 5-9 years   | 95+ years | 2 | 1  | Age- and sex-specific SEV for Low fiber                        |
| Colon and rectum cancer | Female | 5-9 years   | 95+ years | 2 | 1  | Age- and sex-specific SEV for Low calcium                      |
| Colon and rectum cancer | Female | 5-9 years   | 95+ years | 2 | 1  | Liters of alcohol consumed per capita                          |
| Esophageal cancer       | Male   | 20-24 years | 95+ years | 2 | 1  | Tobacco (cigarettes per capita)                                |
| Esophageal cancer       | Male   | 20-24 years | 95+ years | 3 | -1 | Education (years per capita)                                   |
| Esophageal cancer       | Male   | 20-24 years | 95+ years | 3 | 1  | LDI (I\$ per capita)                                           |
| Esophageal cancer       | Male   | 20-24 years | 95+ years | 1 | 1  | Mean BMI                                                       |
| Esophageal cancer       | Male   | 20-24 years | 95+ years | 2 | 1  | Indoor Air Pollution (All Cooking Fuels)                       |
| Esophageal cancer       | Male   | 20-24 years | 95+ years | 3 | -1 | Sanitation (proportion with access)                            |
| Esophageal cancer       | Male   | 20-24 years | 95+ years | 1 | 1  | Smoking Prevalence                                             |
| Esophageal cancer       | Male   | 20-24 years | 95+ years | 3 | -1 | Improved Water Source (proportion with access)                 |
| Esophageal cancer       | Male   | 20-24 years | 95+ years | 1 | 1  | Log-transformed age-standardized SEV scalar: Esophag C         |

|                                      |        |             |           |   |    |                                                        |
|--------------------------------------|--------|-------------|-----------|---|----|--------------------------------------------------------|
| Esophageal cancer                    | Male   | 20-24 years | 95+ years | 3 | 1  | Socio-demographic Index                                |
| Esophageal cancer                    | Male   | 20-24 years | 95+ years | 2 | -1 | Healthcare access and quality index                    |
| Esophageal cancer                    | Male   | 20-24 years | 95+ years | 2 | 1  | Age- and sex- specific SEV for low fruit               |
| Esophageal cancer                    | Male   | 20-24 years | 95+ years | 2 | 1  | Age- and sex- specific SEV for Low vegetables          |
| Esophageal cancer                    | Male   | 20-24 years | 95+ years | 1 | 1  | Liters of alcohol consumed per capita                  |
| Esophageal cancer                    | Female | 20-24 years | 95+ years | 2 | 1  | Tobacco (cigarettes per capita)                        |
| Esophageal cancer                    | Female | 20-24 years | 95+ years | 3 | -1 | Education (years per capita)                           |
| Esophageal cancer                    | Female | 20-24 years | 95+ years | 3 | 1  | LDI (I\$ per capita)                                   |
| Esophageal cancer                    | Female | 20-24 years | 95+ years | 1 | 1  | Mean BMI                                               |
| Esophageal cancer                    | Female | 20-24 years | 95+ years | 2 | 1  | Indoor Air Pollution (All Cooking Fuels)               |
| Esophageal cancer                    | Female | 20-24 years | 95+ years | 3 | -1 | Sanitation (proportion with access)                    |
| Esophageal cancer                    | Female | 20-24 years | 95+ years | 1 | 1  | Smoking Prevalence                                     |
| Esophageal cancer                    | Female | 20-24 years | 95+ years | 3 | -1 | Improved Water Source (proportion with access)         |
| Esophageal cancer                    | Female | 20-24 years | 95+ years | 1 | 1  | Log-transformed age-standardized SEV scalar: Esophag C |
| Esophageal cancer                    | Female | 20-24 years | 95+ years | 3 | 1  | Socio-demographic Index                                |
| Esophageal cancer                    | Female | 20-24 years | 95+ years | 2 | -1 | Healthcare access and quality index                    |
| Esophageal cancer                    | Female | 20-24 years | 95+ years | 2 | 1  | Age- and sex- specific SEV for low fruit               |
| Esophageal cancer                    | Female | 20-24 years | 95+ years | 2 | 1  | Age- and sex- specific SEV for Low vegetables          |
| Esophageal cancer                    | Female | 20-24 years | 95+ years | 1 | 1  | Liters of alcohol consumed per capita                  |
| Gallbladder and biliary tract cancer | Male   | 20-24 years | 95+ years | 2 | 1  | Tobacco (cigarettes per capita)                        |
| Gallbladder and biliary tract cancer | Male   | 20-24 years | 95+ years | 2 | 1  | Cumulative cigarettes (10 years)                       |
| Gallbladder and biliary tract cancer | Male   | 20-24 years | 95+ years | 2 | 1  | Cumulative Cigarettes (5 Years)                        |
| Gallbladder and biliary tract cancer | Male   | 20-24 years | 95+ years | 2 | 1  | Diabetes Age-Standardized Prevalence (proportion)      |
| Gallbladder and biliary tract cancer | Male   | 20-24 years | 95+ years | 3 | -1 | Education (years per capita)                           |
| Gallbladder and biliary tract cancer | Male   | 20-24 years | 95+ years | 3 | 1  | LDI (I\$ per capita)                                   |
| Gallbladder and biliary tract cancer | Male   | 20-24 years | 95+ years | 1 | 1  | Mean BMI                                               |
| Gallbladder and biliary tract cancer | Male   | 20-24 years | 95+ years | 2 | 1  | Smoking Prevalence                                     |
| Gallbladder and biliary tract cancer | Male   | 20-24 years | 95+ years | 1 | 1  | Log-transformed SEV scalar: Gallblad C                 |
| Gallbladder and biliary tract cancer | Male   | 20-24 years | 95+ years | 3 | -1 | Socio-demographic Index                                |
| Gallbladder and biliary tract cancer | Male   | 20-24 years | 95+ years | 2 | -1 | Healthcare access and quality index                    |

|                                      |        |             |           |   |    |                                                   |
|--------------------------------------|--------|-------------|-----------|---|----|---------------------------------------------------|
| Gallbladder and biliary tract cancer | Male   | 20-24 years | 95+ years | 2 | 1  | Age- and sex- specific SEV for low fruit          |
| Gallbladder and biliary tract cancer | Male   | 20-24 years | 95+ years | 2 | 1  | Age- and sex- specific SEV for Low vegetables     |
| Gallbladder and biliary tract cancer | Male   | 20-24 years | 95+ years | 2 | 1  | Liters of alcohol consumed per capita             |
| Gallbladder and biliary tract cancer | Female | 20-24 years | 95+ years | 2 | 1  | Tobacco (cigarettes per capita)                   |
| Gallbladder and biliary tract cancer | Female | 20-24 years | 95+ years | 2 | 1  | Cumulative cigarettes (10 years)                  |
| Gallbladder and biliary tract cancer | Female | 20-24 years | 95+ years | 2 | 1  | Cumulative Cigarettes (5 Years)                   |
| Gallbladder and biliary tract cancer | Female | 20-24 years | 95+ years | 2 | 1  | Diabetes Age-Standardized Prevalence (proportion) |
| Gallbladder and biliary tract cancer | Female | 20-24 years | 95+ years | 3 | -1 | Education (years per capita)                      |
| Gallbladder and biliary tract cancer | Female | 20-24 years | 95+ years | 3 | 1  | LDI (I\$ per capita)                              |
| Gallbladder and biliary tract cancer | Female | 20-24 years | 95+ years | 1 | 1  | Mean BMI                                          |
| Gallbladder and biliary tract cancer | Female | 20-24 years | 95+ years | 2 | 1  | Smoking Prevalence                                |
| Gallbladder and biliary tract cancer | Female | 20-24 years | 95+ years | 1 | 1  | Log-transformed SEV scalar: Gallblad C            |
| Gallbladder and biliary tract cancer | Female | 20-24 years | 95+ years | 3 | -1 | Socio-demographic Index                           |
| Gallbladder and biliary tract cancer | Female | 20-24 years | 95+ years | 2 | -1 | Healthcare access and quality index               |
| Gallbladder and biliary tract cancer | Female | 20-24 years | 95+ years | 2 | 1  | Age- and sex- specific SEV for low fruit          |
| Gallbladder and biliary tract cancer | Female | 20-24 years | 95+ years | 2 | 1  | Age- and sex- specific SEV for Low vegetables     |
| Gallbladder and biliary tract cancer | Female | 20-24 years | 95+ years | 2 | 1  | Liters of alcohol consumed per capita             |
| Hodgkin lymphoma                     | Male   | 1-4 years   | 95+ years | 3 | -1 | Education (years per capita)                      |
| Hodgkin lymphoma                     | Male   | 1-4 years   | 95+ years | 3 | -1 | LDI (I\$ per capita)                              |
| Hodgkin lymphoma                     | Male   | 1-4 years   | 95+ years | 3 | -1 | Socio-demographic Index                           |
| Hodgkin lymphoma                     | Male   | 1-4 years   | 95+ years | 2 | -1 | Healthcare access and quality index               |
| Hodgkin lymphoma                     | Female | 1-4 years   | 95+ years | 3 | -1 | Education (years per capita)                      |
| Hodgkin lymphoma                     | Female | 1-4 years   | 95+ years | 3 | -1 | LDI (I\$ per capita)                              |
| Hodgkin lymphoma                     | Female | 1-4 years   | 95+ years | 3 | -1 | Socio-demographic Index                           |
| Hodgkin lymphoma                     | Female | 1-4 years   | 95+ years | 2 | -1 | Healthcare access and quality index               |
| Kidney cancer                        | Male   | 0-6 days    | 95+ years | 1 | 1  | Tobacco (cigarettes per capita)                   |
| Kidney cancer                        | Male   | 0-6 days    | 95+ years | 1 | 1  | Cumulative cigarettes (10 years)                  |
| Kidney cancer                        | Male   | 0-6 days    | 95+ years | 2 | 1  | Diabetes Age-Standardized Prevalence (proportion) |
| Kidney cancer                        | Male   | 0-6 days    | 95+ years | 3 | -1 | Education (years per capita)                      |
| Kidney cancer                        | Male   | 0-6 days    | 95+ years | 3 | 1  | LDI (I\$ per capita)                              |

|               |        |             |           |   |    |                                                        |
|---------------|--------|-------------|-----------|---|----|--------------------------------------------------------|
| Kidney cancer | Male   | 0-6 days    | 95+ years | 1 | 1  | Mean BMI                                               |
| Kidney cancer | Male   | 0-6 days    | 95+ years | 2 | 1  | Systolic Blood Pressure (mmHg)                         |
| Kidney cancer | Male   | 0-6 days    | 95+ years | 1 | 1  | Log-transformed SEV scalar: Kidney C                   |
| Kidney cancer | Male   | 0-6 days    | 95+ years | 3 | 1  | Socio-demographic Index                                |
| Kidney cancer | Male   | 0-6 days    | 95+ years | 2 | -1 | Healthcare access and quality index                    |
| Kidney cancer | Male   | 0-6 days    | 95+ years | 2 | 1  | Liters of alcohol consumed per capita                  |
| Kidney cancer | Female | 0-6 days    | 95+ years | 1 | 1  | Tobacco (cigarettes per capita)                        |
| Kidney cancer | Female | 0-6 days    | 95+ years | 1 | 1  | Cumulative cigarettes (10 years)                       |
| Kidney cancer | Female | 0-6 days    | 95+ years | 2 | 1  | Diabetes Age-Standardized Prevalence (proportion)      |
| Kidney cancer | Female | 0-6 days    | 95+ years | 3 | -1 | Education (years per capita)                           |
| Kidney cancer | Female | 0-6 days    | 95+ years | 3 | 1  | LDI (I\$ per capita)                                   |
| Kidney cancer | Female | 0-6 days    | 95+ years | 1 | 1  | Mean BMI                                               |
| Kidney cancer | Female | 0-6 days    | 95+ years | 2 | 1  | Systolic Blood Pressure (mmHg)                         |
| Kidney cancer | Female | 0-6 days    | 95+ years | 1 | 1  | Log-transformed SEV scalar: Kidney C                   |
| Kidney cancer | Female | 0-6 days    | 95+ years | 3 | 1  | Socio-demographic Index                                |
| Kidney cancer | Female | 0-6 days    | 95+ years | 2 | -1 | Healthcare access and quality index                    |
| Kidney cancer | Female | 0-6 days    | 95+ years | 2 | 1  | Liters of alcohol consumed per capita                  |
| Larynx cancer | Male   | 20-24 years | 95+ years | 2 | 1  | Cumulative cigarettes (10 years)                       |
| Larynx cancer | Male   | 20-24 years | 95+ years | 2 | 1  | Cumulative cigarettes (20 years)                       |
| Larynx cancer | Male   | 20-24 years | 95+ years | 3 | 1  | LDI (I\$ per capita)                                   |
| Larynx cancer | Male   | 20-24 years | 95+ years | 2 | 1  | Population Density (over 1000 ppl/sqkm, proportion)    |
| Larynx cancer | Male   | 20-24 years | 95+ years | 2 | 1  | Smoking Prevalence                                     |
| Larynx cancer | Male   | 20-24 years | 95+ years | 1 | 1  | Log-transformed SEV scalar: Larynx C                   |
| Larynx cancer | Male   | 20-24 years | 95+ years | 3 | 1  | Socio-demographic Index                                |
| Larynx cancer | Male   | 20-24 years | 95+ years | 2 | -1 | Healthcare access and quality index                    |
| Larynx cancer | Male   | 20-24 years | 95+ years | 2 | 1  | Asbestos consumption (metric tons per year per capita) |
| Larynx cancer | Male   | 20-24 years | 95+ years | 2 | 1  | Age- and sex- specific SEV for low fruit               |
| Larynx cancer | Male   | 20-24 years | 95+ years | 3 | 1  | Age- and sex- specific SEV for Low vegetables          |
| Larynx cancer | Male   | 20-24 years | 95+ years | 1 | 1  | Liters of alcohol consumed per capita                  |
| Larynx cancer | Female | 20-24 years | 95+ years | 2 | 1  | Cumulative cigarettes (10 years)                       |



|               |        |             |           |   |    |                                                        |
|---------------|--------|-------------|-----------|---|----|--------------------------------------------------------|
| Larynx cancer | Female | 20-24 years | 95+ years | 2 | 1  | Cumulative cigarettes (20 years)                       |
| Larynx cancer | Female | 20-24 years | 95+ years | 3 | 1  | LDI (I\$ per capita)                                   |
| Larynx cancer | Female | 20-24 years | 95+ years | 2 | 1  | Population Density (over 1000 ppl/sqkm, proportion)    |
| Larynx cancer | Female | 20-24 years | 95+ years | 2 | 1  | Smoking Prevalence                                     |
| Larynx cancer | Female | 20-24 years | 95+ years | 1 | 1  | Log-transformed SEV scalar: Larynx C                   |
| Larynx cancer | Female | 20-24 years | 95+ years | 3 | 1  | Socio-demographic Index                                |
| Larynx cancer | Female | 20-24 years | 95+ years | 2 | -1 | Healthcare access and quality index                    |
| Larynx cancer | Female | 20-24 years | 95+ years | 2 | 1  | Asbestos consumption (metric tons per year per capita) |
| Larynx cancer | Female | 20-24 years | 95+ years | 3 | 1  | Age- and sex- specific SEV for low fruit               |
| Larynx cancer | Female | 20-24 years | 95+ years | 2 | 1  | Age- and sex- specific SEV for Low vegetables          |
| Larynx cancer | Female | 20-24 years | 95+ years | 1 | 1  | Liters of alcohol consumed per capita                  |
| Leukemia      | Male   | 0-6 days    | 95+ years | 2 | 1  | Tobacco (cigarettes per capita)                        |
| Leukemia      | Male   | 0-6 days    | 95+ years | 2 | 1  | Cumulative cigarettes (10 years)                       |
| Leukemia      | Male   | 0-6 days    | 95+ years | 2 | 1  | Cumulative cigarettes (20 years)                       |
| Leukemia      | Male   | 0-6 days    | 95+ years | 3 | -1 | Education (years per capita)                           |
| Leukemia      | Male   | 0-6 days    | 95+ years | 3 | 1  | LDI (I\$ per capita)                                   |
| Leukemia      | Male   | 0-6 days    | 95+ years | 2 | 1  | Mean BMI                                               |
| Leukemia      | Male   | 0-6 days    | 95+ years | 1 | 1  | Log-transformed SEV scalar: Leukemia                   |
| Leukemia      | Male   | 0-6 days    | 95+ years | 1 | 1  | Log-transformed age-standardized SEV scalar: Leukemia  |
| Leukemia      | Male   | 0-6 days    | 95+ years | 3 | -1 | Socio-demographic Index                                |
| Leukemia      | Male   | 0-6 days    | 95+ years | 2 | -1 | Healthcare access and quality index                    |
| Leukemia      | Male   | 0-6 days    | 95+ years | 2 | 1  | Liters of alcohol consumed per capita                  |
| Leukemia      | Female | 0-6 days    | 95+ years | 2 | 1  | Tobacco (cigarettes per capita)                        |
| Leukemia      | Female | 0-6 days    | 95+ years | 2 | 1  | Cumulative cigarettes (10 years)                       |
| Leukemia      | Female | 0-6 days    | 95+ years | 2 | 1  | Cumulative cigarettes (20 years)                       |
| Leukemia      | Female | 0-6 days    | 95+ years | 3 | -1 | Education (years per capita)                           |
| Leukemia      | Female | 0-6 days    | 95+ years | 3 | 1  | LDI (I\$ per capita)                                   |
| Leukemia      | Female | 0-6 days    | 95+ years | 2 | 1  | Mean BMI                                               |
| Leukemia      | Female | 0-6 days    | 95+ years | 1 | 1  | Log-transformed SEV scalar: Leukemia                   |
| Leukemia      | Female | 0-6 days    | 95+ years | 1 | 1  | Log-transformed age-standardized SEV scalar: Leukemia  |

|                            |        |           |           |   |    |                                               |
|----------------------------|--------|-----------|-----------|---|----|-----------------------------------------------|
| Leukemia                   | Female | 0-6 days  | 95+ years | 3 | -1 | Socio-demographic Index                       |
| Leukemia                   | Female | 0-6 days  | 95+ years | 2 | -1 | Healthcare access and quality index           |
| Leukemia                   | Female | 0-6 days  | 95+ years | 2 | 1  | Liters of alcohol consumed per capita         |
| Lip and oral cavity cancer | Male   | 5-9 years | 95+ years | 1 | 1  | Tobacco (cigarettes per capita)               |
| Lip and oral cavity cancer | Male   | 5-9 years | 95+ years | 1 | 1  | Cumulative cigarettes (10 years)              |
| Lip and oral cavity cancer | Male   | 5-9 years | 95+ years | 1 | 1  | Cumulative cigarettes (20 years)              |
| Lip and oral cavity cancer | Male   | 5-9 years | 95+ years | 3 | -1 | Education (years per capita)                  |
| Lip and oral cavity cancer | Male   | 5-9 years | 95+ years | 3 | 1  | LDI (I\$ per capita)                          |
| Lip and oral cavity cancer | Male   | 5-9 years | 95+ years | 1 | 1  | Log-transformed SEV scalar: Lip oral C        |
| Lip and oral cavity cancer | Male   | 5-9 years | 95+ years | 3 | 1  | Socio-demographic Index                       |
| Lip and oral cavity cancer | Male   | 5-9 years | 95+ years | 2 | -1 | Healthcare access and quality index           |
| Lip and oral cavity cancer | Male   | 5-9 years | 95+ years | 2 | 1  | Age- and sex- specific SEV for low fruit      |
| Lip and oral cavity cancer | Male   | 5-9 years | 95+ years | 2 | 1  | Age- and sex- specific SEV for Low vegetables |
| Lip and oral cavity cancer | Male   | 5-9 years | 95+ years | 2 | 1  | Age- and sex- specific SEV for High red meat  |
| Lip and oral cavity cancer | Male   | 5-9 years | 95+ years | 1 | 1  | Liters of alcohol consumed per capita         |
| Lip and oral cavity cancer | Female | 5-9 years | 95+ years | 1 | 1  | Tobacco (cigarettes per capita)               |
| Lip and oral cavity cancer | Female | 5-9 years | 95+ years | 1 | 1  | Cumulative cigarettes (10 years)              |
| Lip and oral cavity cancer | Female | 5-9 years | 95+ years | 1 | 1  | Cumulative cigarettes (20 years)              |
| Lip and oral cavity cancer | Female | 5-9 years | 95+ years | 3 | -1 | Education (years per capita)                  |
| Lip and oral cavity cancer | Female | 5-9 years | 95+ years | 3 | 1  | LDI (I\$ per capita)                          |
| Lip and oral cavity cancer | Female | 5-9 years | 95+ years | 1 | 1  | Log-transformed SEV scalar: Lip oral C        |
| Lip and oral cavity cancer | Female | 5-9 years | 95+ years | 3 | 1  | Socio-demographic Index                       |
| Lip and oral cavity cancer | Female | 5-9 years | 95+ years | 2 | -1 | Healthcare access and quality index           |
| Lip and oral cavity cancer | Female | 5-9 years | 95+ years | 2 | 1  | Age- and sex- specific SEV for low fruit      |
| Lip and oral cavity cancer | Female | 5-9 years | 95+ years | 2 | 1  | Age- and sex- specific SEV for Low vegetables |
| Lip and oral cavity cancer | Female | 5-9 years | 95+ years | 2 | 1  | Age- and sex- specific SEV for High red meat  |
| Lip and oral cavity cancer | Female | 5-9 years | 95+ years | 1 | 1  | Liters of alcohol consumed per capita         |
| Liver cancer               | Male   | 0-6 days  | 95+ years | 2 | 1  | Tobacco (cigarettes per capita)               |
| Liver cancer               | Male   | 0-6 days  | 95+ years | 2 | 1  | Cumulative cigarettes (20 years)              |

|              |        |          |           |   |    |                                                                |
|--------------|--------|----------|-----------|---|----|----------------------------------------------------------------|
| Liver cancer | Male   | 0-6 days | 95+ years | 2 | 1  | Diabetes Fasting Plasma Glucose (mmol/L), age-standardized 25+ |
| Liver cancer | Male   | 0-6 days | 95+ years | 3 | -1 | Education (years per capita)                                   |
| Liver cancer | Male   | 0-6 days | 95+ years | 3 | -1 | LDI (I\$ per capita)                                           |
| Liver cancer | Male   | 0-6 days | 95+ years | 2 | 1  | Mean BMI                                                       |
| Liver cancer | Male   | 0-6 days | 95+ years | 1 | 1  | Log-transformed SEV scalar: Liver C                            |
| Liver cancer | Male   | 0-6 days | 95+ years | 3 | -1 | Socio-demographic Index                                        |
| Liver cancer | Male   | 0-6 days | 95+ years | 1 | 1  | HIV age-standardized prevalence                                |
| Liver cancer | Male   | 0-6 days | 95+ years | 2 | -1 | Healthcare access and quality index                            |
| Liver cancer | Male   | 0-6 days | 95+ years | 2 | -1 | Hepatitis B 3-dose coverage (proportion)                       |
| Liver cancer | Male   | 0-6 days | 95+ years | 2 | 1  | Intravenous drug use (age-standardized proportion)             |
| Liver cancer | Male   | 0-6 days | 95+ years | 2 | -1 | Hepatitis B vaccine coverage (proportion), aged through time   |
| Liver cancer | Male   | 0-6 days | 95+ years | 3 | 1  | Age- and sex-specific SEV for High red meat                    |
| Liver cancer | Male   | 0-6 days | 95+ years | 1 | 1  | Hepatitis B Seroprevalence (HBsAg) age standardized            |
| Liver cancer | Male   | 0-6 days | 95+ years | 1 | 1  | Hepatitis C Seroprevalence (anti-HCV) age standardized         |
| Liver cancer | Male   | 0-6 days | 95+ years | 1 | 1  | Liters of alcohol consumed per capita                          |
| Liver cancer | Female | 0-6 days | 95+ years | 2 | 1  | Tobacco (cigarettes per capita)                                |
| Liver cancer | Female | 0-6 days | 95+ years | 2 | 1  | Cumulative cigarettes (20 years)                               |
| Liver cancer | Female | 0-6 days | 95+ years | 2 | 1  | Diabetes Fasting Plasma Glucose (mmol/L), age-standardized 25+ |
| Liver cancer | Female | 0-6 days | 95+ years | 3 | -1 | Education (years per capita)                                   |
| Liver cancer | Female | 0-6 days | 95+ years | 3 | -1 | LDI (I\$ per capita)                                           |
| Liver cancer | Female | 0-6 days | 95+ years | 2 | 1  | Mean BMI                                                       |
| Liver cancer | Female | 0-6 days | 95+ years | 1 | 1  | Log-transformed SEV scalar: Liver C                            |
| Liver cancer | Female | 0-6 days | 95+ years | 3 | -1 | Socio-demographic Index                                        |
| Liver cancer | Female | 0-6 days | 95+ years | 1 | 1  | HIV age-standardized prevalence                                |
| Liver cancer | Female | 0-6 days | 95+ years | 2 | -1 | Healthcare access and quality index                            |
| Liver cancer | Female | 0-6 days | 95+ years | 2 | -1 | Hepatitis B 3-dose coverage (proportion)                       |
| Liver cancer | Female | 0-6 days | 95+ years | 2 | 1  | Intravenous drug use (age-standardized proportion)             |

|                         |        |             |           |   |    |                                                              |
|-------------------------|--------|-------------|-----------|---|----|--------------------------------------------------------------|
| Liver cancer            | Female | 0-6 days    | 95+ years | 2 | -1 | Hepatitis B vaccine coverage (proportion), aged through time |
| Liver cancer            | Female | 0-6 days    | 95+ years | 3 | 1  | Age- and sex-specific SEV for High red meat                  |
| Liver cancer            | Female | 0-6 days    | 95+ years | 1 | 1  | Hepatitis B Seroprevalence (HBsAg) age standardized          |
| Liver cancer            | Female | 0-6 days    | 95+ years | 1 | 1  | Hepatitis C Seroprevalence (anti-HCV) age standardized       |
| Liver cancer            | Female | 0-6 days    | 95+ years | 1 | 1  | Liters of alcohol consumed per capita                        |
| Malignant skin melanoma | Male   | 0-6 days    | 95+ years | 3 | -1 | Education (years per capita)                                 |
| Malignant skin melanoma | Male   | 0-6 days    | 95+ years | 3 | -1 | LDI (I\$ per capita)                                         |
| Malignant skin melanoma | Male   | 0-6 days    | 95+ years | 2 | -1 | Latitude Under 15 (proportion)                               |
| Malignant skin melanoma | Male   | 0-6 days    | 95+ years | 2 | -1 | Latitude 15 to 30 (proportion)                               |
| Malignant skin melanoma | Male   | 0-6 days    | 95+ years | 2 | -1 | Latitude 30 to 45 (proportion)                               |
| Malignant skin melanoma | Male   | 0-6 days    | 95+ years | 2 | -1 | Latitude Over 45 (proportion)                                |
| Malignant skin melanoma | Male   | 0-6 days    | 95+ years | 3 | 1  | Socio-demographic Index                                      |
| Malignant skin melanoma | Male   | 0-6 days    | 95+ years | 2 | -1 | Healthcare access and quality index                          |
| Malignant skin melanoma | Male   | 0-6 days    | 95+ years | 1 | 1  | Liters of alcohol consumed per capita                        |
| Malignant skin melanoma | Female | 0-6 days    | 95+ years | 3 | -1 | Education (years per capita)                                 |
| Malignant skin melanoma | Female | 0-6 days    | 95+ years | 3 | -1 | LDI (I\$ per capita)                                         |
| Malignant skin melanoma | Female | 0-6 days    | 95+ years | 2 | -1 | Latitude Under 15 (proportion)                               |
| Malignant skin melanoma | Female | 0-6 days    | 95+ years | 2 | -1 | Latitude 15 to 30 (proportion)                               |
| Malignant skin melanoma | Female | 0-6 days    | 95+ years | 2 | -1 | Latitude 30 to 45 (proportion)                               |
| Malignant skin melanoma | Female | 0-6 days    | 95+ years | 2 | -1 | Latitude Over 45 (proportion)                                |
| Malignant skin melanoma | Female | 0-6 days    | 95+ years | 3 | 1  | Socio-demographic Index                                      |
| Malignant skin melanoma | Female | 0-6 days    | 95+ years | 2 | -1 | Healthcare access and quality index                          |
| Malignant skin melanoma | Female | 0-6 days    | 95+ years | 1 | 1  | Liters of alcohol consumed per capita                        |
| Mesothelioma            | Male   | 20-24 years | 95+ years | 2 | 1  | Cumulative Cigarettes (5 Years)                              |
| Mesothelioma            | Male   | 20-24 years | 95+ years | 3 | -1 | Education (years per capita)                                 |
| Mesothelioma            | Male   | 20-24 years | 95+ years | 2 | 1  | Gold production (binary)                                     |
| Mesothelioma            | Male   | 20-24 years | 95+ years | 3 | -1 | LDI (I\$ per capita)                                         |
| Mesothelioma            | Male   | 20-24 years | 95+ years | 2 | 1  | Indoor Air Pollution (All Cooking Fuels)                     |
| Mesothelioma            | Male   | 20-24 years | 95+ years | 2 | 1  | Population Density (over 1000 ppl/sqkm, proportion)          |

|                  |        |             |           |   |    |                                                        |
|------------------|--------|-------------|-----------|---|----|--------------------------------------------------------|
| Mesothelioma     | Male   | 20-24 years | 95+ years | 1 | 1  | Smoking Prevalence                                     |
| Mesothelioma     | Male   | 20-24 years | 95+ years | 1 | 1  | Log-transformed SEV scalar: Mesothel                   |
| Mesothelioma     | Male   | 20-24 years | 95+ years | 1 | 1  | Log-transformed age-standardized SEV scalar: Mesothel  |
| Mesothelioma     | Male   | 20-24 years | 95+ years | 3 | 1  | Socio-demographic Index                                |
| Mesothelioma     | Male   | 20-24 years | 95+ years | 2 | -1 | Healthcare access and quality index                    |
| Mesothelioma     | Male   | 20-24 years | 95+ years | 1 | 1  | Asbestos consumption (metric tons per year per capita) |
| Mesothelioma     | Female | 20-24 years | 95+ years | 2 | 1  | Cumulative Cigarettes (5 Years)                        |
| Mesothelioma     | Female | 20-24 years | 95+ years | 3 | -1 | Education (years per capita)                           |
| Mesothelioma     | Female | 20-24 years | 95+ years | 2 | 1  | Gold production (binary)                               |
| Mesothelioma     | Female | 20-24 years | 95+ years | 3 | -1 | LDI (I\$ per capita)                                   |
| Mesothelioma     | Female | 20-24 years | 95+ years | 2 | 1  | Indoor Air Pollution (All Cooking Fuels)               |
| Mesothelioma     | Female | 20-24 years | 95+ years | 2 | 1  | Population Density (over 1000 ppl/sqkm, proportion)    |
| Mesothelioma     | Female | 20-24 years | 95+ years | 1 | 1  | Smoking Prevalence                                     |
| Mesothelioma     | Female | 20-24 years | 95+ years | 3 | 1  | Socio-demographic Index                                |
| Mesothelioma     | Female | 20-24 years | 95+ years | 2 | -1 | Healthcare access and quality index                    |
| Mesothelioma     | Female | 20-24 years | 95+ years | 1 | 1  | Asbestos consumption (metric tons per year per capita) |
| Multiple myeloma | Male   | 20-24 years | 95+ years | 1 | 1  | Tobacco (cigarettes per capita)                        |
| Multiple myeloma | Male   | 20-24 years | 95+ years | 3 | -1 | Education (years per capita)                           |
| Multiple myeloma | Male   | 20-24 years | 95+ years | 3 | 1  | LDI (I\$ per capita)                                   |
| Multiple myeloma | Male   | 20-24 years | 95+ years | 2 | 1  | Mean BMI                                               |
| Multiple myeloma | Male   | 20-24 years | 95+ years | 2 | -1 | Sanitation (proportion with access)                    |
| Multiple myeloma | Male   | 20-24 years | 95+ years | 1 | 1  | Smoking Prevalence                                     |
| Multiple myeloma | Male   | 20-24 years | 95+ years | 2 | -1 | Improved Water Source (proportion with access)         |
| Multiple myeloma | Male   | 20-24 years | 95+ years | 3 | 1  | Socio-demographic Index                                |
| Multiple myeloma | Male   | 20-24 years | 95+ years | 2 | -1 | Healthcare access and quality index                    |
| Multiple myeloma | Male   | 20-24 years | 95+ years | 2 | 1  | Age- and sex- specific SEV for low fruit               |
| Multiple myeloma | Male   | 20-24 years | 95+ years | 2 | 1  | Age- and sex- specific SEV for Low vegetables          |
| Multiple myeloma | Male   | 20-24 years | 95+ years | 2 | 1  | Age- and sex-specific SEV for High red meat            |
| Multiple myeloma | Male   | 20-24 years | 95+ years | 1 | 1  | Liters of alcohol consumed per capita                  |
| Multiple myeloma | Female | 20-24 years | 95+ years | 1 | 1  | Tobacco (cigarettes per capita)                        |

|                    |        |             |           |   |    |                                                     |
|--------------------|--------|-------------|-----------|---|----|-----------------------------------------------------|
| Multiple myeloma   | Female | 20-24 years | 95+ years | 3 | -1 | Education (years per capita)                        |
| Multiple myeloma   | Female | 20-24 years | 95+ years | 3 | 1  | LDI (I\$ per capita)                                |
| Multiple myeloma   | Female | 20-24 years | 95+ years | 2 | 1  | Mean BMI                                            |
| Multiple myeloma   | Female | 20-24 years | 95+ years | 2 | -1 | Sanitation (proportion with access)                 |
| Multiple myeloma   | Female | 20-24 years | 95+ years | 1 | 1  | Smoking Prevalence                                  |
| Multiple myeloma   | Female | 20-24 years | 95+ years | 2 | -1 | Improved Water Source (proportion with access)      |
| Multiple myeloma   | Female | 20-24 years | 95+ years | 3 | 1  | Socio-demographic Index                             |
| Multiple myeloma   | Female | 20-24 years | 95+ years | 2 | -1 | Healthcare access and quality index                 |
| Multiple myeloma   | Female | 20-24 years | 95+ years | 2 | 1  | Age- and sex- specific SEV for low fruit            |
| Multiple myeloma   | Female | 20-24 years | 95+ years | 2 | 1  | Age- and sex- specific SEV for Low vegetables       |
| Multiple myeloma   | Female | 20-24 years | 95+ years | 2 | 1  | Age- and sex-specific SEV for High red meat         |
| Multiple myeloma   | Female | 20-24 years | 95+ years | 1 | 1  | Liters of alcohol consumed per capita               |
| Nasopharynx cancer | Male   | 5-9 years   | 95+ years | 1 | 1  | Tobacco (cigarettes per capita)                     |
| Nasopharynx cancer | Male   | 5-9 years   | 95+ years | 1 | 1  | Cumulative cigarettes (10 years)                    |
| Nasopharynx cancer | Male   | 5-9 years   | 95+ years | 1 | 1  | Cumulative cigarettes (20 years)                    |
| Nasopharynx cancer | Male   | 5-9 years   | 95+ years | 3 | -1 | Education (years per capita)                        |
| Nasopharynx cancer | Male   | 5-9 years   | 95+ years | 3 | -1 | LDI (I\$ per capita)                                |
| Nasopharynx cancer | Male   | 5-9 years   | 95+ years | 2 | 1  | Population Density (over 1000 ppl/sqkm, proportion) |
| Nasopharynx cancer | Male   | 5-9 years   | 95+ years | 1 | 1  | Log-transformed SEV scalar: Nasoph C                |
| Nasopharynx cancer | Male   | 5-9 years   | 95+ years | 3 | 1  | Socio-demographic Index                             |
| Nasopharynx cancer | Male   | 5-9 years   | 95+ years | 2 | -1 | Healthcare access and quality index                 |
| Nasopharynx cancer | Male   | 5-9 years   | 95+ years | 3 | 1  | Age- and sex- specific SEV for low fruit            |
| Nasopharynx cancer | Male   | 5-9 years   | 95+ years | 2 | 1  | Age- and sex- specific SEV for Low vegetables       |
| Nasopharynx cancer | Male   | 5-9 years   | 95+ years | 1 | 1  | Liters of alcohol consumed per capita               |
| Nasopharynx cancer | Female | 5-9 years   | 95+ years | 1 | 1  | Tobacco (cigarettes per capita)                     |
| Nasopharynx cancer | Female | 5-9 years   | 95+ years | 1 | 1  | Cumulative cigarettes (10 years)                    |
| Nasopharynx cancer | Female | 5-9 years   | 95+ years | 1 | 1  | Cumulative cigarettes (20 years)                    |
| Nasopharynx cancer | Female | 5-9 years   | 95+ years | 3 | -1 | Education (years per capita)                        |
| Nasopharynx cancer | Female | 5-9 years   | 95+ years | 3 | -1 | LDI (I\$ per capita)                                |
| Nasopharynx cancer | Female | 5-9 years   | 95+ years | 2 | 1  | Population Density (over 1000 ppl/sqkm, proportion) |

|                          |        |             |           |   |    |                                               |
|--------------------------|--------|-------------|-----------|---|----|-----------------------------------------------|
| Nasopharynx cancer       | Female | 5-9 years   | 95+ years | 1 | 1  | Log-transformed SEV scalar: Nasoph C          |
| Nasopharynx cancer       | Female | 5-9 years   | 95+ years | 3 | 1  | Socio-demographic Index                       |
| Nasopharynx cancer       | Female | 5-9 years   | 95+ years | 2 | -1 | Healthcare access and quality index           |
| Nasopharynx cancer       | Female | 5-9 years   | 95+ years | 3 | 1  | Age- and sex- specific SEV for low fruit      |
| Nasopharynx cancer       | Female | 5-9 years   | 95+ years | 2 | 1  | Age- and sex- specific SEV for Low vegetables |
| Nasopharynx cancer       | Female | 5-9 years   | 95+ years | 1 | 1  | Liters of alcohol consumed per capita         |
| Non-Hodgkin lymphoma     | Male   | 1-4 years   | 95+ years | 2 | 1  | Cumulative cigarettes (10 years)              |
| Non-Hodgkin lymphoma     | Male   | 1-4 years   | 95+ years | 2 | 1  | Cumulative cigarettes (15 years)              |
| Non-Hodgkin lymphoma     | Male   | 1-4 years   | 95+ years | 2 | 1  | Cumulative cigarettes (20 years)              |
| Non-Hodgkin lymphoma     | Male   | 1-4 years   | 95+ years | 2 | 1  | Cumulative Cigarettes (5 Years)               |
| Non-Hodgkin lymphoma     | Male   | 1-4 years   | 95+ years | 3 | 1  | LDI (I\$ per capita)                          |
| Non-Hodgkin lymphoma     | Male   | 1-4 years   | 95+ years | 2 | 1  | Mean BMI                                      |
| Non-Hodgkin lymphoma     | Male   | 1-4 years   | 95+ years | 2 | 1  | Smoking Prevalence                            |
| Non-Hodgkin lymphoma     | Male   | 1-4 years   | 95+ years | 3 | 1  | Socio-demographic Index                       |
| Non-Hodgkin lymphoma     | Male   | 1-4 years   | 95+ years | 2 | -1 | Healthcare access and quality index           |
| Non-Hodgkin lymphoma     | Male   | 1-4 years   | 95+ years | 2 | 1  | Liters of alcohol consumed per capita         |
| Non-Hodgkin lymphoma     | Female | 1-4 years   | 95+ years | 2 | 1  | Cumulative cigarettes (10 years)              |
| Non-Hodgkin lymphoma     | Female | 1-4 years   | 95+ years | 2 | 1  | Cumulative cigarettes (15 years)              |
| Non-Hodgkin lymphoma     | Female | 1-4 years   | 95+ years | 2 | 1  | Cumulative cigarettes (20 years)              |
| Non-Hodgkin lymphoma     | Female | 1-4 years   | 95+ years | 2 | 1  | Cumulative Cigarettes (5 Years)               |
| Non-Hodgkin lymphoma     | Female | 1-4 years   | 95+ years | 3 | 1  | LDI (I\$ per capita)                          |
| Non-Hodgkin lymphoma     | Female | 1-4 years   | 95+ years | 2 | 1  | Mean BMI                                      |
| Non-Hodgkin lymphoma     | Female | 1-4 years   | 95+ years | 2 | 1  | Smoking Prevalence                            |
| Non-Hodgkin lymphoma     | Female | 1-4 years   | 95+ years | 3 | -1 | Total Fertility Rate                          |
| Non-Hodgkin lymphoma     | Female | 1-4 years   | 95+ years | 3 | 1  | Socio-demographic Index                       |
| Non-Hodgkin lymphoma     | Female | 1-4 years   | 95+ years | 2 | -1 | Healthcare access and quality index           |
| Non-Hodgkin lymphoma     | Female | 1-4 years   | 95+ years | 2 | 1  | Liters of alcohol consumed per capita         |
| Non-melanoma skin cancer | Male   | 20-24 years | 95+ years | 1 | 1  | Cumulative cigarettes (10 years)              |
| Non-melanoma skin cancer | Male   | 20-24 years | 95+ years | 1 | 1  | Cumulative cigarettes (15 years)              |
| Non-melanoma skin cancer | Male   | 20-24 years | 95+ years | 1 | 1  | Cumulative cigarettes (5 years)               |

|                          |        |             |           |   |    |                                                       |
|--------------------------|--------|-------------|-----------|---|----|-------------------------------------------------------|
| Non-melanoma skin cancer | Male   | 20-24 years | 95+ years | 3 | -1 | Education (years per capita)                          |
| Non-melanoma skin cancer | Male   | 20-24 years | 95+ years | 2 | -1 | Average latitude                                      |
| Non-melanoma skin cancer | Male   | 20-24 years | 95+ years | 3 | -1 | LDI (I\$ per capita)                                  |
| Non-melanoma skin cancer | Male   | 20-24 years | 95+ years | 1 | 1  | Smoking Prevalence                                    |
| Non-melanoma skin cancer | Male   | 20-24 years | 95+ years | 3 | 1  | Socio-demographic Index                               |
| Non-melanoma skin cancer | Male   | 20-24 years | 95+ years | 2 | -1 | Healthcare access and quality index                   |
| Non-melanoma skin cancer | Female | 20-24 years | 95+ years | 1 | 1  | Cumulative cigarettes (10 years)                      |
| Non-melanoma skin cancer | Female | 20-24 years | 95+ years | 1 | 1  | Cumulative cigarettes (15 years)                      |
| Non-melanoma skin cancer | Female | 20-24 years | 95+ years | 1 | 1  | Cumulative cigarettes (5 years)                       |
| Non-melanoma skin cancer | Female | 20-24 years | 95+ years | 3 | -1 | Education (years per capita)                          |
| Non-melanoma skin cancer | Female | 20-24 years | 95+ years | 2 | -1 | Average latitude                                      |
| Non-melanoma skin cancer | Female | 20-24 years | 95+ years | 3 | -1 | LDI (I\$ per capita)                                  |
| Non-melanoma skin cancer | Female | 20-24 years | 95+ years | 1 | 1  | Smoking Prevalence                                    |
| Non-melanoma skin cancer | Female | 20-24 years | 95+ years | 3 | 1  | Socio-demographic index                               |
| Non-melanoma skin cancer | Female | 20-24 years | 95+ years | 2 | -1 | Healthcare access and quality index                   |
| Other leukemia           | Male   | 0-6 days    | 95+ years | 2 | 1  | Tobacco (cigarettes per capita)                       |
| Other leukemia           | Male   | 0-6 days    | 95+ years | 2 | 1  | Cumulative cigarettes (10 years)                      |
| Other leukemia           | Male   | 0-6 days    | 95+ years | 2 | 1  | Cumulative cigarettes (20 years)                      |
| Other leukemia           | Male   | 0-6 days    | 95+ years | 3 | -1 | Education (years per capita)                          |
| Other leukemia           | Male   | 0-6 days    | 95+ years | 3 | 1  | LDI (I\$ per capita)                                  |
| Other leukemia           | Male   | 0-6 days    | 95+ years | 2 | 1  | Mean BMI                                              |
| Other leukemia           | Male   | 0-6 days    | 95+ years | 1 | 1  | Log-transformed SEV scalar: Leukemia                  |
| Other leukemia           | Male   | 0-6 days    | 95+ years | 1 | 1  | Log-transformed age-standardized SEV scalar: Leukemia |
| Other leukemia           | Male   | 0-6 days    | 95+ years | 3 | -1 | Socio-demographic Index                               |
| Other leukemia           | Male   | 0-6 days    | 95+ years | 2 | -1 | Healthcare access and quality index                   |
| Other leukemia           | Male   | 0-6 days    | 95+ years | 2 | 1  | Liters of alcohol consumed per capita                 |
| Other leukemia           | Female | 0-6 days    | 95+ years | 2 | 1  | Tobacco (cigarettes per capita)                       |
| Other leukemia           | Female | 0-6 days    | 95+ years | 2 | 1  | Cumulative cigarettes (10 years)                      |
| Other leukemia           | Female | 0-6 days    | 95+ years | 2 | 1  | Cumulative cigarettes (20 years)                      |
| Other leukemia           | Female | 0-6 days    | 95+ years | 3 | -1 | Education (years per capita)                          |



|                           |        |             |           |   |    |                                                       |
|---------------------------|--------|-------------|-----------|---|----|-------------------------------------------------------|
| Other leukemia            | Female | 0-6 days    | 95+ years | 3 | 1  | LDI (I\$ per capita)                                  |
| Other leukemia            | Female | 0-6 days    | 95+ years | 2 | 1  | Mean BMI                                              |
| Other leukemia            | Female | 0-6 days    | 95+ years | 1 | 1  | Log-transformed SEV scalar: Leukemia                  |
| Other leukemia            | Female | 0-6 days    | 95+ years | 1 | 1  | Log-transformed age-standardized SEV scalar: Leukemia |
| Other leukemia            | Female | 0-6 days    | 95+ years | 3 | -1 | Socio-demographic Index                               |
| Other leukemia            | Female | 0-6 days    | 95+ years | 2 | -1 | Healthcare access and quality index                   |
| Other leukemia (dr)       | Female | 0-6 days    | 95+ years | 1 | 1  | Liters of alcohol consumed per capita                 |
| Other leukemia (glb)      | Female | 0-6 days    | 95+ years | 2 | 1  | Liters of alcohol consumed per capita                 |
| Other malignant neoplasms | Male   | 0-6 days    | 95+ years | 1 | 1  | Tobacco (cigarettes per capita)                       |
| Other malignant neoplasms | Male   | 0-6 days    | 95+ years | 3 | -1 | Education (years per capita)                          |
| Other malignant neoplasms | Male   | 0-6 days    | 95+ years | 3 | 1  | LDI (I\$ per capita)                                  |
| Other malignant neoplasms | Male   | 0-6 days    | 95+ years | 1 | 1  | Smoking Prevalence                                    |
| Other malignant neoplasms | Male   | 0-6 days    | 95+ years | 3 | 1  | Socio-demographic Index                               |
| Other malignant neoplasms | Male   | 0-6 days    | 95+ years | 2 | -1 | PUFA adjusted(percent)                                |
| Other malignant neoplasms | Male   | 0-6 days    | 95+ years | 2 | -1 | Healthcare access and quality index                   |
| Other malignant neoplasms | Male   | 0-6 days    | 95+ years | 2 | 1  | Age- and sex- specific SEV for low fruit              |
| Other malignant neoplasms | Male   | 0-6 days    | 95+ years | 2 | 1  | Age- and sex- specific SEV for Low vegetables         |
| Other malignant neoplasms | Male   | 0-6 days    | 95+ years | 2 | 1  | Age- and sex-specific SEV for Low nuts and seeds      |
| Other malignant neoplasms | Female | 0-6 days    | 95+ years | 1 | 1  | Tobacco (cigarettes per capita)                       |
| Other malignant neoplasms | Female | 0-6 days    | 95+ years | 3 | -1 | Education (years per capita)                          |
| Other malignant neoplasms | Female | 0-6 days    | 95+ years | 3 | 1  | LDI (I\$ per capita)                                  |
| Other malignant neoplasms | Female | 0-6 days    | 95+ years | 1 | 1  | Smoking Prevalence                                    |
| Other malignant neoplasms | Female | 0-6 days    | 95+ years | 3 | 1  | Socio-demographic Index                               |
| Other malignant neoplasms | Female | 0-6 days    | 95+ years | 2 | -1 | PUFA adjusted(percent)                                |
| Other malignant neoplasms | Female | 0-6 days    | 95+ years | 2 | -1 | Healthcare access and quality index                   |
| Other malignant neoplasms | Female | 0-6 days    | 95+ years | 2 | 1  | Age- and sex- specific SEV for low fruit              |
| Other malignant neoplasms | Female | 0-6 days    | 95+ years | 2 | 1  | Age- and sex- specific SEV for Low vegetables         |
| Other malignant neoplasms | Female | 0-6 days    | 95+ years | 2 | 1  | Age- and sex-specific SEV for Low nuts and seeds      |
| Other pharynx cancer      | Male   | 20-24 years | 95+ years | 2 | 1  | Cumulative cigarettes (5 years)                       |
| Other pharynx cancer      | Male   | 20-24 years | 95+ years | 3 | -1 | Education (years per capita)                          |

|                      |        |             |           |   |    |                                                     |
|----------------------|--------|-------------|-----------|---|----|-----------------------------------------------------|
| Other pharynx cancer | Male   | 20-24 years | 95+ years | 3 | 1  | LDI (I\$ per capita)                                |
| Other pharynx cancer | Male   | 20-24 years | 95+ years | 2 | 1  | Population Density (over 1000 ppl/sqkm, proportion) |
| Other pharynx cancer | Male   | 20-24 years | 95+ years | 2 | 1  | Population Density (under 150 ppl/sqkm, proportion) |
| Other pharynx cancer | Male   | 20-24 years | 95+ years | 1 | 1  | Smoking Prevalence                                  |
| Other pharynx cancer | Male   | 20-24 years | 95+ years | 1 | 1  | Log-transformed SEV scalar: Oth Phar C              |
| Other pharynx cancer | Male   | 20-24 years | 95+ years | 3 | 1  | Socio-demographic Index                             |
| Other pharynx cancer | Male   | 20-24 years | 95+ years | 2 | -1 | Healthcare access and quality index                 |
| Other pharynx cancer | Male   | 20-24 years | 95+ years | 2 | 1  | Age- and sex- specific SEV for low fruit            |
| Other pharynx cancer | Male   | 20-24 years | 95+ years | 2 | 1  | Age- and sex- specific SEV for Low vegetables       |
| Other pharynx cancer | Male   | 20-24 years | 95+ years | 1 | 1  | Liters of alcohol consumed per capita               |
| Other pharynx cancer | Female | 20-24 years | 95+ years | 2 | 1  | Cumulative cigarettes (5 years)                     |
| Other pharynx cancer | Female | 20-24 years | 95+ years | 3 | -1 | Education (years per capita)                        |
| Other pharynx cancer | Female | 20-24 years | 95+ years | 3 | 1  | LDI (I\$ per capita)                                |
| Other pharynx cancer | Female | 20-24 years | 95+ years | 2 | 1  | Population Density (over 1000 ppl/sqkm, proportion) |
| Other pharynx cancer | Female | 20-24 years | 95+ years | 2 | 1  | Population Density (under 150 ppl/sqkm, proportion) |
| Other pharynx cancer | Female | 20-24 years | 95+ years | 1 | 1  | Smoking Prevalence                                  |
| Other pharynx cancer | Female | 20-24 years | 95+ years | 1 | 1  | Log-transformed SEV scalar: Oth Phar C              |
| Other pharynx cancer | Female | 20-24 years | 95+ years | 3 | 1  | Socio-demographic Index                             |
| Other pharynx cancer | Female | 20-24 years | 95+ years | 2 | -1 | Healthcare access and quality index                 |
| Other pharynx cancer | Female | 20-24 years | 95+ years | 2 | 1  | Age- and sex- specific SEV for low fruit            |
| Other pharynx cancer | Female | 20-24 years | 95+ years | 2 | 1  | Age- and sex- specific SEV for Low vegetables       |
| Other pharynx cancer | Female | 20-24 years | 95+ years | 1 | 1  | Liters of alcohol consumed per capita               |
| Ovarian cancer       | Female | 5-9 years   | 95+ years | 2 | -1 | Contraception (Modern) Prevalence (proportion)      |
| Ovarian cancer       | Female | 5-9 years   | 95+ years | 2 | 1  | Cumulative cigarettes (10 years)                    |
| Ovarian cancer       | Female | 5-9 years   | 95+ years | 2 | 1  | Cumulative cigarettes (20 years)                    |
| Ovarian cancer       | Female | 5-9 years   | 95+ years | 2 | 1  | Diabetes Age-Standardized Prevalence (proportion)   |
| Ovarian cancer       | Female | 5-9 years   | 95+ years | 3 | -1 | Education (years per capita)                        |
| Ovarian cancer       | Female | 5-9 years   | 95+ years | 3 | -1 | LDI (I\$ per capita)                                |
| Ovarian cancer       | Female | 5-9 years   | 95+ years | 2 | 1  | Mean BMI                                            |
| Ovarian cancer       | Female | 5-9 years   | 95+ years | 2 | 1  | Smoking Prevalence                                  |

|                   |        |             |           |   |    |                                                                |
|-------------------|--------|-------------|-----------|---|----|----------------------------------------------------------------|
| Ovarian cancer    | Female | 5-9 years   | 95+ years | 2 | -1 | Total Fertility Rate                                           |
| Ovarian cancer    | Female | 5-9 years   | 95+ years | 1 | 1  | Log-transformed SEV scalar: Ovary C                            |
| Ovarian cancer    | Female | 5-9 years   | 95+ years | 3 | 1  | Socio-demographic Index                                        |
| Ovarian cancer    | Female | 5-9 years   | 95+ years | 2 | 1  | energy unadjusted(kcal)                                        |
| Ovarian cancer    | Female | 5-9 years   | 95+ years | 2 | -1 | Healthcare access and quality index                            |
| Ovarian cancer    | Female | 5-9 years   | 95+ years | 2 | 1  | Asbestos consumption (metric tons per year per capita)         |
| Ovarian cancer    | Female | 5-9 years   | 95+ years | 3 | 1  | Age- and sex- specific SEV for low fruit                       |
| Ovarian cancer    | Female | 5-9 years   | 95+ years | 3 | 1  | Age- and sex- specific SEV for Low vegetables                  |
| Ovarian cancer    | Female | 5-9 years   | 95+ years | 1 | 1  | Liters of alcohol consumed per capita                          |
| Pancreatic cancer | Male   | 15-19 years | 95+ years | 1 | 1  | Tobacco (cigarettes per capita)                                |
| Pancreatic cancer | Male   | 15-19 years | 95+ years | 1 | 1  | Cumulative cigarettes (10 years)                               |
| Pancreatic cancer | Male   | 15-19 years | 95+ years | 1 | 1  | Cumulative cigarettes (20 years)                               |
| Pancreatic cancer | Male   | 15-19 years | 95+ years | 2 | 1  | Diabetes Fasting Plasma Glucose (mmol/L), age-standardized 25+ |
| Pancreatic cancer | Male   | 15-19 years | 95+ years | 2 | 1  | Diabetes Age-Standardized Prevalence (proportion)              |
| Pancreatic cancer | Male   | 15-19 years | 95+ years | 3 | -1 | Education (years per capita)                                   |
| Pancreatic cancer | Male   | 15-19 years | 95+ years | 3 | 1  | LDI (I\$ per capita)                                           |
| Pancreatic cancer | Male   | 15-19 years | 95+ years | 1 | 1  | Mean BMI                                                       |
| Pancreatic cancer | Male   | 15-19 years | 95+ years | 1 | 1  | Log-transformed SEV scalar: Pancreas C                         |
| Pancreatic cancer | Male   | 15-19 years | 95+ years | 3 | 1  | Socio-demographic Index                                        |
| Pancreatic cancer | Male   | 15-19 years | 95+ years | 2 | 1  | energy unadjusted(kcal)                                        |
| Pancreatic cancer | Male   | 15-19 years | 95+ years | 2 | -1 | Healthcare access and quality index                            |
| Pancreatic cancer | Male   | 15-19 years | 95+ years | 3 | 1  | Age- and sex- specific SEV for low fruit                       |
| Pancreatic cancer | Male   | 15-19 years | 95+ years | 3 | 1  | Age- and sex- specific SEV for Low vegetables                  |
| Pancreatic cancer | Male   | 15-19 years | 95+ years | 2 | 1  | Age- and sex-specific SEV for High red meat                    |
| Pancreatic cancer | Male   | 15-19 years | 95+ years | 2 | 1  | Liters of alcohol consumed per capita                          |
| Pancreatic cancer | Female | 15-19 years | 95+ years | 1 | 1  | Tobacco (cigarettes per capita)                                |
| Pancreatic cancer | Female | 15-19 years | 95+ years | 1 | 1  | Cumulative cigarettes (10 years)                               |
| Pancreatic cancer | Female | 15-19 years | 95+ years | 1 | 1  | Cumulative cigarettes (20 years)                               |

|                   |        |             |           |   |    |                                                                |
|-------------------|--------|-------------|-----------|---|----|----------------------------------------------------------------|
| Pancreatic cancer | Female | 15-19 years | 95+ years | 2 | 1  | Diabetes Fasting Plasma Glucose (mmol/L), age-standardized 25+ |
| Pancreatic cancer | Female | 15-19 years | 95+ years | 2 | 1  | Diabetes Age-Standardized Prevalence (proportion)              |
| Pancreatic cancer | Female | 15-19 years | 95+ years | 3 | -1 | Education (years per capita)                                   |
| Pancreatic cancer | Female | 15-19 years | 95+ years | 3 | 1  | LDI (I\$ per capita)                                           |
| Pancreatic cancer | Female | 15-19 years | 95+ years | 1 | 1  | Mean BMI                                                       |
| Pancreatic cancer | Female | 15-19 years | 95+ years | 1 | 1  | Log-transformed SEV scalar: Pancreas C                         |
| Pancreatic cancer | Female | 15-19 years | 95+ years | 3 | 1  | Socio-demographic Index                                        |
| Pancreatic cancer | Female | 15-19 years | 95+ years | 2 | 1  | energy unadjusted(kcal)                                        |
| Pancreatic cancer | Female | 15-19 years | 95+ years | 2 | -1 | Healthcare access and quality index                            |
| Pancreatic cancer | Female | 15-19 years | 95+ years | 3 | 1  | Age- and sex- specific SEV for low fruit                       |
| Pancreatic cancer | Female | 15-19 years | 95+ years | 3 | 1  | Age- and sex- specific SEV for Low vegetables                  |
| Pancreatic cancer | Female | 15-19 years | 95+ years | 2 | 1  | Age- and sex-specific SEV for High red meat                    |
| Pancreatic cancer | Female | 15-19 years | 95+ years | 2 | 1  | Liters of alcohol consumed per capita                          |
| Prostate cancer   | Male   | 20-24 years | 95+ years | 3 | -1 | Education (years per capita)                                   |
| Prostate cancer   | Male   | 20-24 years | 95+ years | 3 | -1 | LDI (I\$ per capita)                                           |
| Prostate cancer   | Male   | 20-24 years | 95+ years | 2 | 1  | Smoking Prevalence                                             |
| Prostate cancer   | Male   | 20-24 years | 95+ years | 1 | 1  | Log-transformed SEV scalar: Prostate C                         |
| Prostate cancer   | Male   | 20-24 years | 95+ years | 3 | 1  | Socio-demographic Index                                        |
| Prostate cancer   | Male   | 20-24 years | 95+ years | 2 | -1 | Healthcare access and quality index                            |
| Stomach cancer    | Male   | 15-19 years | 95+ years | 1 | 1  | Tobacco (cigarettes per capita)                                |
| Stomach cancer    | Male   | 15-19 years | 95+ years | 2 | 1  | Cumulative cigarettes (20 years)                               |
| Stomach cancer    | Male   | 15-19 years | 95+ years | 3 | -1 | Education (years per capita)                                   |
| Stomach cancer    | Male   | 15-19 years | 95+ years | 3 | 1  | LDI (I\$ per capita)                                           |
| Stomach cancer    | Male   | 15-19 years | 95+ years | 2 | 1  | Mean BMI                                                       |
| Stomach cancer    | Male   | 15-19 years | 95+ years | 2 | -1 | Sanitation (proportion with access)                            |
| Stomach cancer    | Male   | 15-19 years | 95+ years | 2 | -1 | Improved Water Source (proportion with access)                 |
| Stomach cancer    | Male   | 15-19 years | 95+ years | 1 | 1  | Log-transformed SEV scalar: Stomach C                          |
| Stomach cancer    | Male   | 15-19 years | 95+ years | 2 | 1  | Age- and sex-specific SEV for Unsafe water                     |
| Stomach cancer    | Male   | 15-19 years | 95+ years | 2 | 1  | Age- and sex-specific SEV for Unsafe sanitation                |

|                   |        |             |           |   |    |                                                 |
|-------------------|--------|-------------|-----------|---|----|-------------------------------------------------|
| Stomach cancer    | Male   | 15-19 years | 95+ years | 3 | -1 | Socio-demographic Index                         |
| Stomach cancer    | Male   | 15-19 years | 95+ years | 2 | -1 | Healthcare access and quality index             |
| Stomach cancer    | Male   | 15-19 years | 95+ years | 1 | 1  | Diet high in sodium                             |
| Stomach cancer    | Male   | 15-19 years | 95+ years | 3 | 1  | Age- and sex- specific SEV for low fruit        |
| Stomach cancer    | Male   | 15-19 years | 95+ years | 3 | 1  | Age- and sex- specific SEV for Low vegetables   |
| Stomach cancer    | Female | 15-19 years | 95+ years | 1 | 1  | Tobacco (cigarettes per capita)                 |
| Stomach cancer    | Female | 15-19 years | 95+ years | 2 | 1  | Cumulative cigarettes (20 years)                |
| Stomach cancer    | Female | 15-19 years | 95+ years | 3 | -1 | Education (years per capita)                    |
| Stomach cancer    | Female | 15-19 years | 95+ years | 3 | 1  | LDI (I\$ per capita)                            |
| Stomach cancer    | Female | 15-19 years | 95+ years | 2 | 1  | Mean BMI                                        |
| Stomach cancer    | Female | 15-19 years | 95+ years | 2 | -1 | Sanitation (proportion with access)             |
| Stomach cancer    | Female | 15-19 years | 95+ years | 2 | -1 | Improved Water Source (proportion with access)  |
| Stomach cancer    | Female | 15-19 years | 95+ years | 1 | 1  | Log-transformed SEV scalar: Stomach C           |
| Stomach cancer    | Female | 15-19 years | 95+ years | 2 | 1  | Age- and sex-specific SEV for Unsafe water      |
| Stomach cancer    | Female | 15-19 years | 95+ years | 2 | 1  | Age- and sex-specific SEV for Unsafe sanitation |
| Stomach cancer    | Female | 15-19 years | 95+ years | 3 | -1 | Socio-demographic Index                         |
| Stomach cancer    | Female | 15-19 years | 95+ years | 2 | -1 | Healthcare access and quality index             |
| Stomach cancer    | Female | 15-19 years | 95+ years | 1 | 1  | Diet high in sodium                             |
| Stomach cancer    | Female | 15-19 years | 95+ years | 3 | 1  | Age- and sex- specific SEV for low fruit        |
| Stomach cancer    | Female | 15-19 years | 95+ years | 3 | 1  | Age- and sex- specific SEV for Low vegetables   |
| Testicular cancer | Male   | 0-6 days    | 95+ years | 2 | 1  | Tobacco (cigarettes per capita)                 |
| Testicular cancer | Male   | 0-6 days    | 95+ years | 2 | 1  | Cumulative cigarettes (10 years)                |
| Testicular cancer | Male   | 0-6 days    | 95+ years | 2 | 1  | Cumulative Cigarettes (15 Years)                |
| Testicular cancer | Male   | 0-6 days    | 95+ years | 2 | 1  | Cumulative cigarettes (20 years)                |
| Testicular cancer | Male   | 0-6 days    | 95+ years | 2 | 1  | Cumulative Cigarettes (5 Years)                 |
| Testicular cancer | Male   | 0-6 days    | 95+ years | 3 | -1 | Education (years per capita)                    |
| Testicular cancer | Male   | 0-6 days    | 95+ years | 3 | 1  | LDI (I\$ per capita)                            |
| Testicular cancer | Male   | 0-6 days    | 95+ years | 2 | 1  | Smoking Prevalence                              |
| Testicular cancer | Male   | 0-6 days    | 95+ years | 3 | 1  | Socio-demographic Index                         |
| Testicular cancer | Male   | 0-6 days    | 95+ years | 2 | -1 | Healthcare access and quality index             |

|                                     |        |            |           |   |    |                                                |
|-------------------------------------|--------|------------|-----------|---|----|------------------------------------------------|
| Testicular cancer                   | Male   | 0-6 days   | 95+ years | 2 | 1  | Age- and sex- specific SEV for low fruit       |
| Testicular cancer                   | Male   | 0-6 days   | 95+ years | 2 | 1  | Age- and sex- specific SEV for Low vegetables  |
| Thyroid cancer                      | Male   | 5-9 years  | 95+ years | 2 | 1  | Tobacco (cigarettes per capita)                |
| Thyroid cancer                      | Male   | 5-9 years  | 95+ years | 3 | -1 | Education (years per capita)                   |
| Thyroid cancer                      | Male   | 5-9 years  | 95+ years | 3 | 1  | LDI (I\$ per capita)                           |
| Thyroid cancer                      | Male   | 5-9 years  | 95+ years | 2 | 1  | Mean BMI                                       |
| Thyroid cancer                      | Male   | 5-9 years  | 95+ years | 3 | -1 | Sanitation (proportion with access)            |
| Thyroid cancer                      | Male   | 5-9 years  | 95+ years | 3 | -1 | Improved Water Source (proportion with access) |
| Thyroid cancer                      | Male   | 5-9 years  | 95+ years | 1 | 1  | Log-transformed SEV scalar: Thyroid C          |
| Thyroid cancer                      | Male   | 5-9 years  | 95+ years | 3 | 1  | Socio-demographic Index                        |
| Thyroid cancer                      | Male   | 5-9 years  | 95+ years | 2 | -1 | Healthcare access and quality index            |
| Thyroid cancer                      | Male   | 5-9 years  | 95+ years | 3 | 1  | Age- and sex- specific SEV for low fruit       |
| Thyroid cancer                      | Male   | 5-9 years  | 95+ years | 2 | 1  | Age- and sex- specific SEV for Low vegetables  |
| Thyroid cancer                      | Male   | 5-9 years  | 95+ years | 2 | 1  | Age- and sex-specific SEV for High red meat    |
| Thyroid cancer                      | Male   | 5-9 years  | 95+ years | 1 | 1  | Liters of alcohol consumed per capita          |
| Thyroid cancer                      | Female | 5-9 years  | 95+ years | 2 | 1  | Tobacco (cigarettes per capita)                |
| Thyroid cancer                      | Female | 5-9 years  | 95+ years | 3 | -1 | Education (years per capita)                   |
| Thyroid cancer                      | Female | 5-9 years  | 95+ years | 3 | 1  | LDI (I\$ per capita)                           |
| Thyroid cancer                      | Female | 5-9 years  | 95+ years | 2 | 1  | Mean BMI                                       |
| Thyroid cancer                      | Female | 5-9 years  | 95+ years | 3 | -1 | Sanitation (proportion with access)            |
| Thyroid cancer                      | Female | 5-9 years  | 95+ years | 3 | -1 | Improved Water Source (proportion with access) |
| Thyroid cancer                      | Female | 5-9 years  | 95+ years | 1 | 1  | Log-transformed SEV scalar: Thyroid C          |
| Thyroid cancer                      | Female | 5-9 years  | 95+ years | 3 | 1  | Socio-demographic Index                        |
| Thyroid cancer                      | Female | 5-9 years  | 95+ years | 2 | -1 | Healthcare access and quality index            |
| Thyroid cancer                      | Female | 5-9 years  | 95+ years | 3 | 1  | Age- and sex- specific SEV for low fruit       |
| Thyroid cancer                      | Female | 5-9 years  | 95+ years | 2 | 1  | Age- and sex- specific SEV for Low vegetables  |
| Thyroid cancer                      | Female | 5-9 years  | 95+ years | 2 | 1  | Age- and sex-specific SEV for High red meat    |
| Thyroid cancer                      | Female | 5-9 years  | 95+ years | 1 | 1  | Liters of alcohol consumed per capita          |
| Tracheal, bronchus, and lung cancer | Male   | 10-14 year | 95+ years | 2 | 1  | Cumulative cigarettes (10 years)               |
| Tracheal, bronchus, and lung cancer | Male   | 10-14 year | 95+ years | 2 | 1  | Cumulative cigarettes (20 years)               |

|                                     |        |            |           |   |    |                                                                |
|-------------------------------------|--------|------------|-----------|---|----|----------------------------------------------------------------|
| Tracheal, bronchus, and lung cancer | Male   | 10-14 year | 95+ years | 2 | 1  | Diabetes Fasting Plasma Glucose (mmol/L), age-standardized 25+ |
| Tracheal, bronchus, and lung cancer | Male   | 10-14 year | 95+ years | 3 | -1 | Education (years per capita)                                   |
| Tracheal, bronchus, and lung cancer | Male   | 10-14 year | 95+ years | 3 | 1  | LDI (I\$ per capita)                                           |
| Tracheal, bronchus, and lung cancer | Male   | 10-14 year | 95+ years | 2 | 1  | Indoor Air Pollution (All Cooking Fuels)                       |
| Tracheal, bronchus, and lung cancer | Male   | 10-14 year | 95+ years | 2 | 1  | Outdoor Air Pollution (PM2.5)                                  |
| Tracheal, bronchus, and lung cancer | Male   | 10-14 year | 95+ years | 1 | 1  | Smoking Prevalence                                             |
| Tracheal, bronchus, and lung cancer | Male   | 10-14 year | 95+ years | 1 | 1  | Log-transformed SEV scalar: Lung C                             |
| Tracheal, bronchus, and lung cancer | Male   | 10-14 year | 95+ years | 1 | 1  | Log-transformed age-standardized SEV scalar: Lung C            |
| Tracheal, bronchus, and lung cancer | Male   | 10-14 year | 95+ years | 3 | 1  | Socio-demographic Index                                        |
| Tracheal, bronchus, and lung cancer | Male   | 10-14 year | 95+ years | 2 | -1 | Healthcare access and quality index                            |
| Tracheal, bronchus, and lung cancer | Male   | 10-14 year | 95+ years | 2 | 1  | Residential radon                                              |
| Tracheal, bronchus, and lung cancer | Male   | 10-14 year | 95+ years | 2 | 1  | Secondhand smoke                                               |
| Tracheal, bronchus, and lung cancer | Male   | 10-14 year | 95+ years | 1 | 1  | Asbestos consumption (metric tons per year per capita)         |
| Tracheal, bronchus, and lung cancer | Female | 10-14 year | 95+ years | 2 | 1  | Cumulative cigarettes (10 years)                               |
| Tracheal, bronchus, and lung cancer | Female | 10-14 year | 95+ years | 2 | 1  | Cumulative cigarettes (20 years)                               |
| Tracheal, bronchus, and lung cancer | Female | 10-14 year | 95+ years | 2 | 1  | Diabetes Fasting Plasma Glucose (mmol/L), age-standardized 25+ |
| Tracheal, bronchus, and lung cancer | Female | 10-14 year | 95+ years | 3 | -1 | Education (years per capita)                                   |
| Tracheal, bronchus, and lung cancer | Female | 10-14 year | 95+ years | 3 | 1  | LDI (I\$ per capita)                                           |
| Tracheal, bronchus, and lung cancer | Female | 10-14 year | 95+ years | 2 | 1  | Indoor Air Pollution (All Cooking Fuels)                       |
| Tracheal, bronchus, and lung cancer | Female | 10-14 year | 95+ years | 2 | 1  | Outdoor Air Pollution (PM2.5)                                  |
| Tracheal, bronchus, and lung cancer | Female | 10-14 year | 95+ years | 1 | 1  | Smoking Prevalence                                             |
| Tracheal, bronchus, and lung cancer | Female | 10-14 year | 95+ years | 1 | 1  | Log-transformed SEV scalar: Lung C                             |
| Tracheal, bronchus, and lung cancer | Female | 10-14 year | 95+ years | 1 | 1  | Log-transformed age-standardized SEV scalar: Lung C            |
| Tracheal, bronchus, and lung cancer | Female | 10-14 year | 95+ years | 3 | 1  | Socio-demographic Index                                        |
| Tracheal, bronchus, and lung cancer | Female | 10-14 year | 95+ years | 2 | -1 | Healthcare access and quality index                            |
| Tracheal, bronchus, and lung cancer | Female | 10-14 year | 95+ years | 2 | 1  | Residential radon                                              |
| Tracheal, bronchus, and lung cancer | Female | 10-14 year | 95+ years | 2 | 1  | Secondhand smoke                                               |
| Tracheal, bronchus, and lung cancer | Female | 10-14 year | 95+ years | 1 | 1  | Asbestos consumption (metric tons per year per capita)         |

|                |        |             |           |   |    |                                                   |
|----------------|--------|-------------|-----------|---|----|---------------------------------------------------|
| Uterine cancer | Female | 20-24 years | 95+ years | 2 | 1  | Tobacco (cigarettes per capita)                   |
| Uterine cancer | Female | 20-24 years | 95+ years | 2 | 1  | Cumulative cigarettes (10 years)                  |
| Uterine cancer | Female | 20-24 years | 95+ years | 2 | 1  | Cumulative Cigarettes (5 Years)                   |
| Uterine cancer | Female | 20-24 years | 95+ years | 2 | 1  | Diabetes Age-Standardized Prevalence (proportion) |
| Uterine cancer | Female | 20-24 years | 95+ years | 3 | -1 | Education (years per capita)                      |
| Uterine cancer | Female | 20-24 years | 95+ years | 3 | 1  | LDI (I\$ per capita)                              |
| Uterine cancer | Female | 20-24 years | 95+ years | 1 | 1  | Mean BMI                                          |
| Uterine cancer | Female | 20-24 years | 95+ years | 2 | 1  | Smoking Prevalence                                |
| Uterine cancer | Female | 20-24 years | 95+ years | 2 | -1 | Total Fertility Rate                              |
| Uterine cancer | Female | 20-24 years | 95+ years | 1 | 1  | Log-transformed SEV scalar: Uterus C              |
| Uterine cancer | Female | 20-24 years | 95+ years | 3 | 1  | Socio-demographic Index                           |
| Uterine cancer | Female | 20-24 years | 95+ years | 2 | -1 | Healthcare access and quality index               |
| Uterine cancer | Female | 20-24 years | 95+ years | 2 | 1  | Age- and sex- specific SEV for low fruit          |
| Uterine cancer | Female | 20-24 years | 95+ years | 2 | 1  | Age- and sex- specific SEV for Low vegetables     |

Abbreviations: BMI, body mass index; DR, data rich; GBD, Global Burden of Disease Study; GLB, global; HBsAg, hepatitis B surface antigen; HCV, hepatitis C virus; LDI, lag-distributed income; MET, metabolic equivalent of task; NA, not applicable; PM2.5, particulate matter  $\leq 2.5$  micrometers; PUFA, polyunsaturated fatty acid; SEV, summary exposure value.

Footnote: The "Direction" column refers to the direction of the association for that covariate.



eTable 8: Comparison of GBD 2017 and GBD 2019 covariates used and level of covariates

| Cause                   | Covariate                                             | Sex    | Age start | Age end   | Level in GBD 2017 | Level in GBD 2019 |
|-------------------------|-------------------------------------------------------|--------|-----------|-----------|-------------------|-------------------|
| Acute lymphoid leukemia | Cumulative Cigarettes (10 Years)                      | Female | 0-6 days  | 95+ years | 2                 | 2                 |
| Acute lymphoid leukemia | Cumulative Cigarettes (10 Years)                      | Male   | 0-6 days  | 95+ years | 2                 | 2                 |
| Acute lymphoid leukemia | Cumulative Cigarettes (20 Years)                      | Female | 0-6 days  | 95+ years | 2                 | 2                 |
| Acute lymphoid leukemia | Cumulative Cigarettes (20 Years)                      | Male   | 0-6 days  | 95+ years | 2                 | 2                 |
| Acute lymphoid leukemia | Cumulative Cigarettes (5 Years)                       | Female | 0-6 days  | 95+ years | 2                 | NA                |
| Acute lymphoid leukemia | Cumulative Cigarettes (5 Years)                       | Male   | 0-6 days  | 95+ years | 2                 | NA                |
| Acute lymphoid leukemia | Cumulative Cigarettes (15 Years)                      | Female | 0-6 days  | 95+ years | 2                 | NA                |
| Acute lymphoid leukemia | Cumulative Cigarettes (15 Years)                      | Male   | 0-6 days  | 95+ years | 2                 | NA                |
| Acute lymphoid leukemia | Smoking prevalence                                    | Female | 0-6 days  | 95+ years | 2                 | NA                |
| Acute lymphoid leukemia | Smoking prevalence                                    | Male   | 0-6 days  | 95+ years | 2                 | NA                |
| Acute lymphoid leukemia | Education (years per capita)                          | Female | 0-6 days  | 95+ years | 3                 | 3                 |
| Acute lymphoid leukemia | Education (years per capita)                          | Male   | 0-6 days  | 95+ years | 3                 | 3                 |
| Acute lymphoid leukemia | Healthcare access and quality index                   | Female | 0-6 days  | 95+ years | NA                | 2                 |
| Acute lymphoid leukemia | Healthcare access and quality index                   | Male   | 0-6 days  | 95+ years | NA                | 2                 |
| Acute lymphoid leukemia | LDI (I\$ per capita)                                  | Female | 0-6 days  | 95+ years | 3                 | 3                 |
| Acute lymphoid leukemia | LDI (I\$ per capita)                                  | Male   | 0-6 days  | 95+ years | 3                 | 3                 |
| Acute lymphoid leukemia | Liters of alcohol consumed per capita                 | Female | 0-6 days  | 95+ years | 2                 | 2                 |
| Acute lymphoid leukemia | Liters of alcohol consumed per capita                 | Male   | 0-6 days  | 95+ years | 2                 | 2                 |
| Acute lymphoid leukemia | Log-transformed SEV scalar: Leukemia                  | Female | 0-6 days  | 95+ years | 1                 | 1                 |
| Acute lymphoid leukemia | Log-transformed SEV scalar: Leukemia                  | Male   | 0-6 days  | 95+ years | 1                 | 1                 |
| Acute lymphoid leukemia | Log-transformed age-standardized SEV scalar: Leukemia | Female | 0-6 days  | 95+ years | 1                 | 1                 |
| Acute lymphoid leukemia | Log-transformed age-standardized SEV scalar: Leukemia | Male   | 0-6 days  | 95+ years | 1                 | 1                 |
| Acute lymphoid leukemia | Mean BMI                                              | Female | 0-6 days  | 95+ years | NA                | 2                 |
| Acute lymphoid leukemia | Mean BMI                                              | Male   | 0-6 days  | 95+ years | NA                | 2                 |
| Acute lymphoid leukemia | Socio-demographic Index                               | Female | 0-6 days  | 95+ years | 3                 | 3                 |

|                         |                                                       |        |          |           |    |    |
|-------------------------|-------------------------------------------------------|--------|----------|-----------|----|----|
| Acute lymphoid leukemia | Socio-demographic Index                               | Male   | 0-6 days | 95+ years | 3  | 3  |
| Acute lymphoid leukemia | Tobacco (cigarettes per capita)                       | Female | 0-6 days | 95+ years | 2  | 2  |
| Acute lymphoid leukemia | Tobacco (cigarettes per capita)                       | Male   | 0-6 days | 95+ years | 2  | 2  |
| Acute myeloid leukemia  | Cumulative Cigarettes (10 Years)                      | Female | 0-6 days | 95+ years | 2  | 2  |
| Acute myeloid leukemia  | Cumulative Cigarettes (10 Years)                      | Male   | 0-6 days | 95+ years | 2  | 2  |
| Acute myeloid leukemia  | Cumulative Cigarettes (20 Years)                      | Female | 0-6 days | 95+ years | 2  | 2  |
| Acute myeloid leukemia  | Cumulative Cigarettes (20 Years)                      | Male   | 0-6 days | 95+ years | 2  | 2  |
| Acute myeloid leukemia  | Cumulative Cigarettes (5 Years)                       | Female | 0-6 days | 95+ years | 2  | NA |
| Acute myeloid leukemia  | Cumulative Cigarettes (5 Years)                       | Male   | 0-6 days | 95+ years | 2  | NA |
| Acute myeloid leukemia  | Cumulative Cigarettes (15 Years)                      | Female | 0-6 days | 95+ years | 2  | NA |
| Acute myeloid leukemia  | Cumulative Cigarettes (15 Years)                      | Male   | 0-6 days | 95+ years | 2  | NA |
| Acute myeloid leukemia  | Tobacco (cigarettes per capita)                       | Female | 0-6 days | 95+ years | 2  | NA |
| Acute myeloid leukemia  | Tobacco (cigarettes per capita)                       | Male   | 0-6 days | 95+ years | 2  | NA |
| Acute myeloid leukemia  | Education (years per capita)                          | Female | 0-6 days | 95+ years | 3  | 3  |
| Acute myeloid leukemia  | Education (years per capita)                          | Male   | 0-6 days | 95+ years | 3  | 3  |
| Acute myeloid leukemia  | Healthcare access and quality index                   | Female | 0-6 days | 95+ years | 2  | 2  |
| Acute myeloid leukemia  | Healthcare access and quality index                   | Male   | 0-6 days | 95+ years | 2  | 2  |
| Acute myeloid leukemia  | LDI (I\$ per capita)                                  | Female | 0-6 days | 95+ years | 3  | 3  |
| Acute myeloid leukemia  | LDI (I\$ per capita)                                  | Male   | 0-6 days | 95+ years | 3  | 3  |
| Acute myeloid leukemia  | Liters of alcohol consumed per capita                 | Female | 0-6 days | 95+ years | 2  | 2  |
| Acute myeloid leukemia  | Liters of alcohol consumed per capita                 | Male   | 0-6 days | 95+ years | 2  | 2  |
| Acute myeloid leukemia  | Log-transformed SEV scalar: Leukemia                  | Female | 0-6 days | 95+ years | 1  | 1  |
| Acute myeloid leukemia  | Log-transformed SEV scalar: Leukemia                  | Male   | 0-6 days | 95+ years | 1  | 1  |
| Acute myeloid leukemia  | Log-transformed age-standardized SEV scalar: Leukemia | Female | 0-6 days | 95+ years | 1  | 1  |
| Acute myeloid leukemia  | Log-transformed age-standardized SEV scalar: Leukemia | Male   | 0-6 days | 95+ years | 1  | 1  |
| Acute myeloid leukemia  | Mean BMI                                              | Female | 0-6 days | 95+ years | NA | 2  |
| Acute myeloid leukemia  | Mean BMI                                              | Male   | 0-6 days | 95+ years | NA | 2  |
| Acute myeloid leukemia  | Smoking Prevalence                                    | Female | 0-6 days | 95+ years | 2  | 2  |

|                        |                                                                |        |             |           |    |    |
|------------------------|----------------------------------------------------------------|--------|-------------|-----------|----|----|
| Acute myeloid leukemia | Smoking Prevalence                                             | Male   | 0-6 days    | 95+ years | 2  | 2  |
| Acute myeloid leukemia | Socio-demographic Index                                        | Female | 0-6 days    | 95+ years | 3  | 3  |
| Acute myeloid leukemia | Socio-demographic Index                                        | Male   | 0-6 days    | 95+ years | 3  | 3  |
| Bladder cancer         | Age- and sex-specific SEV for Low fruit                        | Female | 15-19 years | 95+ years | NA | 3  |
| Bladder cancer         | Age- and sex-specific SEV for Low fruit                        | Male   | 15-19 years | 95+ years | NA | 3  |
| Bladder cancer         | Age- and sex-specific SEV for Low vegetables                   | Female | 15-19 years | 95+ years | NA | 2  |
| Bladder cancer         | Age- and sex-specific SEV for Low vegetables                   | Male   | 15-19 years | 95+ years | NA | 2  |
| Bladder cancer         | Fruits adjusted (g)                                            | Female | 15-19 years | 95+ years | 2  | NA |
| Bladder cancer         | Fruits adjusted (g)                                            | Male   | 15-19 years | 95+ years | 2  | NA |
| Bladder cancer         | Vegetables adjusted (g)                                        | Female | 15-19 years | 95+ years | 2  | NA |
| Bladder cancer         | Vegetables adjusted (g)                                        | Male   | 15-19 years | 95+ years | 2  | NA |
| Bladder cancer         | Cumulative Cigarettes (10 Years)                               | Female | 15-19 years | 95+ years | 1  | 2  |
| Bladder cancer         | Cumulative Cigarettes (10 Years)                               | Male   | 15-19 years | 95+ years | 1  | 2  |
| Bladder cancer         | Cumulative Cigarettes (5 Years)                                | Female | 15-19 years | 95+ years | 1  | NA |
| Bladder cancer         | Cumulative Cigarettes (5 Years)                                | Male   | 15-19 years | 95+ years | 1  | NA |
| Bladder cancer         | Cumulative Cigarettes (15 Years)                               | Female | 15-19 years | 95+ years | 1  | NA |
| Bladder cancer         | Cumulative Cigarettes (15 Years)                               | Male   | 15-19 years | 95+ years | 1  | NA |
| Bladder cancer         | Education (years per capita)                                   | Female | 15-19 years | 95+ years | 3  | NA |
| Bladder cancer         | Education (years per capita)                                   | Male   | 15-19 years | 95+ years | 3  | NA |
| Bladder cancer         | Diabetes Fasting Plasma Glucose (mmol/L), age-standardized 25+ | Female | 15-19 years | 95+ years | NA | 2  |
| Bladder cancer         | Diabetes Fasting Plasma Glucose (mmol/L), age-standardized 25+ | Male   | 15-19 years | 95+ years | NA | 2  |
| Bladder cancer         | Healthcare access and quality index                            | Female | 15-19 years | 95+ years | 2  | 2  |
| Bladder cancer         | Healthcare access and quality index                            | Male   | 15-19 years | 95+ years | 2  | 2  |
| Bladder cancer         | LDI (I\$ per capita)                                           | Female | 15-19 years | 95+ years | 3  | 3  |
| Bladder cancer         | LDI (I\$ per capita)                                           | Male   | 15-19 years | 95+ years | 3  | 3  |
| Bladder cancer         | Liters of alcohol consumed per capita                          | Female | 15-19 years | 95+ years | 2  | 2  |
| Bladder cancer         | Liters of alcohol consumed per capita                          | Male   | 15-19 years | 95+ years | 2  | 2  |
| Bladder cancer         | Log-transformed SEV scalar: Bladder C                          | Female | 15-19 years | 95+ years | 1  | 1  |

|                                 |                                              |        |             |           |    |    |
|---------------------------------|----------------------------------------------|--------|-------------|-----------|----|----|
| Bladder cancer                  | Log-transformed SEV scalar: Bladder C        | Male   | 15-19 years | 95+ years | 1  | 1  |
| Bladder cancer                  | Schistosomiasis Prevalence Results           | Female | 15-19 years | 95+ years | NA | 1  |
| Bladder cancer                  | Schistosomiasis Prevalence Results           | Male   | 15-19 years | 95+ years | NA | 1  |
| Bladder cancer                  | Schistosomiasis Prevalence (proportion)      | Female | 15-19 years | 95+ years | 1  | NA |
| Bladder cancer                  | Schistosomiasis Prevalence (proportion)      | Male   | 15-19 years | 95+ years | 1  | NA |
| Bladder cancer                  | Smoking Prevalence                           | Female | 15-19 years | 95+ years | 1  | 1  |
| Bladder cancer                  | Smoking Prevalence                           | Male   | 15-19 years | 95+ years | 1  | 1  |
| Bladder cancer                  | Socio-demographic Index                      | Female | 15-19 years | 95+ years | 3  | 3  |
| Bladder cancer                  | Socio-demographic Index                      | Male   | 15-19 years | 95+ years | 3  | 3  |
| Brain and nervous system cancer | Age- and sex- specific SEV for low fruit     | Female | 0-6 days    | 95+ years | NA | 2  |
| Brain and nervous system cancer | Age- and sex- specific SEV for low fruit     | Male   | 0-6 days    | 95+ years | NA | 2  |
| Brain and nervous system cancer | Age- and sex-specific SEV for High red meat  | Female | 0-6 days    | 95+ years | NA | 2  |
| Brain and nervous system cancer | Age- and sex-specific SEV for High red meat  | Male   | 0-6 days    | 95+ years | NA | 2  |
| Brain and nervous system cancer | Age- and sex-specific SEV for Low vegetables | Female | 0-6 days    | 95+ years | NA | 2  |
| Brain and nervous system cancer | Age- and sex-specific SEV for Low vegetables | Male   | 0-6 days    | 95+ years | NA | 2  |
| Brain and nervous system cancer | Fruits adjusted (g)                          | Female | 0-6 days    | 95+ years | 2  | NA |
| Brain and nervous system cancer | Fruits adjusted (g)                          | Male   | 0-6 days    | 95+ years | 2  | NA |
| Brain and nervous system cancer | Red meats adjusted (g)                       | Female | 0-6 days    | 95+ years | 2  | NA |
| Brain and nervous system cancer | Red meats adjusted (g)                       | Male   | 0-6 days    | 95+ years | 2  | NA |
| Brain and nervous system cancer | Vegetables adjusted (g)                      | Female | 0-6 days    | 95+ years | 2  | NA |
| Brain and nervous system cancer | Vegetables adjusted (g)                      | Male   | 0-6 days    | 95+ years | 2  | NA |
| Brain and nervous system cancer | Cholesterol (total, mean per capita)         | Female | 0-6 days    | 95+ years | 2  | 2  |
| Brain and nervous system cancer | Cholesterol (total, mean per capita)         | Male   | 0-6 days    | 95+ years | 2  | 2  |
| Brain and nervous system cancer | Cumulative Cigarettes (10 Years)             | Female | 0-6 days    | 95+ years | 1  | 1  |
| Brain and nervous system cancer | Cumulative Cigarettes (10 Years)             | Male   | 0-6 days    | 95+ years | 1  | 1  |
| Brain and nervous system cancer | Cumulative Cigarettes (15 Years)             | Female | 0-6 days    | 95+ years | 1  | NA |
| Brain and nervous system cancer | Cumulative Cigarettes (15 Years)             | Male   | 0-6 days    | 95+ years | 1  | NA |
| Brain and nervous system cancer | Education (years per capita)                 | Female | 0-6 days    | 95+ years | 3  | 3  |
| Brain and nervous system cancer | Education (years per capita)                 | Male   | 0-6 days    | 95+ years | 3  | 3  |
| Brain and nervous system cancer | Healthcare access and quality index          | Female | 0-6 days    | 95+ years | 2  | 2  |

|                                 |                                              |        |             |           |    |    |
|---------------------------------|----------------------------------------------|--------|-------------|-----------|----|----|
| Brain and nervous system cancer | Healthcare access and quality index          | Male   | 0-6 days    | 95+ years | 2  | 2  |
| Brain and nervous system cancer | LDI (I\$ per capita)                         | Female | 0-6 days    | 95+ years | 3  | 3  |
| Brain and nervous system cancer | LDI (I\$ per capita)                         | Male   | 0-6 days    | 95+ years | 3  | 3  |
| Brain and nervous system cancer | Liters of alcohol consumed per capita        | Female | 0-6 days    | 95+ years | 1  | 1  |
| Brain and nervous system cancer | Liters of alcohol consumed per capita        | Male   | 0-6 days    | 95+ years | 1  | 1  |
| Brain and nervous system cancer | Smoking Prevalence                           | Female | 0-6 days    | 95+ years | 1  | 1  |
| Brain and nervous system cancer | Smoking Prevalence                           | Male   | 0-6 days    | 95+ years | 1  | 1  |
| Brain and nervous system cancer | Socio-demographic Index                      | Female | 0-6 days    | 95+ years | 3  | 3  |
| Brain and nervous system cancer | Socio-demographic Index                      | Male   | 0-6 days    | 95+ years | 3  | 3  |
| Brain and nervous system cancer | Systolic Blood Pressure (mmHg)               | Female | 0-6 days    | 95+ years | 2  | 2  |
| Brain and nervous system cancer | Systolic Blood Pressure (mmHg)               | Male   | 0-6 days    | 95+ years | 2  | 2  |
| Breast cancer                   | Age- and sex- specific SEV for low fruit     | Female | 15-19 years | 95+ years | 2  | NA |
| Breast cancer                   | Age- and sex- specific SEV for low fruit     | Male   | 15-19 years | 95+ years | 2  | NA |
| Breast cancer                   | Age- and sex-specific SEV for Low vegetables | Female | 15-19 years | 95+ years | 2  | NA |
| Breast cancer                   | Age- and sex-specific SEV for Low vegetables | Male   | 15-19 years | 95+ years | 2  | NA |
| Breast cancer                   | Fruits adjusted (g)                          | Female | 15-19 years | 95+ years | NA | 2  |
| Breast cancer                   | Fruits adjusted (g)                          | Male   | 15-19 years | 95+ years | NA | 2  |
| Breast cancer                   | Vegetables adjusted (g)                      | Female | 15-19 years | 95+ years | NA | 2  |
| Breast cancer                   | Vegetables adjusted (g)                      | Male   | 15-19 years | 95+ years | NA | 2  |
| Breast cancer                   | Age-specific fertility rate                  | Female | 15-19 years | 95+ years | 2  | 2  |
| Breast cancer                   | Cumulative Cigarettes (10 years)             | Female | 15-19 years | 95+ years | 2  | 2  |
| Breast cancer                   | Cumulative Cigarettes (10 years)             | Male   | 15-19 years | 95+ years | 2  | 2  |
| Breast cancer                   | Cumulative Cigarettes (20 years)             | Female | 15-19 years | 95+ years | 2  | 2  |
| Breast cancer                   | Cumulative Cigarettes (20 years)             | Male   | 15-19 years | 95+ years | 2  | 2  |
| Breast cancer                   | Cumulative Cigarettes (5 Years)              | Female | 15-19 years | 95+ years | 2  | NA |
| Breast cancer                   | Cumulative Cigarettes (5 Years)              | Male   | 15-19 years | 95+ years | 2  | NA |
| Breast cancer                   | Cumulative Cigarettes (15 Years)             | Female | 15-19 years | 95+ years | 2  | NA |
| Breast cancer                   | Cumulative Cigarettes (15 Years)             | Male   | 15-19 years | 95+ years | 2  | NA |
| Breast cancer                   | Education (years per capita)                 | Female | 15-19 years | 95+ years | 3  | NA |
| Breast cancer                   | Education (years per capita)                 | Male   | 15-19 years | 95+ years | 3  | NA |

|                 |                                                                |        |             |           |    |    |
|-----------------|----------------------------------------------------------------|--------|-------------|-----------|----|----|
| Breast cancer   | Diabetes Fasting Plasma Glucose (mmol/L), age-standardized 25+ | Female | 15-19 years | 95+ years | NA | 2  |
| Breast cancer   | Diabetes Fasting Plasma Glucose (mmol/L), age-standardized 25+ | Male   | 15-19 years | 95+ years | NA | 2  |
| Breast cancer   | Healthcare access and quality index                            | Female | 15-19 years | 95+ years | 2  | 2  |
| Breast cancer   | Healthcare access and quality index                            | Male   | 15-19 years | 95+ years | 2  | 2  |
| Breast cancer   | LDI (I\$ per capita)                                           | Female | 15-19 years | 95+ years | 3  | 3  |
| Breast cancer   | LDI (I\$ per capita)                                           | Male   | 15-19 years | 95+ years | 3  | NA |
| Breast cancer   | Liters of alcohol consumed per capita                          | Female | 15-19 years | 95+ years | 1  | 1  |
| Breast cancer   | Liters of alcohol consumed per capita                          | Male   | 15-19 years | 95+ years | 1  | 3  |
| Breast cancer   | Log-transformed SEV scalar: Breast C                           | Female | 15-19 years | 95+ years | 1  | 1  |
| Breast cancer   | Log-transformed SEV scalar: Breast C                           | Male   | 15-19 years | 95+ years | 1  | NA |
| Breast cancer   | Mean BMI                                                       | Female | 15-19 years | 95+ years | 1  | 1  |
| Breast cancer   | Mean BMI                                                       | Male   | 15-19 years | 95+ years | 1  | 3  |
| Breast cancer   | Smoking Prevalence                                             | Female | 15-19 years | 95+ years | 2  | 2  |
| Breast cancer   | Smoking Prevalence                                             | Male   | 15-19 years | 95+ years | 2  | NA |
| Breast cancer   | Socio-demographic Index                                        | Female | 15-19 years | 95+ years | 3  | 3  |
| Breast cancer   | Socio-demographic Index                                        | Male   | 15-19 years | 95+ years | 3  | 2  |
| Breast cancer   | Total Fertility Rate                                           | Female | 15-19 years | 95+ years | 2  | 2  |
| Cervical cancer | Age- and sex- specific SEV for low fruit                       | Female | 15-19 years | 95+ years | NA | 2  |
| Cervical cancer | Age- and sex-specific SEV for Low vegetables                   | Female | 15-19 years | 95+ years | NA | 2  |
| Cervical cancer | Fruits adjusted (g)                                            | Female | 15-19 years | 95+ years | 2  | NA |
| Cervical cancer | Vegetables adjusted (g)                                        | Female | 15-19 years | 95+ years | 2  | NA |
| Cervical cancer | Age-specific fertility rate                                    | Female | 15-19 years | 95+ years | 2  | 2  |
| Cervical cancer | Cumulative Cigarettes (5 Years)                                | Female | 15-19 years | 95+ years | 1  | 1  |
| Cervical cancer | Cumulative Cigarettes (10 Years)                               | Female | 15-19 years | 95+ years | 1  | NA |
| Cervical cancer | Cumulative Cigarettes (15 Years)                               | Female | 15-19 years | 95+ years | 1  | NA |
| Cervical cancer | Education (years per capita)                                   | Female | 15-19 years | 95+ years | 3  | 3  |
| Cervical cancer | HIV age-standardized prevalence                                | Female | 15-19 years | 95+ years | 1  | 1  |
| Cervical cancer | Healthcare access and quality index                            | Female | 15-19 years | 95+ years | 2  | 2  |

|                           |                                                       |        |             |           |    |   |
|---------------------------|-------------------------------------------------------|--------|-------------|-----------|----|---|
| Cervical cancer           | LDI (I\$ per capita)                                  | Female | 15-19 years | 95+ years | 3  | 3 |
| Cervical cancer           | Smoking Prevalence                                    | Female | 15-19 years | 95+ years | 2  | 2 |
| Cervical cancer           | Socio-demographic Index                               | Female | 15-19 years | 95+ years | 3  | 3 |
| Cervical cancer           | Total Fertility Rate                                  | Female | 15-19 years | 95+ years | 2  | 2 |
| Chronic lymphoid leukemia | Cumulative Cigarettes (10 years)                      | Female | 20-24 years | 95+ years | 2  | 2 |
| Chronic lymphoid leukemia | Cumulative Cigarettes (10 years)                      | Male   | 20-24 years | 95+ years | 2  | 2 |
| Chronic lymphoid leukemia | Cumulative Cigarettes (15 years)                      | Female | 20-24 years | 95+ years | 2  | 2 |
| Chronic lymphoid leukemia | Cumulative Cigarettes (15 years)                      | Male   | 20-24 years | 95+ years | 2  | 2 |
| Chronic lymphoid leukemia | Cumulative Cigarettes (20 years)                      | Female | 20-24 years | 95+ years | 2  | 2 |
| Chronic lymphoid leukemia | Cumulative Cigarettes (20 years)                      | Male   | 20-24 years | 95+ years | 2  | 2 |
| Chronic lymphoid leukemia | Cumulative Cigarettes (5 years)                       | Female | 20-24 years | 95+ years | 2  | 2 |
| Chronic lymphoid leukemia | Cumulative Cigarettes (5 years)                       | Male   | 20-24 years | 95+ years | 2  | 2 |
| Chronic lymphoid leukemia | Education (years per capita)                          | Female | 20-24 years | 95+ years | 3  | 3 |
| Chronic lymphoid leukemia | Education (years per capita)                          | Male   | 20-24 years | 95+ years | 3  | 3 |
| Chronic lymphoid leukemia | Healthcare access and quality index                   | Female | 20-24 years | 95+ years | 1  | 1 |
| Chronic lymphoid leukemia | Healthcare access and quality index                   | Male   | 20-24 years | 95+ years | 2  | 2 |
| Chronic lymphoid leukemia | LDI (I\$ per capita)                                  | Female | 20-24 years | 95+ years | 3  | 3 |
| Chronic lymphoid leukemia | LDI (I\$ per capita)                                  | Male   | 20-24 years | 95+ years | 3  | 3 |
| Chronic lymphoid leukemia | Liters of alcohol consumed per capita                 | Female | 20-24 years | 95+ years | 2  | 2 |
| Chronic lymphoid leukemia | Liters of alcohol consumed per capita                 | Male   | 20-24 years | 95+ years | 2  | 2 |
| Chronic lymphoid leukemia | Log-transformed SEV scalar: Leukemia                  | Female | 20-24 years | 95+ years | 1  | 1 |
| Chronic lymphoid leukemia | Log-transformed SEV scalar: Leukemia                  | Male   | 20-24 years | 95+ years | 1  | 1 |
| Chronic lymphoid leukemia | Log-transformed age-standardized SEV scalar: Leukemia | Female | 20-24 years | 95+ years | 1  | 1 |
| Chronic lymphoid leukemia | Log-transformed age-standardized SEV scalar: Leukemia | Male   | 20-24 years | 95+ years | 1  | 1 |
| Chronic lymphoid leukemia | Mean BMI                                              | Female | 20-24 years | 95+ years | NA | 2 |
| Chronic lymphoid leukemia | Mean BMI                                              | Male   | 20-24 years | 95+ years | NA | 2 |
| Chronic lymphoid leukemia | Smoking Prevalence                                    | Female | 20-24 years | 95+ years | 2  | 2 |
| Chronic lymphoid leukemia | Smoking Prevalence                                    | Male   | 20-24 years | 95+ years | 2  | 2 |

|                           |                                                       |        |             |           |    |   |
|---------------------------|-------------------------------------------------------|--------|-------------|-----------|----|---|
| Chronic lymphoid leukemia | Socio-demographic Index                               | Female | 20-24 years | 95+ years | 3  | 3 |
| Chronic lymphoid leukemia | Socio-demographic Index                               | Male   | 20-24 years | 95+ years | 3  | 3 |
| Chronic lymphoid leukemia | Tobacco (cigarettes per capita)                       | Female | 20-24 years | 95+ years | 2  | 2 |
| Chronic lymphoid leukemia | Tobacco (cigarettes per capita)                       | Male   | 20-24 years | 95+ years | 2  | 2 |
| Chronic myeloid leukemia  | Cumulative Cigarettes (10 years)                      | Female | 0-6 days    | 95+ years | 2  | 2 |
| Chronic myeloid leukemia  | Cumulative Cigarettes (10 years)                      | Male   | 0-6 days    | 95+ years | 2  | 2 |
| Chronic myeloid leukemia  | Cumulative Cigarettes (15 years)                      | Female | 0-6 days    | 95+ years | 2  | 2 |
| Chronic myeloid leukemia  | Cumulative Cigarettes (15 years)                      | Male   | 0-6 days    | 95+ years | 2  | 2 |
| Chronic myeloid leukemia  | Cumulative Cigarettes (20 years)                      | Female | 0-6 days    | 95+ years | 2  | 2 |
| Chronic myeloid leukemia  | Cumulative Cigarettes (20 years)                      | Male   | 0-6 days    | 95+ years | 2  | 2 |
| Chronic myeloid leukemia  | Cumulative Cigarettes (5 years)                       | Female | 0-6 days    | 95+ years | 2  | 2 |
| Chronic myeloid leukemia  | Cumulative Cigarettes (5 years)                       | Male   | 0-6 days    | 95+ years | 2  | 2 |
| Chronic myeloid leukemia  | Education (years per capita)                          | Female | 0-6 days    | 95+ years | 3  | 3 |
| Chronic myeloid leukemia  | Education (years per capita)                          | Male   | 0-6 days    | 95+ years | 3  | 3 |
| Chronic myeloid leukemia  | Healthcare access and quality index                   | Female | 0-6 days    | 95+ years | 2  | 2 |
| Chronic myeloid leukemia  | Healthcare access and quality index                   | Male   | 0-6 days    | 95+ years | 2  | 2 |
| Chronic myeloid leukemia  | LDI (I\$ per capita)                                  | Female | 0-6 days    | 95+ years | 3  | 3 |
| Chronic myeloid leukemia  | LDI (I\$ per capita)                                  | Male   | 0-6 days    | 95+ years | 3  | 3 |
| Chronic myeloid leukemia  | Liters of alcohol consumed per capita                 | Female | 0-6 days    | 95+ years | 2  | 2 |
| Chronic myeloid leukemia  | Liters of alcohol consumed per capita                 | Male   | 0-6 days    | 95+ years | 2  | 2 |
| Chronic myeloid leukemia  | Log-transformed SEV scalar: Leukemia                  | Female | 0-6 days    | 95+ years | 1  | 1 |
| Chronic myeloid leukemia  | Log-transformed SEV scalar: Leukemia                  | Male   | 0-6 days    | 95+ years | 1  | 1 |
| Chronic myeloid leukemia  | Log-transformed age-standardized SEV scalar: Leukemia | Female | 0-6 days    | 95+ years | 1  | 1 |
| Chronic myeloid leukemia  | Log-transformed age-standardized SEV scalar: Leukemia | Male   | 0-6 days    | 95+ years | 1  | 1 |
| Chronic myeloid leukemia  | Mean BMI                                              | Female | 0-6 days    | 95+ years | NA | 2 |
| Chronic myeloid leukemia  | Mean BMI                                              | Male   | 0-6 days    | 95+ years | NA | 2 |
| Chronic myeloid leukemia  | Smoking Prevalence                                    | Female | 0-6 days    | 95+ years | 2  | 2 |
| Chronic myeloid leukemia  | Smoking Prevalence                                    | Male   | 0-6 days    | 95+ years | 2  | 2 |



|                          |                                                  |        |           |           |    |    |
|--------------------------|--------------------------------------------------|--------|-----------|-----------|----|----|
| Chronic myeloid leukemia | Socio-demographic Index                          | Female | 0-6 days  | 95+ years | 3  | 3  |
| Chronic myeloid leukemia | Socio-demographic Index                          | Male   | 0-6 days  | 95+ years | 3  | 3  |
| Chronic myeloid leukemia | Tobacco (cigarettes per capita)                  | Female | 0-6 days  | 95+ years | 2  | 2  |
| Chronic myeloid leukemia | Tobacco (cigarettes per capita)                  | Male   | 0-6 days  | 95+ years | 2  | 2  |
| Colon and rectum cancer  | Age- and sex- specific SEV for low fruit         | Female | 5-9 years | 95+ years | NA | 3  |
| Colon and rectum cancer  | Age- and sex- specific SEV for low fruit         | Male   | 5-9 years | 95+ years | NA | 3  |
| Colon and rectum cancer  | Age- and sex-specific SEV for High red meat      | Female | 5-9 years | 95+ years | NA | 1  |
| Colon and rectum cancer  | Age- and sex-specific SEV for High red meat      | Male   | 5-9 years | 95+ years | NA | 1  |
| Colon and rectum cancer  | Fruits adjusted (g)                              | Female | 5-9 years | 95+ years | 2  | NA |
| Colon and rectum cancer  | Fruits adjusted (g)                              | Male   | 5-9 years | 95+ years | 2  | NA |
| Colon and rectum cancer  | Red meats adjusted (g)                           | Female | 5-9 years | 95+ years | 1  | NA |
| Colon and rectum cancer  | Red meats adjusted (g)                           | Male   | 5-9 years | 95+ years | 1  | NA |
| Colon and rectum cancer  | Age- and sex-specific SEV for Low calcium        | Female | 5-9 years | 95+ years | NA | 2  |
| Colon and rectum cancer  | Age- and sex-specific SEV for Low calcium        | Male   | 5-9 years | 95+ years | NA | 2  |
| Colon and rectum cancer  | Age- and sex-specific SEV for Low fiber          | Female | 5-9 years | 95+ years | NA | 2  |
| Colon and rectum cancer  | Age- and sex-specific SEV for Low fiber          | Male   | 5-9 years | 95+ years | NA | 2  |
| Colon and rectum cancer  | Age- and sex-specific SEV for Low milk           | Female | 5-9 years | 95+ years | NA | 3  |
| Colon and rectum cancer  | Age- and sex-specific SEV for Low milk           | Male   | 5-9 years | 95+ years | NA | 3  |
| Colon and rectum cancer  | Age- and sex-specific SEV for Low nuts and seeds | Female | 5-9 years | 95+ years | NA | 3  |
| Colon and rectum cancer  | Age- and sex-specific SEV for Low nuts and seeds | Male   | 5-9 years | 95+ years | NA | 3  |
| Colon and rectum cancer  | Age- and sex-specific SEV for Low vegetables     | Female | 5-9 years | 95+ years | NA | 2  |
| Colon and rectum cancer  | Age- and sex-specific SEV for Low vegetables     | Male   | 5-9 years | 95+ years | NA | 2  |
| Colon and rectum cancer  | Milk adjusted (g)                                | Female | 5-9 years | 95+ years | 2  | NA |
| Colon and rectum cancer  | Milk adjusted (g)                                | Male   | 5-9 years | 95+ years | 2  | NA |
| Colon and rectum cancer  | Nuts seeds adjusted (g)                          | Female | 5-9 years | 95+ years | 2  | NA |
| Colon and rectum cancer  | Nuts seeds adjusted (g)                          | Male   | 5-9 years | 95+ years | 2  | NA |
| Colon and rectum cancer  | Vegetables adjusted (g)                          | Female | 5-9 years | 95+ years | 2  | NA |
| Colon and rectum cancer  | Vegetables adjusted (g)                          | Male   | 5-9 years | 95+ years | 2  | NA |

|                         |                                                                |        |           |           |    |    |
|-------------------------|----------------------------------------------------------------|--------|-----------|-----------|----|----|
| Colon and rectum cancer | Cumulative Cigarettes (5 Years)                                | Female | 5-9 years | 95+ years | 2  | 2  |
| Colon and rectum cancer | Cumulative Cigarettes (5 Years)                                | Male   | 5-9 years | 95+ years | 2  | 2  |
| Colon and rectum cancer | Cumulative Cigarettes (10 Years)                               | Female | 5-9 years | 95+ years | 2  | NA |
| Colon and rectum cancer | Cumulative Cigarettes (10 Years)                               | Male   | 5-9 years | 95+ years | 2  | NA |
| Colon and rectum cancer | Cumulative Cigarettes (15 Years)                               | Female | 5-9 years | 95+ years | 2  | NA |
| Colon and rectum cancer | Cumulative Cigarettes (15 years)                               | Male   | 5-9 years | 95+ years | 2  | NA |
| Colon and rectum cancer | Cumulative Cigarettes (20 Years)                               | Female | 5-9 years | 95+ years | 2  | NA |
| Colon and rectum cancer | Cumulative Cigarettes (20 Years)                               | Male   | 5-9 years | 95+ years | 2  | 2  |
| Colon and rectum cancer | Smoking Prevalence                                             | Female | 5-9 years | 95+ years | 1  | NA |
| Colon and rectum cancer | Smoking Prevalence                                             | Male   | 5-9 years | 95+ years | 1  | NA |
| Colon and rectum cancer | Diabetes Fasting Plasma Glucose (mmol/L), age-standardized 25+ | Female | 5-9 years | 95+ years | NA | 2  |
| Colon and rectum cancer | Diabetes Fasting Plasma Glucose (mmol/L), age-standardized 25+ | Male   | 5-9 years | 95+ years | NA | 2  |
| Colon and rectum cancer | Diabetes Age-Specific Prevalence (proportion)                  | Female | 5-9 years | 95+ years | 2  | NA |
| Colon and rectum cancer | Diabetes Age-Specific Prevalence (proportion)                  | Male   | 5-9 years | 95+ years | 2  | NA |
| Colon and rectum cancer | Education (years per capita)                                   | Female | 5-9 years | 95+ years | 3  | 3  |
| Colon and rectum cancer | Education (years per capita)                                   | Male   | 5-9 years | 95+ years | 3  | 3  |
| Colon and rectum cancer | Healthcare access and quality index                            | Female | 5-9 years | 95+ years | 2  | 3  |
| Colon and rectum cancer | Healthcare access and quality index                            | Male   | 5-9 years | 95+ years | 2  | 3  |
| Colon and rectum cancer | LDI (I\$ per capita)                                           | Female | 5-9 years | 95+ years | 3  | 3  |
| Colon and rectum cancer | LDI (I\$ per capita)                                           | Male   | 5-9 years | 95+ years | 3  | 3  |
| Colon and rectum cancer | Liters of alcohol consumed per capita                          | Female | 5-9 years | 95+ years | 1  | 2  |
| Colon and rectum cancer | Liters of alcohol consumed per capita                          | Male   | 5-9 years | 95+ years | 1  | 2  |
| Colon and rectum cancer | Log-transformed SEV scalar: Colorect C                         | Female | 5-9 years | 95+ years | 1  | 1  |
| Colon and rectum cancer | Log-transformed SEV scalar: Colorect C                         | Male   | 5-9 years | 95+ years | 1  | 1  |
| Colon and rectum cancer | Mean BMI                                                       | Female | 5-9 years | 95+ years | 1  | 1  |
| Colon and rectum cancer | Mean BMI                                                       | Male   | 5-9 years | 95+ years | 1  | 1  |
| Colon and rectum cancer | Socio-demographic Index                                        | Female | 5-9 years | 95+ years | 3  | 3  |

|                         |                                                      |        |             |           |    |    |
|-------------------------|------------------------------------------------------|--------|-------------|-----------|----|----|
| Colon and rectum cancer | Socio-demographic Index                              | Male   | 5-9 years   | 95+ years | 3  | 3  |
| Colon and rectum cancer | Tobacco (cigarettes per capita)                      | Female | 5-9 years   | 95+ years | 1  | 1  |
| Colon and rectum cancer | Tobacco (cigarettes per capita)                      | Male   | 5-9 years   | 95+ years | 1  | 1  |
| Colon and rectum cancer | Total Physical Activity (MET-min/week), Age-specific | Female | 5-9 years   | 95+ years | NA | 1  |
| Colon and rectum cancer | Total Physical Activity (MET-min/week), Age-specific | Male   | 5-9 years   | 95+ years | NA | 1  |
| Colon and rectum cancer | PUFA adjusted(percent)                               | Female | 5-9 years   | 95+ years | 2  | 2  |
| Colon and rectum cancer | PUFA adjusted(percent)                               | Male   | 5-9 years   | 95+ years | 2  | 2  |
| Esophageal cancer       | Age- and sex- specific SEV for low fruit             | Female | 20-24 years | 95+ years | NA | 2  |
| Esophageal cancer       | Age- and sex- specific SEV for low fruit             | Male   | 20-24 years | 95+ years | NA | 2  |
| Esophageal cancer       | Age- and sex-specific SEV for Low vegetables         | Female | 20-24 years | 95+ years | NA | 2  |
| Esophageal cancer       | Age- and sex-specific SEV for Low vegetables         | Male   | 20-24 years | 95+ years | NA | 2  |
| Esophageal cancer       | Fruits adjusted (g)                                  | Female | 20-24 years | 95+ years | 1  | NA |
| Esophageal cancer       | Fruits adjusted (g)                                  | Male   | 20-24 years | 95+ years | 1  | NA |
| Esophageal cancer       | Vegetables adjusted (g)                              | Female | 20-24 years | 95+ years | 2  | NA |
| Esophageal cancer       | Vegetables adjusted (g)                              | Male   | 20-24 years | 95+ years | 2  | NA |
| Esophageal cancer       | Education (years per capita)                         | Female | 20-24 years | 95+ years | 3  | 3  |
| Esophageal cancer       | Education (years per capita)                         | Male   | 20-24 years | 95+ years | 3  | 3  |
| Esophageal cancer       | Healthcare access and quality index                  | Female | 20-24 years | 95+ years | 2  | 2  |
| Esophageal cancer       | Healthcare access and quality index                  | Male   | 20-24 years | 95+ years | 2  | 2  |
| Esophageal cancer       | Improved Water Source (proportion with access)       | Female | 20-24 years | 95+ years | 2  | 3  |
| Esophageal cancer       | Improved Water Source (proportion with access)       | Male   | 20-24 years | 95+ years | 2  | 3  |
| Esophageal cancer       | Indoor Air Pollution (All Cooking Fuels)             | Female | 20-24 years | 95+ years | 2  | 2  |
| Esophageal cancer       | Indoor Air Pollution (All Cooking Fuels)             | Male   | 20-24 years | 95+ years | 2  | 2  |
| Esophageal cancer       | LDI (I\$ per capita)                                 | Female | 20-24 years | 95+ years | 3  | 3  |
| Esophageal cancer       | LDI (I\$ per capita)                                 | Male   | 20-24 years | 95+ years | 3  | 3  |
| Esophageal cancer       | Liters of alcohol consumed per capita                | Female | 20-24 years | 95+ years | 1  | 1  |
| Esophageal cancer       | Liters of alcohol consumed per capita                | Male   | 20-24 years | 95+ years | 1  | 1  |

|                                      |                                                        |        |             |           |    |    |
|--------------------------------------|--------------------------------------------------------|--------|-------------|-----------|----|----|
| Esophageal cancer                    | Log-transformed SEV scalar: Esophag C                  | Female | 20-24 years | 95+ years | 1  | NA |
| Esophageal cancer                    | Log-transformed SEV scalar: Esophag C                  | Male   | 20-24 years | 95+ years | 1  | NA |
| Esophageal cancer                    | Log-transformed age-standardized SEV scalar: Esophag C | Female | 20-24 years | 95+ years | 1  | 1  |
| Esophageal cancer                    | Log-transformed age-standardized SEV scalar: Esophag C | Male   | 20-24 years | 95+ years | 1  | 1  |
| Esophageal cancer                    | Mean BMI                                               | Female | 20-24 years | 95+ years | 1  | 1  |
| Esophageal cancer                    | Mean BMI                                               | Male   | 20-24 years | 95+ years | 1  | 1  |
| Esophageal cancer                    | Sanitation (proportion with access)                    | Female | 20-24 years | 95+ years | 2  | 3  |
| Esophageal cancer                    | Sanitation (proportion with access)                    | Male   | 20-24 years | 95+ years | 2  | 3  |
| Esophageal cancer                    | Smoking Prevalence                                     | Female | 20-24 years | 95+ years | 1  | 1  |
| Esophageal cancer                    | Smoking Prevalence                                     | Male   | 20-24 years | 95+ years | 1  | 1  |
| Esophageal cancer                    | Socio-demographic Index                                | Female | 20-24 years | 95+ years | 3  | 3  |
| Esophageal cancer                    | Socio-demographic Index                                | Male   | 20-24 years | 95+ years | 3  | 3  |
| Esophageal cancer                    | Tobacco (cigarettes per capita)                        | Female | 20-24 years | 95+ years | 1  | 2  |
| Esophageal cancer                    | Tobacco (cigarettes per capita)                        | Male   | 20-24 years | 95+ years | 1  | 2  |
| Gallbladder and biliary tract cancer | Age- and sex- specific SEV for low fruit               | Female | 20-24 years | 95+ years | NA | 2  |
| Gallbladder and biliary tract cancer | Age- and sex- specific SEV for low fruit               | Male   | 20-24 years | 95+ years | NA | 2  |
| Gallbladder and biliary tract cancer | Age- and sex-specific SEV for Low vegetables           | Female | 20-24 years | 95+ years | NA | 2  |
| Gallbladder and biliary tract cancer | Age- and sex-specific SEV for Low vegetables           | Male   | 20-24 years | 95+ years | NA | 2  |
| Gallbladder and biliary tract cancer | Fruits adjusted (g)                                    | Female | 20-24 years | 95+ years | 2  | NA |
| Gallbladder and biliary tract cancer | Fruits adjusted (g)                                    | Male   | 20-24 years | 95+ years | 2  | NA |
| Gallbladder and biliary tract cancer | Vegetables adjusted (g)                                | Female | 20-24 years | 95+ years | 2  | NA |
| Gallbladder and biliary tract cancer | Vegetables adjusted (g)                                | Male   | 20-24 years | 95+ years | 2  | NA |
| Gallbladder and biliary tract cancer | Cumulative Cigarettes (10 years)                       | Female | 20-24 years | 95+ years | 2  | 2  |
| Gallbladder and biliary tract cancer | Cumulative Cigarettes (10 years)                       | Male   | 20-24 years | 95+ years | 2  | 2  |
| Gallbladder and biliary tract cancer | Cumulative Cigarettes (5 Years)                        | Female | 20-24 years | 95+ years | 2  | 2  |
| Gallbladder and biliary tract cancer | Cumulative Cigarettes (5 Years)                        | Male   | 20-24 years | 95+ years | 2  | 2  |
| Gallbladder and biliary tract cancer | Diabetes Age-Standardized Prevalence (proportion)      | Female | 20-24 years | 95+ years | 2  | 2  |

|                                      |                                                   |        |             |           |   |   |
|--------------------------------------|---------------------------------------------------|--------|-------------|-----------|---|---|
| Gallbladder and biliary tract cancer | Diabetes Age-Standardized Prevalence (proportion) | Male   | 20-24 years | 95+ years | 2 | 2 |
| Gallbladder and biliary tract cancer | Education (years per capita)                      | Female | 20-24 years | 95+ years | 3 | 3 |
| Gallbladder and biliary tract cancer | Education (years per capita)                      | Male   | 20-24 years | 95+ years | 3 | 3 |
| Gallbladder and biliary tract cancer | Healthcare access and quality index               | Female | 20-24 years | 95+ years | 2 | 2 |
| Gallbladder and biliary tract cancer | Healthcare access and quality index               | Male   | 20-24 years | 95+ years | 2 | 2 |
| Gallbladder and biliary tract cancer | LDI (I\$ per capita)                              | Female | 20-24 years | 95+ years | 3 | 3 |
| Gallbladder and biliary tract cancer | LDI (I\$ per capita)                              | Male   | 20-24 years | 95+ years | 3 | 3 |
| Gallbladder and biliary tract cancer | Liters of alcohol consumed per capita             | Female | 20-24 years | 95+ years | 2 | 2 |
| Gallbladder and biliary tract cancer | Liters of alcohol consumed per capita             | Male   | 20-24 years | 95+ years | 2 | 2 |
| Gallbladder and biliary tract cancer | Log-transformed SEV scalar: Gallblad C            | Female | 20-24 years | 95+ years | 1 | 1 |
| Gallbladder and biliary tract cancer | Log-transformed SEV scalar: Gallblad C            | Male   | 20-24 years | 95+ years | 1 | 1 |
| Gallbladder and biliary tract cancer | Mean BMI                                          | Female | 20-24 years | 95+ years | 1 | 1 |
| Gallbladder and biliary tract cancer | Mean BMI                                          | Male   | 20-24 years | 95+ years | 1 | 1 |
| Gallbladder and biliary tract cancer | Smoking Prevalence                                | Female | 20-24 years | 95+ years | 2 | 2 |
| Gallbladder and biliary tract cancer | Smoking Prevalence                                | Male   | 20-24 years | 95+ years | 2 | 2 |
| Gallbladder and biliary tract cancer | Socio-demographic Index                           | Female | 20-24 years | 95+ years | 3 | 3 |
| Gallbladder and biliary tract cancer | Socio-demographic Index                           | Male   | 20-24 years | 95+ years | 3 | 3 |
| Gallbladder and biliary tract cancer | Tobacco (cigarettes per capita)                   | Female | 20-24 years | 95+ years | 2 | 2 |
| Gallbladder and biliary tract cancer | Tobacco (cigarettes per capita)                   | Male   | 20-24 years | 95+ years | 2 | 2 |
| Hodgkin lymphoma                     | Education (years per capita)                      | Female | 1-4 years   | 95+ years | 3 | 3 |
| Hodgkin lymphoma                     | Education (years per capita)                      | Male   | 1-4 years   | 95+ years | 3 | 3 |
| Hodgkin lymphoma                     | Healthcare access and quality index               | Female | 1-4 years   | 95+ years | 2 | 2 |
| Hodgkin lymphoma                     | Healthcare access and quality index               | Male   | 1-4 years   | 95+ years | 2 | 2 |
| Hodgkin lymphoma                     | LDI (I\$ per capita)                              | Female | 1-4 years   | 95+ years | 3 | 3 |
| Hodgkin lymphoma                     | LDI (I\$ per capita)                              | Male   | 1-4 years   | 95+ years | 3 | 3 |
| Hodgkin lymphoma                     | Socio-demographic Index                           | Female | 1-4 years   | 95+ years | 3 | 3 |
| Hodgkin lymphoma                     | Socio-demographic Index                           | Male   | 1-4 years   | 95+ years | 3 | 3 |
| Kidney cancer                        | Cumulative Cigarettes (10 years)                  | Female | 0-6 days    | 95+ years | 2 | 1 |
| Kidney cancer                        | Cumulative Cigarettes (10 years)                  | Male   | 0-6 days    | 95+ years | 2 | 1 |

|               |                                                   |        |             |           |    |    |
|---------------|---------------------------------------------------|--------|-------------|-----------|----|----|
| Kidney cancer | Cumulative Cigarettes (5 years)                   | Female | 0-6 days    | 95+ years | 1  | NA |
| Kidney cancer | Cumulative Cigarettes (5 years)                   | Male   | 0-6 days    | 95+ years | 1  | NA |
| Kidney cancer | Cumulative Cigarettes (15 years)                  | Female | 0-6 days    | 95+ years | 1  | NA |
| Kidney cancer | Cumulative Cigarettes (15 years)                  | Male   | 0-6 days    | 95+ years | 1  | NA |
| Kidney cancer | Smoking Prevalence                                | Female | 0-6 days    | 95+ years | 2  | NA |
| Kidney cancer | Smoking Prevalence                                | Male   | 0-6 days    | 95+ years | 2  | NA |
| Kidney cancer | Diabetes Age-Standardized Prevalence (proportion) | Female | 0-6 days    | 95+ years | 2  | 2  |
| Kidney cancer | Diabetes Age-Standardized Prevalence (proportion) | Male   | 0-6 days    | 95+ years | 2  | 2  |
| Kidney cancer | Education (years per capita)                      | Female | 0-6 days    | 95+ years | 3  | 3  |
| Kidney cancer | Education (years per capita)                      | Male   | 0-6 days    | 95+ years | 3  | 3  |
| Kidney cancer | Healthcare access and quality index               | Female | 0-6 days    | 95+ years | 2  | 2  |
| Kidney cancer | Healthcare access and quality index               | Male   | 0-6 days    | 95+ years | 2  | 2  |
| Kidney cancer | LDI (I\$ per capita)                              | Female | 0-6 days    | 95+ years | 3  | 3  |
| Kidney cancer | LDI (I\$ per capita)                              | Male   | 0-6 days    | 95+ years | 3  | 3  |
| Kidney cancer | Liters of alcohol consumed per capita             | Female | 0-6 days    | 95+ years | 2  | 2  |
| Kidney cancer | Liters of alcohol consumed per capita             | Male   | 0-6 days    | 95+ years | 2  | 2  |
| Kidney cancer | Log-transformed SEV scalar: Kidney C              | Female | 0-6 days    | 95+ years | 1  | 1  |
| Kidney cancer | Log-transformed SEV scalar: Kidney C              | Male   | 0-6 days    | 95+ years | 1  | 1  |
| Kidney cancer | Mean BMI                                          | Female | 0-6 days    | 95+ years | 1  | 1  |
| Kidney cancer | Mean BMI                                          | Male   | 0-6 days    | 95+ years | 1  | 1  |
| Kidney cancer | Socio-demographic Index                           | Female | 0-6 days    | 95+ years | 3  | 3  |
| Kidney cancer | Socio-demographic Index                           | Male   | 0-6 days    | 95+ years | 3  | 3  |
| Kidney cancer | Systolic Blood Pressure (mmHg)                    | Female | 0-6 days    | 95+ years | 2  | 2  |
| Kidney cancer | Systolic Blood Pressure (mmHg)                    | Male   | 0-6 days    | 95+ years | 2  | 2  |
| Kidney cancer | Tobacco (cigarettes per capita)                   | Female | 0-6 days    | 95+ years | 2  | 1  |
| Kidney cancer | Tobacco (cigarettes per capita)                   | Male   | 0-6 days    | 95+ years | 2  | 1  |
| Larynx cancer | Age- and sex- specific SEV for low fruit          | Female | 20-24 years | 95+ years | NA | 3  |
| Larynx cancer | Age- and sex- specific SEV for low fruit          | Male   | 20-24 years | 95+ years | NA | 3  |

|               |                                                        |        |             |           |    |    |
|---------------|--------------------------------------------------------|--------|-------------|-----------|----|----|
| Larynx cancer | Age- and sex-specific SEV for Low vegetables           | Female | 20-24 years | 95+ years | NA | 2  |
| Larynx cancer | Age- and sex-specific SEV for Low vegetables           | Male   | 20-24 years | 95+ years | NA | 2  |
| Larynx cancer | Fruits adjusted (g)                                    | Female | 20-24 years | 95+ years | 2  | NA |
| Larynx cancer | Fruits adjusted (g)                                    | Male   | 20-24 years | 95+ years | 2  | NA |
| Larynx cancer | Vegetables adjusted (g)                                | Female | 20-24 years | 95+ years | 2  | NA |
| Larynx cancer | Vegetables adjusted (g)                                | Male   | 20-24 years | 95+ years | 2  | NA |
| Larynx cancer | Asbestos consumption (metric tons per year per capita) | Female | 20-24 years | 95+ years | NA | 2  |
| Larynx cancer | Asbestos consumption (metric tons per year per capita) | Male   | 20-24 years | 95+ years | NA | 2  |
| Larynx cancer | Cumulative Cigarettes (10 years)                       | Female | 20-24 years | 95+ years | 2  | 2  |
| Larynx cancer | Cumulative Cigarettes (10 years)                       | Male   | 20-24 years | 95+ years | 2  | 2  |
| Larynx cancer | Cumulative Cigarettes (20 years)                       | Female | 20-24 years | 95+ years | 2  | 2  |
| Larynx cancer | Cumulative Cigarettes (20 years)                       | Male   | 20-24 years | 95+ years | 2  | 2  |
| Larynx cancer | Cumulative Cigarettes (5 years)                        | Female | 20-24 years | 95+ years | 2  | NA |
| Larynx cancer | Cumulative Cigarettes (5 years)                        | Male   | 20-24 years | 95+ years | 2  | NA |
| Larynx cancer | Cumulative Cigarettes (15 years)                       | Female | 20-24 years | 95+ years | 2  | NA |
| Larynx cancer | Cumulative Cigarettes (15 years)                       | Male   | 20-24 years | 95+ years | 2  | NA |
| Larynx cancer | Education (years per capita)                           | Female | 20-24 years | 95+ years | 3  | NA |
| Larynx cancer | Education (years per capita)                           | Male   | 20-24 years | 95+ years | 3  | NA |
| Larynx cancer | Population Density (under 150 ppl/sqkm, proportion)    | Female | 20-24 years | 95+ years | 2  | NA |
| Larynx cancer | Population Density (under 150 ppl/sqkm, proportion)    | Male   | 20-24 years | 95+ years | 2  | NA |
| Larynx cancer | Healthcare access and quality index                    | Female | 20-24 years | 95+ years | 2  | 2  |
| Larynx cancer | Healthcare access and quality index                    | Male   | 20-24 years | 95+ years | 2  | 2  |
| Larynx cancer | LDI (I\$ per capita)                                   | Female | 20-24 years | 95+ years | 3  | 3  |
| Larynx cancer | LDI (I\$ per capita)                                   | Male   | 20-24 years | 95+ years | 3  | 3  |
| Larynx cancer | Liters of alcohol consumed per capita                  | Female | 20-24 years | 95+ years | 1  | 1  |
| Larynx cancer | Liters of alcohol consumed per capita                  | Male   | 20-24 years | 95+ years | 1  | 1  |
| Larynx cancer | Log-transformed SEV scalar: Larynx C                   | Female | 20-24 years | 95+ years | 1  | 1  |

|               |                                                       |        |             |           |   |    |
|---------------|-------------------------------------------------------|--------|-------------|-----------|---|----|
| Larynx cancer | Log-transformed SEV scalar: Larynx C                  | Male   | 20-24 years | 95+ years | 1 | 1  |
| Larynx cancer | Population Density (over 1000 ppl/sqkm, proportion)   | Female | 20-24 years | 95+ years | 2 | 2  |
| Larynx cancer | Population Density (over 1000 ppl/sqkm, proportion)   | Male   | 20-24 years | 95+ years | 2 | 2  |
| Larynx cancer | Smoking Prevalence                                    | Female | 20-24 years | 95+ years | 2 | 2  |
| Larynx cancer | Smoking Prevalence                                    | Male   | 20-24 years | 95+ years | 2 | 2  |
| Larynx cancer | Socio-demographic Index                               | Female | 20-24 years | 95+ years | 3 | 3  |
| Larynx cancer | Socio-demographic Index                               | Male   | 20-24 years | 95+ years | 3 | 3  |
| Leukemia      | Cumulative Cigarettes (10 years)                      | Female | 0-6 days    | 95+ years | 2 | 2  |
| Leukemia      | Cumulative Cigarettes (10 years)                      | Male   | 0-6 days    | 95+ years | 2 | 2  |
| Leukemia      | Cumulative Cigarettes (20 years)                      | Female | 0-6 days    | 95+ years | 2 | 2  |
| Leukemia      | Cumulative Cigarettes (20 years)                      | Male   | 0-6 days    | 95+ years | 2 | 2  |
| Leukemia      | Cumulative Cigarettes (5 years)                       | Female | 0-6 days    | 95+ years | 2 | NA |
| Leukemia      | Cumulative Cigarettes (5 years)                       | Male   | 0-6 days    | 95+ years | 2 | NA |
| Leukemia      | Cumulative Cigarettes (15 years)                      | Female | 0-6 days    | 95+ years | 2 | NA |
| Leukemia      | Cumulative Cigarettes (15 years)                      | Male   | 0-6 days    | 95+ years | 2 | NA |
| Leukemia      | Smoking Prevalence                                    | Female | 0-6 days    | 95+ years | 2 | NA |
| Leukemia      | Smoking Prevalence                                    | Male   | 0-6 days    | 95+ years | 2 | NA |
| Leukemia      | Education (years per capita)                          | Female | 0-6 days    | 95+ years | 3 | 3  |
| Leukemia      | Education (years per capita)                          | Male   | 0-6 days    | 95+ years | 3 | 3  |
| Leukemia      | Healthcare access and quality index                   | Female | 0-6 days    | 95+ years | 2 | 2  |
| Leukemia      | Healthcare access and quality index                   | Male   | 0-6 days    | 95+ years | 2 | 2  |
| Leukemia      | LDI (I\$ per capita)                                  | Female | 0-6 days    | 95+ years | 3 | 3  |
| Leukemia      | LDI (I\$ per capita)                                  | Male   | 0-6 days    | 95+ years | 3 | 3  |
| Leukemia      | Liters of alcohol consumed per capita                 | Female | 0-6 days    | 95+ years | 2 | 2  |
| Leukemia      | Liters of alcohol consumed per capita                 | Male   | 0-6 days    | 95+ years | 2 | 2  |
| Leukemia      | Log-transformed SEV scalar: Leukemia                  | Female | 0-6 days    | 95+ years | 1 | 1  |
| Leukemia      | Log-transformed SEV scalar: Leukemia                  | Male   | 0-6 days    | 95+ years | 1 | 1  |
| Leukemia      | Log-transformed age-standardized SEV scalar: Leukemia | Female | 0-6 days    | 95+ years | 1 | 1  |



|                            |                                                       |        |           |           |    |    |
|----------------------------|-------------------------------------------------------|--------|-----------|-----------|----|----|
| Leukemia                   | Log-transformed age-standardized SEV scalar: Leukemia | Male   | 0-6 days  | 95+ years | 1  | 1  |
| Leukemia                   | Mean BMI                                              | Female | 0-6 days  | 95+ years | NA | 2  |
| Leukemia                   | Mean BMI                                              | Male   | 0-6 days  | 95+ years | NA | 2  |
| Leukemia                   | Socio-demographic Index                               | Female | 0-6 days  | 95+ years | 3  | 3  |
| Leukemia                   | Socio-demographic Index                               | Male   | 0-6 days  | 95+ years | 3  | 3  |
| Leukemia                   | Tobacco (cigarettes per capita)                       | Female | 0-6 days  | 95+ years | 2  | 2  |
| Leukemia                   | Tobacco (cigarettes per capita)                       | Male   | 0-6 days  | 95+ years | 2  | 2  |
| Lip and oral cavity cancer | Age- and sex- specific SEV for low fruit              | Female | 5-9 years | 95+ years | NA | 2  |
| Lip and oral cavity cancer | Age- and sex- specific SEV for low fruit              | Male   | 5-9 years | 95+ years | NA | 2  |
| Lip and oral cavity cancer | Age- and sex-specific SEV for High red meat           | Female | 5-9 years | 95+ years | NA | 2  |
| Lip and oral cavity cancer | Age- and sex-specific SEV for High red meat           | Male   | 5-9 years | 95+ years | NA | 2  |
| Lip and oral cavity cancer | Age- and sex-specific SEV for Low vegetables          | Female | 5-9 years | 95+ years | NA | 2  |
| Lip and oral cavity cancer | Age- and sex-specific SEV for Low vegetables          | Male   | 5-9 years | 95+ years | NA | 2  |
| Lip and oral cavity cancer | Fruits adjusted (g)                                   | Female | 5-9 years | 95+ years | 2  | NA |
| Lip and oral cavity cancer | Fruits adjusted (g)                                   | Male   | 5-9 years | 95+ years | 2  | NA |
| Lip and oral cavity cancer | Red meats adjusted (g)                                | Female | 5-9 years | 95+ years | 2  | NA |
| Lip and oral cavity cancer | Red meats adjusted (g)                                | Male   | 5-9 years | 95+ years | 2  | NA |
| Lip and oral cavity cancer | Vegetables adjusted (g)                               | Female | 5-9 years | 95+ years | 1  | NA |
| Lip and oral cavity cancer | Vegetables adjusted (g)                               | Male   | 5-9 years | 95+ years | 1  | NA |
| Lip and oral cavity cancer | Cumulative Cigarettes (10 years)                      | Female | 5-9 years | 95+ years | 1  | 1  |
| Lip and oral cavity cancer | Cumulative Cigarettes (10 years)                      | Male   | 5-9 years | 95+ years | 1  | 1  |
| Lip and oral cavity cancer | Cumulative Cigarettes (20 years)                      | Female | 5-9 years | 95+ years | 1  | 1  |
| Lip and oral cavity cancer | Cumulative Cigarettes (20 years)                      | Male   | 5-9 years | 95+ years | 1  | 1  |
| Lip and oral cavity cancer | Cumulative Cigarettes (5 years)                       | Female | 5-9 years | 95+ years | 1  | NA |
| Lip and oral cavity cancer | Cumulative Cigarettes (5 years)                       | Male   | 5-9 years | 95+ years | 1  | NA |
| Lip and oral cavity cancer | Cumulative Cigarettes (15 years)                      | Female | 5-9 years | 95+ years | 1  | NA |
| Lip and oral cavity cancer | Cumulative Cigarettes (15 years)                      | Male   | 5-9 years | 95+ years | 1  | NA |
| Lip and oral cavity cancer | Smoking Prevalence                                    | Female | 5-9 years | 95+ years | 1  | NA |
| Lip and oral cavity cancer | Smoking Prevalence                                    | Male   | 5-9 years | 95+ years | 1  | NA |

|                            |                                             |        |           |           |    |    |
|----------------------------|---------------------------------------------|--------|-----------|-----------|----|----|
| Lip and oral cavity cancer | Health System Access 2 (unitless)           | Female | 5-9 years | 95+ years | 2  | NA |
| Lip and oral cavity cancer | Education (years per capita)                | Female | 5-9 years | 95+ years | 3  | 3  |
| Lip and oral cavity cancer | Education (years per capita)                | Male   | 5-9 years | 95+ years | 3  | 3  |
| Lip and oral cavity cancer | Healthcare access and quality index         | Female | 5-9 years | 95+ years | 2  | 2  |
| Lip and oral cavity cancer | Healthcare access and quality index         | Male   | 5-9 years | 95+ years | 2  | 2  |
| Lip and oral cavity cancer | LDI (I\$ per capita)                        | Female | 5-9 years | 95+ years | 3  | 3  |
| Lip and oral cavity cancer | LDI (I\$ per capita)                        | Male   | 5-9 years | 95+ years | 3  | 3  |
| Lip and oral cavity cancer | Liters of alcohol consumed per capita       | Female | 5-9 years | 95+ years | 1  | 1  |
| Lip and oral cavity cancer | Liters of alcohol consumed per capita       | Male   | 5-9 years | 95+ years | 1  | 1  |
| Lip and oral cavity cancer | Log-transformed SEV scalar: Lip oral C      | Female | 5-9 years | 95+ years | 1  | 1  |
| Lip and oral cavity cancer | Log-transformed SEV scalar: Lip oral C      | Male   | 5-9 years | 95+ years | 1  | 1  |
| Lip and oral cavity cancer | Socio-demographic Index                     | Female | 5-9 years | 95+ years | 3  | 3  |
| Lip and oral cavity cancer | Socio-demographic Index                     | Male   | 5-9 years | 95+ years | 3  | 3  |
| Lip and oral cavity cancer | Tobacco (cigarettes per capita)             | Female | 5-9 years | 95+ years | 1  | 1  |
| Lip and oral cavity cancer | Tobacco (cigarettes per capita)             | Male   | 5-9 years | 95+ years | 1  | 1  |
| Liver cancer               | Age- and sex-specific SEV for High red meat | Female | 0-6 days  | 95+ years | NA | 3  |
| Liver cancer               | Age- and sex-specific SEV for High red meat | Male   | 0-6 days  | 95+ years | NA | 3  |
| Liver cancer               | Red meats adjusted (g)                      | Female | 0-6 days  | 95+ years | 2  | NA |
| Liver cancer               | Red meats adjusted (g)                      | Male   | 0-6 days  | 95+ years | 2  | NA |
| Liver cancer               | Cumulative Cigarettes (20 years)            | Female | 0-6 days  | 95+ years | 2  | 2  |
| Liver cancer               | Cumulative Cigarettes (20 years)            | Male   | 0-6 days  | 95+ years | 2  | 2  |
| Liver cancer               | Cumulative Cigarettes (10 years)            | Female | 0-6 days  | 95+ years | 2  | NA |
| Liver cancer               | Cumulative Cigarettes (10 years)            | Male   | 0-6 days  | 95+ years | 2  | NA |
| Liver cancer               | Cumulative Cigarettes (5 years)             | Female | 0-6 days  | 95+ years | 2  | NA |
| Liver cancer               | Cumulative Cigarettes (5 years)             | Male   | 0-6 days  | 95+ years | 2  | NA |
| Liver cancer               | Cumulative Cigarettes (15 years)            | Female | 0-6 days  | 95+ years | 2  | NA |
| Liver cancer               | Cumulative Cigarettes (15 years)            | Male   | 0-6 days  | 95+ years | 2  | NA |
| Liver cancer               | Diabetes Fasting Plasma Glucose (mmol/L)    | Female | 0-6 days  | 95+ years | 2  | NA |
| Liver cancer               | Diabetes Fasting Plasma Glucose (mmol/L)    | Male   | 0-6 days  | 95+ years | 2  | NA |

|              |                                                                |        |          |           |    |    |
|--------------|----------------------------------------------------------------|--------|----------|-----------|----|----|
| Liver cancer | Diabetes Age-Standardized Prevalence (proportion)              | Female | 0-6 days | 95+ years | 2  | NA |
| Liver cancer | Diabetes Age-Standardized Prevalence (proportion)              | Male   | 0-6 days | 95+ years | 2  | NA |
| Liver cancer | Diabetes Fasting Plasma Glucose (mmol/L), age-standardized 25+ | Female | 0-6 days | 95+ years | NA | 2  |
| Liver cancer | Diabetes Fasting Plasma Glucose (mmol/L), age-standardized 25+ | Male   | 0-6 days | 95+ years | NA | 2  |
| Liver cancer | Education (years per capita)                                   | Female | 0-6 days | 95+ years | 3  | 3  |
| Liver cancer | Education (years per capita)                                   | Male   | 0-6 days | 95+ years | 3  | 3  |
| Liver cancer | HIV age-standardized prevalence                                | Female | 0-6 days | 95+ years | 1  | 1  |
| Liver cancer | HIV age-standardized prevalence                                | Male   | 0-6 days | 95+ years | 1  | 1  |
| Liver cancer | Healthcare access and quality index                            | Female | 0-6 days | 95+ years | 2  | 2  |
| Liver cancer | Healthcare access and quality index                            | Male   | 0-6 days | 95+ years | 2  | 2  |
| Liver cancer | Hepatitis B 3-dose coverage (proportion)                       | Female | 0-6 days | 95+ years | 2  | 2  |
| Liver cancer | Hepatitis B 3-dose coverage (proportion)                       | Male   | 0-6 days | 95+ years | 2  | 2  |
| Liver cancer | Hepatitis B Seroprevalence (HBsAg) age standardized            | Female | 0-6 days | 95+ years | NA | 1  |
| Liver cancer | Hepatitis B Seroprevalence (HBsAg) age standardized            | Male   | 0-6 days | 95+ years | NA | 1  |
| Liver cancer | Hepatitis B (HBsAg) Seroprevalence                             | Female | 0-6 days | 95+ years | 1  | NA |
| Liver cancer | Hepatitis B (HBsAg) Seroprevalence                             | Male   | 0-6 days | 95+ years | 1  | NA |
| Liver cancer | Hepatitis B vaccine coverage (proportion), aged through time   | Female | 0-6 days | 95+ years | NA | 2  |
| Liver cancer | Hepatitis B vaccine coverage (proportion), aged through time   | Male   | 0-6 days | 95+ years | NA | 2  |
| Liver cancer | Hepatitis B 3-dose coverage (proportion), lagged 5 years       | Female | 0-6 days | 95+ years | 2  | NA |
| Liver cancer | Hepatitis B 3-dose coverage (proportion), lagged 5 years       | Male   | 0-6 days | 95+ years | 2  | NA |
| Liver cancer | Hepatitis B 3-dose coverage (proportion), lagged 10 years      | Female | 0-6 days | 95+ years | 2  | NA |

|                         |                                                           |        |          |           |    |    |
|-------------------------|-----------------------------------------------------------|--------|----------|-----------|----|----|
| Liver cancer            | Hepatitis B 3-dose coverage (proportion), lagged 10 years | Male   | 0-6 days | 95+ years | 2  | NA |
| Liver cancer            | Hepatitis C Seroprevalence (anti-HCV) age standardized    | Female | 0-6 days | 95+ years | NA | 1  |
| Liver cancer            | Hepatitis C Seroprevalence (anti-HCV) age standardized    | Male   | 0-6 days | 95+ years | NA | 1  |
| Liver cancer            | Hepatitis C (IgG) Seroprevalence                          | Female | 0-6 days | 95+ years | 1  | NA |
| Liver cancer            | Hepatitis C (IgG) Seroprevalence                          | Male   | 0-6 days | 95+ years | 1  | NA |
| Liver cancer            | Intravenous drug use (age-standardized proportion)        | Female | 0-6 days | 95+ years | NA | 2  |
| Liver cancer            | Intravenous drug use (age-standardized proportion)        | Male   | 0-6 days | 95+ years | NA | 2  |
| Liver cancer            | LDI (I\$ per capita)                                      | Female | 0-6 days | 95+ years | 3  | 3  |
| Liver cancer            | LDI (I\$ per capita)                                      | Male   | 0-6 days | 95+ years | 3  | 3  |
| Liver cancer            | Liters of alcohol consumed per capita                     | Female | 0-6 days | 95+ years | 1  | 1  |
| Liver cancer            | Liters of alcohol consumed per capita                     | Male   | 0-6 days | 95+ years | 1  | 1  |
| Liver cancer            | Log-transformed SEV scalar: Liver C                       | Female | 0-6 days | 95+ years | 1  | 1  |
| Liver cancer            | Log-transformed SEV scalar: Liver C                       | Male   | 0-6 days | 95+ years | 1  | 1  |
| Liver cancer            | Mean BMI                                                  | Female | 0-6 days | 95+ years | 2  | 2  |
| Liver cancer            | Mean BMI                                                  | Male   | 0-6 days | 95+ years | 2  | 2  |
| Liver cancer            | Socio-demographic Index                                   | Female | 0-6 days | 95+ years | 3  | 3  |
| Liver cancer            | Socio-demographic Index                                   | Male   | 0-6 days | 95+ years | 3  | 3  |
| Liver cancer            | Tobacco (cigarettes per capita)                           | Female | 0-6 days | 95+ years | 2  | 2  |
| Liver cancer            | Tobacco (cigarettes per capita)                           | Male   | 0-6 days | 95+ years | 2  | 2  |
| Malignant skin melanoma | Education (years per capita)                              | Female | 0-6 days | 95+ years | 3  | 3  |
| Malignant skin melanoma | Education (years per capita)                              | Male   | 0-6 days | 95+ years | 3  | 3  |
| Malignant skin melanoma | Healthcare access and quality index                       | Female | 0-6 days | 95+ years | 2  | 2  |
| Malignant skin melanoma | Healthcare access and quality index                       | Male   | 0-6 days | 95+ years | 2  | 2  |
| Malignant skin melanoma | LDI (I\$ per capita)                                      | Female | 0-6 days | 95+ years | 3  | 3  |
| Malignant skin melanoma | LDI (I\$ per capita)                                      | Male   | 0-6 days | 95+ years | 3  | 3  |
| Malignant skin melanoma | Latitude 15 to 30 (proportion)                            | Female | 0-6 days | 95+ years | 2  | 2  |

|                         |                                                        |        |             |           |   |    |
|-------------------------|--------------------------------------------------------|--------|-------------|-----------|---|----|
| Malignant skin melanoma | Latitude 15 to 30 (proportion)                         | Male   | 0-6 days    | 95+ years | 2 | 2  |
| Malignant skin melanoma | Latitude 30 to 45 (proportion)                         | Female | 0-6 days    | 95+ years | 2 | 2  |
| Malignant skin melanoma | Latitude 30 to 45 (proportion)                         | Male   | 0-6 days    | 95+ years | 2 | 2  |
| Malignant skin melanoma | Latitude Over 45 (proportion)                          | Female | 0-6 days    | 95+ years | 2 | 2  |
| Malignant skin melanoma | Latitude Over 45 (proportion)                          | Male   | 0-6 days    | 95+ years | 2 | 2  |
| Malignant skin melanoma | Latitude Under 15 (proportion)                         | Female | 0-6 days    | 95+ years | 2 | 2  |
| Malignant skin melanoma | Latitude Under 15 (proportion)                         | Male   | 0-6 days    | 95+ years | 2 | 2  |
| Malignant skin melanoma | Liters of alcohol consumed per capita                  | Female | 0-6 days    | 95+ years | 1 | 1  |
| Malignant skin melanoma | Liters of alcohol consumed per capita                  | Male   | 0-6 days    | 95+ years | 1 | 1  |
| Malignant skin melanoma | Socio-demographic Index                                | Female | 0-6 days    | 95+ years | 3 | 3  |
| Malignant skin melanoma | Socio-demographic Index                                | Male   | 0-6 days    | 95+ years | 3 | 3  |
| Malignant skin melanoma | Fruits adjusted (g)                                    | Female | 0-6 days    | 95+ years | 2 | NA |
| Malignant skin melanoma | Fruits adjusted (g)                                    | Male   | 0-6 days    | 95+ years | 2 | NA |
| Malignant skin melanoma | Vegetables adjusted (g)                                | Female | 0-6 days    | 95+ years | 2 | NA |
| Malignant skin melanoma | Vegetables adjusted (g)                                | Male   | 0-6 days    | 95+ years | 2 | NA |
| Mesothelioma            | Asbestos consumption (metric tons per year per capita) | Female | 20-24 years | 95+ years | 1 | 1  |
| Mesothelioma            | Asbestos consumption (metric tons per year per capita) | Male   | 20-24 years | 95+ years | 1 | 1  |
| Mesothelioma            | Asbestos production (binary)                           | Female | 20-24 years | 95+ years | 1 | NA |
| Mesothelioma            | Asbestos production (binary)                           | Male   | 20-24 years | 95+ years | 1 | NA |
| Mesothelioma            | Asbestos production (kg) per capita                    | Female | 20-24 years | 95+ years | 2 | NA |
| Mesothelioma            | Asbestos production (kg) per capita                    | Male   | 20-24 years | 95+ years | 2 | NA |
| Mesothelioma            | Cumulative Cigarettes (5 Years)                        | Female | 20-24 years | 95+ years | 1 | 2  |
| Mesothelioma            | Cumulative Cigarettes (5 Years)                        | Male   | 20-24 years | 95+ years | 1 | 2  |
| Mesothelioma            | Education (years per capita)                           | Female | 20-24 years | 95+ years | 3 | 3  |
| Mesothelioma            | Education (years per capita)                           | Male   | 20-24 years | 95+ years | 3 | 3  |
| Mesothelioma            | Gold production (binary)                               | Female | 20-24 years | 95+ years | 2 | 2  |
| Mesothelioma            | Gold production (binary)                               | Male   | 20-24 years | 95+ years | 2 | 2  |
| Mesothelioma            | Gold production (kg) per capita                        | Female | 20-24 years | 95+ years | 2 | NA |

|                  |                                                       |        |             |           |    |    |
|------------------|-------------------------------------------------------|--------|-------------|-----------|----|----|
| Mesothelioma     | Gold production (kg) per capita                       | Male   | 20-24 years | 95+ years | 2  | NA |
| Mesothelioma     | Healthcare access and quality index                   | Female | 20-24 years | 95+ years | 2  | 2  |
| Mesothelioma     | Healthcare access and quality index                   | Male   | 20-24 years | 95+ years | 2  | 2  |
| Mesothelioma     | Indoor Air Pollution (All Cooking Fuels)              | Female | 20-24 years | 95+ years | 1  | 2  |
| Mesothelioma     | Indoor Air Pollution (All Cooking Fuels)              | Male   | 20-24 years | 95+ years | 1  | 2  |
| Mesothelioma     | LDI (I\$ per capita)                                  | Female | 20-24 years | 95+ years | 3  | 3  |
| Mesothelioma     | LDI (I\$ per capita)                                  | Male   | 20-24 years | 95+ years | 3  | 3  |
| Mesothelioma     | Log-transformed SEV scalar: Mesothel                  | Male   | 20-24 years | 95+ years | NA | 1  |
| Mesothelioma     | Log-transformed age-standardized SEV scalar: Mesothel | Male   | 20-24 years | 95+ years | NA | 1  |
| Mesothelioma     | Population Density (over 1000 ppl/sqkm, proportion)   | Female | 20-24 years | 95+ years | 2  | 2  |
| Mesothelioma     | Population Density (over 1000 ppl/sqkm, proportion)   | Male   | 20-24 years | 95+ years | 2  | 2  |
| Mesothelioma     | Smoking Prevalence                                    | Female | 20-24 years | 95+ years | 1  | 1  |
| Mesothelioma     | Smoking Prevalence                                    | Male   | 20-24 years | 95+ years | 1  | 1  |
| Mesothelioma     | Socio-demographic Index                               | Female | 20-24 years | 95+ years | 3  | 3  |
| Mesothelioma     | Socio-demographic Index                               | Male   | 20-24 years | 95+ years | 3  | 3  |
| Multiple myeloma | Age- and sex- specific SEV for low fruit              | Female | 20-24 years | 95+ years | NA | 2  |
| Multiple myeloma | Age- and sex- specific SEV for low fruit              | Male   | 20-24 years | 95+ years | NA | 2  |
| Multiple myeloma | Age- and sex-specific SEV for High red meat           | Female | 20-24 years | 95+ years | NA | 2  |
| Multiple myeloma | Age- and sex-specific SEV for High red meat           | Male   | 20-24 years | 95+ years | NA | 2  |
| Multiple myeloma | Age- and sex-specific SEV for Low vegetables          | Female | 20-24 years | 95+ years | NA | 2  |
| Multiple myeloma | Age- and sex-specific SEV for Low vegetables          | Male   | 20-24 years | 95+ years | NA | 2  |
| Multiple myeloma | Fruits adjusted (g)                                   | Female | 20-24 years | 95+ years | 2  | NA |
| Multiple myeloma | Fruits adjusted (g)                                   | Male   | 20-24 years | 95+ years | 2  | NA |
| Multiple myeloma | Red meats adjusted (g)                                | Female | 20-24 years | 95+ years | 2  | NA |
| Multiple myeloma | Red meats adjusted (g)                                | Male   | 20-24 years | 95+ years | 2  | NA |
| Multiple myeloma | Vegetables adjusted (g)                               | Female | 20-24 years | 95+ years | 2  | NA |
| Multiple myeloma | Vegetables adjusted (g)                               | Male   | 20-24 years | 95+ years | 2  | NA |
| Multiple myeloma | Education (years per capita)                          | Female | 20-24 years | 95+ years | 3  | 3  |

|                    |                                                |        |             |           |    |    |
|--------------------|------------------------------------------------|--------|-------------|-----------|----|----|
| Multiple myeloma   | Education (years per capita)                   | Male   | 20-24 years | 95+ years | 3  | 3  |
| Multiple myeloma   | Healthcare access and quality index            | Female | 20-24 years | 95+ years | 2  | 2  |
| Multiple myeloma   | Healthcare access and quality index            | Male   | 20-24 years | 95+ years | 2  | 2  |
| Multiple myeloma   | Improved Water Source (proportion with access) | Female | 20-24 years | 95+ years | 2  | 2  |
| Multiple myeloma   | Improved Water Source (proportion with access) | Male   | 20-24 years | 95+ years | 2  | 2  |
| Multiple myeloma   | LDI (I\$ per capita)                           | Female | 20-24 years | 95+ years | 3  | 3  |
| Multiple myeloma   | LDI (I\$ per capita)                           | Male   | 20-24 years | 95+ years | 3  | 3  |
| Multiple myeloma   | Liters of alcohol consumed per capita          | Female | 20-24 years | 95+ years | 1  | 1  |
| Multiple myeloma   | Liters of alcohol consumed per capita          | Male   | 20-24 years | 95+ years | 1  | 1  |
| Multiple myeloma   | Mean BMI                                       | Female | 20-24 years | 95+ years | 2  | 2  |
| Multiple myeloma   | Mean BMI                                       | Male   | 20-24 years | 95+ years | 2  | 2  |
| Multiple myeloma   | Sanitation (proportion with access)            | Female | 20-24 years | 95+ years | 2  | 2  |
| Multiple myeloma   | Sanitation (proportion with access)            | Male   | 20-24 years | 95+ years | 2  | 2  |
| Multiple myeloma   | Smoking Prevalence                             | Female | 20-24 years | 95+ years | 1  | 1  |
| Multiple myeloma   | Smoking Prevalence                             | Male   | 20-24 years | 95+ years | 1  | 1  |
| Multiple myeloma   | Socio-demographic Index                        | Female | 20-24 years | 95+ years | 3  | 3  |
| Multiple myeloma   | Socio-demographic Index                        | Male   | 20-24 years | 95+ years | 3  | 3  |
| Multiple myeloma   | Tobacco (cigarettes per capita)                | Female | 20-24 years | 95+ years | 1  | 1  |
| Multiple myeloma   | Tobacco (cigarettes per capita)                | Male   | 20-24 years | 95+ years | 1  | 1  |
| Nasopharynx cancer | Age- and sex- specific SEV for low fruit       | Female | 5-9 years   | 95+ years | NA | 3  |
| Nasopharynx cancer | Age- and sex- specific SEV for low fruit       | Male   | 5-9 years   | 95+ years | NA | 3  |
| Nasopharynx cancer | Age- and sex-specific SEV for Low vegetables   | Female | 5-9 years   | 95+ years | NA | 2  |
| Nasopharynx cancer | Age- and sex-specific SEV for Low vegetables   | Male   | 5-9 years   | 95+ years | NA | 2  |
| Nasopharynx cancer | Fruits adjusted (g)                            | Female | 5-9 years   | 95+ years | 2  | NA |
| Nasopharynx cancer | Fruits adjusted (g)                            | Male   | 5-9 years   | 95+ years | 2  | NA |
| Nasopharynx cancer | Vegetables adjusted (g)                        | Female | 5-9 years   | 95+ years | 2  | NA |
| Nasopharynx cancer | Vegetables adjusted (g)                        | Male   | 5-9 years   | 95+ years | 2  | NA |
| Nasopharynx cancer | Cumulative Cigarettes (10 years)               | Female | 5-9 years   | 95+ years | 1  | 1  |

|                    |                                                     |        |           |           |   |    |
|--------------------|-----------------------------------------------------|--------|-----------|-----------|---|----|
| Nasopharynx cancer | Cumulative Cigarettes (10 years)                    | Male   | 5-9 years | 95+ years | 1 | 1  |
| Nasopharynx cancer | Cumulative Cigarettes (20 years)                    | Female | 5-9 years | 95+ years | 1 | 1  |
| Nasopharynx cancer | Cumulative Cigarettes (20 years)                    | Male   | 5-9 years | 95+ years | 1 | 1  |
| Nasopharynx cancer | Cumulative Cigarettes (5 years)                     | Female | 5-9 years | 95+ years | 1 | NA |
| Nasopharynx cancer | Cumulative Cigarettes (5 years)                     | Male   | 5-9 years | 95+ years | 1 | NA |
| Nasopharynx cancer | Cumulative Cigarettes (15 years)                    | Female | 5-9 years | 95+ years | 1 | NA |
| Nasopharynx cancer | Cumulative Cigarettes (15 years)                    | Male   | 5-9 years | 95+ years | 1 | NA |
| Nasopharynx cancer | Education (years per capita)                        | Female | 5-9 years | 95+ years | 3 | 3  |
| Nasopharynx cancer | Education (years per capita)                        | Male   | 5-9 years | 95+ years | 3 | 3  |
| Nasopharynx cancer | Healthcare access and quality index                 | Female | 5-9 years | 95+ years | 2 | 2  |
| Nasopharynx cancer | Healthcare access and quality index                 | Male   | 5-9 years | 95+ years | 2 | 2  |
| Nasopharynx cancer | LDI (I\$ per capita)                                | Female | 5-9 years | 95+ years | 3 | 3  |
| Nasopharynx cancer | LDI (I\$ per capita)                                | Male   | 5-9 years | 95+ years | 3 | 3  |
| Nasopharynx cancer | Liters of alcohol consumed per capita               | Female | 5-9 years | 95+ years | 1 | 1  |
| Nasopharynx cancer | Liters of alcohol consumed per capita               | Male   | 5-9 years | 95+ years | 1 | 1  |
| Nasopharynx cancer | Log-transformed SEV scalar: Nasoph C                | Female | 5-9 years | 95+ years | 1 | 1  |
| Nasopharynx cancer | Log-transformed SEV scalar: Nasoph C                | Male   | 5-9 years | 95+ years | 1 | 1  |
| Nasopharynx cancer | Smoking Prevalence                                  | Female | 5-9 years | 95+ years | 1 | NA |
| Nasopharynx cancer | Smoking Prevalence                                  | Male   | 5-9 years | 95+ years | 1 | NA |
| Nasopharynx cancer | Population Density (under 150 ppl/sqkm, proportion) | Female | 5-9 years | 95+ years | 2 | NA |
| Nasopharynx cancer | Population Density (under 150 ppl/sqkm, proportion) | Male   | 5-9 years | 95+ years | 2 | NA |
| Nasopharynx cancer | Population Density (over 1000 ppl/sqkm, proportion) | Female | 5-9 years | 95+ years | 2 | 2  |
| Nasopharynx cancer | Population Density (over 1000 ppl/sqkm, proportion) | Male   | 5-9 years | 95+ years | 2 | 2  |
| Nasopharynx cancer | Socio-demographic Index                             | Female | 5-9 years | 95+ years | 3 | 3  |
| Nasopharynx cancer | Socio-demographic Index                             | Male   | 5-9 years | 95+ years | 3 | 3  |
| Nasopharynx cancer | Tobacco (cigarettes per capita)                     | Female | 5-9 years | 95+ years | 1 | 1  |
| Nasopharynx cancer | Tobacco (cigarettes per capita)                     | Male   | 5-9 years | 95+ years | 1 | 1  |



|                          |                                       |        |             |           |    |   |
|--------------------------|---------------------------------------|--------|-------------|-----------|----|---|
| Non-Hodgkin lymphoma     | Cumulative Cigarettes (10 years)      | Female | 1-4 years   | 95+ years | 2  | 2 |
| Non-Hodgkin lymphoma     | Cumulative Cigarettes (10 years)      | Male   | 1-4 years   | 95+ years | 2  | 2 |
| Non-Hodgkin lymphoma     | Cumulative Cigarettes (15 years)      | Female | 1-4 years   | 95+ years | 2  | 2 |
| Non-Hodgkin lymphoma     | Cumulative Cigarettes (15 years)      | Male   | 1-4 years   | 95+ years | 2  | 2 |
| Non-Hodgkin lymphoma     | Cumulative Cigarettes (20 years)      | Female | 1-4 years   | 95+ years | 2  | 2 |
| Non-Hodgkin lymphoma     | Cumulative Cigarettes (20 years)      | Male   | 1-4 years   | 95+ years | 2  | 2 |
| Non-Hodgkin lymphoma     | Cumulative Cigarettes (5 Years)       | Female | 1-4 years   | 95+ years | 2  | 2 |
| Non-Hodgkin lymphoma     | Cumulative Cigarettes (5 Years)       | Male   | 1-4 years   | 95+ years | 2  | 2 |
| Non-Hodgkin lymphoma     | Healthcare access and quality index   | Female | 1-4 years   | 95+ years | 2  | 2 |
| Non-Hodgkin lymphoma     | Healthcare access and quality index   | Male   | 1-4 years   | 95+ years | 2  | 2 |
| Non-Hodgkin lymphoma     | LDI (I\$ per capita)                  | Female | 1-4 years   | 95+ years | 3  | 3 |
| Non-Hodgkin lymphoma     | LDI (I\$ per capita)                  | Male   | 1-4 years   | 95+ years | 3  | 3 |
| Non-Hodgkin lymphoma     | Liters of alcohol consumed per capita | Female | 1-4 years   | 95+ years | 2  | 2 |
| Non-Hodgkin lymphoma     | Liters of alcohol consumed per capita | Male   | 1-4 years   | 95+ years | 2  | 2 |
| Non-Hodgkin lymphoma     | Mean BMI                              | Female | 1-4 years   | 95+ years | NA | 2 |
| Non-Hodgkin lymphoma     | Mean BMI                              | Male   | 1-4 years   | 95+ years | NA | 2 |
| Non-Hodgkin lymphoma     | Smoking Prevalence                    | Female | 1-4 years   | 95+ years | 2  | 2 |
| Non-Hodgkin lymphoma     | Smoking Prevalence                    | Male   | 1-4 years   | 95+ years | 2  | 2 |
| Non-Hodgkin lymphoma     | Socio-demographic Index               | Female | 1-4 years   | 95+ years | 3  | 3 |
| Non-Hodgkin lymphoma     | Socio-demographic Index               | Male   | 1-4 years   | 95+ years | 3  | 3 |
| Non-Hodgkin lymphoma     | Total Fertility Rate                  | Female | 1-4 years   | 95+ years | 3  | 3 |
| Non-melanoma skin cancer | Average latitude                      | Female | 20-24 years | 95+ years | 2  | 2 |
| Non-melanoma skin cancer | Average latitude                      | Male   | 20-24 years | 95+ years | 2  | 2 |
| Non-melanoma skin cancer | Cumulative Cigarettes (10 years)      | Female | 20-24 years | 95+ years | 1  | 1 |
| Non-melanoma skin cancer | Cumulative Cigarettes (10 years)      | Male   | 20-24 years | 95+ years | 1  | 1 |
| Non-melanoma skin cancer | Cumulative Cigarettes (15 years)      | Female | 20-24 years | 95+ years | 1  | 1 |
| Non-melanoma skin cancer | Cumulative Cigarettes (15 years)      | Male   | 20-24 years | 95+ years | 1  | 1 |
| Non-melanoma skin cancer | Cumulative Cigarettes (5 years)       | Female | 20-24 years | 95+ years | 1  | 1 |
| Non-melanoma skin cancer | Cumulative Cigarettes (5 years)       | Male   | 20-24 years | 95+ years | 1  | 1 |
| Non-melanoma skin cancer | Education (years per capita)          | Female | 20-24 years | 95+ years | 3  | 3 |

|                                                    |                                     |        |             |           |   |   |
|----------------------------------------------------|-------------------------------------|--------|-------------|-----------|---|---|
| Non-melanoma skin cancer                           | Education (years per capita)        | Male   | 20-24 years | 95+ years | 3 | 3 |
| Non-melanoma skin cancer                           | Healthcare access and quality index | Female | 20-24 years | 95+ years | 2 | 2 |
| Non-melanoma skin cancer                           | Healthcare access and quality index | Male   | 20-24 years | 95+ years | 2 | 2 |
| Non-melanoma skin cancer                           | LDI (I\$ per capita)                | Female | 20-24 years | 95+ years | 3 | 3 |
| Non-melanoma skin cancer                           | LDI (I\$ per capita)                | Male   | 20-24 years | 95+ years | 3 | 3 |
| Non-melanoma skin cancer                           | Smoking Prevalence                  | Female | 20-24 years | 95+ years | 1 | 1 |
| Non-melanoma skin cancer                           | Smoking Prevalence                  | Male   | 20-24 years | 95+ years | 1 | 1 |
| Non-melanoma skin cancer                           | Socio-demographic Index             | Female | 20-24 years | 95+ years | 3 | 3 |
| Non-melanoma skin cancer                           | Socio-demographic Index             | Male   | 20-24 years | 95+ years | 3 | 3 |
| Non-melanoma skin cancer (squamous-cell carcinoma) | Average latitude                    | Female | 20-24 years | 95+ years | 2 | 2 |
| Non-melanoma skin cancer (squamous-cell carcinoma) | Average latitude                    | Male   | 20-24 years | 95+ years | 2 | 2 |
| Non-melanoma skin cancer (squamous-cell carcinoma) | Cumulative Cigarettes (10 years)    | Female | 20-24 years | 95+ years | 1 | 1 |
| Non-melanoma skin cancer (squamous-cell carcinoma) | Cumulative Cigarettes (10 years)    | Male   | 20-24 years | 95+ years | 1 | 1 |
| Non-melanoma skin cancer (squamous-cell carcinoma) | Cumulative Cigarettes (15 years)    | Female | 20-24 years | 95+ years | 1 | 1 |
| Non-melanoma skin cancer (squamous-cell carcinoma) | Cumulative Cigarettes (15 years)    | Male   | 20-24 years | 95+ years | 1 | 1 |
| Non-melanoma skin cancer (squamous-cell carcinoma) | Cumulative Cigarettes (5 years)     | Female | 20-24 years | 95+ years | 1 | 1 |
| Non-melanoma skin cancer (squamous-cell carcinoma) | Cumulative Cigarettes (5 years)     | Male   | 20-24 years | 95+ years | 1 | 1 |
| Non-melanoma skin cancer (squamous-cell carcinoma) | Education (years per capita)        | Female | 20-24 years | 95+ years | 3 | 3 |
| Non-melanoma skin cancer (squamous-cell carcinoma) | Education (years per capita)        | Male   | 20-24 years | 95+ years | 3 | 3 |
| Non-melanoma skin cancer (squamous-cell carcinoma) | Healthcare access and quality index | Female | 20-24 years | 95+ years | 2 | 2 |

|                                                    |                                       |        |             |           |   |    |
|----------------------------------------------------|---------------------------------------|--------|-------------|-----------|---|----|
| Non-melanoma skin cancer (squamous-cell carcinoma) | Healthcare access and quality index   | Male   | 20-24 years | 95+ years | 2 | 2  |
| Non-melanoma skin cancer (squamous-cell carcinoma) | LDI (I\$ per capita)                  | Female | 20-24 years | 95+ years | 3 | 3  |
| Non-melanoma skin cancer (squamous-cell carcinoma) | LDI (I\$ per capita)                  | Male   | 20-24 years | 95+ years | 3 | 3  |
| Non-melanoma skin cancer (squamous-cell carcinoma) | Smoking Prevalence                    | Female | 20-24 years | 95+ years | 1 | 1  |
| Non-melanoma skin cancer (squamous-cell carcinoma) | Smoking Prevalence                    | Male   | 20-24 years | 95+ years | 1 | 1  |
| Non-melanoma skin cancer (squamous-cell carcinoma) | Socio-demographic Index               | Female | 20-24 years | 95+ years | 3 | 3  |
| Non-melanoma skin cancer (squamous-cell carcinoma) | Socio-demographic Index               | Male   | 20-24 years | 95+ years | 3 | 3  |
| Other leukemia                                     | Cumulative Cigarettes (10 years)      | Female | 0-6 days    | 95+ years | 2 | 2  |
| Other leukemia                                     | Cumulative Cigarettes (10 years)      | Male   | 0-6 days    | 95+ years | 2 | 2  |
| Other leukemia                                     | Cumulative Cigarettes (20 years)      | Female | 0-6 days    | 95+ years | 2 | 2  |
| Other leukemia                                     | Cumulative Cigarettes (20 years)      | Male   | 0-6 days    | 95+ years | 2 | 2  |
| Other leukemia                                     | Cumulative Cigarettes (15 years)      | Female | 0-6 days    | 95+ years | 2 | NA |
| Other leukemia                                     | Cumulative Cigarettes (15 years)      | Male   | 0-6 days    | 95+ years | 2 | NA |
| Other leukemia                                     | Cumulative Cigarettes (5 years)       | Female | 0-6 days    | 95+ years | 2 | NA |
| Other leukemia                                     | Cumulative Cigarettes (5 years)       | Male   | 0-6 days    | 95+ years | 2 | NA |
| Other leukemia                                     | Smoking Prevalence                    | Female | 0-6 days    | 95+ years | 2 | NA |
| Other leukemia                                     | Smoking Prevalence                    | Male   | 0-6 days    | 95+ years | 2 | NA |
| Other leukemia                                     | Education (years per capita)          | Female | 0-6 days    | 95+ years | 3 | 3  |
| Other leukemia                                     | Education (years per capita)          | Male   | 0-6 days    | 95+ years | 3 | 3  |
| Other leukemia                                     | Healthcare access and quality index   | Female | 0-6 days    | 95+ years | 2 | 2  |
| Other leukemia                                     | Healthcare access and quality index   | Male   | 0-6 days    | 95+ years | 2 | 2  |
| Other leukemia                                     | LDI (I\$ per capita)                  | Female | 0-6 days    | 95+ years | 3 | 3  |
| Other leukemia                                     | LDI (I\$ per capita)                  | Male   | 0-6 days    | 95+ years | 3 | 3  |
| Other leukemia                                     | Liters of alcohol consumed per capita | Female | 0-6 days    | 95+ years | 2 | 2  |

|                           |                                                       |        |          |           |    |    |
|---------------------------|-------------------------------------------------------|--------|----------|-----------|----|----|
| Other leukemia            | Liters of alcohol consumed per capita                 | Male   | 0-6 days | 95+ years | 2  | 2  |
| Other leukemia            | Log-transformed SEV scalar: Leukemia                  | Female | 0-6 days | 95+ years | 1  | 1  |
| Other leukemia            | Log-transformed SEV scalar: Leukemia                  | Male   | 0-6 days | 95+ years | 1  | 1  |
| Other leukemia            | Log-transformed age-standardized SEV scalar: Leukemia | Female | 0-6 days | 95+ years | 1  | 1  |
| Other leukemia            | Log-transformed age-standardized SEV scalar: Leukemia | Male   | 0-6 days | 95+ years | 1  | 1  |
| Other leukemia            | Mean BMI                                              | Female | 0-6 days | 95+ years | NA | 2  |
| Other leukemia            | Mean BMI                                              | Male   | 0-6 days | 95+ years | NA | 2  |
| Other leukemia            | Socio-demographic Index                               | Female | 0-6 days | 95+ years | 3  | 3  |
| Other leukemia            | Socio-demographic Index                               | Male   | 0-6 days | 95+ years | 3  | 3  |
| Other leukemia            | Tobacco (cigarettes per capita)                       | Female | 0-6 days | 95+ years | 2  | 2  |
| Other leukemia            | Tobacco (cigarettes per capita)                       | Male   | 0-6 days | 95+ years | 2  | 2  |
| Other malignant neoplasms | Age- and sex- specific SEV for low fruit              | Female | 0-6 days | 95+ years | NA | 2  |
| Other malignant neoplasms | Age- and sex- specific SEV for low fruit              | Male   | 0-6 days | 95+ years | NA | 2  |
| Other malignant neoplasms | Age- and sex-specific SEV for Low nuts and seeds      | Female | 0-6 days | 95+ years | NA | 2  |
| Other malignant neoplasms | Age- and sex-specific SEV for Low nuts and seeds      | Male   | 0-6 days | 95+ years | NA | 2  |
| Other malignant neoplasms | Age- and sex-specific SEV for Low vegetables          | Female | 0-6 days | 95+ years | NA | 2  |
| Other malignant neoplasms | Age- and sex-specific SEV for Low vegetables          | Male   | 0-6 days | 95+ years | NA | 2  |
| Other malignant neoplasms | Fruits adjusted (g)                                   | Female | 0-6 days | 95+ years | 2  | NA |
| Other malignant neoplasms | Fruits adjusted (g)                                   | Male   | 0-6 days | 95+ years | 2  | NA |
| Other malignant neoplasms | Nuts seeds adjusted (g)                               | Female | 0-6 days | 95+ years | 2  | NA |
| Other malignant neoplasms | Nuts seeds adjusted (g)                               | Male   | 0-6 days | 95+ years | 2  | NA |
| Other malignant neoplasms | Vegetables adjusted (g)                               | Female | 0-6 days | 95+ years | 2  | NA |
| Other malignant neoplasms | Vegetables adjusted (g)                               | Male   | 0-6 days | 95+ years | 2  | NA |
| Other malignant neoplasms | Education (years per capita)                          | Female | 0-6 days | 95+ years | 3  | 3  |
| Other malignant neoplasms | Education (years per capita)                          | Male   | 0-6 days | 95+ years | 3  | 3  |
| Other malignant neoplasms | Healthcare access and quality index                   | Female | 0-6 days | 95+ years | 2  | 2  |
| Other malignant neoplasms | Healthcare access and quality index                   | Male   | 0-6 days | 95+ years | 2  | 2  |

|                           |                                              |        |             |           |    |    |
|---------------------------|----------------------------------------------|--------|-------------|-----------|----|----|
| Other malignant neoplasms | LDI (I\$ per capita)                         | Female | 0-6 days    | 95+ years | 3  | 3  |
| Other malignant neoplasms | LDI (I\$ per capita)                         | Male   | 0-6 days    | 95+ years | 3  | 3  |
| Other malignant neoplasms | Smoking Prevalence                           | Female | 0-6 days    | 95+ years | 1  | 1  |
| Other malignant neoplasms | Smoking Prevalence                           | Male   | 0-6 days    | 95+ years | 1  | 1  |
| Other malignant neoplasms | Socio-demographic Index                      | Female | 0-6 days    | 95+ years | 3  | 3  |
| Other malignant neoplasms | Socio-demographic Index                      | Male   | 0-6 days    | 95+ years | 3  | 3  |
| Other malignant neoplasms | Tobacco (cigarettes per capita)              | Female | 0-6 days    | 95+ years | 1  | 1  |
| Other malignant neoplasms | Tobacco (cigarettes per capita)              | Male   | 0-6 days    | 95+ years | 1  | 1  |
| Other malignant neoplasms | PUFA adjusted(percent)                       | Female | 0-6 days    | 95+ years | 2  | 2  |
| Other malignant neoplasms | PUFA adjusted(percent)                       | Male   | 0-6 days    | 95+ years | 2  | 2  |
| Other pharynx cancer      | Age- and sex- specific SEV for low fruit     | Female | 20-24 years | 95+ years | NA | 2  |
| Other pharynx cancer      | Age- and sex- specific SEV for low fruit     | Male   | 20-24 years | 95+ years | NA | 2  |
| Other pharynx cancer      | Age- and sex-specific SEV for Low vegetables | Female | 20-24 years | 95+ years | NA | 2  |
| Other pharynx cancer      | Age- and sex-specific SEV for Low vegetables | Male   | 20-24 years | 95+ years | NA | 2  |
| Other pharynx cancer      | Fruits adjusted (g)                          | Female | 20-24 years | 95+ years | 2  | NA |
| Other pharynx cancer      | Fruits adjusted (g)                          | Male   | 20-24 years | 95+ years | 2  | NA |
| Other pharynx cancer      | Vegetables adjusted (g)                      | Female | 20-24 years | 95+ years | 2  | NA |
| Other pharynx cancer      | Vegetables adjusted (g)                      | Male   | 20-24 years | 95+ years | 2  | NA |
| Other pharynx cancer      | Cumulative Cigarettes (5 years)              | Female | 20-24 years | 95+ years | 2  | 2  |
| Other pharynx cancer      | Cumulative Cigarettes (5 years)              | Male   | 20-24 years | 95+ years | 2  | 2  |
| Other pharynx cancer      | Education (years per capita)                 | Female | 20-24 years | 95+ years | 3  | 3  |
| Other pharynx cancer      | Education (years per capita)                 | Male   | 20-24 years | 95+ years | 3  | 3  |
| Other pharynx cancer      | Healthcare access and quality index          | Female | 20-24 years | 95+ years | 2  | 2  |
| Other pharynx cancer      | Healthcare access and quality index          | Male   | 20-24 years | 95+ years | 2  | 2  |
| Other pharynx cancer      | LDI (I\$ per capita)                         | Female | 20-24 years | 95+ years | 3  | 3  |
| Other pharynx cancer      | LDI (I\$ per capita)                         | Male   | 20-24 years | 95+ years | 3  | 3  |
| Other pharynx cancer      | Liters of alcohol consumed per capita        | Female | 20-24 years | 95+ years | 1  | 1  |
| Other pharynx cancer      | Liters of alcohol consumed per capita        | Male   | 20-24 years | 95+ years | 1  | 1  |
| Other pharynx cancer      | Log-transformed SEV scalar: Oth Phar C       | Female | 20-24 years | 95+ years | 1  | 1  |
| Other pharynx cancer      | Log-transformed SEV scalar: Oth Phar C       | Male   | 20-24 years | 95+ years | 1  | 1  |

|                      |                                                        |        |             |           |    |    |
|----------------------|--------------------------------------------------------|--------|-------------|-----------|----|----|
| Other pharynx cancer | Population Density (over 1000 ppl/sqkm, proportion)    | Female | 20-24 years | 95+ years | 2  | 2  |
| Other pharynx cancer | Population Density (over 1000 ppl/sqkm, proportion)    | Male   | 20-24 years | 95+ years | 2  | 2  |
| Other pharynx cancer | Population Density (under 150 ppl/sqkm, proportion)    | Female | 20-24 years | 95+ years | 2  | 2  |
| Other pharynx cancer | Population Density (under 150 ppl/sqkm, proportion)    | Male   | 20-24 years | 95+ years | 2  | 2  |
| Other pharynx cancer | Smoking Prevalence                                     | Female | 20-24 years | 95+ years | 1  | 1  |
| Other pharynx cancer | Smoking Prevalence                                     | Male   | 20-24 years | 95+ years | 1  | 1  |
| Other pharynx cancer | Socio-demographic Index                                | Female | 20-24 years | 95+ years | 3  | 3  |
| Other pharynx cancer | Socio-demographic Index                                | Male   | 20-24 years | 95+ years | 3  | 3  |
| Ovarian cancer       | Age- and sex- specific SEV for low fruit               | Female | 5-9 years   | 95+ years | NA | 3  |
| Ovarian cancer       | Age- and sex-specific SEV for Low vegetables           | Female | 5-9 years   | 95+ years | NA | 3  |
| Ovarian cancer       | Fruits adjusted (g)                                    | Female | 5-9 years   | 95+ years | 2  | NA |
| Ovarian cancer       | Vegetables adjusted (g)                                | Female | 5-9 years   | 95+ years | 2  | NA |
| Ovarian cancer       | Asbestos consumption (metric tons per year per capita) | Female | 5-9 years   | 95+ years | NA | 2  |
| Ovarian cancer       | Contraception (Modern) Prevalence (proportion)         | Female | 5-9 years   | 95+ years | 1  | 2  |
| Ovarian cancer       | Cumulative Cigarettes (10 years)                       | Female | 5-9 years   | 95+ years | 1  | 2  |
| Ovarian cancer       | Cumulative Cigarettes (20 years)                       | Female | 5-9 years   | 95+ years | 1  | 2  |
| Ovarian cancer       | Cumulative Cigarettes (5 years)                        | Female | 5-9 years   | 95+ years | 1  | NA |
| Ovarian cancer       | Cumulative Cigarettes (15 years)                       | Female | 5-9 years   | 95+ years | 1  | NA |
| Ovarian cancer       | Tobacco (cigarettes per capita)                        | Female | 5-9 years   | 95+ years | 1  | NA |
| Ovarian cancer       | Diabetes Age-Standardized Prevalence (proportion)      | Female | 5-9 years   | 95+ years | 2  | 2  |
| Ovarian cancer       | Education (years per capita)                           | Female | 5-9 years   | 95+ years | 3  | 3  |
| Ovarian cancer       | Healthcare access and quality index                    | Female | 5-9 years   | 95+ years | 2  | 2  |
| Ovarian cancer       | LDI (I\$ per capita)                                   | Female | 5-9 years   | 95+ years | 3  | 3  |
| Ovarian cancer       | Liters of alcohol consumed per capita                  | Female | 5-9 years   | 95+ years | 1  | 1  |

|                   |                                                   |        |             |           |    |    |
|-------------------|---------------------------------------------------|--------|-------------|-----------|----|----|
| Ovarian cancer    | Log-transformed SEV scalar: Ovary C               | Female | 5-9 years   | 95+ years | 1  | 1  |
| Ovarian cancer    | Mean BMI                                          | Female | 5-9 years   | 95+ years | 2  | 2  |
| Ovarian cancer    | Smoking Prevalence                                | Female | 5-9 years   | 95+ years | 2  | 2  |
| Ovarian cancer    | Socio-demographic Index                           | Female | 5-9 years   | 95+ years | 3  | 3  |
| Ovarian cancer    | Total Fertility Rate                              | Female | 5-9 years   | 95+ years | 2  | 2  |
| Ovarian cancer    | energy unadjusted(kcal)                           | Female | 5-9 years   | 95+ years | 2  | 2  |
| Pancreatic cancer | Age- and sex- specific SEV for low fruit          | Female | 15-19 years | 95+ years | NA | 3  |
| Pancreatic cancer | Age- and sex- specific SEV for low fruit          | Male   | 15-19 years | 95+ years | NA | 3  |
| Pancreatic cancer | Age- and sex-specific SEV for High red meat       | Female | 15-19 years | 95+ years | NA | 2  |
| Pancreatic cancer | Age- and sex-specific SEV for High red meat       | Male   | 15-19 years | 95+ years | NA | 2  |
| Pancreatic cancer | Age- and sex-specific SEV for Low vegetables      | Female | 15-19 years | 95+ years | NA | 3  |
| Pancreatic cancer | Age- and sex-specific SEV for Low vegetables      | Male   | 15-19 years | 95+ years | NA | 3  |
| Pancreatic cancer | Fruits adjusted (g)                               | Female | 15-19 years | 95+ years | 2  | NA |
| Pancreatic cancer | Fruits adjusted (g)                               | Male   | 15-19 years | 95+ years | 2  | NA |
| Pancreatic cancer | Red meats adjusted (g)                            | Female | 15-19 years | 95+ years | 2  | NA |
| Pancreatic cancer | Red meats adjusted (g)                            | Male   | 15-19 years | 95+ years | 2  | NA |
| Pancreatic cancer | Vegetables adjusted (g)                           | Female | 15-19 years | 95+ years | 2  | NA |
| Pancreatic cancer | Vegetables adjusted (g)                           | Male   | 15-19 years | 95+ years | 2  | NA |
| Pancreatic cancer | Cumulative Cigarettes (10 years)                  | Female | 15-19 years | 95+ years | 1  | 1  |
| Pancreatic cancer | Cumulative Cigarettes (10 years)                  | Male   | 15-19 years | 95+ years | 1  | 1  |
| Pancreatic cancer | Cumulative Cigarettes (20 years)                  | Female | 15-19 years | 95+ years | 1  | 1  |
| Pancreatic cancer | Cumulative Cigarettes (20 years)                  | Male   | 15-19 years | 95+ years | 1  | 1  |
| Pancreatic cancer | Cumulative Cigarettes (15 years)                  | Female | 15-19 years | 95+ years | 1  | NA |
| Pancreatic cancer | Cumulative Cigarettes (15 years)                  | Male   | 15-19 years | 95+ years | 1  | NA |
| Pancreatic cancer | Cumulative Cigarettes (5 years)                   | Female | 15-19 years | 95+ years | 1  | NA |
| Pancreatic cancer | Cumulative Cigarettes (5 years)                   | Male   | 15-19 years | 95+ years | 1  | NA |
| Pancreatic cancer | Smoking Prevalence                                | Female | 15-19 years | 95+ years | 1  | NA |
| Pancreatic cancer | Smoking Prevalence                                | Male   | 15-19 years | 95+ years | 1  | NA |
| Pancreatic cancer | Diabetes Age-Standardized Prevalence (proportion) | Female | 15-19 years | 95+ years | 2  | 2  |

|                   |                                                                |        |             |           |    |   |
|-------------------|----------------------------------------------------------------|--------|-------------|-----------|----|---|
| Pancreatic cancer | Diabetes Age-Standardized Prevalence (proportion)              | Male   | 15-19 years | 95+ years | 2  | 2 |
| Pancreatic cancer | Diabetes Fasting Plasma Glucose (mmol/L), age-standardized 25+ | Female | 15-19 years | 95+ years | NA | 2 |
| Pancreatic cancer | Diabetes Fasting Plasma Glucose (mmol/L), age-standardized 25+ | Male   | 15-19 years | 95+ years | NA | 2 |
| Pancreatic cancer | Education (years per capita)                                   | Female | 15-19 years | 95+ years | 3  | 3 |
| Pancreatic cancer | Education (years per capita)                                   | Male   | 15-19 years | 95+ years | 3  | 3 |
| Pancreatic cancer | Healthcare access and quality index                            | Female | 15-19 years | 95+ years | 2  | 2 |
| Pancreatic cancer | Healthcare access and quality index                            | Male   | 15-19 years | 95+ years | 2  | 2 |
| Pancreatic cancer | LDI (I\$ per capita)                                           | Female | 15-19 years | 95+ years | 3  | 3 |
| Pancreatic cancer | LDI (I\$ per capita)                                           | Male   | 15-19 years | 95+ years | 3  | 3 |
| Pancreatic cancer | Liters of alcohol consumed per capita                          | Female | 15-19 years | 95+ years | 1  | 2 |
| Pancreatic cancer | Liters of alcohol consumed per capita                          | Male   | 15-19 years | 95+ years | 1  | 2 |
| Pancreatic cancer | Log-transformed SEV scalar: Pancreas C                         | Female | 15-19 years | 95+ years | 1  | 1 |
| Pancreatic cancer | Log-transformed SEV scalar: Pancreas C                         | Male   | 15-19 years | 95+ years | 1  | 1 |
| Pancreatic cancer | Mean BMI                                                       | Female | 15-19 years | 95+ years | 1  | 1 |
| Pancreatic cancer | Mean BMI                                                       | Male   | 15-19 years | 95+ years | 1  | 1 |
| Pancreatic cancer | Socio-demographic Index                                        | Female | 15-19 years | 95+ years | 3  | 3 |
| Pancreatic cancer | Socio-demographic Index                                        | Male   | 15-19 years | 95+ years | 3  | 3 |
| Pancreatic cancer | Tobacco (cigarettes per capita)                                | Female | 15-19 years | 95+ years | 1  | 1 |
| Pancreatic cancer | Tobacco (cigarettes per capita)                                | Male   | 15-19 years | 95+ years | 1  | 1 |
| Pancreatic cancer | energy unadjusted(kcal)                                        | Female | 15-19 years | 95+ years | 2  | 2 |
| Pancreatic cancer | energy unadjusted(kcal)                                        | Male   | 15-19 years | 95+ years | 2  | 2 |
| Prostate cancer   | Education (years per capita)                                   | Male   | 20-24 years | 95+ years | 3  | 3 |
| Prostate cancer   | Healthcare access and quality index                            | Male   | 20-24 years | 95+ years | 2  | 2 |
| Prostate cancer   | LDI (I\$ per capita)                                           | Male   | 20-24 years | 95+ years | 3  | 3 |
| Prostate cancer   | Log-transformed SEV scalar: Prostate C                         | Male   | 20-24 years | 95+ years | 1  | 1 |
| Prostate cancer   | Smoking Prevalence                                             | Male   | 20-24 years | 95+ years | NA | 2 |
| Prostate cancer   | Socio-demographic Index                                        | Male   | 20-24 years | 95+ years | 3  | 3 |
| Stomach cancer    | Age- and sex- specific SEV for low fruit                       | Female | 15-19 years | 95+ years | NA | 3 |



|                |                                                 |        |             |           |    |    |
|----------------|-------------------------------------------------|--------|-------------|-----------|----|----|
| Stomach cancer | Age- and sex- specific SEV for low fruit        | Male   | 15-19 years | 95+ years | NA | 3  |
| Stomach cancer | Age- and sex-specific SEV for Low vegetables    | Female | 15-19 years | 95+ years | NA | 3  |
| Stomach cancer | Age- and sex-specific SEV for Low vegetables    | Male   | 15-19 years | 95+ years | NA | 3  |
| Stomach cancer | Fruits adjusted (g)                             | Female | 15-19 years | 95+ years | 2  | NA |
| Stomach cancer | Fruits adjusted (g)                             | Male   | 15-19 years | 95+ years | 2  | NA |
| Stomach cancer | Vegetables adjusted (g)                         | Female | 15-19 years | 95+ years | 2  | NA |
| Stomach cancer | Vegetables adjusted (g)                         | Male   | 15-19 years | 95+ years | 2  | NA |
| Stomach cancer | Age- and sex-specific SEV for Unsafe sanitation | Female | 15-19 years | 95+ years | NA | 2  |
| Stomach cancer | Age- and sex-specific SEV for Unsafe sanitation | Male   | 15-19 years | 95+ years | NA | 2  |
| Stomach cancer | Age- and sex-specific SEV for Unsafe water      | Female | 15-19 years | 95+ years | NA | 2  |
| Stomach cancer | Age- and sex-specific SEV for Unsafe water      | Male   | 15-19 years | 95+ years | NA | 2  |
| Stomach cancer | SEV unsafe water                                | Female | 15-19 years | 95+ years | 1  | NA |
| Stomach cancer | SEV unsafe water                                | Male   | 15-19 years | 95+ years | 1  | NA |
| Stomach cancer | SEV unsafe sanitation                           | Female | 15-19 years | 95+ years | 1  | NA |
| Stomach cancer | SEV unsafe sanitation                           | Male   | 15-19 years | 95+ years | 1  | NA |
| Stomach cancer | Smoking Prevalence                              | Female | 15-19 years | 95+ years | 1  | NA |
| Stomach cancer | Smoking Prevalence                              | Male   | 15-19 years | 95+ years | 1  | NA |
| Stomach cancer | Cumulative Cigarettes (15 years)                | Female | 15-19 years | 95+ years | 1  | NA |
| Stomach cancer | Cumulative Cigarettes (15 years)                | Male   | 15-19 years | 95+ years | 1  | NA |
| Stomach cancer | Cumulative Cigarettes (5 years)                 | Female | 15-19 years | 95+ years | 1  | NA |
| Stomach cancer | Cumulative Cigarettes (5 years)                 | Male   | 15-19 years | 95+ years | 1  | NA |
| Stomach cancer | Cumulative Cigarettes (10 years)                | Female | 15-19 years | 95+ years | 1  | NA |
| Stomach cancer | Cumulative Cigarettes (10 years)                | Male   | 15-19 years | 95+ years | 1  | NA |
| Stomach cancer | Cumulative Cigarettes (20 years)                | Female | 15-19 years | 95+ years | 1  | 2  |
| Stomach cancer | Cumulative Cigarettes (20 years)                | Male   | 15-19 years | 95+ years | 1  | 2  |
| Stomach cancer | Diet high in sodium                             | Female | 15-19 years | 95+ years | 1  | 1  |
| Stomach cancer | Diet high in sodium                             | Male   | 15-19 years | 95+ years | 1  | 1  |
| Stomach cancer | Education (years per capita)                    | Female | 15-19 years | 95+ years | 3  | 3  |

|                   |                                                |        |             |           |    |    |
|-------------------|------------------------------------------------|--------|-------------|-----------|----|----|
| Stomach cancer    | Education (years per capita)                   | Male   | 15-19 years | 95+ years | 3  | 3  |
| Stomach cancer    | Healthcare access and quality index            | Female | 15-19 years | 95+ years | 2  | 2  |
| Stomach cancer    | Healthcare access and quality index            | Male   | 15-19 years | 95+ years | 2  | 2  |
| Stomach cancer    | Improved Water Source (proportion with access) | Female | 15-19 years | 95+ years | 2  | 2  |
| Stomach cancer    | Improved Water Source (proportion with access) | Male   | 15-19 years | 95+ years | 2  | 2  |
| Stomach cancer    | LDI (I\$ per capita)                           | Female | 15-19 years | 95+ years | 3  | 3  |
| Stomach cancer    | LDI (I\$ per capita)                           | Male   | 15-19 years | 95+ years | 3  | 3  |
| Stomach cancer    | Log-transformed SEV scalar: Stomach C          | Female | 15-19 years | 95+ years | 1  | 1  |
| Stomach cancer    | Log-transformed SEV scalar: Stomach C          | Male   | 15-19 years | 95+ years | 1  | 1  |
| Stomach cancer    | Mean BMI                                       | Female | 15-19 years | 95+ years | 2  | 2  |
| Stomach cancer    | Mean BMI                                       | Male   | 15-19 years | 95+ years | 2  | 2  |
| Stomach cancer    | Sanitation (proportion with access)            | Female | 15-19 years | 95+ years | 2  | 2  |
| Stomach cancer    | Sanitation (proportion with access)            | Male   | 15-19 years | 95+ years | 2  | 2  |
| Stomach cancer    | Socio-demographic Index                        | Female | 15-19 years | 95+ years | 3  | 3  |
| Stomach cancer    | Socio-demographic Index                        | Male   | 15-19 years | 95+ years | 3  | 3  |
| Stomach cancer    | Tobacco (cigarettes per capita)                | Female | 15-19 years | 95+ years | 1  | 1  |
| Stomach cancer    | Tobacco (cigarettes per capita)                | Male   | 15-19 years | 95+ years | 1  | 1  |
| Testicular cancer | Age- and sex- specific SEV for low fruit       | Male   | 0-6 days    | 95+ years | NA | 2  |
| Testicular cancer | Age- and sex-specific SEV for Low vegetables   | Male   | 0-6 days    | 95+ years | NA | 2  |
| Testicular cancer | Fruits adjusted (g)                            | Male   | 0-6 days    | 95+ years | 2  | NA |
| Testicular cancer | Vegetables adjusted (g)                        | Male   | 0-6 days    | 95+ years | 2  | NA |
| Testicular cancer | Cumulative Cigarettes (10 years)               | Male   | 0-6 days    | 95+ years | 2  | 2  |
| Testicular cancer | Cumulative Cigarettes (15 Years)               | Male   | 0-6 days    | 95+ years | 2  | 2  |
| Testicular cancer | Cumulative Cigarettes (20 years)               | Male   | 0-6 days    | 95+ years | 2  | 2  |
| Testicular cancer | Cumulative Cigarettes (5 Years)                | Male   | 0-6 days    | 95+ years | 2  | 2  |
| Testicular cancer | Education (years per capita)                   | Male   | 0-6 days    | 95+ years | 3  | 3  |
| Testicular cancer | Healthcare access and quality index            | Male   | 0-6 days    | 95+ years | 2  | 2  |
| Testicular cancer | LDI (I\$ per capita)                           | Male   | 0-6 days    | 95+ years | 3  | 3  |

|                   |                                                |        |           |           |    |    |
|-------------------|------------------------------------------------|--------|-----------|-----------|----|----|
| Testicular cancer | Smoking Prevalence                             | Male   | 0-6 days  | 95+ years | 2  | 2  |
| Testicular cancer | Socio-demographic Index                        | Male   | 0-6 days  | 95+ years | 3  | 3  |
| Testicular cancer | Tobacco (cigarettes per capita)                | Male   | 0-6 days  | 95+ years | 2  | 2  |
| Thyroid cancer    | Age- and sex- specific SEV for low fruit       | Female | 5-9 years | 95+ years | NA | 3  |
| Thyroid cancer    | Age- and sex- specific SEV for low fruit       | Male   | 5-9 years | 95+ years | NA | 3  |
| Thyroid cancer    | Age- and sex-specific SEV for High red meat    | Female | 5-9 years | 95+ years | NA | 2  |
| Thyroid cancer    | Age- and sex-specific SEV for High red meat    | Male   | 5-9 years | 95+ years | NA | 2  |
| Thyroid cancer    | Age- and sex-specific SEV for Low vegetables   | Female | 5-9 years | 95+ years | NA | 2  |
| Thyroid cancer    | Age- and sex-specific SEV for Low vegetables   | Male   | 5-9 years | 95+ years | NA | 2  |
| Thyroid cancer    | Fruits adjusted (g)                            | Female | 5-9 years | 95+ years | 2  | NA |
| Thyroid cancer    | Fruits adjusted (g)                            | Male   | 5-9 years | 95+ years | 2  | NA |
| Thyroid cancer    | Red meats adjusted (g)                         | Female | 5-9 years | 95+ years | 2  | NA |
| Thyroid cancer    | Red meats adjusted (g)                         | Male   | 5-9 years | 95+ years | 2  | NA |
| Thyroid cancer    | Vegetables adjusted (g)                        | Female | 5-9 years | 95+ years | 2  | NA |
| Thyroid cancer    | Vegetables adjusted (g)                        | Male   | 5-9 years | 95+ years | 2  | NA |
| Thyroid cancer    | Education (years per capita)                   | Female | 5-9 years | 95+ years | 3  | 3  |
| Thyroid cancer    | Education (years per capita)                   | Male   | 5-9 years | 95+ years | 3  | 3  |
| Thyroid cancer    | Healthcare access and quality index            | Female | 5-9 years | 95+ years | 2  | 2  |
| Thyroid cancer    | Healthcare access and quality index            | Male   | 5-9 years | 95+ years | 2  | 2  |
| Thyroid cancer    | Improved Water Source (proportion with access) | Female | 5-9 years | 95+ years | 2  | 3  |
| Thyroid cancer    | Improved Water Source (proportion with access) | Male   | 5-9 years | 95+ years | 2  | 3  |
| Thyroid cancer    | LDI (I\$ per capita)                           | Female | 5-9 years | 95+ years | 3  | 3  |
| Thyroid cancer    | LDI (I\$ per capita)                           | Male   | 5-9 years | 95+ years | 3  | 3  |
| Thyroid cancer    | Liters of alcohol consumed per capita          | Female | 5-9 years | 95+ years | 1  | 1  |
| Thyroid cancer    | Liters of alcohol consumed per capita          | Male   | 5-9 years | 95+ years | 1  | 1  |
| Thyroid cancer    | Log-transformed SEV scalar: Thyroid C          | Female | 5-9 years | 95+ years | 1  | 1  |
| Thyroid cancer    | Log-transformed SEV scalar: Thyroid C          | Male   | 5-9 years | 95+ years | 1  | 1  |
| Thyroid cancer    | Mean BMI                                       | Female | 5-9 years | 95+ years | 2  | 2  |

|                                     |                                                                |        |            |           |    |    |
|-------------------------------------|----------------------------------------------------------------|--------|------------|-----------|----|----|
| Thyroid cancer                      | Mean BMI                                                       | Male   | 5-9 years  | 95+ years | 2  | 2  |
| Thyroid cancer                      | Sanitation (proportion with access)                            | Female | 5-9 years  | 95+ years | 2  | 3  |
| Thyroid cancer                      | Sanitation (proportion with access)                            | Male   | 5-9 years  | 95+ years | 2  | 3  |
| Thyroid cancer                      | Socio-demographic Index                                        | Female | 5-9 years  | 95+ years | 3  | 3  |
| Thyroid cancer                      | Socio-demographic Index                                        | Male   | 5-9 years  | 95+ years | 3  | 3  |
| Thyroid cancer                      | Smoking Prevalence                                             | Female | 5-9 years  | 95+ years | 1  | NA |
| Thyroid cancer                      | Smoking Prevalence                                             | Male   | 5-9 years  | 95+ years | 1  | NA |
| Thyroid cancer                      | Tobacco (cigarettes per capita)                                | Female | 5-9 years  | 95+ years | 2  | 2  |
| Thyroid cancer                      | Tobacco (cigarettes per capita)                                | Male   | 5-9 years  | 95+ years | 2  | 2  |
| Tracheal, bronchus, and lung cancer | Asbestos consumption (metric tons per year per capita)         | Female | 10-14 year | 95+ years | NA | 1  |
| Tracheal, bronchus, and lung cancer | Asbestos consumption (metric tons per year per capita)         | Male   | 10-14 year | 95+ years | NA | 1  |
| Tracheal, bronchus, and lung cancer | Cumulative Cigarettes (10 years)                               | Female | 10-14 year | 95+ years | 1  | 2  |
| Tracheal, bronchus, and lung cancer | Cumulative Cigarettes (10 years)                               | Male   | 10-14 year | 95+ years | 1  | 2  |
| Tracheal, bronchus, and lung cancer | Cumulative Cigarettes (20 years)                               | Female | 10-14 year | 95+ years | 1  | 2  |
| Tracheal, bronchus, and lung cancer | Cumulative Cigarettes (20 years)                               | Male   | 10-14 year | 95+ years | 1  | 2  |
| Tracheal, bronchus, and lung cancer | Cumulative Cigarettes (15 years)                               | Female | 10-14 year | 95+ years | 1  | NA |
| Tracheal, bronchus, and lung cancer | Cumulative Cigarettes (15 years)                               | Male   | 10-14 year | 95+ years | 1  | NA |
| Tracheal, bronchus, and lung cancer | Cumulative Cigarettes (5 years)                                | Female | 10-14 year | 95+ years | 1  | NA |
| Tracheal, bronchus, and lung cancer | Cumulative Cigarettes (5 years)                                | Male   | 10-14 year | 95+ years | 1  | NA |
| Tracheal, bronchus, and lung cancer | Tobacco (cigarettes per capita)                                | Female | 10-14 year | 95+ years | 1  | NA |
| Tracheal, bronchus, and lung cancer | Tobacco (cigarettes per capita)                                | Male   | 10-14 year | 95+ years | 1  | NA |
| Tracheal, bronchus, and lung cancer | Diabetes Fasting Plasma Glucose (mmol/L), age-standardized 25+ | Female | 10-14 year | 95+ years | NA | 2  |
| Tracheal, bronchus, and lung cancer | Diabetes Fasting Plasma Glucose (mmol/L), age-standardized 25+ | Male   | 10-14 year | 95+ years | NA | 2  |
| Tracheal, bronchus, and lung cancer | Education (years per capita)                                   | Female | 10-14 year | 95+ years | 3  | 3  |
| Tracheal, bronchus, and lung cancer | Education (years per capita)                                   | Male   | 10-14 year | 95+ years | 3  | 3  |
| Tracheal, bronchus, and lung cancer | Healthcare access and quality index                            | Female | 10-14 year | 95+ years | 2  | 2  |
| Tracheal, bronchus, and lung cancer | Healthcare access and quality index                            | Male   | 10-14 year | 95+ years | 2  | 2  |

|                                     |                                                     |        |             |           |    |    |
|-------------------------------------|-----------------------------------------------------|--------|-------------|-----------|----|----|
| Tracheal, bronchus, and lung cancer | Indoor Air Pollution (All Cooking Fuels)            | Female | 10-14 year  | 95+ years | 2  | 2  |
| Tracheal, bronchus, and lung cancer | Indoor Air Pollution (All Cooking Fuels)            | Male   | 10-14 year  | 95+ years | 2  | 2  |
| Tracheal, bronchus, and lung cancer | LDI (I\$ per capita)                                | Female | 10-14 year  | 95+ years | 3  | 3  |
| Tracheal, bronchus, and lung cancer | LDI (I\$ per capita)                                | Male   | 10-14 year  | 95+ years | 3  | 3  |
| Tracheal, bronchus, and lung cancer | Log-transformed SEV scalar: Lung C                  | Female | 10-14 year  | 95+ years | 1  | 1  |
| Tracheal, bronchus, and lung cancer | Log-transformed SEV scalar: Lung C                  | Male   | 10-14 year  | 95+ years | 1  | 1  |
| Tracheal, bronchus, and lung cancer | Log-transformed age-standardized SEV scalar: Lung C | Female | 10-14 year  | 95+ years | 1  | 1  |
| Tracheal, bronchus, and lung cancer | Log-transformed age-standardized SEV scalar: Lung C | Male   | 10-14 year  | 95+ years | 1  | 1  |
| Tracheal, bronchus, and lung cancer | Outdoor Air Pollution (PM2.5)                       | Female | 10-14 year  | 95+ years | 2  | 2  |
| Tracheal, bronchus, and lung cancer | Outdoor Air Pollution (PM2.5)                       | Male   | 10-14 year  | 95+ years | 2  | 2  |
| Tracheal, bronchus, and lung cancer | Residential radon                                   | Female | 10-14 year  | 95+ years | NA | 2  |
| Tracheal, bronchus, and lung cancer | Residential radon                                   | Male   | 10-14 year  | 95+ years | NA | 2  |
| Tracheal, bronchus, and lung cancer | Secondhand smoke                                    | Female | 10-14 year  | 95+ years | 1  | 2  |
| Tracheal, bronchus, and lung cancer | Secondhand smoke                                    | Male   | 10-14 year  | 95+ years | 1  | 2  |
| Tracheal, bronchus, and lung cancer | Smoking Prevalence                                  | Female | 10-14 year  | 95+ years | 1  | 1  |
| Tracheal, bronchus, and lung cancer | Smoking Prevalence                                  | Male   | 10-14 year  | 95+ years | 1  | 1  |
| Tracheal, bronchus, and lung cancer | Socio-demographic Index                             | Female | 10-14 year  | 95+ years | 3  | 3  |
| Tracheal, bronchus, and lung cancer | Socio-demographic Index                             | Male   | 10-14 year  | 95+ years | 3  | 3  |
| Uterine cancer                      | Age- and sex- specific SEV for low fruit            | Female | 20-24 years | 95+ years | NA | 2  |
| Uterine cancer                      | Age- and sex-specific SEV for Low vegetables        | Female | 20-24 years | 95+ years | NA | 2  |
| Uterine cancer                      | Fruits adjusted (g)                                 | Female | 20-24 years | 95+ years | 2  | NA |
| Uterine cancer                      | Vegetables adjusted (g)                             | Female | 20-24 years | 95+ years | 2  | NA |
| Uterine cancer                      | Cumulative Cigarettes (10 years)                    | Female | 20-24 years | 95+ years | 2  | 2  |
| Uterine cancer                      | Cumulative Cigarettes (5 Years)                     | Female | 20-24 years | 95+ years | 2  | 2  |
| Uterine cancer                      | Diabetes Age-Standardized Prevalence (proportion)   | Female | 20-24 years | 95+ years | 2  | 2  |
| Uterine cancer                      | Education (years per capita)                        | Female | 20-24 years | 95+ years | 3  | 3  |
| Uterine cancer                      | Healthcare access and quality index                 | Female | 20-24 years | 95+ years | 2  | 2  |
| Uterine cancer                      | LDI (I\$ per capita)                                | Female | 20-24 years | 95+ years | 3  | 3  |

|                |                                      |        |             |           |   |    |
|----------------|--------------------------------------|--------|-------------|-----------|---|----|
| Uterine cancer | Log-transformed SEV scalar: Uterus C | Female | 20-24 years | 95+ years | 1 | 1  |
| Uterine cancer | Mean BMI                             | Female | 20-24 years | 95+ years | 1 | 1  |
| Uterine cancer | Smoking Prevalence                   | Female | 20-24 years | 95+ years | 2 | 2  |
| Uterine cancer | Socio-demographic Index              | Female | 20-24 years | 95+ years | 3 | 3  |
| Uterine cancer | Tobacco (cigarettes per capita)      | Female | 20-24 years | 95+ years | 2 | 2  |
| Uterine cancer | Total Fertility Rate                 | Female | 20-24 years | 95+ years | 2 | 2  |
| Uterine cancer | Tobacco (cigarettes per capita)      | Female | 20-24 years | 95+ years | 2 | NA |

Abbreviations: BMI, body mass index; DR, data rich; GBD, Global Burden of Disease Study; GLB, global; HBsAg, hepatitis B surface antigen; HCV, hepatitis C virus; LDI, lag-distributed income; MET, metabolic equivalent of task; NA, not applicable; PM2.5, particulate matter  $\leq 2.5$  micrometers; PUFA, polyunsaturated fatty acid; SEV, summary exposure value.

eTable 9: Results for CODEm model performance testing

| Cause                                               | Sex    | RMSE in  | RMSE out | Trend in | Trend out | Coverage in | Coverage out |
|-----------------------------------------------------|--------|----------|----------|----------|-----------|-------------|--------------|
| Acute lymphoid leukemia [Data Rich]                 | Male   | 0.310748 | 0.421052 | 0.257037 | 0.250826  | 0.999775    | 0.999201     |
| Acute lymphoid leukemia [Global]                    | Male   | 0.340238 | 0.481488 | 0.269561 | 0.266842  | 0.999598    | 0.996258     |
| Acute lymphoid leukemia [Data Rich]                 | Female | 0.330709 | 0.469462 | 0.291051 | 0.295814  | 0.999639    | 0.99753      |
| Acute lymphoid leukemia [Global]                    | Female | 0.387468 | 0.532984 | 0.309633 | 0.305578  | 0.999247    | 0.995595     |
| Acute myeloid leukemia [Data Rich]                  | Male   | 0.41862  | 0.467416 | 0.371762 | 0.271103  | 0.998507    | 0.997028     |
| Acute myeloid leukemia [Global]                     | Male   | 0.442375 | 0.54861  | 0.372251 | 0.356678  | 0.998107    | 0.996117     |
| Acute myeloid leukemia [Data Rich]                  | Female | 0.394568 | 0.448862 | 0.352312 | 0.249893  | 0.998964    | 0.997453     |
| Acute myeloid leukemia [Global]                     | Female | 0.407571 | 0.523704 | 0.353383 | 0.33313   | 0.998587    | 0.995357     |
| Bladder cancer [Data Rich]                          | Male   | 0.240898 | 0.285527 | 0.199469 | 0.213802  | 0.998131    | 0.996401     |
| Bladder cancer [Global]                             | Male   | 0.274484 | 0.368138 | 0.225794 | 0.224493  | 0.998225    | 0.990777     |
| Bladder cancer [Data Rich]                          | Female | 0.219065 | 0.27044  | 0.179335 | 0.199428  | 0.99817     | 0.997553     |
| Bladder cancer [Global]                             | Female | 0.253852 | 0.361089 | 0.201613 | 0.206813  | 0.998074    | 0.995339     |
| Brain and central nervous system cancer [Data Rich] | Male   | 0.256468 | 0.339441 | 0.198232 | 0.243717  | 0.998414    | 0.997352     |
| Brain and central nervous system cancer [Global]    | Male   | 0.317265 | 0.455977 | 0.221404 | 0.227775  | 0.998775    | 0.992953     |
| Brain and central nervous system cancer [Data Rich] | Female | 0.275224 | 0.35502  | 0.190857 | 0.22379   | 0.99882     | 0.997871     |
| Brain and central nervous system cancer [Global]    | Female | 0.301083 | 0.44498  | 0.2191   | 0.22137   | 0.99905     | 0.994921     |
| Breast cancer [Data Rich]                           | Male   | 0.706904 | 0.839615 | 0.646192 | 0.755323  | 0.928699    | 0.92097      |
| Breast cancer [Global]                              | Male   | 0.769967 | 0.895063 | 0.67604  | 0.665045  | 0.939103    | 0.925064     |
| Breast cancer [Data Rich]                           | Female | 0.190097 | 0.238463 | 0.156457 | 0.180158  | 0.995296    | 0.992005     |
| Breast cancer [Global]                              | Female | 0.213415 | 0.292349 | 0.168595 | 0.171745  | 0.995641    | 0.986556     |
| Cervical cancer [Data Rich]                         | Female | 0.205345 | 0.259868 | 0.169338 | 0.203447  | 0.998678    | 0.997579     |
| Cervical cancer [Global]                            | Female | 0.242419 | 0.360121 | 0.195079 | 0.201005  | 0.999068    | 0.991885     |
| Chronic lymphoid leukemia [Data Rich]               | Male   | 0.281179 | 0.549864 | 0.215486 | 0.224895  | 0.993027    | 0.986267     |
| Chronic lymphoid leukemia [Global]                  | Male   | 0.320083 | 0.610391 | 0.242085 | 0.241267  | 0.992505    | 0.982641     |
| Chronic lymphoid leukemia [Data Rich]               | Female | 0.39135  | 0.586716 | 0.370043 | 0.380051  | 0.988081    | 0.980056     |
| Chronic lymphoid leukemia [Global]                  | Female | 0.412761 | 0.641749 | 0.374616 | 0.418784  | 0.989395    | 0.977703     |
| Chronic myeloid leukemia [Data Rich]                | Male   | 0.337209 | 0.602014 | 0.292333 | 0.283856  | 0.985279    | 0.98508      |

|                                                  |        |          |          |          |          |          |          |
|--------------------------------------------------|--------|----------|----------|----------|----------|----------|----------|
| Chronic myeloid leukemia [Global]                | Male   | 0.367785 | 0.691518 | 0.303339 | 0.313485 | 0.988074 | 0.985079 |
| Chronic myeloid leukemia [Data Rich]             | Female | 0.350665 | 0.590275 | 0.289082 | 0.278623 | 0.984769 | 0.985895 |
| Chronic myeloid leukemia [Global]                | Female | 0.398875 | 0.739473 | 0.313448 | 0.315678 | 0.987321 | 0.984064 |
| Colon and rectum cancer [Data Rich]              | Male   | 0.190946 | 0.24147  | 0.157788 | 0.159771 | 0.995286 | 0.992178 |
| Colon and rectum cancer [Global]                 | Male   | 0.227892 | 0.304014 | 0.184744 | 0.177172 | 0.996427 | 0.989429 |
| Colon and rectum cancer [Data Rich]              | Female | 0.18306  | 0.231029 | 0.151894 | 0.158584 | 0.99588  | 0.993197 |
| Colon and rectum cancer [Global]                 | Female | 0.206598 | 0.280277 | 0.168597 | 0.167246 | 0.996496 | 0.991145 |
| Esophageal cancer [Data Rich]                    | Male   | 0.197786 | 0.243235 | 0.162392 | 0.178707 | 0.998139 | 0.996859 |
| Esophageal cancer [Global]                       | Male   | 0.240983 | 0.396882 | 0.188189 | 0.190213 | 0.998341 | 0.981691 |
| Esophageal cancer [Data Rich]                    | Female | 0.216536 | 0.272917 | 0.181223 | 0.22027  | 0.99904  | 0.998262 |
| Esophageal cancer [Global]                       | Female | 0.262599 | 0.439    | 0.209188 | 0.207226 | 0.998757 | 0.984349 |
| Gallbladder and biliary tract cancer [Data Rich] | Male   | 0.210762 | 0.257952 | 0.170754 | 0.179093 | 0.99896  | 0.997991 |
| Gallbladder and biliary tract cancer [Global]    | Male   | 0.251943 | 0.357674 | 0.200561 | 0.195415 | 0.999264 | 0.992854 |
| Gallbladder and biliary tract cancer [Data Rich] | Female | 0.213419 | 0.254766 | 0.168672 | 0.176916 | 0.998906 | 0.997939 |
| Gallbladder and biliary tract cancer [Global]    | Female | 0.239816 | 0.352588 | 0.187002 | 0.183674 | 0.998964 | 0.988385 |
| Hodgkin lymphoma [Data Rich]                     | Male   | 0.338556 | 0.440404 | 0.288515 | 0.347947 | 0.997264 | 0.997151 |
| Hodgkin lymphoma [Global]                        | Male   | 0.403778 | 0.527964 | 0.308644 | 0.308939 | 0.999444 | 0.995815 |
| Hodgkin lymphoma [Data Rich]                     | Female | 0.425215 | 0.529984 | 0.29507  | 0.366626 | 0.990635 | 0.991235 |
| Hodgkin lymphoma [Global]                        | Female | 0.460638 | 0.612558 | 0.325305 | 0.337065 | 0.992827 | 0.987712 |
| Kidney cancer [Data Rich]                        | Male   | 0.270148 | 0.374426 | 0.231028 | 0.292066 | 0.997861 | 0.996453 |
| Kidney cancer [Global]                           | Male   | 0.28997  | 0.414506 | 0.23986  | 0.255253 | 0.998188 | 0.99382  |
| Kidney cancer [Data Rich]                        | Female | 0.282258 | 0.435576 | 0.234894 | 0.322233 | 0.99821  | 0.996758 |
| Kidney cancer [Global]                           | Female | 0.305091 | 0.46851  | 0.244577 | 0.267581 | 0.99812  | 0.993281 |
| Larynx cancer [Data Rich]                        | Male   | 0.220774 | 0.265656 | 0.184647 | 0.198589 | 0.999327 | 0.998863 |
| Larynx cancer [Global]                           | Male   | 0.267476 | 0.391878 | 0.214871 | 0.213209 | 0.999372 | 0.990982 |
| Larynx cancer [Data Rich]                        | Female | 0.290484 | 0.349996 | 0.246702 | 0.27534  | 0.993277 | 0.993692 |
| Larynx cancer [Global]                           | Female | 0.359559 | 0.514848 | 0.290491 | 0.292231 | 0.994598 | 0.989664 |
| Leukemia [Data Rich]                             | Male   | 0.214077 | 0.263591 | 0.186937 | 0.222432 | 0.999145 | 0.99826  |
| Leukemia [Global]                                | Male   | 0.271541 | 0.335096 | 0.211088 | 0.213378 | 0.999578 | 0.99719  |
| Leukemia [Data Rich]                             | Female | 0.198555 | 0.244279 | 0.170536 | 0.197341 | 0.999169 | 0.998474 |



|                                        |        |          |          |          |          |          |          |
|----------------------------------------|--------|----------|----------|----------|----------|----------|----------|
| Leukemia [Global]                      | Female | 0.253005 | 0.323649 | 0.211247 | 0.20947  | 0.999523 | 0.997907 |
| Lip and oral cavity cancer [Data Rich] | Male   | 0.254061 | 0.321112 | 0.216056 | 0.205439 | 0.997306 | 0.995437 |
| Lip and oral cavity cancer [Global]    | Male   | 0.268411 | 0.385903 | 0.22366  | 0.222025 | 0.997854 | 0.993797 |
| Lip and oral cavity cancer [Data Rich] | Female | 0.217157 | 0.297755 | 0.177057 | 0.17384  | 0.998593 | 0.997568 |
| Lip and oral cavity cancer [Global]    | Female | 0.245299 | 0.35369  | 0.191169 | 0.192107 | 0.998795 | 0.996958 |
| Liver cancer [Data Rich]               | Male   | 0.277096 | 0.371486 | 0.229624 | 0.264623 | 0.996156 | 0.993083 |
| Liver cancer [Global]                  | Male   | 0.32687  | 0.631061 | 0.266922 | 0.270088 | 0.995476 | 0.972126 |
| Liver cancer [Data Rich]               | Female | 0.316171 | 0.408322 | 0.22516  | 0.260284 | 0.99793  | 0.995804 |
| Liver cancer [Global]                  | Female | 0.32009  | 0.590435 | 0.259578 | 0.266162 | 0.997457 | 0.981469 |
| Malignant skin melanoma [Data Rich]    | Male   | 0.282741 | 0.405971 | 0.221329 | 0.232564 | 0.998476 | 0.997567 |
| Malignant skin melanoma [Global]       | Male   | 0.341866 | 0.461807 | 0.244628 | 0.239671 | 0.99866  | 0.993613 |
| Malignant skin melanoma [Data Rich]    | Female | 0.248595 | 0.333716 | 0.193576 | 0.193995 | 0.999166 | 0.998469 |
| Malignant skin melanoma [Global]       | Female | 0.323326 | 0.441126 | 0.225913 | 0.220791 | 0.99899  | 0.995255 |
| Mesothelioma [Data Rich]               | Male   | 0.200856 | 0.360612 | 0.175292 | 0.234068 | 0.999987 | 0.999943 |
| Mesothelioma [Global]                  | Male   | 0.264438 | 0.437326 | 0.19753  | 0.214515 | 0.999683 | 0.996791 |
| Mesothelioma [Data Rich]               | Female | 0.455723 | 0.910995 | 0.454968 | 0.689974 | 0.999968 | 0.991245 |
| Mesothelioma [Global]                  | Female | 0.440471 | 0.744811 | 0.415638 | 0.499273 | 0.998004 | 0.987963 |
| Multiple myeloma [Data Rich]           | Male   | 0.232883 | 0.275872 | 0.189341 | 0.190352 | 0.999453 | 0.999132 |
| Multiple myeloma [Global]              | Male   | 0.299219 | 0.383876 | 0.223369 | 0.218695 | 0.999491 | 0.995722 |
| Multiple myeloma [Data Rich]           | Female | 0.242432 | 0.287812 | 0.200849 | 0.200434 | 0.999643 | 0.999242 |
| Multiple myeloma [Global]              | Female | 0.304571 | 0.388807 | 0.226423 | 0.228057 | 0.999523 | 0.995996 |
| Nasopharynx cancer [Data Rich]         | Male   | 0.277888 | 0.328338 | 0.243308 | 0.246639 | 0.999822 | 0.999556 |
| Nasopharynx cancer [Global]            | Male   | 0.303888 | 0.463655 | 0.255738 | 0.252325 | 0.999663 | 0.990558 |
| Nasopharynx cancer [Data Rich]         | Female | 0.301697 | 0.369424 | 0.259233 | 0.289024 | 0.995143 | 0.994079 |
| Nasopharynx cancer [Global]            | Female | 0.33418  | 0.503304 | 0.273791 | 0.274855 | 0.994869 | 0.987136 |
| Non-Hodgkin lymphoma [Data Rich]       | Male   | 0.190296 | 0.26584  | 0.155396 | 0.176023 | 0.998955 | 0.997787 |
| Non-Hodgkin lymphoma [Global]          | Male   | 0.212483 | 0.326477 | 0.164107 | 0.162797 | 0.99916  | 0.995587 |
| Non-Hodgkin lymphoma [Data Rich]       | Female | 0.1921   | 0.275211 | 0.158491 | 0.182009 | 0.99926  | 0.998202 |
| Non-Hodgkin lymphoma [Global]          | Female | 0.218556 | 0.335889 | 0.168391 | 0.166175 | 0.999419 | 0.996138 |

|                                                                |        |          |          |          |          |          |          |
|----------------------------------------------------------------|--------|----------|----------|----------|----------|----------|----------|
| Non-melanoma skin cancer (squamous-cell carcinoma) [Data Rich] | Male   | 0.187014 | 0.271342 | 0.132362 | 0.153868 | 0.999799 | 0.999579 |
| Non-melanoma skin cancer (squamous-cell carcinoma) [Global]    | Male   | 0.215805 | 0.354613 | 0.150469 | 0.152022 | 0.999798 | 0.997394 |
| Non-melanoma skin cancer (squamous-cell carcinoma) [Data Rich] | Female | 0.213103 | 0.305569 | 0.155533 | 0.168031 | 0.999125 | 0.998895 |
| Non-melanoma skin cancer (squamous-cell carcinoma) [Global]    | Female | 0.267942 | 0.451328 | 0.188854 | 0.185703 | 0.998427 | 0.992207 |
| Other leukemia [Data Rich]                                     | Male   | 0.282494 | 0.381942 | 0.241361 | 0.229578 | 0.999734 | 0.999253 |
| Other leukemia [Global]                                        | Male   | 0.309665 | 0.463243 | 0.251833 | 0.245941 | 0.99957  | 0.993564 |
| Other leukemia [Data Rich]                                     | Female | 0.279342 | 0.386578 | 0.238006 | 0.240633 | 0.999753 | 0.999095 |
| Other leukemia [Global]                                        | Female | 0.337468 | 0.46428  | 0.252373 | 0.245634 | 0.999625 | 0.994124 |
| Other malignant neoplasms [Data Rich]                          | Male   | 0.209241 | 0.256764 | 0.172726 | 0.190063 | 0.996091 | 0.993792 |
| Other malignant neoplasms [Global]                             | Male   | 0.249786 | 0.354058 | 0.189328 | 0.193065 | 0.997607 | 0.991761 |
| Other malignant neoplasms [Data Rich]                          | Female | 0.198916 | 0.238695 | 0.166856 | 0.173074 | 0.99734  | 0.994796 |
| Other malignant neoplasms [Global]                             | Female | 0.220775 | 0.335985 | 0.175327 | 0.179505 | 0.997653 | 0.993175 |
| Other pharynx cancer [Data Rich]                               | Male   | 0.244485 | 0.307088 | 0.20426  | 0.213738 | 0.999408 | 0.998881 |
| Other pharynx cancer [Global]                                  | Male   | 0.277714 | 0.443553 | 0.222129 | 0.217025 | 0.999432 | 0.991696 |
| Other pharynx cancer [Data Rich]                               | Female | 0.280274 | 0.3384   | 0.238221 | 0.250264 | 0.998726 | 0.998526 |
| Other pharynx cancer [Global]                                  | Female | 0.309356 | 0.441873 | 0.253513 | 0.247686 | 0.999056 | 0.996806 |
| Ovarian cancer [Data Rich]                                     | Female | 0.207516 | 0.273279 | 0.168154 | 0.184435 | 0.998087 | 0.996715 |
| Ovarian cancer [Global]                                        | Female | 0.240434 | 0.348621 | 0.180684 | 0.182016 | 0.998618 | 0.994472 |
| Pancreatic cancer [Data Rich]                                  | Male   | 0.208363 | 0.263915 | 0.171769 | 0.200205 | 0.99645  | 0.994616 |
| Pancreatic cancer [Global]                                     | Male   | 0.243467 | 0.353046 | 0.195591 | 0.196526 | 0.99724  | 0.992451 |
| Pancreatic cancer [Data Rich]                                  | Female | 0.211322 | 0.264799 | 0.179225 | 0.205886 | 0.997031 | 0.995275 |
| Pancreatic cancer [Global]                                     | Female | 0.229988 | 0.327964 | 0.18741  | 0.191431 | 0.997558 | 0.994161 |
| Prostate cancer [Data Rich]                                    | Male   | 0.1923   | 0.229505 | 0.147543 | 0.160288 | 0.997635 | 0.995545 |
| Prostate cancer [Global]                                       | Male   | 0.219589 | 0.279819 | 0.155811 | 0.152698 | 0.997501 | 0.991061 |
| Stomach cancer [Data Rich]                                     | Male   | 0.174823 | 0.216585 | 0.143368 | 0.163153 | 0.996825 | 0.994387 |
| Stomach cancer [Global]                                        | Male   | 0.221437 | 0.342098 | 0.175544 | 0.175098 | 0.997261 | 0.97773  |
| Stomach cancer [Data Rich]                                     | Female | 0.172379 | 0.213413 | 0.142051 | 0.160748 | 0.997414 | 0.995481 |

|                                                 |        |          |          |          |          |          |          |
|-------------------------------------------------|--------|----------|----------|----------|----------|----------|----------|
| Stomach cancer [Global]                         | Female | 0.224046 | 0.327492 | 0.176793 | 0.173164 | 0.997996 | 0.984052 |
| Testicular cancer [Data Rich]                   | Male   | 0.338756 | 0.466129 | 0.286761 | 0.281068 | 0.999256 | 0.998529 |
| Testicular cancer [Global]                      | Male   | 0.452611 | 0.643414 | 0.381982 | 0.385017 | 0.995095 | 0.989925 |
| Thyroid cancer [Data Rich]                      | Male   | 0.301986 | 0.364563 | 0.25634  | 0.275841 | 0.999081 | 0.998499 |
| Thyroid cancer [Global]                         | Male   | 0.325978 | 0.451676 | 0.268093 | 0.275032 | 0.999028 | 0.997434 |
| Thyroid cancer [Data Rich]                      | Female | 0.374735 | 0.424526 | 0.329318 | 0.307338 | 0.994602 | 0.992091 |
| Thyroid cancer [Global]                         | Female | 0.395627 | 0.504645 | 0.330969 | 0.329624 | 0.995041 | 0.991576 |
| Tracheal, bronchus, and lung cancer [Data Rich] | Male   | 0.20052  | 0.252085 | 0.164035 | 0.168916 | 0.995802 | 0.992387 |
| Tracheal, bronchus, and lung cancer [Global]    | Male   | 0.256649 | 0.350376 | 0.202454 | 0.193446 | 0.997257 | 0.979902 |
| Tracheal, bronchus, and lung cancer [Data Rich] | Female | 0.211586 | 0.278726 | 0.1735   | 0.187087 | 0.997126 | 0.994813 |
| Tracheal, bronchus, and lung cancer [Global]    | Female | 0.259003 | 0.380143 | 0.20628  | 0.196712 | 0.998099 | 0.984358 |
| Uterine cancer [Data Rich]                      | Female | 0.228228 | 0.279147 | 0.190758 | 0.20872  | 0.999054 | 0.998101 |
| Uterine cancer [Global]                         | Female | 0.31705  | 0.413482 | 0.255661 | 0.25166  | 0.9992   | 0.994406 |

Abbreviations: RMSE, root mean squared error.

Footnote: RMSE measures the deviation between the data and the model estimate. Trend refers to the percent of predictions that correctly predict the direction of the time trend from adjacent points. Coverage refers to the percent of data that are included within the ensemble uncertainty interval. For performance testing, data are split into training and out-of-sample testing sets. Columns with “in” refer to the performance within the training sample data, while “out” refer to the performance of the ensemble within the withheld out-of-sample data. “Global” models include all locations, while “Data Rich” models include a subset of locations with high-quality data.

*eTable 10: Percent change before and after CoDCorrect by cancer for all ages, both sexes combined, 2019*

| <b>Cause</b>                            | <b>CoDCorrect level</b> | <b>Percent change<br/>(95% uncertainty interval)</b> |
|-----------------------------------------|-------------------------|------------------------------------------------------|
| Neoplasms                               | 2                       | 1.74<br>(-3.24 to 4.88)                              |
| Bladder cancer                          | 3                       | 1.56<br>(-5.03 to 5.33)                              |
| Brain and central nervous system cancer | 3                       | 1.41<br>(-1.74 to 4.93)                              |
| Breast cancer                           | 3                       | 2.12<br>(-3.22 to 5.63)                              |
| Cervical cancer                         | 3                       | 3.36<br>(-0.98 to 7.20)                              |
| Colon and rectum cancer                 | 3                       | 1.4<br>(-4.72 to 4.84)                               |
| Esophageal cancer                       | 3                       | 1.66<br>(-2.51 to 4.87)                              |
| Gallbladder and biliary tract cancer    | 3                       | 1.96<br>(-5.22 to 6.36)                              |
| Hodgkin lymphoma                        | 3                       | 5.82<br>(1.76 to 9.73)                               |
| Kidney cancer                           | 3                       | 0.89<br>(-4.18 to 3.85)                              |
| Larynx cancer                           | 3                       | 4.03<br>(0.75 to 7.15)                               |
| Leukemia                                | 3                       | 2.29<br>(-2.23 to 5.78)                              |
| Lip and oral cavity cancer              | 3                       | 4.93<br>(0.68 to 8.65)                               |
| Liver cancer                            | 3                       | 1.19<br>(-3.38 to 4.41)                              |
| Malignant skin melanoma                 | 3                       | 0.86<br>(-4.06 to 3.72)                              |
| Mesothelioma                            | 3                       | 0.99<br>(-4.19 to 3.99)                              |
| Multiple myeloma                        | 3                       | 1.23<br>(-4.67 to 4.60)                              |
| Nasopharynx cancer                      | 3                       | 3.53<br>(0.64 to 7.06)                               |
| Non-Hodgkin lymphoma                    | 3                       | 2.06<br>(-3.12 to 5.64)                              |
| Non-melanoma skin cancer                | 3                       | 1.56<br>(-6.01 to 5.78)                              |

|                                     |   |                         |
|-------------------------------------|---|-------------------------|
| Other malignant neoplasms           | 3 | 3.71<br>(-0.73 to 7.64) |
| Other pharynx cancer                | 3 | 5.54<br>(2.32 to 9.49)  |
| Ovarian cancer                      | 3 | 1.46<br>(-3.95 to 5.04) |
| Pancreatic cancer                   | 3 | 0.85<br>(-5.11 to 4.06) |
| Prostate cancer                     | 3 | 2.13<br>(-4.09 to 5.99) |
| Stomach cancer                      | 3 | 1.88<br>(-3.22 to 5.18) |
| Testicular cancer                   | 3 | 5.8<br>(2.71 to 10.87)  |
| Thyroid cancer                      | 3 | 3.33<br>(-2.39 to 7.08) |
| Tracheal, bronchus, and lung cancer | 3 | 0.72<br>(-3.95 to 3.60) |
| Uterine cancer                      | 3 | 1.41<br>(-4.77 to 4.97) |

eTable 11: Duration of four prevalence phases by cancer

| Cancer                                  | Diagnosis/<br>Treatment<br>(months) | Remission<br>(months) | Disseminated/<br>metastatic<br>(months) | Terminal<br>(months) | Note for metastatic phase                                         |
|-----------------------------------------|-------------------------------------|-----------------------|-----------------------------------------|----------------------|-------------------------------------------------------------------|
| Esophageal cancer                       | 5.0 <sup>33</sup>                   | *                     | 4.6 <sup>34</sup>                       | 1                    | SEER Summary Stage 1977 (Distant site/node involved)              |
| Stomach cancer                          | 5.2 <sup>33</sup>                   | *                     | 3.9 <sup>34</sup>                       | 1                    | SEER Summary Stage 1977 (Distant site/node involved)<br>1995-2000 |
| Liver cancer                            | 4.0                                 | *                     | 2.5 <sup>34</sup>                       | 1                    | SEER Summary Stage 1977 (Distant site/node involved)              |
| Larynx cancer                           | 5.3 <sup>33</sup>                   | *                     | 8.8 <sup>34</sup>                       | 1                    | SEER Stage IVc                                                    |
| Tracheal, bronchus, and lung<br>cancer  | 3.3 <sup>35</sup>                   | *                     | 4.5 <sup>34</sup>                       | 1                    | SEER Summary Stage 1977 (Distant site/node involved)<br>1995-2000 |
| Breast cancer                           | 3.0 <sup>35</sup>                   | *                     | 17.7 <sup>34</sup>                      | 1                    | SEER Summary Stage 1977 (Distant site/node involved)<br>1995-2000 |
| Cervical cancer                         | 4.8 <sup>33</sup>                   | *                     | 9.2 <sup>34</sup>                       | 1                    | SEER Summary Stage 1977 (Distant site/node involved)<br>1995-2000 |
| Uterine cancer                          | 4.6 <sup>33</sup>                   | *                     | 11.6 <sup>34</sup>                      | 1                    | SEER Summary Stage 1977 (Distant site/node involved)<br>1995-2000 |
| Prostate cancer                         | 4.0 <sup>35</sup>                   | *                     | 30.4 <sup>34</sup>                      | 1                    | SEER Summary Stage 1977 (Distant site/node involved)<br>1995-2000 |
| Colon and rectum cancer                 | 4.0 <sup>35</sup>                   | *                     | 9.7 <sup>34</sup>                       | 1                    | SEER Summary Stage 1977 (Distant site/node involved)              |
| Lip and oral cavity cancers             | 5.3 <sup>33</sup>                   | *                     | 9.3 <sup>34</sup>                       | 1                    | SEER Stage IVc                                                    |
| Nasopharynx cancer                      | 5.3 <sup>33</sup>                   | *                     | 9.3 <sup>34</sup>                       | 1                    | SEER Stage IVc                                                    |
| Other pharynx cancer                    | 5.3 <sup>33</sup>                   | *                     | 13.2 <sup>34</sup>                      | 1                    | SEER Stage IVc                                                    |
| Gallbladder and biliary tract<br>cancer | 4.0                                 | *                     | 3.5 <sup>34</sup>                       | 1                    | SEER Summary Stage 1977 (Distant site/node involved)<br>1995-2000 |
| Pancreatic cancer                       | 4.1 <sup>33</sup>                   | *                     | 2.5 <sup>34</sup>                       | 1                    | SEER Summary Stage 1977 (Distant site/node involved)<br>1995-2000 |
| Malignant skin melanoma                 | 2.9 <sup>36</sup>                   | *                     | 7.2 <sup>34</sup>                       | 1                    | SEER Summary Stage 1977 (Distant site/node involved)<br>1995-2000 |
| Ovarian cancer                          | 3.2 <sup>35</sup>                   | *                     | 25.6 <sup>34</sup>                      | 1                    | SEER Summary Stage 1977 (Distant site/node involved)<br>1995-2000 |
| Testicular cancer                       | 3.7 <sup>33</sup>                   | *                     | 19.5 <sup>34</sup>                      | 1                    | SEER Stage III                                                    |

|                                         |                                      |   |                    |   |                                                                                                                                         |
|-----------------------------------------|--------------------------------------|---|--------------------|---|-----------------------------------------------------------------------------------------------------------------------------------------|
| Kidney cancer                           | 5.3 <sup>33</sup>                    | * | 5.4 <sup>34</sup>  | 1 | SEER Summary Stage 1977 (Distant site/node involved) 1995-2000                                                                          |
| Bladder cancer                          | 5.1 <sup>33</sup>                    | * | 5.8 <sup>34</sup>  | 1 | SEER Summary Stage 1977 (Distant site/node involved) 1995-2000                                                                          |
| Brain and central nervous system cancer | 5.0                                  | * | 6.9 <sup>34</sup>  | 1 | SEER median age standardized survival all patients, all years                                                                           |
| Thyroid cancer                          | 3.0                                  | * | 19.4 <sup>34</sup> | 1 | SEER Stage IVc                                                                                                                          |
| Mesothelioma                            | 4.0                                  | * | 7.8 <sup>34</sup>  | 1 | SEER Summary Stage 1977 (Distant site/node involved) 1995-2000                                                                          |
| Hodgkin lymphoma                        | 3.7 <sup>35</sup>                    | * | 26.0 <sup>37</sup> | 1 |                                                                                                                                         |
| Non-Hodgkin lymphoma                    | 3.7 <sup>35</sup>                    | * | 7.7 <sup>37</sup>  | 1 |                                                                                                                                         |
| Multiple myeloma                        | 7.0 <sup>33</sup>                    | * | 36.8 <sup>34</sup> | 1 | SEER median age standardized survival all patients, all years                                                                           |
| Leukemia                                | 5.0 <sup>33</sup>                    | * | 43.7 <sup>34</sup> | 1 | SEER median age standardized survival all patients, all years                                                                           |
| Acute lymphoid leukemia                 | 12.0                                 | * | 7.0 <sup>34</sup>  | 1 | SEER median age standardized survival all patients, all years                                                                           |
| Acute myeloid leukemia                  | 6.0                                  | * | 4.6 <sup>34</sup>  | 1 | SEER median age standardized survival all patients, all years                                                                           |
| Chronic lymphoid leukemia               | 6.0                                  | * | 48.0 <sup>38</sup> | 1 | SEER median age standardized survival all patients, all years                                                                           |
| Chronic myeloid leukemia                | 6.0                                  | * | 4.6 <sup>34</sup>  | 1 | SEER median age standardized survival for AML (patients wit CML die in blast crisis, which is treated like AML) all patients, all years |
| Other leukemia                          | 6.0                                  | * | 48.0 <sup>38</sup> | 1 | SEER median age standardized survival all patients, all years                                                                           |
| Other malignant neoplasms               | 4.4 (mean of other cancer durations) | * | 15.8 <sup>34</sup> | 1 | SEER median age standardized survival all patients, all years                                                                           |

Footnote: The remission phase duration is calculated based on the remaining time after attributing other sequelae durations. Superscripts refer to references used to inform these values.

eTable 12: Disability weights

| Health state                                                                                                                               | Lay description                                                                                                                                                                          | Disability weight<br>(95% uncertainty interval) |
|--------------------------------------------------------------------------------------------------------------------------------------------|------------------------------------------------------------------------------------------------------------------------------------------------------------------------------------------|-------------------------------------------------|
| Cancer, diagnosis and primary therapy<br><i>All cancers except non-melanoma skin cancer</i>                                                | This person has pain, nausea, fatigue, weight loss and high anxiety.                                                                                                                     | 0.288<br>(0.193 to 0.399)                       |
| Cancer, controlled phase<br><i>All cancers except non-melanoma skin cancer</i>                                                             | This person has a chronic disease that requires medication every day and causes some worry but minimal interference with daily activities.                                               | 0.049<br>(0.031 to 0.072)                       |
| Cancer, metastatic<br><i>All cancers except non-melanoma skin cancer</i>                                                                   | This person has severe pain, extreme fatigue, weight loss and high anxiety.                                                                                                              | 0.451<br>(0.307 to 0.600)                       |
| Terminal phase, with medication<br><i>All cancers except non-melanoma skin cancer</i>                                                      | This person has lost a lot of weight and regularly uses strong medication to avoid constant pain. The person has no appetite, feels nauseous, and needs to spend most of the day in bed. | 0.540<br>(0.377 to 0.687)                       |
| Generic uncomplicated disease: worry and daily medication<br><i>Myelodysplastic, myeloproliferative, and other hematopoietic neoplasms</i> | This person has a chronic disease that requires medication every day and causes some worry but minimal interference with daily activities.                                               | 0.049<br>(0.031 to 0.072)                       |
| Mastectomy<br><i>Breast cancer</i>                                                                                                         | This person had one of her breasts removed and sometimes has pain or swelling in the arms.                                                                                               | 0.036<br>(0.020 to 0.057)                       |
| Stoma<br><i>Colon and rectum cancer</i>                                                                                                    | This person has a pouch attached to an opening in the belly to collect and empty stools.                                                                                                 | 0.095<br>(0.063 to 0.131)                       |
| Laryngectomy<br><i>Larynx cancer</i>                                                                                                       | This person has difficulty speaking, and others find it difficult to understand.                                                                                                         | 0.051<br>(0.032 to 0.078)                       |
| Urinary incontinence<br><i>Bladder cancer; Prostate cancer</i>                                                                             | This person cannot control urinating.                                                                                                                                                    | 0.139<br>(0.094 to 0.198)                       |



|                                                                                                      |                                                                                                                                                                                                                                               |                                   |
|------------------------------------------------------------------------------------------------------|-----------------------------------------------------------------------------------------------------------------------------------------------------------------------------------------------------------------------------------------------|-----------------------------------|
| <p>Impotence<br/><i>Prostate cancer</i></p>                                                          | <p>This person has difficulty in obtaining or maintaining an erection.</p>                                                                                                                                                                    | <p>0.017<br/>(0.009 to 0.030)</p> |
| <p>Disfigurement,<br/>level 1<br/><i>Cutaneous squamous cell carcinoma; Basal cell carcinoma</i></p> | <p>This person has a slight, visible physical deformity that others notice, which causes some worry and discomfort.</p>                                                                                                                       | <p>0.011<br/>(0.005 to 0.021)</p> |
| <p>Disfigurement,<br/>level 2<br/><i>Cutaneous squamous cell carcinoma</i></p>                       | <p>This person has a visible physical deformity that causes others to stare and comment. As a result, the person is worried and has trouble sleeping and concentrating.</p>                                                                   | <p>0.067<br/>(0.044 to 0.096)</p> |
| <p>Disfigurement,<br/>level 3, with itch/pain<br/><i>Cutaneous squamous cell carcinoma</i></p>       | <p>This person has an obvious physical deformity that is very painful and itchy. The physical deformity makes others uncomfortable, which causes the person to avoid social contact, feel worried, sleep poorly, and think about suicide.</p> | <p>0.576<br/>(0.401 to 0.731)</p> |

eTable 13: GATHER<sup>5</sup> guidelines checklist

| Item #                                                                                                | Checklist item                                                                                                                                                                                                                                                                                                                                                                            | Reported on page #                                                                                                                                                                                                                                  |
|-------------------------------------------------------------------------------------------------------|-------------------------------------------------------------------------------------------------------------------------------------------------------------------------------------------------------------------------------------------------------------------------------------------------------------------------------------------------------------------------------------------|-----------------------------------------------------------------------------------------------------------------------------------------------------------------------------------------------------------------------------------------------------|
| <b>Objectives and funding</b>                                                                         |                                                                                                                                                                                                                                                                                                                                                                                           |                                                                                                                                                                                                                                                     |
| 1                                                                                                     | Define the indicator(s), populations (including age, sex, and geographic entities), and time period(s) for which estimates were made.                                                                                                                                                                                                                                                     | Appendix pg. 5                                                                                                                                                                                                                                      |
| 2                                                                                                     | List the funding sources for the work.                                                                                                                                                                                                                                                                                                                                                    | See main manuscript                                                                                                                                                                                                                                 |
| <b>Data Inputs</b>                                                                                    |                                                                                                                                                                                                                                                                                                                                                                                           |                                                                                                                                                                                                                                                     |
| <i>For all data inputs from multiple sources that are synthesized as part of the study:</i>           |                                                                                                                                                                                                                                                                                                                                                                                           |                                                                                                                                                                                                                                                     |
| 3                                                                                                     | Describe how the data were identified and how the data were accessed.                                                                                                                                                                                                                                                                                                                     | Appendix pg. 6                                                                                                                                                                                                                                      |
| 4                                                                                                     | Specify the inclusion and exclusion criteria. Identify all ad-hoc exclusions.                                                                                                                                                                                                                                                                                                             | Appendix pg. 6                                                                                                                                                                                                                                      |
| 5                                                                                                     | Provide information on all included data sources and their main characteristics. For each data source used, report reference information or contact name/institution, population represented, data collection method, year(s) of data collection, sex and age range, diagnostic criteria or measurement method, and sample size, as relevant.                                             | <a href="http://ghdx.healthdata.org/gbd-2019">http://ghdx.healthdata.org/gbd-2019</a>                                                                                                                                                               |
| 6                                                                                                     | Identify and describe any categories of input data that have potentially important biases (e.g., based on characteristics listed in item 5).                                                                                                                                                                                                                                              | Appendix pg. 7                                                                                                                                                                                                                                      |
| <i>For data inputs that contribute to the analysis but were not synthesized as part of the study:</i> |                                                                                                                                                                                                                                                                                                                                                                                           |                                                                                                                                                                                                                                                     |
| 7                                                                                                     | Describe and give sources for any other data inputs.                                                                                                                                                                                                                                                                                                                                      | <a href="http://ghdx.healthdata.org/gbd-2019">http://ghdx.healthdata.org/gbd-2019</a>                                                                                                                                                               |
| <i>For all data inputs:</i>                                                                           |                                                                                                                                                                                                                                                                                                                                                                                           |                                                                                                                                                                                                                                                     |
| 8                                                                                                     | Provide all data inputs in a file format from which data can be efficiently extracted (e.g., a spreadsheet rather than a PDF), including all relevant meta-data listed in item 5. For any data inputs that cannot be shared because of ethical or legal reasons, such as third-party ownership, provide a contact name or the name of the institution that retains the right to the data. | <a href="http://ghdx.healthdata.org/gbd-2019">http://ghdx.healthdata.org/gbd-2019</a>                                                                                                                                                               |
| <b>Data analysis</b>                                                                                  |                                                                                                                                                                                                                                                                                                                                                                                           |                                                                                                                                                                                                                                                     |
| 9                                                                                                     | Provide a conceptual overview of the data analysis method. A diagram may be helpful.                                                                                                                                                                                                                                                                                                      | Appendix pg. 201-202 (eFigures 2 & 3)                                                                                                                                                                                                               |
| 10                                                                                                    | Provide a detailed description of all steps of the analysis, including mathematical formulae. This description should cover, as relevant, data cleaning, data pre-processing, data adjustments and weighting of data sources, and mathematical or statistical model(s).                                                                                                                   | Appendix pg. 7-17                                                                                                                                                                                                                                   |
| 11                                                                                                    | Describe how candidate models were evaluated and how the final model(s) were selected.                                                                                                                                                                                                                                                                                                    | Found in <i>Section 3: Causes of death modelling methods</i> of the Supplementary appendix 1 to “GBD 2019 Diseases and Injuries Collaborators. Global burden of 369 diseases and injuries in 204 countries and territories, 1990–2019: a systematic |

|                               |                                                                                                                                                                  |                                                                                                                                                                                                                                                           |
|-------------------------------|------------------------------------------------------------------------------------------------------------------------------------------------------------------|-----------------------------------------------------------------------------------------------------------------------------------------------------------------------------------------------------------------------------------------------------------|
|                               |                                                                                                                                                                  | analysis for the Global Burden of Disease Study 2019.” <sup>2</sup> Details of covariate selection for cancer models can be found in: Appendix pg. 84-110 (eTable7)                                                                                       |
| 12                            | Provide the results of an evaluation of model performance, if done, as well as the results of any relevant sensitivity analysis.                                 | Appendix pg. 149-153 (eTable 9)                                                                                                                                                                                                                           |
| 13                            | Describe methods for calculating uncertainty of the estimates. State which sources of uncertainty were, and were not, accounted for in the uncertainty analysis. | Appendix pg. 12                                                                                                                                                                                                                                           |
| 14                            | State how analytic or statistical source code used to generate estimates can be accessed.                                                                        | <a href="http://ghdx.healthdata.org/gbd-2019/code">http://ghdx.healthdata.org/gbd-2019/code</a>                                                                                                                                                           |
| <b>Results and Discussion</b> |                                                                                                                                                                  |                                                                                                                                                                                                                                                           |
| 15                            | Provide published estimates in a file format from which data can be efficiently extracted.                                                                       | GBD 2019 estimates are available online ( <a href="https://vizhub.healthdata.org/gbd-compare/">https://vizhub.healthdata.org/gbd-compare/</a> and <a href="http://ghdx.healthdata.org/gbd-results-tool">http://ghdx.healthdata.org/gbd-results-tool</a> ) |
| 16                            | Report a quantitative measure of the uncertainty of the estimates (e.g. uncertainty intervals).                                                                  | See main manuscript, “Results”                                                                                                                                                                                                                            |
| 17                            | Interpret results in light of existing evidence. If updating a previous set of estimates, describe the reasons for changes in estimates.                         | See main manuscript, “Discussion”                                                                                                                                                                                                                         |
| 18                            | Discuss limitations of the estimates. Include a discussion of any modelling assumptions or data limitations that affect interpretation of the estimates.         | See main manuscript, "Limitations"                                                                                                                                                                                                                        |

eTable 14: Contribution of YLDs and YLLs to DALYs by cancer, global, both sexes, 2019

| Cause                                   | Contribution YLDs, %<br>(95% UI) | Contribution YLLs, %<br>(95% UI) |
|-----------------------------------------|----------------------------------|----------------------------------|
| Total cancers                           | 3.1 (2.3 - 4.0)                  | 96.9 (96.0 - 97.7)               |
| Lip and oral cavity cancer              | 2.6 (1.9 - 3.4)                  | 97.4 (96.6 - 98.1)               |
| Nasopharynx cancer                      | 4.1 (2.9 - 5.6)                  | 95.9 (94.4 - 97.1)               |
| Other pharynx cancer                    | 1.5 (1.0 - 1.9)                  | 98.5 (98.1 - 99.0)               |
| Esophageal cancer                       | 1.3 (0.9 - 1.7)                  | 98.7 (98.3 - 99.1)               |
| Stomach cancer                          | 1.6 (1.1 - 2.0)                  | 98.4 (98.0 - 98.9)               |
| Colon and rectum cancer                 | 4.4 (3.2 - 5.6)                  | 95.6 (94.4 - 96.8)               |
| Liver cancer                            | 1.0 (0.7 - 1.4)                  | 99.0 (98.6 - 99.3)               |
| Gallbladder and biliary tract cancer    | 1.3 (1.0 - 1.7)                  | 98.7 (98.3 - 99.0)               |
| Pancreatic cancer                       | 0.9 (0.7 - 1.2)                  | 99.1 (98.8 - 99.3)               |
| Larynx cancer                           | 3.6 (2.6 - 4.6)                  | 96.4 (95.4 - 97.4)               |
| Tracheal, bronchus, and lung cancer     | 1.2 (0.9 - 1.5)                  | 98.8 (98.5 - 99.1)               |
| Malignant skin melanoma                 | 7.7 (5.5 - 10.1)                 | 92.3 (89.9 - 94.5)               |
| Non-melanoma skin cancer                | 10.6 (7.2 - 14.8)                | 89.4 (85.2 - 92.8)               |
| Breast cancer                           | 6.7 (4.8 - 8.9)                  | 93.3 (91.1 - 95.2)               |
| Cervical cancer                         | 2.7 (2.0 - 3.6)                  | 97.3 (96.4 - 98.0)               |
| Uterine cancer                          | 9.4 (6.8 - 12.2)                 | 90.6 (87.8 - 93.2)               |
| Ovarian cancer                          | 2.9 (2.1 - 3.6)                  | 97.1 (96.4 - 97.9)               |
| Prostate cancer                         | 10.4 (7.8 - 13.1)                | 89.6 (86.9 - 92.2)               |
| Testicular cancer                       | 9.5 (6.4 - 13.4)                 | 90.5 (86.6 - 93.6)               |
| Kidney cancer                           | 3.7 (2.7 - 4.9)                  | 96.3 (95.1 - 97.3)               |
| Bladder cancer                          | 6.2 (4.6 - 8.0)                  | 93.8 (92.0 - 95.4)               |
| Brain and central nervous system cancer | 1.5 (1.1 - 2.0)                  | 98.5 (98.0 - 98.9)               |
| Thyroid cancer                          | 9.2 (6.6 - 12.3)                 | 90.8 (87.7 - 93.4)               |
| Mesothelioma                            | 1.9 (1.3 - 2.4)                  | 98.1 (97.6 - 98.7)               |
| Hodgkin lymphoma                        | 4.1 (3.0 - 5.4)                  | 95.9 (94.6 - 97.0)               |
| Non-Hodgkin lymphoma                    | 4.0 (2.9 - 5.1)                  | 96.0 (94.9 - 97.1)               |
| Multiple myeloma                        | 3.8 (2.7 - 4.8)                  | 96.2 (95.2 - 97.3)               |
| Leukemia                                | 3.1 (2.3 - 4.0)                  | 96.9 (96.0 - 97.7)               |
| Acute lymphoid leukemia                 | 3.5 (2.6 - 4.7)                  | 96.5 (95.3 - 97.4)               |
| Chronic lymphoid leukemia               | 8.1 (6.0 - 10.3)                 | 91.9 (89.7 - 94.0)               |
| Acute myeloid leukemia                  | 1.1 (0.8 - 1.5)                  | 98.9 (98.5 - 99.2)               |
| Chronic myeloid leukemia                | 2.4 (1.7 - 3.2)                  | 97.6 (96.8 - 98.3)               |
| Other leukemia                          | 3.2 (2.4 - 4.2)                  | 96.8 (95.8 - 97.6)               |
| Other malignant neoplasms               | 2.8 (2.0 - 3.7)                  | 97.2 (96.3 - 98.0)               |

Abbreviations: 95% UI, 95% uncertainty interval; DALY, disability-adjusted life year; YLD, years lived with disability; YLL, years of life lost.

Footnote: "Total cancers" in this table includes non-melanoma skin cancer, and excludes the "Other neoplasms" category of benign and in situ neoplasms.

*eTable 15: Global number of incidence, prevalence, YLDs, deaths, YLLs, DALYs for both sexes, 2010 and 2019 for all level 2 GBD causes*

| <b>Measure</b> | <b>Cause Name</b>                            | <b>Number, 2010<br/>(95% UI)</b>                   | <b>Number, 2019<br/>(95% UI)</b>                   |
|----------------|----------------------------------------------|----------------------------------------------------|----------------------------------------------------|
| <b>DALYs</b>   | <b>Total cancers</b>                         | <b>216,000,000<br/>(208,000,000 - 223,000,000)</b> | <b>250,000,000<br/>(235,000,000 - 264,000,000)</b> |
| DALYs          | Cardiovascular diseases                      | 350,000,000<br>(335,000,000 - 363,000,000)         | 393,000,000<br>(368,000,000 - 417,000,000)         |
| DALYs          | Chronic respiratory diseases                 | 93,600,000<br>(86,200,000 - 100,000,000)           | 104,000,000<br>(94,800,000 - 112,000,000)          |
| DALYs          | Diabetes and kidney diseases                 | 87,700,000<br>(77,700,000 - 98,400,000)            | 113,000,000<br>(99,300,000 - 128,000,000)          |
| DALYs          | Digestive diseases                           | 83,600,000<br>(78,400,000 - 89,700,000)            | 89,000,000<br>(81,400,000 - 97,600,000)            |
| DALYs          | Enteric infections                           | 132,000,000<br>(113,000,000 - 156,000,000)         | 96,800,000<br>(79,200,000 - 120,000,000)           |
| DALYs          | HIV/AIDS and sexually transmitted infections | 86,000,000<br>(74,200,000 - 103,000,000)           | 56,200,000<br>(48,400,000 - 67,000,000)            |
| DALYs          | Maternal and neonatal disorders              | 244,000,000<br>(224,000,000 - 266,000,000)         | 199,000,000<br>(172,000,000 - 232,000,000)         |
| DALYs          | Mental disorders                             | 111,000,000<br>(82,300,000 - 146,000,000)          | 125,000,000<br>(93,000,000 - 163,000,000)          |
| DALYs          | Musculoskeletal disorders                    | 125,000,000<br>(90,800,000 - 165,000,000)          | 150,000,000<br>(109,000,000 - 198,000,000)         |
| DALYs          | Neglected tropical diseases and malaria      | 87,200,000<br>(55,700,000 - 124,000,000)           | 62,900,000<br>(38,600,000 - 96,000,000)            |
| DALYs          | Neurological disorders                       | 82,900,000<br>(46,500,000 - 135,000,000)           | 97,700,000<br>(55,900,000 - 159,000,000)           |

|               |                                         |                                                    |                                                      |
|---------------|-----------------------------------------|----------------------------------------------------|------------------------------------------------------|
| DALYs         | Nutritional deficiencies                | 55,400,000<br>(43,600,000 - 71,500,000)            | 49,800,000<br>(36,900,000 - 65,800,000)              |
| DALYs         | Other infectious diseases               | 78,700,000<br>(61,800,000 - 103,000,000)           | 51,400,000<br>(40,700,000 - 66,000,000)              |
| DALYs         | Other non-communicable diseases         | 151,000,000<br>(121,000,000 - 184,000,000)         | 153,000,000<br>(124,000,000 - 187,000,000)           |
| DALYs         | Respiratory infections and tuberculosis | 193,000,000<br>(177,000,000 - 211,000,000)         | 153,000,000<br>(137,000,000 - 172,000,000)           |
| DALYs         | Self-harm and interpersonal violence    | 69,600,000<br>(66,100,000 - 73,300,000)            | 67,900,000<br>(63,400,000 - 72,900,000)              |
| DALYs         | Sense organ diseases                    | 54,800,000<br>(37,600,000 - 77,000,000)            | 66,100,000<br>(45,100,000 - 93,000,000)              |
| DALYs         | Skin and subcutaneous diseases          | 39,100,000<br>(26,100,000 - 57,800,000)            | 42,900,000<br>(28,600,000 - 63,400,000)              |
| DALYs         | Substance use disorders                 | 30,900,000<br>(24,900,000 - 37,500,000)            | 35,100,000<br>(28,200,000 - 43,000,000)              |
| DALYs         | Transport injuries                      | 83,600,000<br>(74,100,000 - 90,400,000)            | 77,600,000<br>(69,200,000 - 85,500,000)              |
| DALYs         | Unintentional injuries                  | 120,000,000<br>(107,000,000 - 133,000,000)         | 104,000,000<br>(88,900,000 - 120,000,000)            |
| <b>Deaths</b> | <b>Total cancers</b>                    | <b>8,290,000</b><br><b>(7,890,000 - 8,570,000)</b> | <b>10,000,000</b><br><b>(9,360,000 - 10,600,000)</b> |
| Deaths        | Cardiovascular diseases                 | 15,800,000<br>(14,900,000 - 16,400,000)            | 18,600,000<br>(17,100,000 - 19,700,000)              |
| Deaths        | Chronic respiratory diseases            | 3,510,000<br>(3,200,000 - 3,690,000)               | 3,970,000<br>(3,580,000 - 4,300,000)                 |
| Deaths        | Diabetes and kidney diseases            | 2,290,000<br>(2,150,000 - 2,370,000)               | 2,990,000<br>(2,770,000 - 3,180,000)                 |

|        |                                              |                                      |                                      |
|--------|----------------------------------------------|--------------------------------------|--------------------------------------|
| Deaths | Digestive diseases                           | 2,300,000<br>(2,190,000 - 2,390,000) | 2,560,000<br>(2,390,000 - 2,720,000) |
| Deaths | Enteric infections                           | 2,190,000<br>(1,750,000 - 2,830,000) | 1,750,000<br>(1,290,000 - 2,420,000) |
| Deaths | HIV/AIDS and sexually transmitted infections | 1,460,000<br>(1,270,000 - 1,730,000) | 954,000<br>(849,000 - 1,110,000)     |
| Deaths | Maternal and neonatal disorders              | 2,670,000<br>(2,440,000 - 2,910,000) | 2,080,000<br>(1,780,000 - 2,450,000) |
| Deaths | Mental disorders                             | 287<br>(262 - 344)                   | 318<br>(286 - 386)                   |
| Deaths | Musculoskeletal disorders                    | 90,700<br>(72,200 - 104,000)         | 118,000<br>(94,800 - 136,000)        |
| Deaths | Neglected tropical diseases and malaria      | 1,030,000<br>(590,000 - 1,560,000)   | 747,000<br>(407,000 - 1,250,000)     |
| Deaths | Neurological disorders                       | 1,640,000<br>(783,000 - 3,530,000)   | 2,220,000<br>(1,030,000 - 4,760,000) |
| Deaths | Nutritional deficiencies                     | 322,000<br>(290,000 - 358,000)       | 252,000<br>(221,000 - 289,000)       |
| Deaths | Other infectious diseases                    | 1,040,000<br>(843,000 - 1,320,000)   | 730,000<br>(605,000 - 905,000)       |
| Deaths | Other non-communicable diseases              | 1,150,000<br>(985,000 - 1,320,000)   | 1,140,000<br>(1,010,000 - 1,300,000) |
| Deaths | Respiratory infections and tuberculosis      | 3,930,000<br>(3,690,000 - 4,170,000) | 3,680,000<br>(3,380,000 - 4,010,000) |
| Deaths | Self-harm and interpersonal violence         | 1,260,000<br>(1,190,000 - 1,320,000) | 1,250,000<br>(1,160,000 - 1,330,000) |
| Deaths | Sense organ diseases                         | NA                                   | NA                                   |
| Deaths | Skin and subcutaneous diseases               | 76,300                               | 98,500                               |

|                  |                                              |                                                       |                                                       |
|------------------|----------------------------------------------|-------------------------------------------------------|-------------------------------------------------------|
|                  |                                              | (58,700 - 96,400)                                     | (75,100 - 124,000)                                    |
| Deaths           | Substance use disorders                      | 252,000<br>(236,000 - 259,000)                        | 296,000<br>(273,000 - 311,000)                        |
| Deaths           | Transport injuries                           | 1,370,000<br>(1,190,000 - 1,440,000)                  | 1,280,000<br>(1,130,000 - 1,390,000)                  |
| Deaths           | Unintentional injuries                       | 1,970,000<br>(1,780,000 - 2,090,000)                  | 1,770,000<br>(1,550,000 - 1,950,000)                  |
| <b>Incidence</b> | <b>Total cancers</b>                         | <b>18,700,000</b><br><b>(18,000,000 - 19,300,000)</b> | <b>23,600,000</b><br><b>(22,200,000 - 24,900,000)</b> |
| Incidence        | Cardiovascular diseases                      | 44,500,000<br>(42,100,000 - 47,000,000)               | 55,500,000<br>(52,300,000 - 58,900,000)               |
| Incidence        | Chronic respiratory diseases                 | 64,600,000<br>(57,800,000 - 72,700,000)               | 77,600,000<br>(68,900,000 - 87,900,000)               |
| Incidence        | Diabetes and kidney diseases                 | 32,000,000<br>(30,500,000 - 33,500,000)               | 41,900,000<br>(39,800,000 - 44,300,000)               |
| Incidence        | Digestive diseases                           | 371,000,000<br>(339,000,000 - 405,000,000)            | 444,000,000<br>(406,000,000 - 484,000,000)            |
| Incidence        | Enteric infections                           | 5,350,000,000<br>(4,960,000,000 - 5,780,000,000)      | 6,600,000,000<br>(6,070,000,000 - 7,160,000,000)      |
| Incidence        | HIV/AIDS and sexually transmitted infections | 684,000,000<br>(586,000,000 - 794,000,000)            | 772,000,000<br>(661,000,000 - 895,000,000)            |
| Incidence        | Maternal and neonatal disorders              | 141,000,000<br>(128,000,000 - 155,000,000)            | 136,000,000<br>(123,000,000 - 150,000,000)            |
| Incidence        | Mental disorders                             | 325,000,000<br>(296,000,000 - 357,000,000)            | 371,000,000<br>(334,000,000 - 412,000,000)            |
| Incidence        | Musculoskeletal disorders                    | 277,000,000<br>(251,000,000 - 304,000,000)            | 323,000,000<br>(293,000,000 - 354,000,000)            |
| Incidence        | Neglected tropical diseases and malaria      | 319,000,000                                           | 290,000,000                                           |



|                   |                                         |                                                       |                                                       |
|-------------------|-----------------------------------------|-------------------------------------------------------|-------------------------------------------------------|
|                   |                                         | (274,000,000 - 378,000,000)                           | (231,000,000 - 365,000,000)                           |
| Incidence         | Neurological disorders                  | 720,000,000<br>(647,000,000 - 795,000,000)            | 805,000,000<br>(726,000,000 - 889,000,000)            |
| Incidence         | Nutritional deficiencies                | 146,000,000<br>(123,000,000 - 171,000,000)            | 162,000,000<br>(137,000,000 - 191,000,000)            |
| Incidence         | Other infectious diseases               | 409,000,000<br>(376,000,000 - 461,000,000)            | 384,000,000<br>(361,000,000 - 410,000,000)            |
| Incidence         | Other non-communicable diseases         | 5,160,000,000<br>(4,720,000,000 - 5,600,000,000)      | 5,710,000,000<br>(5,240,000,000 - 6,190,000,000)      |
| Incidence         | Respiratory infections and tuberculosis | 16,400,000,000<br>(14,700,000,000 - 18,400,000,000)   | 18,100,000,000<br>(16,300,000,000 - 20,200,000,000)   |
| Incidence         | Self-harm and interpersonal violence    | 46,900,000<br>(39,800,000 - 54,400,000)               | 47,400,000<br>(39,500,000 - 55,600,000)               |
| Incidence         | Sense organ diseases                    | 0<br>(0 - 0)                                          | 0<br>(0 - 0)                                          |
| Incidence         | Skin and subcutaneous diseases          | 4,260,000,000<br>(4,100,000,000 - 4,440,000,000)      | 4,860,000,000<br>(4,680,000,000 - 5,060,000,000)      |
| Incidence         | Substance use disorders                 | 64,100,000<br>(55,600,000 - 73,400,000)               | 69,700,000<br>(60,200,000 - 80,100,000)               |
| Incidence         | Transport injuries                      | 99,900,000<br>(85,600,000 - 115,000,000)              | 107,000,000<br>(90,000,000 - 125,000,000)             |
| Incidence         | Unintentional injuries                  | 488,000,000<br>(455,000,000 - 524,000,000)            | 560,000,000<br>(515,000,000 - 610,000,000)            |
| <b>Prevalence</b> | <b>Total cancers</b>                    | <b>66,700,000</b><br><b>(64,600,000 - 69,200,000)</b> | <b>85,800,000</b><br><b>(80,300,000 - 92,100,000)</b> |
| Prevalence        | Cardiovascular diseases                 | 413,000,000<br>(393,000,000 - 434,000,000)            | 523,000,000<br>(497,000,000 - 550,000,000)            |
| Prevalence        | Chronic respiratory diseases            | 386,000,000                                           | 455,000,000                                           |

|            |                                              |                                                  |                                                  |
|------------|----------------------------------------------|--------------------------------------------------|--------------------------------------------------|
|            |                                              | (359,000,000 - 422,000,000)                      | (417,000,000 - 499,000,000)                      |
| Prevalence | Diabetes and kidney diseases                 | 775,000,000<br>(739,000,000 - 811,000,000)       | 994,000,000<br>(947,000,000 - 1,040,000,000)     |
| Prevalence | Digestive diseases                           | 1,920,000,000<br>(1,820,000,000 - 2,020,000,000) | 2,280,000,000<br>(2,150,000,000 - 2,400,000,000) |
| Prevalence | Enteric infections                           | 80,600,000<br>(75,600,000 - 86,100,000)          | 98,800,000<br>(92,000,000 - 106,000,000)         |
| Prevalence | HIV/AIDS and sexually transmitted infections | 1,110,000,000<br>(997,000,000 - 1,240,000,000)   | 1,310,000,000<br>(1,170,000,000 - 1,460,000,000) |
| Prevalence | Maternal and neonatal disorders              | 91,500,000<br>(84,900,000 - 99,500,000)          | 112,000,000<br>(104,000,000 - 121,000,000)       |
| Prevalence | Mental disorders                             | 876,000,000<br>(813,000,000 - 943,000,000)       | 970,000,000<br>(901,000,000 - 1,040,000,000)     |
| Prevalence | Musculoskeletal disorders                    | 1,250,000,000<br>(1,180,000,000 - 1,320,000,000) | 1,510,000,000<br>(1,430,000,000 - 1,600,000,000) |
| Prevalence | Neglected tropical diseases and malaria      | 1,460,000,000<br>(1,390,000,000 - 1,540,000,000) | 1,310,000,000<br>(1,240,000,000 - 1,380,000,000) |
| Prevalence | Neurological disorders                       | 2,360,000,000<br>(2,170,000,000 - 2,540,000,000) | 2,660,000,000<br>(2,450,000,000 - 2,860,000,000) |
| Prevalence | Nutritional deficiencies                     | 1,190,000,000<br>(1,150,000,000 - 1,220,000,000) | 1,280,000,000<br>(1,240,000,000 - 1,320,000,000) |
| Prevalence | Other infectious diseases                    | 87,100,000<br>(84,400,000 - 90,100,000)          | 88,600,000<br>(86,100,000 - 91,400,000)          |
| Prevalence | Other non-communicable diseases              | 4,770,000,000<br>(4,620,000,000 - 4,920,000,000) | 5,370,000,000<br>(5,200,000,000 - 5,540,000,000) |
| Prevalence | Respiratory infections and tuberculosis      | 2,010,000,000<br>(1,860,000,000 - 2,170,000,000) | 2,110,000,000<br>(1,940,000,000 - 2,280,000,000) |
| Prevalence | Self-harm and interpersonal violence         | 351,000,000                                      | 393,000,000                                      |

|             |                                              |                                                    |                                                     |
|-------------|----------------------------------------------|----------------------------------------------------|-----------------------------------------------------|
|             |                                              | (312,000,000 - 398,000,000)                        | (349,000,000 - 445,000,000)                         |
| Prevalence  | Sense organ diseases                         | 1,450,000,000<br>(1,380,000,000 - 1,520,000,000)   | 1,760,000,000<br>(1,680,000,000 - 1,850,000,000)    |
| Prevalence  | Skin and subcutaneous diseases               | 1,790,000,000<br>(1,750,000,000 - 1,850,000,000)   | 2,020,000,000<br>(1,970,000,000 - 2,080,000,000)    |
| Prevalence  | Substance use disorders                      | 146,000,000<br>(132,000,000 - 163,000,000)         | 161,000,000<br>(145,000,000 - 181,000,000)          |
| Prevalence  | Transport injuries                           | 260,000,000<br>(242,000,000 - 277,000,000)         | 300,000,000<br>(280,000,000 - 321,000,000)          |
| Prevalence  | Unintentional injuries                       | 923,000,000<br>(862,000,000 - 990,000,000)         | 1,150,000,000<br>(1,070,000,000 - 1,230,000,000)    |
| <b>YLDs</b> | <b>Total cancers</b>                         | <b>6,190,000</b><br><b>(4,560,000 - 7,980,000)</b> | <b>7,840,000</b><br><b>(5,760,000 - 10,100,000)</b> |
| YLDs        | Cardiovascular diseases                      | 26,900,000<br>(19,600,000 - 34,300,000)            | 34,400,000<br>(24,900,000 - 43,600,000)             |
| YLDs        | Chronic respiratory diseases                 | 27,400,000<br>(22,100,000 - 32,600,000)            | 32,400,000<br>(26,100,000 - 38,500,000)             |
| YLDs        | Diabetes and kidney diseases                 | 33,400,000<br>(23,600,000 - 44,100,000)            | 45,400,000<br>(31,900,000 - 60,100,000)             |
| YLDs        | Digestive diseases                           | 14,500,000<br>(10,100,000 - 20,200,000)            | 17,000,000<br>(11,900,000 - 23,900,000)             |
| YLDs        | Enteric infections                           | 9,150,000<br>(6,330,000 - 12,500,000)              | 11,100,000<br>(7,710,000 - 15,300,000)              |
| YLDs        | HIV/AIDS and sexually transmitted infections | 4,960,000<br>(3,490,000 - 6,960,000)               | 5,010,000<br>(3,550,000 - 6,730,000)                |
| YLDs        | Maternal and neonatal disorders              | 14,400,000<br>(11,400,000 - 17,900,000)            | 20,000,000<br>(15,900,000 - 24,200,000)             |
| YLDs        | Mental disorders                             | 111,000,000                                        | 125,000,000                                         |

|                                  |                                         |                                           |                                            |
|----------------------------------|-----------------------------------------|-------------------------------------------|--------------------------------------------|
|                                  |                                         | (82,300,000 - 146,000,000)                | (93,000,000 - 163,000,000)                 |
| YLDs                             | Musculoskeletal disorders               | 123,000,000<br>(88,400,000 - 163,000,000) | 147,000,000<br>(106,000,000 - 195,000,000) |
| YLDs                             | Neglected tropical diseases and malaria | 14,800,000<br>(10,400,000 - 20,600,000)   | 13,700,000<br>(9,720,000 - 19,100,000)     |
| YLDs                             | Neurological disorders                  | 56,800,000<br>(23,900,000 - 108,000,000)  | 65,600,000<br>(28,600,000 - 123,000,000)   |
| YLDs                             | Nutritional deficiencies                | 36,200,000<br>(24,200,000 - 51,600,000)   | 37,600,000<br>(25,200,000 - 53,500,000)    |
| YLDs                             | Other infectious diseases               | 3,600,000<br>(2,520,000 - 4,910,000)      | 3,650,000<br>(2,570,000 - 5,010,000)       |
| YLDs                             | Other non-communicable diseases         | 76,000,000<br>(52,600,000 - 106,000,000)  | 87,500,000<br>(60,500,000 - 123,000,000)   |
| YLDs                             | Respiratory infections and tuberculosis | 12,600,000<br>(8,610,000 - 17,600,000)    | 13,300,000<br>(9,080,000 - 18,600,000)     |
| YLDs                             | Self-harm and interpersonal violence    | 7,540,000<br>(5,680,000 - 9,780,000)      | 8,300,000<br>(6,310,000 - 10,700,000)      |
| YLDs                             | Sense organ diseases                    | 54,800,000<br>(37,600,000 - 77,000,000)   | 66,100,000<br>(45,100,000 - 93,000,000)    |
| YLDs                             | Skin and subcutaneous diseases          | 37,100,000<br>(24,200,000 - 55,900,000)   | 40,600,000<br>(26,400,000 - 61,300,000)    |
| YLDs                             | Substance use disorders                 | 20,400,000<br>(14,400,000 - 27,100,000)   | 23,000,000<br>(16,200,000 - 30,500,000)    |
| YLDs                             | Transport injuries                      | 15,800,000<br>(11,500,000 - 20,900,000)   | 17,800,000<br>(13,000,000 - 23,700,000)    |
| YLDs                             | Unintentional injuries                  | 30,400,000<br>(21,500,000 - 42,200,000)   | 37,800,000<br>(26,700,000 - 52,200,000)    |
| <b>YLLs (Years of Life Lost)</b> | <b>Total cancers</b>                    | <b>209,000,000</b>                        | <b>242,000,000</b>                         |

|                           |                                              | <b>(202,000,000 - 216,000,000)</b>         | <b>(227,000,000 - 256,000,000)</b>         |
|---------------------------|----------------------------------------------|--------------------------------------------|--------------------------------------------|
| YLLs (Years of Life Lost) | Cardiovascular diseases                      | 323,000,000<br>(309,000,000 - 334,000,000) | 359,000,000<br>(335,000,000 - 380,000,000) |
| YLLs (Years of Life Lost) | Chronic respiratory diseases                 | 66,100,000<br>(61,100,000 - 69,500,000)    | 71,100,000<br>(64,700,000 - 77,000,000)    |
| YLLs (Years of Life Lost) | Diabetes and kidney diseases                 | 54,200,000<br>(52,000,000 - 56,300,000)    | 67,300,000<br>(63,000,000 - 71,700,000)    |
| YLLs (Years of Life Lost) | Digestive diseases                           | 69,100,000<br>(66,400,000 - 72,000,000)    | 72,000,000<br>(67,000,000 - 77,100,000)    |
| YLLs (Years of Life Lost) | Enteric infections                           | 123,000,000<br>(104,000,000 - 146,000,000) | 85,700,000<br>(68,000,000 - 108,000,000)   |
| YLLs (Years of Life Lost) | HIV/AIDS and sexually transmitted infections | 81,000,000<br>(68,400,000 - 98,000,000)    | 51,200,000<br>(43,500,000 - 62,000,000)    |
| YLLs (Years of Life Lost) | Maternal and neonatal disorders              | 230,000,000<br>(210,000,000 - 251,000,000) | 179,000,000<br>(153,000,000 - 211,000,000) |
| YLLs (Years of Life Lost) | Mental disorders                             | 15,800<br>(14,400 - 19,200)                | 17,400<br>(15,500 - 21,500)                |
| YLLs (Years of Life Lost) | Musculoskeletal disorders                    | 2,350,000<br>(1,920,000 - 2,750,000)       | 2,790,000<br>(2,290,000 - 3,310,000)       |
| YLLs (Years of Life Lost) | Neglected tropical diseases and malaria      | 72,400,000<br>(41,300,000 - 111,000,000)   | 49,200,000<br>(26,400,000 - 83,100,000)    |
| YLLs (Years of Life Lost) | Neurological disorders                       | 26,100,000<br>(16,300,000 - 48,100,000)    | 32,100,000<br>(18,800,000 - 60,800,000)    |
| YLLs (Years of Life Lost) | Nutritional deficiencies                     | 19,300,000<br>(16,500,000 - 22,100,000)    | 12,200,000<br>(10,000,000 - 15,000,000)    |
| YLLs (Years of Life Lost) | Other infectious diseases                    | 75,200,000<br>(58,600,000 - 99,100,000)    | 47,800,000<br>(37,300,000 - 62,400,000)    |
| YLLs (Years of Life Lost) | Other non-communicable diseases              | 75,400,000                                 | 65,700,000                                 |

|                           |                                         |                                            |                                            |
|---------------------------|-----------------------------------------|--------------------------------------------|--------------------------------------------|
|                           |                                         | (60,700,000 - 91,600,000)                  | (55,000,000 - 78,900,000)                  |
| YLLs (Years of Life Lost) | Respiratory infections and tuberculosis | 181,000,000<br>(165,000,000 - 198,000,000) | 140,000,000<br>(125,000,000 - 159,000,000) |
| YLLs (Years of Life Lost) | Self-harm and interpersonal violence    | 62,000,000<br>(58,700,000 - 65,000,000)    | 59,600,000<br>(55,400,000 - 63,700,000)    |
| YLLs (Years of Life Lost) | Sense organ diseases                    | NA                                         | NA                                         |
| YLLs (Years of Life Lost) | Skin and subcutaneous diseases          | 1,950,000<br>(1,480,000 - 2,340,000)       | 2,260,000<br>(1,690,000 - 2,680,000)       |
| YLLs (Years of Life Lost) | Substance use disorders                 | 10,500,000<br>(9,850,000 - 10,800,000)     | 12,200,000<br>(11,200,000 - 12,800,000)    |
| YLLs (Years of Life Lost) | Transport injuries                      | 67,900,000<br>(59,500,000 - 71,900,000)    | 59,800,000<br>(52,900,000 - 65,300,000)    |
| YLLs (Years of Life Lost) | Unintentional injuries                  | 89,300,000<br>(80,700,000 - 95,400,000)    | 65,800,000<br>(57,400,000 - 73,300,000)    |

Abbreviations: 95% UI, 95% uncertainty interval; DALYs, disability-adjusted life years; GBD, Global Burden of Disease; NA, not applicable; YLDs, years lived with disability; YLLs, years of life lost.

Footnote: "Total cancers" in this table includes non-melanoma skin cancer, and excludes the "Other neoplasms" category of benign and in situ neoplasms. For "sense organ diseases", incidence, death, and YLLs were not estimated for GBD 2019.

eTable 16: Trends in incidence globally, and by SDI quintile, both sexes, 2010 to 2019

| Cause                      | Location        | Incidence 2010, thousands (95% UI) | Incidence 2019, thousands (95% UI) | Annualized Rate of Change 2010-2019, Counts (95% UI) | Age-standardized Incidence 2010, per 100,000 (95% UI) | Age-standardized Incidence 2019, per 100,000 (95% UI) | Annualized Rate of Change 2010-2019, Age-standardized rate (95% UI) |
|----------------------------|-----------------|------------------------------------|------------------------------------|------------------------------------------------------|-------------------------------------------------------|-------------------------------------------------------|---------------------------------------------------------------------|
| Total cancers              | Global          | 18 700<br>(18 000 to 19 300)       | 23 600<br>(22 200 to 24 900)       | 2.6<br>(2.1 to 3.1)                                  | 293.8<br>(283.4 to 303.4)                             | 290.5<br>(274.0 to 307.1)                             | -0.1<br>(-0.7 to 0.4)                                               |
| Total cancers              | High SDI        | 8 930<br>(8 540 to 9 310)          | 10 900<br>(10 200 to 11 600)       | 2.2<br>(1.8 to 2.7)                                  | 598.2<br>(572.6 to 622.6)                             | 605.3<br>(568.0 to 645.0)                             | 0.1<br>(-0.4 to 0.6)                                                |
| Total cancers              | High-middle SDI | 4 280<br>(4 130 to 4 440)          | 5 220<br>(4 810 to 5 620)          | 2.2<br>(1.3 to 3.1)                                  | 267.1<br>(257.2 to 276.9)                             | 264.5<br>(243.4 to 284.4)                             | -0.1<br>(-1.0 to 0.7)                                               |
| Total cancers              | Middle SDI      | 3 550<br>(3 380 to 3 720)          | 4 810<br>(4 380 to 5 230)          | 3.4<br>(2.3 to 4.3)                                  | 186.6<br>(177.5 to 195.0)                             | 193.3<br>(176.6 to 209.9)                             | 0.4<br>(-0.6 to 1.3)                                                |
| Total cancers              | Low-middle SDI  | 1 370<br>(1 300 to 1 450)          | 1 920<br>(1 780 to 2 070)          | 3.7<br>(3.0 to 4.5)                                  | 125.0<br>(118.4 to 132.2)                             | 135.6<br>(125.5 to 146.0)                             | 0.9<br>(0.2 to 1.6)                                                 |
| Total cancers              | Low SDI         | 513<br>(462 to 563)                | 700<br>(627 to 778)                | 3.5<br>(2.6 to 4.4)                                  | 114.0<br>(102.9 to 124.0)                             | 118.2<br>(106.1 to 130.6)                             | 0.4<br>(-0.3 to 1.1)                                                |
| Total Cancers (excl. NMSC) | Global          | 13 800<br>(13 300 to 14 300)       | 17 200<br>(15 900 to 18 500)       | 2.4<br>(1.7 to 3.1)                                  | 214.8<br>(205.4 to 221.9)                             | 211.4<br>(195.4 to 226.8)                             | -0.2<br>(-0.9 to 0.5)                                               |
| Total Cancers (excl. NMSC) | High SDI        | 4 830<br>(4 580 to 5 040)          | 5 560<br>(5 020 to 6 090)          | 1.6<br>(0.7 to 2.4)                                  | 329.6<br>(314.5 to 343.3)                             | 316.7<br>(287.4 to 346.7)                             | -0.4<br>(-1.3 to 0.4)                                               |
| Total Cancers (excl. NMSC) | High-middle SDI | 3 860<br>(3 710 to 4 010)          | 4 690<br>(4 290 to 5 090)          | 2.2<br>(1.2 to 3.1)                                  | 240.7<br>(230.4 to 249.8)                             | 238.2<br>(217.7 to 258.3)                             | -0.1<br>(-1.1 to 0.8)                                               |
| Total Cancers (excl. NMSC) | Middle SDI      | 3 320<br>(3 150 to 3 480)          | 4 470<br>(4 050 to 4 890)          | 3.3<br>(2.1 to 4.3)                                  | 173.8<br>(164.6 to 182.3)                             | 179.3<br>(162.7 to 196.1)                             | 0.3<br>(-0.8 to 1.4)                                                |
| Total Cancers (excl. NMSC) | Low-middle SDI  | 1 300<br>(1 220 to 1 380)          | 1 810<br>(1 670 to 1 960)          | 3.7<br>(2.9 to 4.5)                                  | 117.3<br>(110.8 to 124.5)                             | 127.2<br>(117.3 to 137.8)                             | 0.9<br>(0.1 to 1.7)                                                 |
| Total Cancers (excl. NMSC) | Low SDI         | 496<br>(444 to 546)                | 678<br>(604 to 755)                | 3.5<br>(2.6 to 4.4)                                  | 109.6<br>(98.8 to 119.5)                              | 114.1<br>(102.1 to 126.2)                             | 0.4<br>(-0.3 to 1.2)                                                |
| Lip and oral cavity cancer | Global          | 290<br>(280 to 302)                | 373<br>(341 to 404)                | 2.8<br>(1.8 to 3.7)                                  | 4.4<br>(4.2 to 4.6)                                   | 4.5<br>(4.1 to 4.9)                                   | 0.2<br>(-0.7 to 1.1)                                                |

|                            |                 |                        |                        |                     |                     |                     |                       |
|----------------------------|-----------------|------------------------|------------------------|---------------------|---------------------|---------------------|-----------------------|
| Lip and oral cavity cancer | High SDI        | 71.7<br>(68.6 to 73.6) | 80.5<br>(72.6 to 88.7) | 1.3<br>(0.2 to 2.3) | 5.0<br>(4.8 to 5.1) | 4.7<br>(4.3 to 5.2) | -0.6<br>(-1.7 to 0.4) |
| Lip and oral cavity cancer | High-middle SDI | 60.9<br>(58.7 to 63.0) | 71.6<br>(64.8 to 78.1) | 1.8<br>(0.8 to 2.8) | 3.7<br>(3.6 to 3.8) | 3.6<br>(3.2 to 3.9) | -0.5<br>(-1.5 to 0.5) |
| Lip and oral cavity cancer | Middle SDI      | 68.8<br>(65.0 to 74.3) | 94.4<br>(82.9 to 106)  | 3.5<br>(2.3 to 4.7) | 3.5<br>(3.3 to 3.8) | 3.7<br>(3.3 to 4.2) | 0.6<br>(-0.6 to 1.8)  |
| Lip and oral cavity cancer | Low-middle SDI  | 66.9<br>(62.6 to 71.6) | 95.6<br>(83.3 to 108)  | 4.0<br>(2.4 to 5.4) | 6.0<br>(5.6 to 6.4) | 6.7<br>(5.8 to 7.5) | 1.1<br>(-0.4 to 2.6)  |
| Lip and oral cavity cancer | Low SDI         | 21.8<br>(19.4 to 24.3) | 30.8<br>(27.2 to 34.7) | 3.8<br>(2.2 to 5.4) | 5.0<br>(4.5 to 5.6) | 5.4<br>(4.8 to 6.0) | 0.7<br>(-0.9 to 2.2)  |
| Nasopharynx cancer         | Global          | 128<br>(120 to 138)    | 177<br>(156 to 200)    | 3.6<br>(2.0 to 5.1) | 1.9<br>(1.7 to 2.0) | 2.1<br>(1.9 to 2.4) | 1.4<br>(-0.1 to 3.0)  |
| Nasopharynx cancer         | High SDI        | 17.0<br>(16.3 to 17.6) | 19.3<br>(17.3 to 21.5) | 1.4<br>(0.2 to 2.5) | 1.3<br>(1.2 to 1.3) | 1.3<br>(1.2 to 1.4) | -0.0<br>(-1.2 to 1.2) |
| Nasopharynx cancer         | High-middle SDI | 48.8<br>(43.9 to 54.7) | 68.1<br>(56.5 to 81.6) | 3.7<br>(1.3 to 6.1) | 3.0<br>(2.7 to 3.3) | 3.6<br>(3.0 to 4.3) | 2.1<br>(-0.3 to 4.5)  |
| Nasopharynx cancer         | Middle SDI      | 44.7<br>(41.0 to 49.2) | 66.5<br>(57.4 to 76.9) | 4.4<br>(2.5 to 6.4) | 2.1<br>(1.9 to 2.3) | 2.5<br>(2.2 to 2.9) | 2.0<br>(0.1 to 3.9)   |
| Nasopharynx cancer         | Low-middle SDI  | 12.9<br>(11.9 to 14.1) | 16.7<br>(15.1 to 18.5) | 2.8<br>(1.7 to 3.9) | 1.1<br>(1.0 to 1.2) | 1.1<br>(1.0 to 1.2) | 0.1<br>(-1.0 to 1.2)  |
| Nasopharynx cancer         | Low SDI         | 4.62<br>(4.12 to 5.13) | 5.90<br>(5.20 to 6.59) | 2.7<br>(1.4 to 4.1) | 1.0<br>(0.9 to 1.1) | 0.9<br>(0.8 to 1.0) | -0.4<br>(-1.6 to 0.9) |
| Other pharynx cancer       | Global          | 126<br>(122 to 131)    | 167<br>(153 to 180)    | 3.1<br>(2.2 to 3.9) | 1.9<br>(1.8 to 2.0) | 2.0<br>(1.8 to 2.2) | 0.5<br>(-0.4 to 1.3)  |
| Other pharynx cancer       | High SDI        | 38.8<br>(37.7 to 39.7) | 45.8<br>(41.1 to 51.3) | 1.8<br>(0.7 to 3.0) | 2.7<br>(2.7 to 2.8) | 2.8<br>(2.5 to 3.1) | 0.0<br>(-1.2 to 1.3)  |
| Other pharynx cancer       | High-middle SDI | 25.3<br>(24.7 to 25.9) | 32.1<br>(29.3 to 34.8) | 2.6<br>(1.6 to 3.6) | 1.5<br>(1.5 to 1.6) | 1.6<br>(1.4 to 1.7) | 0.3<br>(-0.7 to 1.3)  |
| Other pharynx cancer       | Middle SDI      | 21.6<br>(20.3 to 23.1) | 31.4<br>(27.4 to 35.2) | 4.1<br>(2.8 to 5.3) | 1.1<br>(1.0 to 1.2) | 1.2<br>(1.1 to 1.3) | 1.1<br>(-0.2 to 2.3)  |
| Other pharynx cancer       | Low-middle SDI  | 33.7<br>(30.9 to 36.4) | 47.7<br>(40.9 to 54.9) | 3.9<br>(2.1 to 5.5) | 3.1<br>(2.8 to 3.3) | 3.3<br>(2.9 to 3.8) | 1.0<br>(-0.8 to 2.6)  |
| Other pharynx cancer       | Low SDI         | 6.99<br>(6.10 to 7.84) | 9.91<br>(8.44 to 11.6) | 3.9<br>(2.2 to 5.6) | 1.7<br>(1.5 to 1.9) | 1.8<br>(1.5 to 2.1) | 0.8<br>(-0.8 to 2.4)  |



|                         |                 |                           |                           |                      |                        |                        |                        |
|-------------------------|-----------------|---------------------------|---------------------------|----------------------|------------------------|------------------------|------------------------|
| Esophageal cancer       | Global          | 479<br>(391 to 513)       | 535<br>(467 to 595)       | 1.2<br>(-0.2 to 2.6) | 7.5<br>(6.1 to 8.0)    | 6.5<br>(5.7 to 7.2)    | -1.6<br>(-2.9 to -0.2) |
| Esophageal cancer       | High SDI        | 84.2<br>(80.1 to 87.1)    | 95.9<br>(86.7 to 105)     | 1.4<br>(0.5 to 2.4)  | 5.5<br>(5.3 to 5.7)    | 5.2<br>(4.7 to 5.7)    | -0.7<br>(-1.7 to 0.3)  |
| Esophageal cancer       | High-middle SDI | 127<br>(95.6 to 139)      | 145<br>(113 to 169)       | 1.5<br>(-0.3 to 3.2) | 7.7<br>(5.8 to 8.5)    | 7.1<br>(5.5 to 8.2)    | -1.0<br>(-2.9 to 0.6)  |
| Esophageal cancer       | Middle SDI      | 200<br>(132 to 222)       | 205<br>(165 to 238)       | 0.3<br>(-1.7 to 3.0) | 11.1<br>(7.2 to 12.3)  | 8.4<br>(6.7 to 9.7)    | -3.0<br>(-4.9 to -0.3) |
| Esophageal cancer       | Low-middle SDI  | 46.8<br>(42.7 to 64.8)    | 59.9<br>(52.7 to 84.1)    | 2.7<br>(1.6 to 3.7)  | 4.5<br>(4.1 to 6.3)    | 4.4<br>(3.9 to 6.2)    | -0.4<br>(-1.4 to 0.6)  |
| Esophageal cancer       | Low SDI         | 21.5<br>(18.5 to 24.8)    | 28.1<br>(23.2 to 33.4)    | 3.0<br>(1.8 to 4.1)  | 5.6<br>(4.8 to 6.4)    | 5.4<br>(4.5 to 6.4)    | -0.3<br>(-1.4 to 0.7)  |
| Stomach cancer          | Global          | 1 160<br>(1 090 to 1 220) | 1 270<br>(1 150 to 1 400) | 1.0<br>(-0.1 to 2.1) | 18.3<br>(17.1 to 19.2) | 15.6<br>(14.1 to 17.2) | -1.8<br>(-2.8 to -0.7) |
| Stomach cancer          | High SDI        | 234<br>(215 to 243)       | 238<br>(210 to 261)       | 0.2<br>(-0.7 to 1.1) | 15.0<br>(14.0 to 15.6) | 12.4<br>(11.1 to 13.6) | -2.1<br>(-3.0 to -1.2) |
| Stomach cancer          | High-middle SDI | 356<br>(332 to 378)       | 381<br>(337 to 427)       | 0.8<br>(-0.7 to 2.1) | 21.9<br>(20.4 to 23.2) | 18.8<br>(16.6 to 21.0) | -1.7<br>(-3.1 to -0.3) |
| Stomach cancer          | Middle SDI      | 411<br>(381 to 443)       | 458<br>(399 to 527)       | 1.2<br>(-0.4 to 2.8) | 22.4<br>(20.8 to 24.1) | 18.7<br>(16.4 to 21.4) | -2.0<br>(-3.6 to -0.5) |
| Stomach cancer          | Low-middle SDI  | 124<br>(117 to 132)       | 149<br>(136 to 163)       | 2.0<br>(1.1 to 2.9)  | 12.0<br>(11.3 to 12.7) | 11.0<br>(10.0 to 12.0) | -1.0<br>(-1.9 to -0.1) |
| Stomach cancer          | Low SDI         | 35.6<br>(32.0 to 39.2)    | 43.2<br>(38.6 to 48.1)    | 2.1<br>(1.4 to 2.9)  | 9.3<br>(8.4 to 10.2)   | 8.4<br>(7.6 to 9.3)    | -1.1<br>(-1.8 to -0.4) |
| Colon and rectum cancer | Global          | 1 640<br>(1 560 to 1 700) | 2 170<br>(2 000 to 2 340) | 3.1<br>(2.4 to 3.8)  | 26.1<br>(24.7 to 27.1) | 26.7<br>(24.6 to 28.9) | 0.2<br>(-0.5 to 1.0)   |
| Colon and rectum cancer | High SDI        | 678<br>(632 to 701)       | 799<br>(716 to 873)       | 1.8<br>(1.0 to 2.7)  | 43.9<br>(41.4 to 45.3) | 42.8<br>(38.7 to 46.6) | -0.3<br>(-1.2 to 0.6)  |
| Colon and rectum cancer | High-middle SDI | 502<br>(480 to 522)       | 657<br>(596 to 718)       | 3.0<br>(2.0 to 4.0)  | 31.1<br>(29.6 to 32.3) | 32.5<br>(29.5 to 35.4) | 0.5<br>(-0.5 to 1.5)   |
| Colon and rectum cancer | Middle SDI      | 338<br>(316 to 360)       | 518<br>(464 to 578)       | 4.7<br>(3.5 to 5.9)  | 18.2<br>(17.0 to 19.3) | 20.9<br>(18.8 to 23.3) | 1.6<br>(0.4 to 2.7)    |
| Colon and rectum cancer | Low-middle SDI  | 95.8<br>(90.3 to 102)     | 153<br>(139 to 168)       | 5.2<br>(4.2 to 6.1)  | 9.4<br>(8.8 to 10.0)   | 11.4<br>(10.3 to 12.4) | 2.1<br>(1.1 to 3.0)    |

|                                      |                 |                        |                        |                     |                       |                       |                        |
|--------------------------------------|-----------------|------------------------|------------------------|---------------------|-----------------------|-----------------------|------------------------|
| Colon and rectum cancer              | Low SDI         | 25.7<br>(22.9 to 29.1) | 39.0<br>(34.9 to 43.4) | 4.7<br>(3.6 to 5.7) | 6.8<br>(6.1 to 7.8)   | 7.7<br>(6.9 to 8.6)   | 1.4<br>(0.3 to 2.4)    |
| Liver cancer                         | Global          | 420<br>(399 to 441)    | 534<br>(487 to 589)    | 2.7<br>(1.6 to 3.7) | 6.5<br>(6.2 to 6.8)   | 6.5<br>(5.9 to 7.2)   | 0.0<br>(-1.0 to 1.1)   |
| Liver cancer                         | High SDI        | 121<br>(113 to 126)    | 140<br>(126 to 154)    | 1.6<br>(0.6 to 2.6) | 8.0<br>(7.5 to 8.3)   | 7.6<br>(6.9 to 8.4)   | -0.6<br>(-1.6 to 0.5)  |
| Liver cancer                         | High-middle SDI | 89.1<br>(83.2 to 95.4) | 107<br>(94.2 to 121)   | 2.0<br>(0.5 to 3.6) | 5.5<br>(5.1 to 5.8)   | 5.3<br>(4.7 to 6.0)   | -0.2<br>(-1.8 to 1.3)  |
| Liver cancer                         | Middle SDI      | 152<br>(142 to 165)    | 211<br>(184 to 242)    | 3.6<br>(2.0 to 5.3) | 7.8<br>(7.3 to 8.5)   | 8.3<br>(7.2 to 9.5)   | 0.6<br>(-1.0 to 2.2)   |
| Liver cancer                         | Low-middle SDI  | 41.4<br>(38.1 to 44.6) | 56.3<br>(51.0 to 62.6) | 3.4<br>(2.4 to 4.5) | 3.9<br>(3.6 to 4.2)   | 4.1<br>(3.7 to 4.5)   | 0.5<br>(-0.6 to 1.5)   |
| Liver cancer                         | Low SDI         | 16.0<br>(14.4 to 17.6) | 20.3<br>(17.8 to 22.8) | 2.6<br>(1.6 to 3.6) | 3.9<br>(3.5 to 4.3)   | 3.7<br>(3.3 to 4.1)   | -0.6<br>(-1.6 to 0.3)  |
| Gallbladder and biliary tract cancer | Global          | 165<br>(141 to 174)    | 199<br>(167 to 220)    | 2.1<br>(1.3 to 2.9) | 2.7<br>(2.3 to 2.8)   | 2.5<br>(2.1 to 2.7)   | -0.8<br>(-1.7 to -0.0) |
| Gallbladder and biliary tract cancer | High SDI        | 56.4<br>(45.5 to 60.5) | 63.8<br>(52.1 to 72.3) | 1.4<br>(0.5 to 2.2) | 3.5<br>(2.8 to 3.7)   | 3.2<br>(2.6 to 3.6)   | -1.1<br>(-1.9 to -0.2) |
| Gallbladder and biliary tract cancer | High-middle SDI | 44.6<br>(33.8 to 47.8) | 50.8<br>(37.7 to 57.5) | 1.4<br>(0.3 to 2.6) | 2.8<br>(2.1 to 3.0)   | 2.5<br>(1.9 to 2.8)   | -1.2<br>(-2.4 to -0.1) |
| Gallbladder and biliary tract cancer | Middle SDI      | 35.8<br>(32.1 to 39.7) | 45.8<br>(39.6 to 53.4) | 2.7<br>(1.5 to 4.0) | 2.0<br>(1.8 to 2.3)   | 1.9<br>(1.7 to 2.2)   | -0.6<br>(-1.9 to 0.7)  |
| Gallbladder and biliary tract cancer | Low-middle SDI  | 21.4<br>(19.0 to 24.9) | 29.6<br>(26.0 to 33.9) | 3.6<br>(2.4 to 4.8) | 2.1<br>(1.9 to 2.5)   | 2.2<br>(2.0 to 2.6)   | 0.5<br>(-0.7 to 1.6)   |
| Gallbladder and biliary tract cancer | Low SDI         | 6.75<br>(5.50 to 7.90) | 9.11<br>(7.68 to 10.5) | 3.3<br>(2.2 to 4.8) | 1.8<br>(1.5 to 2.1)   | 1.9<br>(1.6 to 2.1)   | 0.2<br>(-0.9 to 1.6)   |
| Pancreatic cancer                    | Global          | 391<br>(369 to 406)    | 530<br>(486 to 574)    | 3.4<br>(2.7 to 4.1) | 6.3<br>(5.9 to 6.5)   | 6.6<br>(6.0 to 7.1)   | 0.5<br>(-0.3 to 1.2)   |
| Pancreatic cancer                    | High SDI        | 159<br>(147 to 165)    | 197<br>(175 to 216)    | 2.4<br>(1.5 to 3.2) | 10.1<br>(9.4 to 10.4) | 10.2<br>(9.1 to 11.1) | 0.1<br>(-0.8 to 1.0)   |
| Pancreatic cancer                    | High-middle SDI | 121<br>(115 to 126)    | 157<br>(143 to 170)    | 2.9<br>(1.9 to 3.8) | 7.5<br>(7.1 to 7.8)   | 7.7<br>(7.0 to 8.3)   | 0.3<br>(-0.7 to 1.2)   |
| Pancreatic cancer                    | Middle SDI      | 75.3<br>(70.4 to 80.8) | 117<br>(105 to 131)    | 4.9<br>(3.9 to 5.9) | 4.2<br>(3.9 to 4.4)   | 4.8<br>(4.3 to 5.3)   | 1.6<br>(0.6 to 2.6)    |

|                                     |                 |                           |                           |                     |                        |                        |                        |
|-------------------------------------|-----------------|---------------------------|---------------------------|---------------------|------------------------|------------------------|------------------------|
| Pancreatic cancer                   | Low-middle SDI  | 27.9<br>(26.0 to 29.8)    | 46.9<br>(43.0 to 51.0)    | 5.8<br>(4.7 to 6.8) | 2.8<br>(2.6 to 3.0)    | 3.5<br>(3.2 to 3.8)    | 2.6<br>(1.6 to 3.6)    |
| Pancreatic cancer                   | Low SDI         | 7.80<br>(6.61 to 8.97)    | 12.6<br>(11.0 to 14.2)    | 5.3<br>(4.1 to 6.5) | 2.1<br>(1.8 to 2.4)    | 2.5<br>(2.2 to 2.9)    | 2.0<br>(0.9 to 3.2)    |
| Larynx cancer                       | Global          | 168<br>(162 to 173)       | 209<br>(194 to 225)       | 2.5<br>(1.6 to 3.3) | 2.6<br>(2.5 to 2.7)    | 2.5<br>(2.3 to 2.7)    | -0.3<br>(-1.1 to 0.5)  |
| Larynx cancer                       | High SDI        | 38.6<br>(37.2 to 39.5)    | 43.7<br>(39.3 to 48.5)    | 1.4<br>(0.2 to 2.5) | 2.6<br>(2.5 to 2.7)    | 2.5<br>(2.2 to 2.8)    | -0.6<br>(-1.8 to 0.5)  |
| Larynx cancer                       | High-middle SDI | 50.2<br>(48.5 to 51.7)    | 57.9<br>(52.6 to 63.5)    | 1.6<br>(0.5 to 2.6) | 3.0<br>(2.9 to 3.1)    | 2.8<br>(2.5 to 3.1)    | -0.9<br>(-1.9 to 0.1)  |
| Larynx cancer                       | Middle SDI      | 40.4<br>(38.2 to 42.9)    | 57.1<br>(51.5 to 63.5)    | 3.9<br>(2.6 to 5.1) | 2.1<br>(2.0 to 2.2)    | 2.2<br>(2.0 to 2.5)    | 0.6<br>(-0.6 to 1.8)   |
| Larynx cancer                       | Low-middle SDI  | 28.7<br>(26.5 to 31.1)    | 38.0<br>(33.9 to 42.5)    | 3.1<br>(1.8 to 4.4) | 2.7<br>(2.5 to 2.9)    | 2.7<br>(2.4 to 3.0)    | 0.1<br>(-1.2 to 1.4)   |
| Larynx cancer                       | Low SDI         | 9.74<br>(8.58 to 11.0)    | 12.3<br>(10.7 to 14.1)    | 2.6<br>(1.1 to 4.2) | 2.4<br>(2.1 to 2.7)    | 2.3<br>(2.0 to 2.6)    | -0.6<br>(-2.0 to 0.9)  |
| Tracheal, bronchus, and lung cancer | Global          | 1 830<br>(1 750 to 1 910) | 2 260<br>(2 070 to 2 450) | 2.3<br>(1.3 to 3.2) | 29.0<br>(27.6 to 30.2) | 27.7<br>(25.3 to 30.0) | -0.5<br>(-1.5 to 0.4)  |
| Tracheal, bronchus, and lung cancer | High SDI        | 634<br>(599 to 653)       | 709<br>(637 to 773)       | 1.2<br>(0.4 to 2.2) | 40.9<br>(38.9 to 42.0) | 37.4<br>(33.9 to 40.8) | -1.0<br>(-1.9 to -0.1) |
| Tracheal, bronchus, and lung cancer | High-middle SDI | 561<br>(533 to 587)       | 672<br>(604 to 736)       | 2.0<br>(0.8 to 3.2) | 34.3<br>(32.6 to 35.9) | 32.7<br>(29.3 to 35.8) | -0.6<br>(-1.8 to 0.6)  |
| Tracheal, bronchus, and lung cancer | Middle SDI      | 482<br>(448 to 516)       | 662<br>(579 to 750)       | 3.5<br>(1.9 to 5.0) | 26.5<br>(24.6 to 28.4) | 27.0<br>(23.7 to 30.6) | 0.2<br>(-1.3 to 1.6)   |
| Tracheal, bronchus, and lung cancer | Low-middle SDI  | 124<br>(115 to 133)       | 171<br>(154 to 188)       | 3.6<br>(2.4 to 4.7) | 12.1<br>(11.3 to 13.0) | 12.7<br>(11.4 to 13.9) | 0.5<br>(-0.7 to 1.5)   |
| Tracheal, bronchus, and lung cancer | Low SDI         | 32.2<br>(27.4 to 38.2)    | 44.6<br>(38.3 to 52.4)    | 3.6<br>(2.3 to 4.8) | 8.5<br>(7.3 to 10.1)   | 8.8<br>(7.6 to 10.3)   | 0.4<br>(-0.9 to 1.5)   |
| Malignant skin melanoma             | Global          | 241<br>(172 to 274)       | 290<br>(214 to 342)       | 2.0<br>(1.0 to 3.1) | 3.7<br>(2.6 to 4.2)    | 3.6<br>(2.6 to 4.2)    | -0.4<br>(-1.5 to 0.7)  |
| Malignant skin melanoma             | High SDI        | 168<br>(116 to 194)       | 194<br>(140 to 238)       | 1.6<br>(0.4 to 3.0) | 12.4<br>(8.8 to 14.8)  | 12.4<br>(9.2 to 15.5)  | -0.0<br>(-1.3 to 1.5)  |
| Malignant skin melanoma             | High-middle SDI | 54.7<br>(38.6 to 59.9)    | 67.6<br>(47.6 to 78.7)    | 2.4<br>(1.3 to 3.5) | 3.4<br>(2.4 to 3.7)    | 3.5<br>(2.5 to 4.1)    | 0.4<br>(-0.6 to 1.6)   |

|                          |                 |                           |                           |                      |                           |                           |                        |
|--------------------------|-----------------|---------------------------|---------------------------|----------------------|---------------------------|---------------------------|------------------------|
| Malignant skin melanoma  | Middle SDI      | 12.3<br>(9.82 to 14.4)    | 18.1<br>(14.3 to 21.7)    | 4.3<br>(3.0 to 5.5)  | 0.6<br>(0.5 to 0.7)       | 0.7<br>(0.6 to 0.9)       | 1.7<br>(0.5 to 2.8)    |
| Malignant skin melanoma  | Low-middle SDI  | 4.28<br>(3.32 to 5.08)    | 6.17<br>(4.82 to 7.30)    | 4.1<br>(2.9 to 5.1)  | 0.4<br>(0.3 to 0.5)       | 0.4<br>(0.3 to 0.5)       | 1.2<br>(0.2 to 2.2)    |
| Malignant skin melanoma  | Low SDI         | 2.43<br>(1.79 to 3.17)    | 3.42<br>(2.59 to 4.39)    | 3.8<br>(2.1 to 5.5)  | 0.5<br>(0.4 to 0.6)       | 0.5<br>(0.4 to 0.7)       | 0.5<br>(-0.9 to 1.9)   |
| Non-melanoma skin cancer | Global          | 4 850<br>(4 440 to 5 250) | 6 350<br>(5 810 to 6 950) | 3.0<br>(2.8 to 3.2)  | 79.0<br>(72.6 to 85.8)    | 79.1<br>(72.3 to 86.6)    | 0.0<br>(-0.2 to 0.2)   |
| Non-melanoma skin cancer | High SDI        | 4 100<br>(3 770 to 4 430) | 5 340<br>(4 890 to 5 830) | 2.9<br>(2.7 to 3.2)  | 268.6<br>(247.3 to 289.9) | 288.7<br>(264.7 to 313.7) | 0.8<br>(0.6 to 1.0)    |
| Non-melanoma skin cancer | High-middle SDI | 421<br>(375 to 471)       | 530<br>(459 to 607)       | 2.6<br>(2.2 to 2.9)  | 26.4<br>(23.5 to 29.5)    | 26.3<br>(22.9 to 30.0)    | -0.0<br>(-0.4 to 0.3)  |
| Non-melanoma skin cancer | Middle SDI      | 231<br>(201 to 262)       | 343<br>(291 to 397)       | 4.4<br>(4.0 to 4.7)  | 12.8<br>(11.2 to 14.4)    | 14.0<br>(12.0 to 16.1)    | 1.0<br>(0.7 to 1.3)    |
| Non-melanoma skin cancer | Low-middle SDI  | 74.8<br>(64.3 to 86.0)    | 113<br>(93.9 to 133)      | 4.6<br>(4.2 to 4.9)  | 7.7<br>(6.6 to 8.7)       | 8.4<br>(7.0 to 9.8)       | 1.0<br>(0.5 to 1.4)    |
| Non-melanoma skin cancer | Low SDI         | 17.2<br>(14.0 to 21.1)    | 22.6<br>(18.4 to 27.9)    | 3.1<br>(2.9 to 3.3)  | 4.4<br>(3.6 to 5.2)       | 4.2<br>(3.4 to 5.0)       | -0.6<br>(-0.8 to -0.3) |
| Breast cancer            | Global          | 1 580<br>(1 520 to 1 640) | 2 000<br>(1 830 to 2 170) | 2.6<br>(1.7 to 3.5)  | 23.8<br>(22.8 to 24.6)    | 24.2<br>(22.1 to 26.2)    | 0.2<br>(-0.7 to 1.0)   |
| Breast cancer            | High SDI        | 622<br>(593 to 641)       | 679<br>(607 to 754)       | 1.0<br>(-0.2 to 2.1) | 43.9<br>(42.2 to 45.1)    | 41.2<br>(36.9 to 45.6)    | -0.7<br>(-1.9 to 0.4)  |
| Breast cancer            | High-middle SDI | 425<br>(407 to 441)       | 517<br>(464 to 574)       | 2.2<br>(1.1 to 3.3)  | 25.7<br>(24.6 to 26.7)    | 26.0<br>(23.3 to 28.9)    | 0.1<br>(-1.0 to 1.3)   |
| Breast cancer            | Middle SDI      | 337<br>(319 to 357)       | 493<br>(437 to 553)       | 4.2<br>(2.9 to 5.5)  | 16.0<br>(15.1 to 16.8)    | 18.5<br>(16.4 to 20.8)    | 1.7<br>(0.4 to 2.9)    |
| Breast cancer            | Low-middle SDI  | 147<br>(136 to 158)       | 231<br>(203 to 259)       | 5.0<br>(3.7 to 6.3)  | 12.6<br>(11.7 to 13.5)    | 15.4<br>(13.5 to 17.3)    | 2.2<br>(0.9 to 3.5)    |
| Breast cancer            | Low SDI         | 51.5<br>(45.8 to 57.7)    | 81.7<br>(71.3 to 93.3)    | 5.1<br>(3.6 to 6.5)  | 11.5<br>(10.1 to 12.8)    | 13.5<br>(11.9 to 15.2)    | 1.8<br>(0.5 to 3.1)    |
| Cervical cancer          | Global          | 477<br>(423 to 521)       | 566<br>(482 to 636)       | 1.9<br>(0.9 to 2.9)  | 6.9<br>(6.1 to 7.5)       | 6.8<br>(5.8 to 7.7)       | -0.1<br>(-1.1 to 0.8)  |
| Cervical cancer          | High SDI        | 60.8<br>(56.4 to 63.2)    | 63.9<br>(55.7 to 71.5)    | 0.5<br>(-0.6 to 1.7) | 4.8<br>(4.4 to 5.0)       | 4.5<br>(3.9 to 5.0)       | -0.7<br>(-1.9 to 0.5)  |

|                 |                 |                         |                           |                      |                        |                        |                       |
|-----------------|-----------------|-------------------------|---------------------------|----------------------|------------------------|------------------------|-----------------------|
| Cervical cancer | High-middle SDI | 103<br>(89.2 to 110)    | 113<br>(89.8 to 129)      | 1.0<br>(-0.4 to 2.4) | 6.3<br>(5.4 to 6.6)    | 5.9<br>(4.7 to 6.8)    | -0.6<br>(-2.1 to 0.8) |
| Cervical cancer | Middle SDI      | 154<br>(128 to 166)     | 183<br>(144 to 209)       | 1.9<br>(0.6 to 3.2)  | 7.1<br>(5.9 to 7.7)    | 6.9<br>(5.4 to 7.8)    | -0.4<br>(-1.7 to 0.8) |
| Cervical cancer | Low-middle SDI  | 97.4<br>(86.7 to 116)   | 126<br>(108 to 150)       | 2.9<br>(1.6 to 4.2)  | 7.8<br>(7.0 to 9.5)    | 8.0<br>(6.9 to 9.6)    | 0.3<br>(-0.9 to 1.6)  |
| Cervical cancer | Low SDI         | 60.3<br>(47.6 to 72.0)  | 78.8<br>(61.6 to 97.9)    | 3.0<br>(1.7 to 4.4)  | 12.0<br>(9.5 to 14.4)  | 11.7<br>(9.3 to 14.5)  | -0.2<br>(-1.4 to 1.1) |
| Uterine cancer  | Global          | 359<br>(317 to 375)     | 435<br>(397 to 480)       | 2.1<br>(1.1 to 3.4)  | 5.4<br>(4.8 to 5.7)    | 5.2<br>(4.8 to 5.7)    | -0.5<br>(-1.4 to 0.7) |
| Uterine cancer  | High SDI        | 134<br>(128 to 138)     | 168<br>(149 to 189)       | 2.5<br>(1.2 to 3.7)  | 9.3<br>(8.9 to 9.6)    | 9.9<br>(8.8 to 11.1)   | 0.7<br>(-0.6 to 1.9)  |
| Uterine cancer  | High-middle SDI | 129<br>(115 to 136)     | 149<br>(133 to 165)       | 1.6<br>(0.4 to 3.0)  | 7.8<br>(6.9 to 8.2)    | 7.3<br>(6.5 to 8.1)    | -0.7<br>(-1.8 to 0.7) |
| Uterine cancer  | Middle SDI      | 69.1<br>(46.5 to 77.6)  | 78.6<br>(64.7 to 92.0)    | 1.4<br>(-0.5 to 4.8) | 3.3<br>(2.3 to 3.7)    | 2.9<br>(2.4 to 3.4)    | -1.4<br>(-3.2 to 1.8) |
| Uterine cancer  | Low-middle SDI  | 19.7<br>(16.7 to 22.9)  | 29.4<br>(25.0 to 35.6)    | 4.4<br>(3.3 to 5.6)  | 1.8<br>(1.5 to 2.1)    | 2.0<br>(1.7 to 2.5)    | 1.5<br>(0.4 to 2.6)   |
| Uterine cancer  | Low SDI         | 6.23<br>(5.13 to 7.65)  | 9.53<br>(7.77 to 11.7)    | 4.7<br>(3.4 to 6.2)  | 1.5<br>(1.3 to 1.9)    | 1.7<br>(1.4 to 2.1)    | 1.4<br>(0.2 to 2.7)   |
| Ovarian cancer  | Global          | 230<br>(214 to 248)     | 294<br>(261 to 330)       | 2.7<br>(1.7 to 3.7)  | 3.5<br>(3.2 to 3.7)    | 3.6<br>(3.2 to 4.0)    | 0.3<br>(-0.8 to 1.3)  |
| Ovarian cancer  | High SDI        | 74.2<br>(69.3 to 77.4)  | 80.5<br>(70.5 to 91.5)    | 0.9<br>(-0.2 to 2.1) | 5.2<br>(4.9 to 5.4)    | 4.8<br>(4.3 to 5.5)    | -0.9<br>(-2.0 to 0.3) |
| Ovarian cancer  | High-middle SDI | 66.4<br>(61.9 to 70.0)  | 77.3<br>(65.9 to 86.5)    | 1.7<br>(0.5 to 2.8)  | 4.1<br>(3.8 to 4.3)    | 4.0<br>(3.4 to 4.4)    | -0.3<br>(-1.5 to 0.8) |
| Ovarian cancer  | Middle SDI      | 52.6<br>(47.0 to 60.5)  | 76.5<br>(63.2 to 89.0)    | 4.2<br>(2.5 to 5.5)  | 2.5<br>(2.3 to 2.9)    | 2.9<br>(2.4 to 3.4)    | 1.7<br>(0.0 to 3.0)   |
| Ovarian cancer  | Low-middle SDI  | 27.0<br>(23.3 to 33.0)  | 43.6<br>(35.3 to 54.7)    | 5.3<br>(3.2 to 7.0)  | 2.3<br>(2.0 to 2.8)    | 2.9<br>(2.4 to 3.6)    | 2.6<br>(0.5 to 4.2)   |
| Ovarian cancer  | Low SDI         | 9.65<br>(7.75 to 14.3)  | 16.4<br>(13.5 to 20.3)    | 5.9<br>(3.1 to 8.3)  | 2.1<br>(1.6 to 3.0)    | 2.6<br>(2.2 to 3.2)    | 2.6<br>(0.0 to 4.9)   |
| Prostate cancer | Global          | 1 070<br>(927 to 1 360) | 1 410<br>(1 230 to 1 830) | 3.1<br>(2.3 to 4.0)  | 17.3<br>(14.9 to 22.0) | 17.4<br>(15.1 to 22.5) | 0.1<br>(-0.8 to 1.0)  |

|                   |                 |                        |                        |                      |                        |                        |                       |
|-------------------|-----------------|------------------------|------------------------|----------------------|------------------------|------------------------|-----------------------|
| Prostate cancer   | High SDI        | 568<br>(477 to 766)    | 696<br>(588 to 994)    | 2.3<br>(1.0 to 3.5)  | 36.7<br>(31.0 to 49.5) | 36.6<br>(30.8 to 52.4) | -0.0<br>(-1.3 to 1.3) |
| Prostate cancer   | High-middle SDI | 240<br>(209 to 304)    | 318<br>(275 to 404)    | 3.2<br>(2.2 to 4.1)  | 14.9<br>(13.0 to 18.8) | 15.4<br>(13.3 to 19.5) | 0.4<br>(-0.6 to 1.3)  |
| Prostate cancer   | Middle SDI      | 160<br>(138 to 184)    | 249<br>(215 to 298)    | 4.9<br>(3.9 to 5.9)  | 9.7<br>(8.3 to 11.2)   | 10.8<br>(9.3 to 12.8)  | 1.2<br>(0.2 to 2.1)   |
| Prostate cancer   | Low-middle SDI  | 68.9<br>(58.2 to 78.6) | 105<br>(89.7 to 122)   | 4.6<br>(3.6 to 5.6)  | 7.9<br>(6.7 to 9.0)    | 8.5<br>(7.3 to 10.0)   | 0.9<br>(-0.1 to 1.9)  |
| Prostate cancer   | Low SDI         | 28.3<br>(20.8 to 33.3) | 40.6<br>(30.4 to 47.9) | 4.0<br>(3.1 to 4.9)  | 9.2<br>(6.7 to 10.8)   | 9.6<br>(7.2 to 11.3)   | 0.5<br>(-0.4 to 1.3)  |
| Testicular cancer | Global          | 88.4<br>(75.0 to 101)  | 109<br>(93.4 to 129)   | 2.4<br>(1.2 to 3.6)  | 1.2<br>(1.0 to 1.4)    | 1.4<br>(1.2 to 1.7)    | 1.3<br>(0.1 to 2.5)   |
| Testicular cancer | High SDI        | 36.2<br>(29.1 to 43.4) | 36.6<br>(28.5 to 45.9) | 0.1<br>(-1.5 to 1.8) | 4.1<br>(3.0 to 5.3)    | 4.0<br>(2.8 to 5.4)    | -0.2<br>(-2.0 to 1.4) |
| Testicular cancer | High-middle SDI | 29.3<br>(24.4 to 34.7) | 37.8<br>(30.9 to 46.3) | 2.8<br>(1.2 to 4.5)  | 2.2<br>(1.7 to 2.7)    | 2.7<br>(2.1 to 3.5)    | 2.4<br>(0.5 to 4.3)   |
| Testicular cancer | Middle SDI      | 15.3<br>(13.1 to 17.5) | 23.6<br>(20.6 to 27.5) | 4.9<br>(3.3 to 6.5)  | 0.7<br>(0.6 to 0.8)    | 1.0<br>(0.9 to 1.2)    | 3.9<br>(2.4 to 5.6)   |
| Testicular cancer | Low-middle SDI  | 5.28<br>(4.32 to 6.93) | 7.82<br>(6.57 to 9.83) | 4.4<br>(2.4 to 6.4)  | 0.3<br>(0.3 to 0.4)    | 0.4<br>(0.4 to 0.6)    | 3.1<br>(1.3 to 5.0)   |
| Testicular cancer | Low SDI         | 2.33<br>(1.60 to 4.45) | 3.41<br>(2.47 to 5.76) | 4.2<br>(0.9 to 7.5)  | 0.2<br>(0.2 to 0.4)    | 0.3<br>(0.2 to 0.4)    | 2.0<br>(-0.6 to 4.8)  |
| Kidney cancer     | Global          | 295<br>(285 to 303)    | 372<br>(345 to 402)    | 2.6<br>(1.8 to 3.4)  | 4.6<br>(4.4 to 4.7)    | 4.6<br>(4.2 to 4.9)    | 0.0<br>(-0.8 to 0.8)  |
| Kidney cancer     | High SDI        | 132<br>(126 to 135)    | 155<br>(141 to 171)    | 1.8<br>(0.8 to 2.9)  | 9.1<br>(8.8 to 9.3)    | 9.0<br>(8.2 to 10.0)   | -0.1<br>(-1.1 to 1.0) |
| Kidney cancer     | High-middle SDI | 96.8<br>(93.4 to 99.8) | 119<br>(110 to 128)    | 2.3<br>(1.4 to 3.1)  | 6.1<br>(5.8 to 6.3)    | 6.1<br>(5.6 to 6.6)    | 0.1<br>(-0.8 to 0.9)  |
| Kidney cancer     | Middle SDI      | 45.6<br>(43.0 to 49.1) | 66.5<br>(59.2 to 75.2) | 4.2<br>(3.0 to 5.3)  | 2.3<br>(2.2 to 2.5)    | 2.6<br>(2.4 to 3.0)    | 1.5<br>(0.4 to 2.6)   |
| Kidney cancer     | Low-middle SDI  | 14.9<br>(13.9 to 16.1) | 22.6<br>(20.5 to 25.1) | 4.6<br>(3.5 to 5.8)  | 1.3<br>(1.2 to 1.4)    | 1.5<br>(1.4 to 1.7)    | 2.1<br>(1.0 to 3.3)   |
| Kidney cancer     | Low SDI         | 5.73<br>(4.84 to 6.67) | 8.37<br>(7.27 to 9.54) | 4.2<br>(2.8 to 5.7)  | 1.1<br>(0.9 to 1.2)    | 1.2<br>(1.0 to 1.4)    | 1.7<br>(0.5 to 3.0)   |

|                                         |                 |                        |                        |                      |                      |                      |                       |
|-----------------------------------------|-----------------|------------------------|------------------------|----------------------|----------------------|----------------------|-----------------------|
| Bladder cancer                          | Global          | 405<br>(386 to 419)    | 524<br>(476 to 569)    | 2.9<br>(2.0 to 3.7)  | 6.6<br>(6.2 to 6.8)  | 6.5<br>(5.9 to 7.1)  | -0.1<br>(-0.9 to 0.8) |
| Bladder cancer                          | High SDI        | 156<br>(147 to 162)    | 192<br>(170 to 214)    | 2.3<br>(1.2 to 3.3)  | 9.9<br>(9.4 to 10.2) | 9.9<br>(8.9 to 11.0) | -0.0<br>(-1.1 to 1.1) |
| Bladder cancer                          | High-middle SDI | 145<br>(139 to 150)    | 178<br>(162 to 195)    | 2.3<br>(1.2 to 3.3)  | 9.0<br>(8.6 to 9.4)  | 8.8<br>(8.0 to 9.6)  | -0.4<br>(-1.4 to 0.6) |
| Bladder cancer                          | Middle SDI      | 69.0<br>(64.5 to 73.2) | 104<br>(91.9 to 119)   | 4.6<br>(3.2 to 5.9)  | 3.8<br>(3.6 to 4.1)  | 4.3<br>(3.8 to 4.9)  | 1.2<br>(-0.0 to 2.5)  |
| Bladder cancer                          | Low-middle SDI  | 23.7<br>(21.8 to 25.8) | 34.9<br>(32.0 to 38.0) | 4.3<br>(3.2 to 5.5)  | 2.4<br>(2.2 to 2.7)  | 2.7<br>(2.5 to 2.9)  | 1.0<br>(-0.1 to 2.2)  |
| Bladder cancer                          | Low SDI         | 11.1<br>(9.32 to 12.7) | 15.5<br>(13.5 to 17.7) | 3.7<br>(2.1 to 5.1)  | 3.2<br>(2.7 to 3.6)  | 3.3<br>(2.8 to 3.7)  | 0.2<br>(-1.3 to 1.7)  |
| Brain and central nervous system cancer | Global          | 284<br>(226 to 307)    | 348<br>(262 to 389)    | 2.2<br>(1.0 to 3.2)  | 4.3<br>(3.4 to 4.6)  | 4.3<br>(3.3 to 4.9)  | 0.2<br>(-1.0 to 1.1)  |
| Brain and central nervous system cancer | High SDI        | 77.5<br>(56.6 to 82.9) | 91.7<br>(64.0 to 106)  | 1.9<br>(0.8 to 3.0)  | 6.3<br>(4.7 to 6.7)  | 6.5<br>(4.6 to 7.4)  | 0.3<br>(-0.9 to 1.4)  |
| Brain and central nervous system cancer | High-middle SDI | 81.5<br>(63.2 to 87.7) | 97.8<br>(70.8 to 111)  | 2.0<br>(0.7 to 3.0)  | 5.4<br>(4.2 to 5.8)  | 5.6<br>(4.1 to 6.4)  | 0.4<br>(-1.0 to 1.4)  |
| Brain and central nervous system cancer | Middle SDI      | 77.3<br>(60.6 to 84.0) | 98.9<br>(73.3 to 113)  | 2.7<br>(1.2 to 3.9)  | 3.8<br>(2.9 to 4.1)  | 4.0<br>(3.0 to 4.6)  | 0.7<br>(-0.8 to 1.8)  |
| Brain and central nervous system cancer | Low-middle SDI  | 33.8<br>(27.3 to 40.9) | 41.6<br>(32.9 to 48.8) | 2.3<br>(0.6 to 3.6)  | 2.5<br>(2.0 to 3.1)  | 2.6<br>(2.1 to 3.1)  | 0.5<br>(-1.0 to 1.6)  |
| Brain and central nervous system cancer | Low SDI         | 14.0<br>(10.2 to 19.5) | 17.8<br>(13.1 to 22.0) | 2.6<br>(0.4 to 4.6)  | 1.9<br>(1.4 to 2.5)  | 2.0<br>(1.5 to 2.4)  | 0.4<br>(-1.4 to 1.9)  |
| Thyroid cancer                          | Global          | 191<br>(171 to 198)    | 234<br>(212 to 253)    | 2.2<br>(1.5 to 3.1)  | 2.8<br>(2.5 to 2.9)  | 2.8<br>(2.6 to 3.1)  | 0.1<br>(-0.6 to 1.0)  |
| Thyroid cancer                          | High SDI        | 67.2<br>(59.0 to 69.8) | 68.4<br>(62.1 to 74.9) | 0.2<br>(-0.8 to 1.5) | 5.2<br>(4.5 to 5.4)  | 4.6<br>(4.2 to 5.0)  | -1.3<br>(-2.4 to 0.1) |
| Thyroid cancer                          | High-middle SDI | 49.8<br>(46.7 to 51.9) | 58.0<br>(52.4 to 64.0) | 1.7<br>(0.7 to 2.7)  | 3.0<br>(2.9 to 3.2)  | 3.1<br>(2.8 to 3.4)  | 0.0<br>(-1.0 to 1.1)  |
| Thyroid cancer                          | Middle SDI      | 46.0<br>(41.6 to 48.9) | 65.6<br>(57.6 to 73.1) | 3.9<br>(2.9 to 4.9)  | 2.1<br>(1.9 to 2.3)  | 2.5<br>(2.2 to 2.8)  | 1.7<br>(0.7 to 2.7)   |
| Thyroid cancer                          | Low-middle SDI  | 20.4<br>(17.7 to 22.3) | 30.1<br>(26.0 to 33.7) | 4.3<br>(3.3 to 5.4)  | 1.6<br>(1.4 to 1.8)  | 1.9<br>(1.7 to 2.1)  | 1.9<br>(0.8 to 2.9)   |

|                      |                 |                          |                         |                      |                       |                      |                        |
|----------------------|-----------------|--------------------------|-------------------------|----------------------|-----------------------|----------------------|------------------------|
| Thyroid cancer       | Low SDI         | 7.79<br>(6.25 to 8.91)   | 11.7<br>(9.59 to 13.7)  | 4.5<br>(3.0 to 6.1)  | 1.4<br>(1.2 to 1.7)   | 1.6<br>(1.3 to 1.9)  | 1.3<br>(0.1 to 2.6)    |
| Mesothelioma         | Global          | 29.3<br>(26.9 to 30.9)   | 34.5<br>(31.2 to 37.8)  | 1.8<br>(1.1 to 2.6)  | 0.5<br>(0.4 to 0.5)   | 0.4<br>(0.4 to 0.5)  | -0.9<br>(-1.7 to -0.1) |
| Mesothelioma         | High SDI        | 15.1<br>(14.1 to 15.7)   | 17.5<br>(15.6 to 19.6)  | 1.7<br>(0.6 to 2.8)  | 1.0<br>(0.9 to 1.0)   | 0.9<br>(0.8 to 1.0)  | -0.7<br>(-1.8 to 0.5)  |
| Mesothelioma         | High-middle SDI | 6.64<br>(5.93 to 7.06)   | 7.24<br>(6.39 to 8.01)  | 1.0<br>(-0.1 to 2.0) | 0.4<br>(0.4 to 0.4)   | 0.4<br>(0.3 to 0.4)  | -1.4<br>(-2.5 to -0.3) |
| Mesothelioma         | Middle SDI      | 4.13<br>(3.71 to 4.49)   | 4.97<br>(4.45 to 5.47)  | 2.1<br>(1.1 to 3.0)  | 0.2<br>(0.2 to 0.2)   | 0.2<br>(0.2 to 0.2)  | -0.8<br>(-1.7 to 0.1)  |
| Mesothelioma         | Low-middle SDI  | 2.51<br>(2.00 to 3.19)   | 3.52<br>(2.87 to 4.37)  | 3.8<br>(2.5 to 5.1)  | 0.2<br>(0.2 to 0.3)   | 0.3<br>(0.2 to 0.3)  | 0.8<br>(-0.4 to 2.1)   |
| Mesothelioma         | Low SDI         | 0.862<br>(0.490 to 1.61) | 1.20<br>(0.703 to 2.23) | 3.7<br>(2.1 to 5.3)  | 0.2<br>(0.1 to 0.4)   | 0.2<br>(0.1 to 0.4)  | 0.6<br>(-0.9 to 2.0)   |
| Hodgkin lymphoma     | Global          | 77.3<br>(69.1 to 89.1)   | 87.5<br>(77.9 to 101)   | 1.4<br>(0.7 to 2.0)  | 1.1<br>(1.0 to 1.3)   | 1.1<br>(1.0 to 1.3)  | -0.3<br>(-1.0 to 0.3)  |
| Hodgkin lymphoma     | High SDI        | 30.5<br>(27.0 to 36.2)   | 33.0<br>(28.6 to 39.9)  | 0.9<br>(-0.0 to 1.8) | 2.6<br>(2.3 to 3.2)   | 2.5<br>(2.2 to 3.2)  | -0.5<br>(-1.4 to 0.5)  |
| Hodgkin lymphoma     | High-middle SDI | 20.0<br>(17.4 to 22.7)   | 22.0<br>(19.1 to 25.4)  | 1.0<br>(0.1 to 1.9)  | 1.3<br>(1.1 to 1.5)   | 1.4<br>(1.2 to 1.6)  | 0.3<br>(-0.6 to 1.2)   |
| Hodgkin lymphoma     | Middle SDI      | 12.7<br>(10.8 to 14.9)   | 15.8<br>(13.3 to 18.5)  | 2.4<br>(1.6 to 3.2)  | 0.6<br>(0.5 to 0.7)   | 0.6<br>(0.5 to 0.7)  | 0.9<br>(0.1 to 1.7)    |
| Hodgkin lymphoma     | Low-middle SDI  | 8.58<br>(7.49 to 11.1)   | 10.0<br>(8.61 to 12.8)  | 1.7<br>(0.7 to 2.8)  | 0.6<br>(0.5 to 0.8)   | 0.6<br>(0.5 to 0.8)  | -0.2<br>(-1.2 to 0.7)  |
| Hodgkin lymphoma     | Low SDI         | 5.36<br>(4.02 to 6.24)   | 6.63<br>(5.06 to 7.84)  | 2.4<br>(1.2 to 3.5)  | 0.8<br>(0.6 to 0.9)   | 0.7<br>(0.6 to 0.9)  | -0.7<br>(-1.8 to 0.4)  |
| Non-Hodgkin lymphoma | Global          | 355<br>(331 to 377)      | 457<br>(417 to 499)     | 2.8<br>(2.1 to 3.5)  | 5.6<br>(5.2 to 6.0)   | 5.7<br>(5.2 to 6.3)  | 0.2<br>(-0.5 to 0.9)   |
| Non-Hodgkin lymphoma | High SDI        | 152<br>(138 to 165)      | 184<br>(162 to 207)     | 2.1<br>(1.2 to 3.0)  | 10.1<br>(9.2 to 10.8) | 9.9<br>(8.8 to 11.1) | -0.2<br>(-1.0 to 0.7)  |
| Non-Hodgkin lymphoma | High-middle SDI | 88.3<br>(82.8 to 94.2)   | 110<br>(98.4 to 123)    | 2.4<br>(1.5 to 3.4)  | 5.7<br>(5.3 to 6.1)   | 5.9<br>(5.3 to 6.5)  | 0.3<br>(-0.6 to 1.3)   |
| Non-Hodgkin lymphoma | Middle SDI      | 70.9<br>(65.8 to 76.6)   | 102<br>(91.2 to 114)    | 4.0<br>(2.9 to 5.1)  | 3.6<br>(3.3 to 3.9)   | 4.1<br>(3.7 to 4.6)  | 1.6<br>(0.6 to 2.6)    |



|                         |                 |                        |                        |                      |                        |                        |                       |
|-------------------------|-----------------|------------------------|------------------------|----------------------|------------------------|------------------------|-----------------------|
| Non-Hodgkin lymphoma    | Low-middle SDI  | 31.8<br>(28.4 to 36.4) | 45.4<br>(40.3 to 51.6) | 3.9<br>(3.0 to 4.9)  | 2.6<br>(2.4 to 2.9)    | 3.0<br>(2.7 to 3.4)    | 1.6<br>(0.6 to 2.5)   |
| Non-Hodgkin lymphoma    | Low SDI         | 11.2<br>(9.52 to 13.3) | 15.6<br>(12.9 to 18.8) | 3.7<br>(2.4 to 4.9)  | 2.2<br>(1.9 to 2.6)    | 2.4<br>(2.0 to 2.8)    | 0.6<br>(-0.4 to 1.6)  |
| Multiple myeloma        | Global          | 121<br>(108 to 129)    | 156<br>(137 to 173)    | 2.8<br>(2.0 to 3.6)  | 1.9<br>(1.7 to 2.1)    | 1.9<br>(1.7 to 2.1)    | -0.1<br>(-0.9 to 0.7) |
| Multiple myeloma        | High SDI        | 59.3<br>(52.7 to 63.0) | 72.2<br>(62.6 to 82.5) | 2.2<br>(1.2 to 3.2)  | 3.8<br>(3.4 to 4.1)    | 3.8<br>(3.3 to 4.3)    | -0.1<br>(-1.0 to 1.0) |
| Multiple myeloma        | High-middle SDI | 29.5<br>(25.6 to 31.1) | 37.4<br>(31.0 to 41.8) | 2.6<br>(1.5 to 3.6)  | 1.8<br>(1.6 to 1.9)    | 1.8<br>(1.5 to 2.1)    | 0.0<br>(-1.1 to 1.0)  |
| Multiple myeloma        | Middle SDI      | 18.5<br>(16.1 to 20.8) | 26.7<br>(22.0 to 30.4) | 4.1<br>(2.6 to 5.2)  | 1.0<br>(0.9 to 1.1)    | 1.1<br>(0.9 to 1.2)    | 0.8<br>(-0.7 to 1.9)  |
| Multiple myeloma        | Low-middle SDI  | 9.58<br>(8.38 to 11.2) | 13.8<br>(11.9 to 15.9) | 4.0<br>(2.8 to 5.0)  | 0.9<br>(0.8 to 1.1)    | 1.0<br>(0.9 to 1.2)    | 0.9<br>(-0.3 to 1.9)  |
| Multiple myeloma        | Low SDI         | 3.90<br>(3.10 to 4.74) | 5.48<br>(4.32 to 6.39) | 3.8<br>(2.5 to 4.9)  | 1.0<br>(0.8 to 1.2)    | 1.1<br>(0.8 to 1.2)    | 0.5<br>(-0.7 to 1.6)  |
| Leukemia                | Global          | 562<br>(522 to 601)    | 644<br>(587 to 700)    | 1.5<br>(0.6 to 2.4)  | 8.6<br>(8.0 to 9.2)    | 8.2<br>(7.5 to 8.9)    | -0.5<br>(-1.4 to 0.4) |
| Leukemia                | High SDI        | 165<br>(155 to 174)    | 189<br>(169 to 208)    | 1.5<br>(0.5 to 2.4)  | 12.4<br>(11.8 to 13.1) | 12.0<br>(10.9 to 13.2) | -0.4<br>(-1.4 to 0.6) |
| Leukemia                | High-middle SDI | 141<br>(131 to 147)    | 168<br>(151 to 183)    | 2.0<br>(0.9 to 2.9)  | 10.0<br>(9.3 to 10.5)  | 10.1<br>(9.1 to 11.1)  | 0.1<br>(-0.9 to 1.1)  |
| Leukemia                | Middle SDI      | 143<br>(131 to 156)    | 164<br>(144 to 184)    | 1.5<br>(0.3 to 2.6)  | 7.1<br>(6.5 to 7.7)    | 6.9<br>(6.1 to 7.7)    | -0.3<br>(-1.5 to 0.8) |
| Leukemia                | Low-middle SDI  | 68.7<br>(57.3 to 82.2) | 74.2<br>(65.0 to 86.0) | 0.9<br>(-0.6 to 2.3) | 5.0<br>(4.3 to 5.8)    | 4.7<br>(4.2 to 5.5)    | -0.6<br>(-1.9 to 0.7) |
| Leukemia                | Low SDI         | 44.8<br>(32.7 to 61.0) | 49.0<br>(37.9 to 60.8) | 1.0<br>(-1.3 to 3.4) | 5.4<br>(4.2 to 6.7)    | 5.1<br>(4.1 to 6.0)    | -0.6<br>(-2.2 to 0.9) |
| Acute lymphoid leukemia | Global          | 114<br>(101 to 125)    | 153<br>(129 to 171)    | 3.3<br>(2.1 to 4.4)  | 1.7<br>(1.5 to 1.8)    | 2.0<br>(1.6 to 2.2)    | 1.8<br>(0.5 to 2.9)   |
| Acute lymphoid leukemia | High SDI        | 34.9<br>(32.5 to 39.9) | 40.1<br>(34.9 to 45.8) | 1.6<br>(0.2 to 2.8)  | 3.4<br>(3.2 to 3.8)    | 3.5<br>(3.1 to 4.0)    | 0.5<br>(-0.8 to 1.8)  |
| Acute lymphoid leukemia | High-middle SDI | 33.7<br>(29.9 to 37.2) | 52.1<br>(43.2 to 59.7) | 4.8<br>(3.4 to 6.1)  | 2.5<br>(2.2 to 2.7)    | 3.4<br>(2.8 to 3.9)    | 3.5<br>(2.0 to 4.8)   |

|                           |                 |                        |                        |                      |                     |                     |                        |
|---------------------------|-----------------|------------------------|------------------------|----------------------|---------------------|---------------------|------------------------|
| Acute lymphoid leukemia   | Middle SDI      | 25.9<br>(20.5 to 28.4) | 40.6<br>(29.1 to 46.9) | 5.0<br>(3.3 to 6.4)  | 1.2<br>(1.0 to 1.4) | 1.7<br>(1.2 to 2.0) | 3.6<br>(2.0 to 5.0)    |
| Acute lymphoid leukemia   | Low-middle SDI  | 11.3<br>(9.29 to 14.4) | 11.8<br>(9.96 to 14.1) | 0.4<br>(-1.1 to 2.1) | 0.7<br>(0.6 to 0.9) | 0.7<br>(0.6 to 0.8) | -0.3<br>(-1.7 to 1.2)  |
| Acute lymphoid leukemia   | Low SDI         | 7.80<br>(5.38 to 11.7) | 8.65<br>(6.37 to 11.0) | 1.1<br>(-1.7 to 4.0) | 0.7<br>(0.5 to 0.9) | 0.6<br>(0.5 to 0.8) | -0.6<br>(-3.0 to 1.7)  |
| Chronic lymphoid leukemia | Global          | 80.3<br>(74.9 to 90.7) | 103<br>(93.5 to 119)   | 2.8<br>(2.0 to 3.6)  | 1.3<br>(1.2 to 1.5) | 1.3<br>(1.2 to 1.5) | -0.1<br>(-0.9 to 0.7)  |
| Chronic lymphoid leukemia | High SDI        | 39.0<br>(35.9 to 46.1) | 44.4<br>(38.4 to 54.6) | 1.4<br>(0.2 to 2.6)  | 2.5<br>(2.3 to 2.9) | 2.3<br>(2.0 to 2.8) | -0.9<br>(-2.1 to 0.3)  |
| Chronic lymphoid leukemia | High-middle SDI | 24.1<br>(22.6 to 26.5) | 30.7<br>(27.6 to 34.4) | 2.7<br>(1.8 to 3.5)  | 1.5<br>(1.4 to 1.7) | 1.5<br>(1.4 to 1.7) | 0.2<br>(-0.7 to 1.0)   |
| Chronic lymphoid leukemia | Middle SDI      | 10.0<br>(9.01 to 11.3) | 16.7<br>(14.6 to 19.3) | 5.7<br>(4.4 to 7.0)  | 0.5<br>(0.5 to 0.6) | 0.7<br>(0.6 to 0.8) | 2.7<br>(1.4 to 3.9)    |
| Chronic lymphoid leukemia | Low-middle SDI  | 4.90<br>(4.40 to 5.59) | 8.30<br>(7.22 to 9.55) | 5.9<br>(4.4 to 7.2)  | 0.5<br>(0.4 to 0.6) | 0.6<br>(0.5 to 0.7) | 2.7<br>(1.2 to 4.0)    |
| Chronic lymphoid leukemia | Low SDI         | 2.17<br>(1.79 to 2.54) | 3.35<br>(2.82 to 3.95) | 4.8<br>(3.7 to 6.0)  | 0.6<br>(0.5 to 0.7) | 0.7<br>(0.6 to 0.8) | 1.6<br>(0.5 to 2.7)    |
| Acute myeloid leukemia    | Global          | 104<br>(91.9 to 111)   | 124<br>(109 to 136)    | 1.9<br>(1.1 to 2.8)  | 1.6<br>(1.4 to 1.7) | 1.6<br>(1.4 to 1.7) | -0.2<br>(-1.1 to 0.6)  |
| Acute myeloid leukemia    | High SDI        | 40.6<br>(33.2 to 42.9) | 47.8<br>(38.5 to 53.5) | 1.8<br>(0.9 to 2.8)  | 2.9<br>(2.4 to 3.0) | 2.8<br>(2.3 to 3.1) | -0.4<br>(-1.4 to 0.6)  |
| Acute myeloid leukemia    | High-middle SDI | 22.9<br>(19.3 to 24.0) | 26.1<br>(21.8 to 28.9) | 1.5<br>(0.5 to 2.4)  | 1.6<br>(1.3 to 1.6) | 1.5<br>(1.2 to 1.7) | -0.4<br>(-1.4 to 0.5)  |
| Acute myeloid leukemia    | Middle SDI      | 21.2<br>(19.2 to 24.5) | 25.4<br>(22.6 to 29.9) | 2.0<br>(0.9 to 3.0)  | 1.0<br>(0.9 to 1.2) | 1.1<br>(0.9 to 1.2) | 0.2<br>(-0.8 to 1.2)   |
| Acute myeloid leukemia    | Low-middle SDI  | 13.0<br>(11.4 to 15.8) | 16.2<br>(14.3 to 19.7) | 2.4<br>(1.1 to 3.7)  | 1.0<br>(0.9 to 1.2) | 1.0<br>(0.9 to 1.2) | 0.7<br>(-0.5 to 1.8)   |
| Acute myeloid leukemia    | Low SDI         | 6.76<br>(4.91 to 8.66) | 8.77<br>(6.82 to 10.7) | 2.9<br>(0.9 to 4.9)  | 0.9<br>(0.7 to 1.1) | 0.9<br>(0.7 to 1.1) | 0.7<br>(-0.8 to 2.1)   |
| Chronic myeloid leukemia  | Global          | 58.5<br>(53.4 to 64.5) | 65.8<br>(59.4 to 74.1) | 1.3<br>(0.3 to 2.3)  | 0.9<br>(0.8 to 1.0) | 0.8<br>(0.7 to 0.9) | -1.1<br>(-2.1 to -0.1) |
| Chronic myeloid leukemia  | High SDI        | 26.3<br>(23.9 to 30.6) | 29.6<br>(25.7 to 35.3) | 1.3<br>(0.0 to 2.6)  | 1.8<br>(1.7 to 2.1) | 1.7<br>(1.5 to 2.0) | -0.7<br>(-2.0 to 0.6)  |

|                           |                 |                        |                        |                       |                        |                        |                        |
|---------------------------|-----------------|------------------------|------------------------|-----------------------|------------------------|------------------------|------------------------|
| Chronic myeloid leukemia  | High-middle SDI | 11.7<br>(10.9 to 12.8) | 13.7<br>(12.1 to 15.4) | 1.7<br>(0.6 to 2.8)   | 0.8<br>(0.7 to 0.8)    | 0.7<br>(0.6 to 0.8)    | -0.5<br>(-1.5 to 0.6)  |
| Chronic myeloid leukemia  | Middle SDI      | 6.57<br>(5.98 to 7.24) | 7.64<br>(6.76 to 8.76) | 1.7<br>(0.5 to 2.8)   | 0.3<br>(0.3 to 0.4)    | 0.3<br>(0.3 to 0.4)    | -0.6<br>(-1.8 to 0.5)  |
| Chronic myeloid leukemia  | Low-middle SDI  | 7.67<br>(6.23 to 9.36) | 8.54<br>(7.06 to 10.3) | 1.2<br>(-0.4 to 2.7)  | 0.6<br>(0.5 to 0.7)    | 0.6<br>(0.5 to 0.7)    | -0.9<br>(-2.3 to 0.5)  |
| Chronic myeloid leukemia  | Low SDI         | 6.16<br>(4.24 to 9.62) | 6.29<br>(4.61 to 8.15) | 0.2<br>(-3.0 to 3.1)  | 0.9<br>(0.7 to 1.2)    | 0.8<br>(0.6 to 1.0)    | -1.5<br>(-3.6 to 0.3)  |
| Other leukemia            | Global          | 205<br>(174 to 236)    | 197<br>(171 to 224)    | -0.5<br>(-1.8 to 1.0) | 3.1<br>(2.6 to 3.6)    | 2.6<br>(2.2 to 2.9)    | -2.1<br>(-3.4 to -0.6) |
| Other leukemia            | High SDI        | 24.0<br>(22.0 to 26.8) | 26.7<br>(23.3 to 30.3) | 1.2<br>(0.2 to 2.1)   | 1.9<br>(1.8 to 2.1)    | 1.7<br>(1.5 to 1.9)    | -1.0<br>(-2.0 to -0.0) |
| Other leukemia            | High-middle SDI | 48.3<br>(41.7 to 52.6) | 45.2<br>(37.9 to 52.1) | -0.7<br>(-2.2 to 0.7) | 3.7<br>(3.2 to 4.1)    | 3.0<br>(2.4 to 3.5)    | -2.5<br>(-4.1 to -0.9) |
| Other leukemia            | Middle SDI      | 79.3<br>(68.1 to 93.0) | 73.3<br>(62.3 to 86.8) | -0.9<br>(-2.3 to 0.7) | 4.0<br>(3.4 to 4.7)    | 3.2<br>(2.7 to 3.8)    | -2.5<br>(-4.0 to -0.9) |
| Other leukemia            | Low-middle SDI  | 31.7<br>(23.0 to 41.2) | 29.3<br>(24.6 to 36.0) | -0.9<br>(-2.9 to 1.5) | 2.2<br>(1.7 to 2.8)    | 1.8<br>(1.6 to 2.3)    | -2.1<br>(-3.8 to -0.0) |
| Other leukemia            | Low SDI         | 21.9<br>(12.0 to 31.7) | 22.0<br>(14.4 to 29.2) | 0.0<br>(-2.7 to 3.5)  | 2.3<br>(1.5 to 3.1)    | 2.0<br>(1.4 to 2.6)    | -1.4<br>(-3.5 to 1.0)  |
| Other malignant neoplasms | Global          | 652<br>(594 to 686)    | 831<br>(741 to 906)    | 2.7<br>(2.0 to 3.4)   | 9.9<br>(9.0 to 10.5)   | 10.4<br>(9.3 to 11.4)  | 0.5<br>(-0.2 to 1.2)   |
| Other malignant neoplasms | High SDI        | 182<br>(163 to 190)    | 209<br>(184 to 230)    | 1.5<br>(0.6 to 2.4)   | 14.3<br>(13.0 to 14.9) | 14.2<br>(12.8 to 15.6) | -0.1<br>(-1.1 to 0.8)  |
| Other malignant neoplasms | High-middle SDI | 173<br>(158 to 181)    | 215<br>(193 to 237)    | 2.4<br>(1.5 to 3.4)   | 11.6<br>(10.7 to 12.1) | 12.3<br>(11.1 to 13.4) | 0.7<br>(-0.3 to 1.6)   |
| Other malignant neoplasms | Middle SDI      | 165<br>(148 to 175)    | 230<br>(201 to 256)    | 3.7<br>(2.6 to 4.7)   | 8.4<br>(7.5 to 8.9)    | 9.5<br>(8.3 to 10.6)   | 1.5<br>(0.5 to 2.4)    |
| Other malignant neoplasms | Low-middle SDI  | 90.8<br>(76.6 to 102)  | 121<br>(100 to 139)    | 3.2<br>(2.3 to 4.2)   | 7.3<br>(6.1 to 8.2)    | 8.1<br>(6.6 to 9.3)    | 1.0<br>(0.1 to 2.0)    |
| Other malignant neoplasms | Low SDI         | 41.4<br>(36.0 to 47.0) | 56.6<br>(48.0 to 65.2) | 3.5<br>(2.5 to 4.4)   | 7.3<br>(6.2 to 8.2)    | 7.6<br>(6.4 to 8.7)    | 0.6<br>(-0.4 to 1.4)   |

Abbreviations: 95% UI, 95% uncertainty interval; NMSC, non-melanoma skin cancer; SDI, sociodemographic index.

Footnote: Sociodemographic index (SDI) quintiles do not sum exactly to the global total because several territories are included in the global total but not in any SDI quintile totals. "Total cancers" in this table excludes the "Other neoplasms" category of benign and in situ neoplasms.

eTable 17: Trends in mortality globally, and by SDI quintile, both sexes, 2010 to 2019

| Cause                      | Location        | Mortality 2010, thousands (95% UI) | Mortality 2019, thousands (95% UI) | Annualized rate of change 2010-2019, counts (95% UI) | Age-standardized mortality 2010, per 100,000 (95% UI) | Age-standardized mortality 2019, per 100,000 (95% UI) | Annualized rate of change 2010-2019, age-standardized rate (95% UI) |
|----------------------------|-----------------|------------------------------------|------------------------------------|------------------------------------------------------|-------------------------------------------------------|-------------------------------------------------------|---------------------------------------------------------------------|
| Total cancers              | Global          | 8 290<br>(7 890 to 8 570)          | 10 000<br>(9 360 to 10 600)        | 2.1<br>(1.5 to 2.7)                                  | 132.5<br>(125.5 to 137.1)                             | 124.7<br>(116.4 to 132.0)                             | -0.7<br>(-1.3 to -0.1)                                              |
| Total cancers              | High SDI        | 2 200<br>(2 040 to 2 280)          | 2 540<br>(2 320 to 2 650)          | 1.6<br>(1.4 to 1.8)                                  | 139.7<br>(130.8 to 144.0)                             | 130.8<br>(121.3 to 135.9)                             | -0.7<br>(-0.9 to -0.5)                                              |
| Total cancers              | High-middle SDI | 2 320<br>(2 210 to 2 420)          | 2 660<br>(2 440 to 2 860)          | 1.5<br>(0.7 to 2.3)                                  | 145.6<br>(138.1 to 151.6)                             | 132.7<br>(121.5 to 142.5)                             | -1.0<br>(-1.9 to -0.2)                                              |
| Total cancers              | Middle SDI      | 2 340<br>(2 210 to 2 460)          | 2 900<br>(2 630 to 3 160)          | 2.4<br>(1.3 to 3.5)                                  | 130.3<br>(123.0 to 137.0)                             | 121.4<br>(110.1 to 132.3)                             | -0.8<br>(-1.9 to 0.3)                                               |
| Total cancers              | Low-middle SDI  | 1 020<br>(968 to 1 080)            | 1 380<br>(1 270 to 1 490)          | 3.3<br>(2.4 to 4.1)                                  | 99.7<br>(93.8 to 105.2)                               | 102.4<br>(94.3 to 110.8)                              | 0.3<br>(-0.5 to 1.1)                                                |
| Total cancers              | Low SDI         | 403<br>(364 to 440)                | 538<br>(483 to 598)                | 3.2<br>(2.4 to 4.0)                                  | 99.7<br>(89.4 to 108.9)                               | 100.7<br>(90.0 to 111.5)                              | 0.1<br>(-0.6 to 0.8)                                                |
| Total Cancers (excl. NMSC) | Global          | 8 250<br>(7 850 to 8 520)          | 9 970<br>(9 310 to 10 500)         | 2.1<br>(1.5 to 2.7)                                  | 131.8<br>(124.8 to 136.3)                             | 123.9<br>(115.7 to 131.2)                             | -0.7<br>(-1.3 to -0.1)                                              |
| Total Cancers (excl. NMSC) | High SDI        | 2 190<br>(2 030 to 2 270)          | 2 530<br>(2 310 to 2 640)          | 1.6<br>(1.4 to 1.8)                                  | 139.1<br>(130.3 to 143.4)                             | 130.2<br>(120.8 to 135.3)                             | -0.7<br>(-0.9 to -0.5)                                              |
| Total Cancers (excl. NMSC) | High-middle SDI | 2 310<br>(2 200 to 2 400)          | 2 650<br>(2 420 to 2 850)          | 1.5<br>(0.7 to 2.3)                                  | 144.8<br>(137.3 to 150.7)                             | 131.9<br>(120.7 to 141.7)                             | -1.0<br>(-1.9 to -0.2)                                              |
| Total Cancers (excl. NMSC) | Middle SDI      | 2 320<br>(2 190 to 2 440)          | 2 880<br>(2 620 to 3 150)          | 2.4<br>(1.3 to 3.5)                                  | 129.4<br>(122.1 to 136.1)                             | 120.5<br>(109.3 to 131.4)                             | -0.8<br>(-1.9 to 0.3)                                               |
| Total Cancers (excl. NMSC) | Low-middle SDI  | 1 020<br>(962 to 1 080)            | 1 370<br>(1 260 to 1 490)          | 3.3<br>(2.4 to 4.1)                                  | 99.0<br>(93.1 to 104.6)                               | 101.7<br>(93.7 to 110.1)                              | 0.3<br>(-0.5 to 1.1)                                                |
| Total Cancers (excl. NMSC) | Low SDI         | 402<br>(364 to 438)                | 536<br>(481 to 596)                | 3.2<br>(2.4 to 4.0)                                  | 99.3<br>(89.2 to 108.4)                               | 100.3<br>(89.6 to 110.9)                              | 0.1<br>(-0.6 to 0.8)                                                |
| Lip and oral cavity cancer | Global          | 157<br>(151 to 164)                | 199<br>(182 to 218)                | 2.6<br>(1.7 to 3.5)                                  | 2.4<br>(2.3 to 2.6)                                   | 2.4<br>(2.2 to 2.7)                                   | -0.0<br>(-0.9 to 0.9)                                               |

|                            |                 |                        |                        |                      |                     |                     |                        |
|----------------------------|-----------------|------------------------|------------------------|----------------------|---------------------|---------------------|------------------------|
| Lip and oral cavity cancer | High SDI        | 26.2<br>(24.5 to 27.1) | 29.4<br>(27.1 to 31.0) | 1.3<br>(0.9 to 1.7)  | 1.7<br>(1.6 to 1.8) | 1.6<br>(1.5 to 1.7) | -0.9<br>(-1.3 to -0.5) |
| Lip and oral cavity cancer | High-middle SDI | 32.9<br>(31.7 to 34.0) | 37.5<br>(34.6 to 40.5) | 1.4<br>(0.5 to 2.3)  | 2.0<br>(2.0 to 2.1) | 1.9<br>(1.7 to 2.0) | -1.0<br>(-1.9 to -0.2) |
| Lip and oral cavity cancer | Middle SDI      | 39.6<br>(37.4 to 42.7) | 52.1<br>(46.1 to 58.8) | 3.1<br>(1.8 to 4.3)  | 2.2<br>(2.0 to 2.3) | 2.2<br>(1.9 to 2.4) | -0.0<br>(-1.2 to 1.1)  |
| Lip and oral cavity cancer | Low-middle SDI  | 43.8<br>(40.9 to 46.8) | 60.3<br>(53.1 to 69.0) | 3.5<br>(2.0 to 5.1)  | 4.2<br>(3.9 to 4.5) | 4.4<br>(3.9 to 5.0) | 0.6<br>(-0.9 to 2.1)   |
| Lip and oral cavity cancer | Low SDI         | 14.7<br>(13.1 to 16.2) | 20.0<br>(17.7 to 22.4) | 3.4<br>(1.8 to 5.0)  | 3.7<br>(3.3 to 4.1) | 3.8<br>(3.3 to 4.2) | 0.3<br>(-1.3 to 1.8)   |
| Nasopharynx cancer         | Global          | 61.7<br>(58.4 to 65.2) | 71.6<br>(65.4 to 77.6) | 1.7<br>(0.6 to 2.6)  | 0.9<br>(0.9 to 1.0) | 0.9<br>(0.8 to 0.9) | -0.7<br>(-1.8 to 0.2)  |
| Nasopharynx cancer         | High SDI        | 4.99<br>(4.78 to 5.13) | 5.55<br>(5.14 to 5.98) | 1.2<br>(0.5 to 1.9)  | 0.4<br>(0.3 to 0.4) | 0.3<br>(0.3 to 0.4) | -0.6<br>(-1.3 to 0.2)  |
| Nasopharynx cancer         | High-middle SDI | 15.4<br>(14.2 to 16.7) | 17.2<br>(14.9 to 19.7) | 1.2<br>(-0.4 to 2.9) | 0.9<br>(0.9 to 1.0) | 0.9<br>(0.8 to 1.0) | -0.8<br>(-2.5 to 0.8)  |
| Nasopharynx cancer         | Middle SDI      | 25.1<br>(23.5 to 27.1) | 28.7<br>(25.6 to 32.1) | 1.5<br>(0.2 to 2.9)  | 1.3<br>(1.2 to 1.4) | 1.1<br>(1.0 to 1.2) | -1.3<br>(-2.6 to 0.0)  |
| Nasopharynx cancer         | Low-middle SDI  | 11.8<br>(10.9 to 12.8) | 14.5<br>(13.2 to 16.1) | 2.3<br>(1.2 to 3.3)  | 1.0<br>(0.9 to 1.1) | 1.0<br>(0.9 to 1.1) | -0.5<br>(-1.5 to 0.6)  |
| Nasopharynx cancer         | Low SDI         | 4.36<br>(3.93 to 4.84) | 5.54<br>(4.90 to 6.23) | 2.7<br>(1.4 to 3.9)  | 0.9<br>(0.9 to 1.0) | 0.9<br>(0.8 to 1.0) | -0.4<br>(-1.6 to 0.8)  |
| Other pharynx cancer       | Global          | 87.5<br>(83.3 to 91.7) | 114<br>(103 to 126)    | 3.0<br>(1.9 to 4.0)  | 1.3<br>(1.3 to 1.4) | 1.4<br>(1.2 to 1.5) | 0.3<br>(-0.8 to 1.4)   |
| Other pharynx cancer       | High SDI        | 14.4<br>(13.9 to 14.8) | 16.4<br>(15.4 to 17.4) | 1.4<br>(0.9 to 2.1)  | 1.0<br>(1.0 to 1.0) | 0.9<br>(0.9 to 1.0) | -0.6<br>(-1.2 to 0.0)  |
| Other pharynx cancer       | High-middle SDI | 15.4<br>(15.0 to 15.8) | 18.0<br>(16.7 to 19.3) | 1.7<br>(0.9 to 2.5)  | 0.9<br>(0.9 to 1.0) | 0.9<br>(0.8 to 0.9) | -0.7<br>(-1.5 to 0.1)  |
| Other pharynx cancer       | Middle SDI      | 18.7<br>(17.6 to 20.1) | 25.6<br>(22.3 to 28.8) | 3.5<br>(2.1 to 4.7)  | 1.0<br>(0.9 to 1.0) | 1.0<br>(0.9 to 1.1) | 0.4<br>(-1.0 to 1.6)   |
| Other pharynx cancer       | Low-middle SDI  | 32.1<br>(29.5 to 34.6) | 44.7<br>(38.6 to 51.8) | 3.7<br>(1.9 to 5.4)  | 3.0<br>(2.8 to 3.3) | 3.2<br>(2.8 to 3.7) | 0.7<br>(-1.0 to 2.5)   |
| Other pharynx cancer       | Low SDI         | 6.76<br>(5.87 to 7.52) | 9.46<br>(8.11 to 11.0) | 3.7<br>(2.1 to 5.4)  | 1.7<br>(1.4 to 1.9) | 1.8<br>(1.5 to 2.1) | 0.7<br>(-1.0 to 2.3)   |

|                         |                 |                        |                           |                       |                        |                        |                        |
|-------------------------|-----------------|------------------------|---------------------------|-----------------------|------------------------|------------------------|------------------------|
| Esophageal cancer       | Global          | 453<br>(366 to 485)    | 498<br>(438 to 551)       | 1.1<br>(-0.2 to 2.6)  | 7.2<br>(5.8 to 7.7)    | 6.1<br>(5.4 to 6.8)    | -1.8<br>(-3.0 to -0.3) |
| Esophageal cancer       | High SDI        | 68.4<br>(64.6 to 70.9) | 79.1<br>(73.6 to 83.1)    | 1.6<br>(1.3 to 2.0)   | 4.4<br>(4.2 to 4.6)    | 4.2<br>(3.9 to 4.4)    | -0.6<br>(-1.0 to -0.3) |
| Esophageal cancer       | High-middle SDI | 121<br>(92.2 to 133)   | 136<br>(108 to 157)       | 1.3<br>(-0.5 to 2.9)  | 7.5<br>(5.7 to 8.2)    | 6.6<br>(5.3 to 7.6)    | -1.3<br>(-3.1 to 0.3)  |
| Esophageal cancer       | Middle SDI      | 194<br>(128 to 214)    | 194<br>(158 to 224)       | -0.0<br>(-1.8 to 2.9) | 11.1<br>(7.2 to 12.2)  | 8.1<br>(6.5 to 9.4)    | -3.4<br>(-5.1 to -0.5) |
| Esophageal cancer       | Low-middle SDI  | 47.6<br>(43.4 to 65.6) | 60.7<br>(54.0 to 85.6)    | 2.7<br>(1.7 to 3.6)   | 4.7<br>(4.3 to 6.5)    | 4.5<br>(4.0 to 6.4)    | -0.5<br>(-1.4 to 0.5)  |
| Esophageal cancer       | Low SDI         | 22.0<br>(18.8 to 25.2) | 28.7<br>(23.8 to 34.3)    | 3.0<br>(1.9 to 4.1)   | 5.9<br>(5.0 to 6.7)    | 5.7<br>(4.8 to 6.8)    | -0.4<br>(-1.4 to 0.7)  |
| Stomach cancer          | Global          | 922<br>(870 to 970)    | 957<br>(871 to 1 030)     | 0.4<br>(-0.5 to 1.4)  | 14.7<br>(13.8 to 15.5) | 11.9<br>(10.8 to 12.8) | -2.4<br>(-3.3 to -1.4) |
| Stomach cancer          | High SDI        | 140<br>(127 to 146)    | 145<br>(129 to 154)       | 0.4<br>(0.1 to 0.7)   | 8.7<br>(8.0 to 9.0)    | 7.2<br>(6.5 to 7.6)    | -2.1<br>(-2.4 to -1.8) |
| Stomach cancer          | High-middle SDI | 284<br>(266 to 301)    | 281<br>(251 to 309)       | -0.1<br>(-1.3 to 1.0) | 17.6<br>(16.4 to 18.7) | 13.8<br>(12.4 to 15.2) | -2.7<br>(-3.9 to -1.5) |
| Stomach cancer          | Middle SDI      | 342<br>(317 to 367)    | 345<br>(305 to 388)       | 0.1<br>(-1.3 to 1.6)  | 19.5<br>(18.1 to 20.8) | 14.6<br>(13.0 to 16.3) | -3.2<br>(-4.6 to -1.8) |
| Stomach cancer          | Low-middle SDI  | 121<br>(114 to 128)    | 142<br>(130 to 155)       | 1.8<br>(0.8 to 2.6)   | 12.2<br>(11.4 to 12.9) | 10.8<br>(9.9 to 11.8)  | -1.3<br>(-2.2 to -0.5) |
| Stomach cancer          | Low SDI         | 36.3<br>(32.6 to 39.7) | 43.9<br>(39.3 to 48.9)    | 2.1<br>(1.4 to 2.9)   | 9.9<br>(9.0 to 10.8)   | 8.9<br>(8.1 to 9.9)    | -1.2<br>(-1.8 to -0.5) |
| Colon and rectum cancer | Global          | 858<br>(806 to 892)    | 1 090<br>(1 000 to 1 150) | 2.6<br>(2.0 to 3.2)   | 14.1<br>(13.2 to 14.7) | 13.7<br>(12.6 to 14.5) | -0.3<br>(-0.9 to 0.2)  |
| Colon and rectum cancer | High SDI        | 281<br>(257 to 294)    | 328<br>(295 to 346)       | 1.7<br>(1.4 to 1.9)   | 17.3<br>(16.0 to 18.0) | 16.3<br>(14.9 to 17.1) | -0.7<br>(-0.9 to -0.5) |
| Colon and rectum cancer | High-middle SDI | 271<br>(257 to 281)    | 327<br>(300 to 350)       | 2.1<br>(1.4 to 2.8)   | 17.1<br>(16.1 to 17.8) | 16.2<br>(14.9 to 17.4) | -0.6<br>(-1.3 to 0.1)  |
| Colon and rectum cancer | Middle SDI      | 205<br>(193 to 217)    | 280<br>(251 to 306)       | 3.5<br>(2.4 to 4.5)   | 11.8<br>(11.0 to 12.5) | 12.0<br>(10.8 to 13.1) | 0.2<br>(-0.8 to 1.1)   |
| Colon and rectum cancer | Low-middle SDI  | 77.1<br>(72.5 to 81.8) | 117<br>(106 to 128)       | 4.6<br>(3.6 to 5.5)   | 8.0<br>(7.5 to 8.5)    | 9.1<br>(8.2 to 9.9)    | 1.4<br>(0.4 to 2.4)    |

|                                      |                 |                        |                        |                     |                     |                      |                        |
|--------------------------------------|-----------------|------------------------|------------------------|---------------------|---------------------|----------------------|------------------------|
| Colon and rectum cancer              | Low SDI         | 23.4<br>(20.9 to 26.5) | 34.7<br>(31.0 to 38.6) | 4.4<br>(3.2 to 5.4) | 6.6<br>(5.9 to 7.6) | 7.3<br>(6.5 to 8.1)  | 1.1<br>(-0.0 to 2.1)   |
| Liver cancer                         | Global          | 386<br>(366 to 405)    | 485<br>(444 to 526)    | 2.5<br>(1.6 to 3.4) | 6.0<br>(5.7 to 6.3) | 5.9<br>(5.4 to 6.4)  | -0.2<br>(-1.1 to 0.7)  |
| Liver cancer                         | High SDI        | 97.0<br>(89.7 to 101)  | 112<br>(102 to 119)    | 1.6<br>(1.0 to 2.0) | 6.2<br>(5.8 to 6.5) | 5.9<br>(5.4 to 6.2)  | -0.6<br>(-1.3 to -0.2) |
| Liver cancer                         | High-middle SDI | 83.4<br>(78.2 to 88.6) | 97.2<br>(87.2 to 108)  | 1.7<br>(0.3 to 3.0) | 5.1<br>(4.8 to 5.5) | 4.8<br>(4.3 to 5.4)  | -0.7<br>(-2.1 to 0.6)  |
| Liver cancer                         | Middle SDI      | 147<br>(138 to 159)    | 197<br>(173 to 223)    | 3.2<br>(1.7 to 4.7) | 7.8<br>(7.3 to 8.4) | 7.9<br>(7.0 to 8.9)  | 0.1<br>(-1.4 to 1.5)   |
| Liver cancer                         | Low-middle SDI  | 42.1<br>(38.8 to 45.2) | 57.2<br>(52.1 to 63.5) | 3.4<br>(2.4 to 4.4) | 4.1<br>(3.7 to 4.4) | 4.2<br>(3.9 to 4.7)  | 0.4<br>(-0.6 to 1.4)   |
| Liver cancer                         | Low SDI         | 16.4<br>(14.8 to 18.1) | 20.8<br>(18.2 to 23.3) | 2.6<br>(1.6 to 3.6) | 4.2<br>(3.8 to 4.6) | 3.9<br>(3.5 to 4.4)  | -0.7<br>(-1.6 to 0.2)  |
| Gallbladder and biliary tract cancer | Global          | 143<br>(121 to 152)    | 172<br>(145 to 189)    | 2.1<br>(1.4 to 2.9) | 2.4<br>(2.0 to 2.5) | 2.2<br>(1.8 to 2.4)  | -0.9<br>(-1.6 to -0.1) |
| Gallbladder and biliary tract cancer | High SDI        | 42.5<br>(33.5 to 45.8) | 48.4<br>(38.3 to 53.4) | 1.5<br>(1.0 to 1.9) | 2.6<br>(2.1 to 2.8) | 2.3<br>(1.9 to 2.5)  | -1.1<br>(-1.5 to -0.6) |
| Gallbladder and biliary tract cancer | High-middle SDI | 39.2<br>(30.2 to 42.0) | 44.0<br>(33.5 to 49.4) | 1.3<br>(0.4 to 2.3) | 2.5<br>(1.9 to 2.7) | 2.2<br>(1.7 to 2.4)  | -1.4<br>(-2.3 to -0.5) |
| Gallbladder and biliary tract cancer | Middle SDI      | 33.6<br>(30.1 to 36.9) | 42.3<br>(36.9 to 49.2) | 2.6<br>(1.4 to 3.9) | 2.0<br>(1.8 to 2.2) | 1.8<br>(1.6 to 2.1)  | -0.9<br>(-2.0 to 0.4)  |
| Gallbladder and biliary tract cancer | Low-middle SDI  | 20.8<br>(18.3 to 24.6) | 28.7<br>(25.3 to 33.1) | 3.6<br>(2.4 to 4.8) | 2.2<br>(1.9 to 2.6) | 2.2<br>(2.0 to 2.6)  | 0.4<br>(-0.8 to 1.5)   |
| Gallbladder and biliary tract cancer | Low SDI         | 6.65<br>(5.53 to 7.72) | 8.95<br>(7.45 to 10.3) | 3.3<br>(2.1 to 4.6) | 1.9<br>(1.6 to 2.2) | 1.9<br>(1.6 to 2.2)  | 0.1<br>(-1.0 to 1.4)   |
| Pancreatic cancer                    | Global          | 389<br>(367 to 404)    | 531<br>(492 to 567)    | 3.5<br>(2.9 to 4.0) | 6.3<br>(5.9 to 6.6) | 6.6<br>(6.1 to 7.1)  | 0.5<br>(-0.1 to 1.0)   |
| Pancreatic cancer                    | High SDI        | 152<br>(140 to 158)    | 190<br>(171 to 201)    | 2.5<br>(2.1 to 2.8) | 9.5<br>(8.9 to 9.9) | 9.6<br>(8.8 to 10.2) | 0.1<br>(-0.2 to 0.5)   |
| Pancreatic cancer                    | High-middle SDI | 123<br>(117 to 128)    | 160<br>(146 to 171)    | 2.9<br>(2.1 to 3.7) | 7.7<br>(7.3 to 8.0) | 7.8<br>(7.2 to 8.4)  | 0.2<br>(-0.6 to 1.0)   |
| Pancreatic cancer                    | Middle SDI      | 77.2<br>(72.2 to 82.4) | 120<br>(107 to 135)    | 4.9<br>(3.9 to 5.9) | 4.4<br>(4.1 to 4.7) | 5.0<br>(4.5 to 5.6)  | 1.5<br>(0.6 to 2.5)    |

|                                     |                 |                           |                           |                      |                        |                        |                        |
|-------------------------------------|-----------------|---------------------------|---------------------------|----------------------|------------------------|------------------------|------------------------|
| Pancreatic cancer                   | Low-middle SDI  | 28.7<br>(26.9 to 30.8)    | 48.5<br>(44.3 to 53.1)    | 5.8<br>(4.8 to 6.8)  | 3.0<br>(2.8 to 3.2)    | 3.8<br>(3.4 to 4.1)    | 2.6<br>(1.6 to 3.6)    |
| Pancreatic cancer                   | Low SDI         | 8.04<br>(6.84 to 9.28)    | 12.9<br>(11.3 to 14.7)    | 5.3<br>(4.1 to 6.6)  | 2.3<br>(1.9 to 2.6)    | 2.7<br>(2.4 to 3.1)    | 2.0<br>(0.9 to 3.2)    |
| Larynx cancer                       | Global          | 105<br>(101 to 109)       | 123<br>(115 to 133)       | 1.8<br>(1.0 to 2.5)  | 1.6<br>(1.6 to 1.7)    | 1.5<br>(1.4 to 1.6)    | -1.0<br>(-1.7 to -0.3) |
| Larynx cancer                       | High SDI        | 13.2<br>(12.6 to 13.5)    | 14.6<br>(13.7 to 15.3)    | 1.1<br>(0.8 to 1.5)  | 0.9<br>(0.8 to 0.9)    | 0.8<br>(0.7 to 0.8)    | -1.0<br>(-1.4 to -0.6) |
| Larynx cancer                       | High-middle SDI | 29.1<br>(28.1 to 29.9)    | 30.4<br>(28.1 to 32.5)    | 0.5<br>(-0.3 to 1.2) | 1.8<br>(1.7 to 1.8)    | 1.5<br>(1.4 to 1.6)    | -2.1<br>(-2.9 to -1.3) |
| Larynx cancer                       | Middle SDI      | 28.1<br>(26.8 to 29.6)    | 34.9<br>(31.6 to 38.2)    | 2.4<br>(1.4 to 3.4)  | 1.5<br>(1.5 to 1.6)    | 1.4<br>(1.3 to 1.6)    | -0.9<br>(-1.9 to 0.0)  |
| Larynx cancer                       | Low-middle SDI  | 25.5<br>(23.5 to 27.7)    | 32.1<br>(28.7 to 36.2)    | 2.6<br>(1.2 to 3.9)  | 2.4<br>(2.3 to 2.7)    | 2.3<br>(2.1 to 2.6)    | -0.5<br>(-1.8 to 0.7)  |
| Larynx cancer                       | Low SDI         | 9.10<br>(7.99 to 10.1)    | 11.2<br>(9.79 to 12.8)    | 2.3<br>(0.9 to 3.8)  | 2.3<br>(2.1 to 2.6)    | 2.2<br>(1.9 to 2.5)    | -0.9<br>(-2.2 to 0.5)  |
| Tracheal, bronchus, and lung cancer | Global          | 1 670<br>(1 590 to 1 740) | 2 040<br>(1 880 to 2 190) | 2.2<br>(1.4 to 3.1)  | 26.7<br>(25.3 to 27.8) | 25.2<br>(23.2 to 27.0) | -0.7<br>(-1.5 to 0.2)  |
| Tracheal, bronchus, and lung cancer | High SDI        | 515<br>(482 to 532)       | 578<br>(534 to 603)       | 1.3<br>(1.0 to 1.5)  | 32.7<br>(30.9 to 33.7) | 29.8<br>(27.8 to 31.0) | -1.0<br>(-1.3 to -0.8) |
| Tracheal, bronchus, and lung cancer | High-middle SDI | 523<br>(497 to 547)       | 614<br>(559 to 670)       | 1.8<br>(0.7 to 2.9)  | 32.2<br>(30.5 to 33.6) | 29.9<br>(27.2 to 32.6) | -0.8<br>(-1.9 to 0.2)  |
| Tracheal, bronchus, and lung cancer | Middle SDI      | 473<br>(442 to 507)       | 630<br>(551 to 712)       | 3.2<br>(1.7 to 4.6)  | 26.8<br>(25.0 to 28.7) | 26.3<br>(23.0 to 29.7) | -0.2<br>(-1.6 to 1.2)  |
| Tracheal, bronchus, and lung cancer | Low-middle SDI  | 126<br>(118 to 135)       | 174<br>(158 to 190)       | 3.6<br>(2.4 to 4.6)  | 12.7<br>(11.9 to 13.6) | 13.2<br>(12.0 to 14.3) | 0.4<br>(-0.7 to 1.3)   |
| Tracheal, bronchus, and lung cancer | Low SDI         | 33.2<br>(28.2 to 39.5)    | 46.0<br>(39.6 to 53.9)    | 3.6<br>(2.4 to 4.7)  | 9.1<br>(7.7 to 10.8)   | 9.4<br>(8.1 to 10.9)   | 0.3<br>(-0.8 to 1.4)   |
| Malignant skin melanoma             | Global          | 53.4<br>(39.3 to 58.9)    | 62.8<br>(46.3 to 71.0)    | 1.8<br>(1.3 to 2.4)  | 0.9<br>(0.6 to 0.9)    | 0.8<br>(0.6 to 0.9)    | -0.9<br>(-1.4 to -0.4) |
| Malignant skin melanoma             | High SDI        | 25.4<br>(16.5 to 28.2)    | 29.4<br>(19.5 to 34.2)    | 1.7<br>(1.1 to 2.3)  | 1.7<br>(1.1 to 1.9)    | 1.6<br>(1.1 to 1.9)    | -0.5<br>(-1.1 to 0.3)  |
| Malignant skin melanoma             | High-middle SDI | 16.1<br>(11.7 to 18.0)    | 18.0<br>(12.9 to 20.2)    | 1.2<br>(0.5 to 1.9)  | 1.0<br>(0.7 to 1.1)    | 0.9<br>(0.7 to 1.0)    | -1.1<br>(-1.9 to -0.4) |



|                          |                 |                         |                        |                     |                       |                      |                        |
|--------------------------|-----------------|-------------------------|------------------------|---------------------|-----------------------|----------------------|------------------------|
| Malignant skin melanoma  | Middle SDI      | 6.73<br>(5.28 to 7.93)  | 8.56<br>(6.75 to 10.2) | 2.7<br>(1.5 to 3.7) | 0.4<br>(0.3 to 0.4)   | 0.4<br>(0.3 to 0.4)  | -0.3<br>(-1.4 to 0.7)  |
| Malignant skin melanoma  | Low-middle SDI  | 3.16<br>(2.42 to 3.82)  | 4.16<br>(3.26 to 5.00) | 3.1<br>(2.0 to 4.0) | 0.3<br>(0.2 to 0.4)   | 0.3<br>(0.2 to 0.4)  | 0.0<br>(-0.9 to 0.9)   |
| Malignant skin melanoma  | Low SDI         | 2.02<br>(1.49 to 2.57)  | 2.71<br>(2.01 to 3.44) | 3.3<br>(1.7 to 4.7) | 0.5<br>(0.4 to 0.6)   | 0.5<br>(0.4 to 0.6)  | 0.0<br>(-1.4 to 1.2)   |
| Non-melanoma skin cancer | Global          | 43.3<br>(39.3 to 45.3)  | 56.1<br>(50.4 to 59.8) | 2.9<br>(2.3 to 3.5) | 0.7<br>(0.7 to 0.8)   | 0.7<br>(0.7 to 0.8)  | -0.3<br>(-0.9 to 0.3)  |
| Non-melanoma skin cancer | High SDI        | 9.84<br>(8.65 to 10.4)  | 13.0<br>(11.1 to 13.9) | 3.1<br>(2.7 to 3.4) | 0.6<br>(0.5 to 0.6)   | 0.6<br>(0.5 to 0.6)  | 0.4<br>(0.1 to 0.7)    |
| Non-melanoma skin cancer | High-middle SDI | 12.5<br>(11.6 to 13.1)  | 15.5<br>(13.9 to 16.6) | 2.3<br>(1.6 to 3.0) | 0.9<br>(0.8 to 0.9)   | 0.8<br>(0.7 to 0.9)  | -0.8<br>(-1.5 to -0.2) |
| Non-melanoma skin cancer | Middle SDI      | 13.7<br>(12.7 to 14.5)  | 17.7<br>(15.8 to 19.4) | 2.8<br>(1.8 to 3.8) | 0.9<br>(0.8 to 1.0)   | 0.8<br>(0.7 to 0.9)  | -0.8<br>(-1.7 to 0.1)  |
| Non-melanoma skin cancer | Low-middle SDI  | 5.78<br>(5.06 to 6.23)  | 7.86<br>(6.86 to 8.61) | 3.4<br>(2.5 to 4.2) | 0.7<br>(0.6 to 0.8)   | 0.7<br>(0.6 to 0.8)  | -0.2<br>(-1.0 to 0.5)  |
| Non-melanoma skin cancer | Low SDI         | 1.36<br>(0.904 to 1.61) | 1.97<br>(1.31 to 2.35) | 4.1<br>(3.2 to 4.9) | 0.5<br>(0.3 to 0.5)   | 0.5<br>(0.3 to 0.6)  | 0.5<br>(-0.3 to 1.3)   |
| Breast cancer            | Global          | 565<br>(536 to 586)     | 701<br>(647 to 752)    | 2.4<br>(1.7 to 3.1) | 8.8<br>(8.3 to 9.2)   | 8.6<br>(7.9 to 9.2)  | -0.3<br>(-1.0 to 0.4)  |
| Breast cancer            | High SDI        | 152<br>(140 to 159)     | 168<br>(152 to 177)    | 1.1<br>(0.7 to 1.4) | 10.0<br>(9.3 to 10.3) | 9.0<br>(8.4 to 9.5)  | -1.1<br>(-1.4 to -0.7) |
| Breast cancer            | High-middle SDI | 147<br>(139 to 152)     | 166<br>(153 to 180)    | 1.4<br>(0.5 to 2.2) | 9.2<br>(8.7 to 9.5)   | 8.3<br>(7.6 to 9.0)  | -1.1<br>(-1.9 to -0.2) |
| Breast cancer            | Middle SDI      | 141<br>(134 to 149)     | 185<br>(166 to 205)    | 3.0<br>(1.8 to 4.1) | 7.2<br>(6.8 to 7.6)   | 7.3<br>(6.6 to 8.1)  | 0.1<br>(-1.0 to 1.2)   |
| Breast cancer            | Low-middle SDI  | 87.6<br>(80.5 to 95.3)  | 127<br>(110 to 145)    | 4.2<br>(2.7 to 5.5) | 8.0<br>(7.3 to 8.7)   | 8.9<br>(7.8 to 10.2) | 1.2<br>(-0.2 to 2.6)   |
| Breast cancer            | Low SDI         | 36.5<br>(32.3 to 40.8)  | 54.5<br>(47.5 to 62.1) | 4.4<br>(3.1 to 5.8) | 8.8<br>(7.9 to 9.9)   | 9.8<br>(8.6 to 11.1) | 1.2<br>(-0.1 to 2.4)   |
| Cervical cancer          | Global          | 238<br>(211 to 269)     | 280<br>(239 to 314)    | 1.8<br>(0.9 to 2.8) | 3.6<br>(3.2 to 4.1)   | 3.4<br>(2.9 to 3.8)  | -0.6<br>(-1.5 to 0.4)  |
| Cervical cancer          | High SDI        | 24.2<br>(21.5 to 25.5)  | 26.2<br>(22.8 to 28.1) | 0.9<br>(0.5 to 1.4) | 1.7<br>(1.5 to 1.7)   | 1.5<br>(1.4 to 1.6)  | -0.9<br>(-1.4 to -0.5) |

|                 |                 |                        |                        |                      |                     |                     |                        |
|-----------------|-----------------|------------------------|------------------------|----------------------|---------------------|---------------------|------------------------|
| Cervical cancer | High-middle SDI | 47.5<br>(42.2 to 50.5) | 51.8<br>(41.7 to 57.9) | 1.0<br>(-0.4 to 2.2) | 2.9<br>(2.6 to 3.1) | 2.6<br>(2.1 to 2.9) | -1.2<br>(-2.5 to 0.0)  |
| Cervical cancer | Middle SDI      | 77.0<br>(63.9 to 84.0) | 90.1<br>(71.3 to 103)  | 1.8<br>(0.4 to 3.1)  | 3.9<br>(3.3 to 4.3) | 3.5<br>(2.8 to 4.1) | -1.1<br>(-2.5 to 0.2)  |
| Cervical cancer | Low-middle SDI  | 53.1<br>(47.1 to 65.2) | 66.7<br>(57.3 to 81.2) | 2.5<br>(1.2 to 3.8)  | 4.7<br>(4.2 to 5.8) | 4.6<br>(3.9 to 5.6) | -0.3<br>(-1.6 to 0.9)  |
| Cervical cancer | Low SDI         | 36.0<br>(28.6 to 42.9) | 45.5<br>(35.8 to 56.3) | 2.6<br>(1.4 to 3.9)  | 8.1<br>(6.5 to 9.7) | 7.7<br>(6.1 to 9.4) | -0.6<br>(-1.7 to 0.6)  |
| Uterine cancer  | Global          | 79.6<br>(69.2 to 84.1) | 91.6<br>(82.4 to 102)  | 1.6<br>(0.8 to 2.7)  | 1.3<br>(1.1 to 1.4) | 1.1<br>(1.0 to 1.3) | -1.3<br>(-2.0 to -0.3) |
| Uterine cancer  | High SDI        | 22.2<br>(20.1 to 23.2) | 26.6<br>(24.0 to 28.1) | 2.0<br>(1.8 to 2.3)  | 1.4<br>(1.3 to 1.4) | 1.4<br>(1.2 to 1.4) | -0.2<br>(-0.5 to 0.1)  |
| Uterine cancer  | High-middle SDI | 24.4<br>(22.0 to 25.8) | 26.4<br>(24.0 to 28.8) | 0.9<br>(-0.0 to 2.0) | 1.5<br>(1.4 to 1.6) | 1.3<br>(1.2 to 1.4) | -1.8<br>(-2.7 to -0.7) |
| Uterine cancer  | Middle SDI      | 20.0<br>(14.1 to 22.0) | 21.0<br>(17.5 to 24.3) | 0.5<br>(-1.1 to 3.3) | 1.1<br>(0.8 to 1.2) | 0.9<br>(0.7 to 1.0) | -2.6<br>(-4.1 to -0.1) |
| Uterine cancer  | Low-middle SDI  | 9.12<br>(7.92 to 11.1) | 12.2<br>(10.4 to 15.3) | 3.3<br>(2.1 to 4.5)  | 0.9<br>(0.8 to 1.1) | 0.9<br>(0.8 to 1.2) | 0.1<br>(-1.0 to 1.3)   |
| Uterine cancer  | Low SDI         | 3.80<br>(3.10 to 4.69) | 5.30<br>(4.32 to 6.64) | 3.7<br>(2.5 to 5.0)  | 1.0<br>(0.8 to 1.3) | 1.1<br>(0.9 to 1.4) | 0.4<br>(-0.8 to 1.6)   |
| Ovarian cancer  | Global          | 153<br>(142 to 165)    | 198<br>(175 to 218)    | 2.9<br>(1.9 to 3.6)  | 2.4<br>(2.2 to 2.6) | 2.4<br>(2.1 to 2.7) | 0.1<br>(-0.8 to 0.8)   |
| Ovarian cancer  | High SDI        | 50.9<br>(46.5 to 53.4) | 56.6<br>(50.4 to 61.3) | 1.2<br>(0.7 to 1.6)  | 3.3<br>(3.1 to 3.4) | 3.0<br>(2.7 to 3.3) | -0.9<br>(-1.4 to -0.5) |
| Ovarian cancer  | High-middle SDI | 44.4<br>(41.3 to 46.6) | 52.0<br>(45.0 to 57.2) | 1.8<br>(0.6 to 2.7)  | 2.7<br>(2.5 to 2.9) | 2.6<br>(2.2 to 2.8) | -0.7<br>(-1.8 to 0.3)  |
| Ovarian cancer  | Middle SDI      | 32.7<br>(29.1 to 37.0) | 48.5<br>(39.9 to 56.5) | 4.4<br>(2.7 to 5.6)  | 1.7<br>(1.5 to 1.9) | 1.9<br>(1.6 to 2.2) | 1.4<br>(-0.2 to 2.6)   |
| Ovarian cancer  | Low-middle SDI  | 18.5<br>(16.1 to 22.4) | 29.9<br>(24.4 to 37.6) | 5.3<br>(3.2 to 6.8)  | 1.7<br>(1.5 to 2.1) | 2.1<br>(1.7 to 2.7) | 2.3<br>(0.3 to 3.8)    |
| Ovarian cancer  | Low SDI         | 6.84<br>(5.48 to 9.99) | 11.3<br>(9.55 to 13.9) | 5.6<br>(3.0 to 7.8)  | 1.7<br>(1.3 to 2.4) | 2.0<br>(1.7 to 2.5) | 2.4<br>(-0.1 to 4.5)   |
| Prostate cancer | Global          | 378<br>(319 to 449)    | 487<br>(420 to 594)    | 2.8<br>(2.3 to 3.3)  | 6.5<br>(5.5 to 7.8) | 6.3<br>(5.4 to 7.7) | -0.4<br>(-0.9 to 0.1)  |

|                   |                 |                           |                         |                      |                      |                      |                        |
|-------------------|-----------------|---------------------------|-------------------------|----------------------|----------------------|----------------------|------------------------|
| Prostate cancer   | High SDI        | 127<br>(103 to 167)       | 158<br>(131 to 215)     | 2.4<br>(2.1 to 2.9)  | 7.4<br>(6.1 to 9.6)  | 7.2<br>(6.1 to 9.9)  | -0.2<br>(-0.5 to 0.3)  |
| Prostate cancer   | High-middle SDI | 93.2<br>(78.3 to 113)     | 114<br>(97.0 to 142)    | 2.3<br>(1.6 to 2.9)  | 6.1<br>(5.1 to 7.4)  | 5.7<br>(4.8 to 7.1)  | -0.7<br>(-1.3 to -0.1) |
| Prostate cancer   | Middle SDI      | 83.5<br>(70.1 to 95.8)    | 112<br>(94.0 to 133)    | 3.3<br>(2.4 to 4.1)  | 5.8<br>(4.8 to 6.6)  | 5.5<br>(4.6 to 6.5)  | -0.6<br>(-1.4 to 0.3)  |
| Prostate cancer   | Low-middle SDI  | 48.1<br>(40.6 to 56.0)    | 66.6<br>(56.3 to 78.8)  | 3.6<br>(2.7 to 4.5)  | 6.2<br>(5.2 to 7.3)  | 6.0<br>(5.1 to 7.2)  | -0.3<br>(-1.2 to 0.6)  |
| Prostate cancer   | Low SDI         | 26.0<br>(18.8 to 30.8)    | 35.2<br>(25.9 to 41.6)  | 3.4<br>(2.5 to 4.3)  | 9.2<br>(6.6 to 10.9) | 9.1<br>(6.6 to 10.7) | -0.1<br>(-0.9 to 0.7)  |
| Testicular cancer | Global          | 9.13<br>(8.69 to 10.1)    | 10.8<br>(9.96 to 11.9)  | 1.9<br>(1.1 to 2.7)  | 0.1<br>(0.1 to 0.1)  | 0.1<br>(0.1 to 0.2)  | 0.4<br>(-0.3 to 1.2)   |
| Testicular cancer | High SDI        | 1.38<br>(1.34 to 1.43)    | 1.44<br>(1.36 to 1.53)  | 0.5<br>(-0.0 to 1.0) | 0.1<br>(0.1 to 0.1)  | 0.1<br>(0.1 to 0.1)  | -0.8<br>(-1.3 to -0.2) |
| Testicular cancer | High-middle SDI | 2.52<br>(2.42 to 2.69)    | 2.80<br>(2.56 to 3.05)  | 1.2<br>(0.3 to 2.0)  | 0.2<br>(0.2 to 0.2)  | 0.2<br>(0.2 to 0.2)  | 0.2<br>(-0.7 to 1.1)   |
| Testicular cancer | Middle SDI      | 2.72<br>(2.56 to 3.11)    | 3.38<br>(3.03 to 3.82)  | 2.4<br>(1.3 to 3.5)  | 0.1<br>(0.1 to 0.1)  | 0.1<br>(0.1 to 0.2)  | 1.0<br>(-0.1 to 2.0)   |
| Testicular cancer | Low-middle SDI  | 1.73<br>(1.56 to 2.00)    | 2.17<br>(1.89 to 2.52)  | 2.5<br>(1.1 to 4.0)  | 0.1<br>(0.1 to 0.1)  | 0.1<br>(0.1 to 0.1)  | 0.7<br>(-0.7 to 2.1)   |
| Testicular cancer | Low SDI         | 0.778<br>(0.654 to 0.915) | 1.05<br>(0.886 to 1.25) | 3.3<br>(1.4 to 5.3)  | 0.1<br>(0.1 to 0.1)  | 0.1<br>(0.1 to 0.1)  | 0.5<br>(-1.3 to 2.5)   |
| Kidney cancer     | Global          | 132<br>(125 to 136)       | 166<br>(155 to 176)     | 2.6<br>(2.0 to 3.1)  | 2.1<br>(2.0 to 2.2)  | 2.1<br>(1.9 to 2.2)  | -0.3<br>(-0.8 to 0.2)  |
| Kidney cancer     | High SDI        | 52.4<br>(48.9 to 54.2)    | 63.3<br>(57.9 to 66.7)  | 2.1<br>(1.7 to 2.5)  | 3.3<br>(3.1 to 3.4)  | 3.3<br>(3.0 to 3.4)  | -0.2<br>(-0.6 to 0.2)  |
| Kidney cancer     | High-middle SDI | 45.0<br>(43.1 to 46.4)    | 53.7<br>(49.6 to 57.1)  | 2.0<br>(1.3 to 2.6)  | 2.8<br>(2.7 to 2.9)  | 2.7<br>(2.5 to 2.8)  | -0.6<br>(-1.2 to 0.0)  |
| Kidney cancer     | Middle SDI      | 22.1<br>(20.9 to 23.6)    | 31.0<br>(27.6 to 35.5)  | 3.8<br>(2.7 to 4.9)  | 1.2<br>(1.1 to 1.3)  | 1.3<br>(1.1 to 1.5)  | 0.6<br>(-0.4 to 1.7)   |
| Kidney cancer     | Low-middle SDI  | 8.81<br>(8.14 to 9.45)    | 13.1<br>(11.8 to 14.5)  | 4.4<br>(3.2 to 5.8)  | 0.8<br>(0.8 to 0.9)  | 1.0<br>(0.9 to 1.1)  | 1.5<br>(0.3 to 2.9)    |
| Kidney cancer     | Low SDI         | 3.61<br>(3.01 to 4.17)    | 5.18<br>(4.47 to 5.94)  | 4.0<br>(2.6 to 5.4)  | 0.8<br>(0.7 to 0.9)  | 0.9<br>(0.8 to 1.0)  | 1.3<br>(-0.0 to 2.7)   |

|                                         |                 |                        |                        |                     |                     |                     |                        |
|-----------------------------------------|-----------------|------------------------|------------------------|---------------------|---------------------|---------------------|------------------------|
| Bladder cancer                          | Global          | 182<br>(171 to 189)    | 229<br>(211 to 243)    | 2.5<br>(2.0 to 3.1) | 3.1<br>(2.9 to 3.2) | 2.9<br>(2.7 to 3.1) | -0.6<br>(-1.1 to -0.0) |
| Bladder cancer                          | High SDI        | 61.8<br>(56.5 to 64.6) | 77.0<br>(68.5 to 82.5) | 2.4<br>(2.0 to 2.9) | 3.7<br>(3.4 to 3.8) | 3.6<br>(3.2 to 3.8) | -0.1<br>(-0.6 to 0.3)  |
| Bladder cancer                          | High-middle SDI | 59.4<br>(56.0 to 61.6) | 69.9<br>(63.9 to 74.8) | 1.8<br>(1.1 to 2.5) | 3.8<br>(3.6 to 4.0) | 3.5<br>(3.2 to 3.7) | -1.1<br>(-1.7 to -0.4) |
| Bladder cancer                          | Middle SDI      | 35.1<br>(32.8 to 37.1) | 47.0<br>(41.9 to 53.6) | 3.3<br>(2.1 to 4.4) | 2.2<br>(2.0 to 2.3) | 2.1<br>(1.9 to 2.4) | -0.3<br>(-1.3 to 0.8)  |
| Bladder cancer                          | Low-middle SDI  | 16.7<br>(15.3 to 18.2) | 22.9<br>(20.9 to 25.0) | 3.5<br>(2.4 to 4.7) | 1.9<br>(1.7 to 2.1) | 1.9<br>(1.7 to 2.1) | -0.0<br>(-1.1 to 1.1)  |
| Bladder cancer                          | Low SDI         | 8.91<br>(7.41 to 10.1) | 11.8<br>(10.3 to 13.4) | 3.1<br>(1.6 to 4.6) | 2.8<br>(2.3 to 3.2) | 2.7<br>(2.4 to 3.1) | -0.4<br>(-1.8 to 1.1)  |
| Brain and central nervous system cancer | Global          | 206<br>(162 to 224)    | 246<br>(186 to 271)    | 2.0<br>(0.8 to 2.7) | 3.1<br>(2.4 to 3.4) | 3.0<br>(2.3 to 3.4) | -0.3<br>(-1.4 to 0.4)  |
| Brain and central nervous system cancer | High SDI        | 47.2<br>(34.2 to 50.5) | 54.8<br>(38.3 to 60.0) | 1.7<br>(1.0 to 2.1) | 3.5<br>(2.6 to 3.7) | 3.4<br>(2.5 to 3.7) | -0.1<br>(-0.7 to 0.2)  |
| Brain and central nervous system cancer | High-middle SDI | 59.8<br>(45.4 to 64.5) | 68.8<br>(49.1 to 77.1) | 1.6<br>(0.4 to 2.5) | 3.9<br>(2.9 to 4.2) | 3.7<br>(2.7 to 4.1) | -0.5<br>(-1.7 to 0.4)  |
| Brain and central nervous system cancer | Middle SDI      | 60.1<br>(46.3 to 65.3) | 73.8<br>(53.5 to 83.9) | 2.3<br>(0.9 to 3.4) | 3.0<br>(2.3 to 3.3) | 3.0<br>(2.2 to 3.4) | -0.2<br>(-1.6 to 0.9)  |
| Brain and central nervous system cancer | Low-middle SDI  | 28.1<br>(22.7 to 34.0) | 34.5<br>(27.3 to 40.1) | 2.3<br>(0.7 to 3.4) | 2.2<br>(1.8 to 2.7) | 2.3<br>(1.8 to 2.6) | 0.2<br>(-1.2 to 1.2)   |
| Brain and central nervous system cancer | Low SDI         | 11.2<br>(8.28 to 15.3) | 14.3<br>(10.6 to 17.5) | 2.7<br>(0.7 to 4.4) | 1.7<br>(1.3 to 2.2) | 1.8<br>(1.3 to 2.1) | 0.3<br>(-1.2 to 1.6)   |
| Thyroid cancer                          | Global          | 37.3<br>(33.8 to 39.0) | 45.6<br>(41.3 to 48.8) | 2.2<br>(1.6 to 2.8) | 0.6<br>(0.5 to 0.6) | 0.6<br>(0.5 to 0.6) | -0.5<br>(-1.1 to 0.1)  |
| Thyroid cancer                          | High SDI        | 8.28<br>(7.14 to 8.74) | 9.38<br>(8.00 to 10.0) | 1.4<br>(1.0 to 1.8) | 0.5<br>(0.5 to 0.5) | 0.5<br>(0.4 to 0.5) | -1.0<br>(-1.4 to -0.5) |
| Thyroid cancer                          | High-middle SDI | 8.47<br>(7.81 to 8.82) | 9.45<br>(8.56 to 10.2) | 1.2<br>(0.5 to 2.0) | 0.5<br>(0.5 to 0.6) | 0.5<br>(0.4 to 0.5) | -1.3<br>(-2.0 to -0.5) |
| Thyroid cancer                          | Middle SDI      | 10.8<br>(9.92 to 11.5) | 14.0<br>(12.5 to 15.5) | 2.8<br>(1.9 to 3.7) | 0.6<br>(0.6 to 0.7) | 0.6<br>(0.5 to 0.7) | -0.4<br>(-1.3 to 0.5)  |
| Thyroid cancer                          | Low-middle SDI  | 6.71<br>(5.96 to 7.29) | 8.87<br>(7.80 to 9.84) | 3.1<br>(2.1 to 4.1) | 0.6<br>(0.6 to 0.7) | 0.7<br>(0.6 to 0.7) | 0.1<br>(-0.9 to 1.1)   |

|                      |                 |                          |                          |                       |                     |                     |                        |
|----------------------|-----------------|--------------------------|--------------------------|-----------------------|---------------------|---------------------|------------------------|
| Thyroid cancer       | Low SDI         | 2.95<br>(2.39 to 3.37)   | 3.88<br>(3.18 to 4.50)   | 3.0<br>(2.1 to 4.0)   | 0.7<br>(0.6 to 0.8) | 0.7<br>(0.6 to 0.8) | 0.0<br>(-0.9 to 0.8)   |
| Mesothelioma         | Global          | 24.5<br>(22.5 to 25.9)   | 29.3<br>(26.7 to 31.0)   | 2.0<br>(1.6 to 2.3)   | 0.4<br>(0.4 to 0.4) | 0.4<br>(0.3 to 0.4) | -0.8<br>(-1.2 to -0.5) |
| Mesothelioma         | High SDI        | 12.5<br>(11.6 to 13.0)   | 14.8<br>(13.6 to 15.6)   | 1.9<br>(1.5 to 2.2)   | 0.8<br>(0.7 to 0.8) | 0.7<br>(0.7 to 0.8) | -0.5<br>(-0.8 to -0.2) |
| Mesothelioma         | High-middle SDI | 5.81<br>(5.21 to 6.15)   | 6.43<br>(5.72 to 6.88)   | 1.1<br>(0.4 to 1.8)   | 0.4<br>(0.3 to 0.4) | 0.3<br>(0.3 to 0.3) | -1.3<br>(-2.1 to -0.6) |
| Mesothelioma         | Middle SDI      | 3.50<br>(3.13 to 3.80)   | 4.24<br>(3.83 to 4.65)   | 2.1<br>(1.1 to 3.0)   | 0.2<br>(0.2 to 0.2) | 0.2<br>(0.2 to 0.2) | -0.8<br>(-1.8 to 0.1)  |
| Mesothelioma         | Low-middle SDI  | 2.03<br>(1.63 to 2.56)   | 2.86<br>(2.35 to 3.49)   | 3.8<br>(2.6 to 5.1)   | 0.2<br>(0.2 to 0.2) | 0.2<br>(0.2 to 0.3) | 0.8<br>(-0.4 to 2.0)   |
| Mesothelioma         | Low SDI         | 0.670<br>(0.380 to 1.27) | 0.944<br>(0.549 to 1.78) | 3.8<br>(2.2 to 5.3)   | 0.2<br>(0.1 to 0.3) | 0.2<br>(0.1 to 0.3) | 0.7<br>(-0.8 to 2.1)   |
| Hodgkin lymphoma     | Global          | 26.0<br>(22.6 to 30.3)   | 27.6<br>(23.7 to 31.8)   | 0.6<br>(0.0 to 1.2)   | 0.4<br>(0.3 to 0.4) | 0.3<br>(0.3 to 0.4) | -1.3<br>(-1.9 to -0.7) |
| Hodgkin lymphoma     | High SDI        | 3.64<br>(3.18 to 4.31)   | 3.88<br>(3.42 to 4.65)   | 0.7<br>(0.4 to 1.0)   | 0.3<br>(0.2 to 0.3) | 0.2<br>(0.2 to 0.3) | -1.1<br>(-1.4 to -0.7) |
| Hodgkin lymphoma     | High-middle SDI | 5.85<br>(5.07 to 6.57)   | 5.57<br>(4.81 to 6.38)   | -0.5<br>(-1.2 to 0.1) | 0.4<br>(0.3 to 0.4) | 0.3<br>(0.3 to 0.3) | -2.2<br>(-2.8 to -1.6) |
| Hodgkin lymphoma     | Middle SDI      | 6.31<br>(5.37 to 7.42)   | 6.60<br>(5.53 to 7.67)   | 0.5<br>(-0.3 to 1.2)  | 0.3<br>(0.3 to 0.4) | 0.3<br>(0.2 to 0.3) | -1.6<br>(-2.4 to -0.9) |
| Hodgkin lymphoma     | Low-middle SDI  | 6.07<br>(5.28 to 7.87)   | 6.56<br>(5.57 to 8.37)   | 0.9<br>(-0.2 to 2.0)  | 0.5<br>(0.4 to 0.6) | 0.4<br>(0.3 to 0.5) | -1.3<br>(-2.4 to -0.2) |
| Hodgkin lymphoma     | Low SDI         | 4.14<br>(3.11 to 4.84)   | 4.91<br>(3.67 to 5.84)   | 1.9<br>(0.7 to 3.0)   | 0.7<br>(0.5 to 0.8) | 0.6<br>(0.5 to 0.7) | -1.1<br>(-2.3 to -0.1) |
| Non-Hodgkin lymphoma | Global          | 204<br>(194 to 212)      | 255<br>(238 to 270)      | 2.5<br>(2.0 to 3.0)   | 3.3<br>(3.1 to 3.4) | 3.2<br>(3.0 to 3.4) | -0.2<br>(-0.7 to 0.3)  |
| Non-Hodgkin lymphoma | High SDI        | 70.7<br>(65.0 to 73.6)   | 84.5<br>(76.3 to 89.3)   | 2.0<br>(1.7 to 2.3)   | 4.5<br>(4.2 to 4.6) | 4.3<br>(4.0 to 4.5) | -0.4<br>(-0.7 to -0.1) |
| Non-Hodgkin lymphoma | High-middle SDI | 46.8<br>(44.4 to 48.6)   | 54.7<br>(50.5 to 58.5)   | 1.7<br>(1.0 to 2.4)   | 3.0<br>(2.8 to 3.1) | 2.8<br>(2.6 to 3.0) | -0.6<br>(-1.4 to 0.1)  |
| Non-Hodgkin lymphoma | Middle SDI      | 47.6<br>(45.3 to 50.4)   | 62.2<br>(56.9 to 68.3)   | 3.0<br>(2.1 to 3.9)   | 2.5<br>(2.4 to 2.6) | 2.6<br>(2.3 to 2.8) | 0.2<br>(-0.6 to 1.1)   |

|                         |                 |                        |                        |                      |                     |                     |                        |
|-------------------------|-----------------|------------------------|------------------------|----------------------|---------------------|---------------------|------------------------|
| Non-Hodgkin lymphoma    | Low-middle SDI  | 28.0<br>(26.0 to 30.3) | 38.2<br>(34.7 to 42.4) | 3.5<br>(2.5 to 4.3)  | 2.5<br>(2.4 to 2.7) | 2.7<br>(2.5 to 3.0) | 0.8<br>(-0.2 to 1.7)   |
| Non-Hodgkin lymphoma    | Low SDI         | 11.0<br>(9.86 to 12.4) | 14.8<br>(12.7 to 17.1) | 3.3<br>(2.1 to 4.5)  | 2.4<br>(2.1 to 2.8) | 2.5<br>(2.1 to 2.9) | 0.5<br>(-0.5 to 1.3)   |
| Multiple myeloma        | Global          | 88.1<br>(77.5 to 94.1) | 113<br>(99.5 to 122)   | 2.8<br>(2.2 to 3.3)  | 1.4<br>(1.3 to 1.5) | 1.4<br>(1.2 to 1.5) | -0.2<br>(-0.8 to 0.3)  |
| Multiple myeloma        | High SDI        | 39.0<br>(33.8 to 41.1) | 48.1<br>(41.3 to 51.2) | 2.3<br>(2.0 to 2.6)  | 2.4<br>(2.1 to 2.5) | 2.4<br>(2.1 to 2.6) | -0.0<br>(-0.4 to 0.3)  |
| Multiple myeloma        | High-middle SDI | 21.8<br>(18.8 to 22.9) | 27.2<br>(22.9 to 29.6) | 2.5<br>(1.6 to 3.1)  | 1.4<br>(1.2 to 1.4) | 1.3<br>(1.1 to 1.5) | -0.2<br>(-1.1 to 0.4)  |
| Multiple myeloma        | Middle SDI      | 15.1<br>(13.2 to 17.0) | 21.1<br>(17.5 to 24.1) | 3.7<br>(2.3 to 4.7)  | 0.8<br>(0.7 to 0.9) | 0.9<br>(0.7 to 1.0) | 0.4<br>(-1.0 to 1.4)   |
| Multiple myeloma        | Low-middle SDI  | 8.50<br>(7.41 to 9.95) | 11.9<br>(10.2 to 14.0) | 3.8<br>(2.7 to 4.8)  | 0.8<br>(0.7 to 1.0) | 0.9<br>(0.8 to 1.0) | 0.6<br>(-0.5 to 1.6)   |
| Multiple myeloma        | Low SDI         | 3.59<br>(2.84 to 4.36) | 4.97<br>(3.94 to 5.77) | 3.6<br>(2.3 to 4.7)  | 1.0<br>(0.8 to 1.2) | 1.0<br>(0.8 to 1.2) | 0.3<br>(-0.9 to 1.3)   |
| Leukemia                | Global          | 300<br>(275 to 318)    | 335<br>(307 to 360)    | 1.2<br>(0.5 to 1.9)  | 4.7<br>(4.3 to 5.0) | 4.3<br>(3.9 to 4.6) | -1.0<br>(-1.7 to -0.4) |
| Leukemia                | High SDI        | 72.8<br>(66.8 to 75.6) | 85.3<br>(77.0 to 89.7) | 1.7<br>(1.5 to 2.0)  | 4.9<br>(4.5 to 5.0) | 4.6<br>(4.3 to 4.8) | -0.6<br>(-0.8 to -0.3) |
| Leukemia                | High-middle SDI | 71.1<br>(65.3 to 74.2) | 75.8<br>(68.7 to 81.3) | 0.7<br>(-0.0 to 1.4) | 4.8<br>(4.4 to 5.0) | 4.2<br>(3.8 to 4.5) | -1.4<br>(-2.1 to -0.7) |
| Leukemia                | Middle SDI      | 84.6<br>(76.9 to 91.0) | 92.2<br>(81.5 to 104)  | 1.0<br>(-0.0 to 2.0) | 4.3<br>(3.9 to 4.7) | 3.9<br>(3.4 to 4.4) | -1.2<br>(-2.1 to -0.2) |
| Leukemia                | Low-middle SDI  | 44.9<br>(39.4 to 51.7) | 51.1<br>(45.3 to 59.1) | 1.4<br>(0.3 to 2.5)  | 3.6<br>(3.2 to 4.1) | 3.5<br>(3.1 to 4.0) | -0.5<br>(-1.5 to 0.5)  |
| Leukemia                | Low SDI         | 26.0<br>(20.8 to 33.3) | 29.9<br>(24.1 to 35.5) | 1.6<br>(-0.3 to 3.4) | 4.1<br>(3.3 to 4.8) | 3.9<br>(3.1 to 4.6) | -0.5<br>(-1.7 to 0.6)  |
| Acute lymphoid leukemia | Global          | 45.5<br>(38.1 to 52.1) | 47.6<br>(39.4 to 53.0) | 0.5<br>(-0.6 to 1.6) | 0.7<br>(0.6 to 0.8) | 0.6<br>(0.5 to 0.7) | -0.8<br>(-1.9 to 0.3)  |
| Acute lymphoid leukemia | High SDI        | 4.90<br>(4.47 to 5.46) | 5.32<br>(4.72 to 5.80) | 0.9<br>(0.3 to 1.3)  | 0.4<br>(0.4 to 0.5) | 0.4<br>(0.4 to 0.5) | -0.7<br>(-1.2 to -0.2) |
| Acute lymphoid leukemia | High-middle SDI | 10.0<br>(8.73 to 10.7) | 10.3<br>(8.57 to 11.3) | 0.3<br>(-0.7 to 1.1) | 0.8<br>(0.7 to 0.8) | 0.7<br>(0.6 to 0.8) | -1.0<br>(-1.9 to -0.1) |

|                           |                 |                        |                        |                      |                     |                     |                        |
|---------------------------|-----------------|------------------------|------------------------|----------------------|---------------------|---------------------|------------------------|
| Acute lymphoid leukemia   | Middle SDI      | 16.3<br>(13.0 to 17.8) | 17.1<br>(13.1 to 19.2) | 0.5<br>(-0.6 to 1.6) | 0.8<br>(0.6 to 0.9) | 0.7<br>(0.6 to 0.8) | -0.7<br>(-1.8 to 0.4)  |
| Acute lymphoid leukemia   | Low-middle SDI  | 8.56<br>(7.04 to 10.7) | 8.63<br>(7.37 to 10.4) | 0.1<br>(-1.4 to 1.7) | 0.5<br>(0.5 to 0.7) | 0.5<br>(0.4 to 0.6) | -0.8<br>(-2.1 to 0.6)  |
| Acute lymphoid leukemia   | Low SDI         | 5.67<br>(3.98 to 8.35) | 6.32<br>(4.70 to 8.00) | 1.2<br>(-1.7 to 3.9) | 0.5<br>(0.4 to 0.7) | 0.5<br>(0.4 to 0.6) | -0.6<br>(-2.9 to 1.6)  |
| Chronic lymphoid leukemia | Global          | 35.3<br>(32.4 to 39.1) | 44.6<br>(40.4 to 50.1) | 2.6<br>(2.1 to 3.1)  | 0.6<br>(0.5 to 0.7) | 0.6<br>(0.5 to 0.6) | -0.5<br>(-1.0 to 0.0)  |
| Chronic lymphoid leukemia | High SDI        | 13.3<br>(11.8 to 15.5) | 15.3<br>(13.4 to 18.6) | 1.6<br>(1.1 to 2.2)  | 0.8<br>(0.7 to 0.9) | 0.7<br>(0.6 to 0.9) | -1.0<br>(-1.6 to -0.4) |
| Chronic lymphoid leukemia | High-middle SDI | 10.2<br>(9.42 to 11.1) | 11.9<br>(10.7 to 13.1) | 1.7<br>(1.0 to 2.3)  | 0.7<br>(0.6 to 0.7) | 0.6<br>(0.5 to 0.7) | -1.1<br>(-1.7 to -0.5) |
| Chronic lymphoid leukemia | Middle SDI      | 5.63<br>(5.09 to 6.34) | 7.91<br>(7.00 to 9.11) | 3.8<br>(2.7 to 4.9)  | 0.3<br>(0.3 to 0.4) | 0.3<br>(0.3 to 0.4) | 0.5<br>(-0.5 to 1.5)   |
| Chronic lymphoid leukemia | Low-middle SDI  | 4.13<br>(3.66 to 4.80) | 6.51<br>(5.60 to 7.61) | 5.1<br>(3.6 to 6.5)  | 0.4<br>(0.4 to 0.5) | 0.5<br>(0.4 to 0.6) | 1.9<br>(0.4 to 3.3)    |
| Chronic lymphoid leukemia | Low SDI         | 2.02<br>(1.65 to 2.38) | 2.99<br>(2.48 to 3.52) | 4.4<br>(3.2 to 5.5)  | 0.6<br>(0.5 to 0.7) | 0.7<br>(0.6 to 0.8) | 1.2<br>(0.1 to 2.3)    |
| Acute myeloid leukemia    | Global          | 77.6<br>(68.0 to 81.6) | 94.1<br>(82.6 to 101)  | 2.1<br>(1.6 to 2.7)  | 1.2<br>(1.1 to 1.3) | 1.2<br>(1.0 to 1.3) | -0.2<br>(-0.8 to 0.4)  |
| Acute myeloid leukemia    | High SDI        | 30.9<br>(25.0 to 32.6) | 36.8<br>(29.8 to 39.5) | 2.0<br>(1.6 to 2.3)  | 2.1<br>(1.7 to 2.2) | 2.0<br>(1.7 to 2.2) | -0.2<br>(-0.6 to 0.1)  |
| Acute myeloid leukemia    | High-middle SDI | 18.0<br>(15.1 to 18.9) | 20.9<br>(17.4 to 22.6) | 1.7<br>(1.0 to 2.3)  | 1.2<br>(1.0 to 1.2) | 1.1<br>(1.0 to 1.2) | -0.4<br>(-1.0 to 0.2)  |
| Acute myeloid leukemia    | Middle SDI      | 15.3<br>(13.8 to 17.6) | 18.9<br>(16.9 to 22.4) | 2.4<br>(1.4 to 3.4)  | 0.8<br>(0.7 to 0.9) | 0.8<br>(0.7 to 0.9) | 0.3<br>(-0.7 to 1.3)   |
| Acute myeloid leukemia    | Low-middle SDI  | 9.05<br>(7.99 to 11.0) | 11.6<br>(10.2 to 14.1) | 2.7<br>(1.5 to 3.9)  | 0.7<br>(0.6 to 0.9) | 0.8<br>(0.7 to 0.9) | 0.7<br>(-0.4 to 1.8)   |
| Acute myeloid leukemia    | Low SDI         | 4.40<br>(3.27 to 5.51) | 5.79<br>(4.53 to 7.00) | 3.1<br>(1.3 to 4.9)  | 0.6<br>(0.5 to 0.8) | 0.7<br>(0.5 to 0.8) | 0.8<br>(-0.5 to 2.0)   |
| Chronic myeloid leukemia  | Global          | 28.0<br>(24.9 to 31.7) | 29.9<br>(27.0 to 33.5) | 0.8<br>(-0.4 to 1.7) | 0.4<br>(0.4 to 0.5) | 0.4<br>(0.3 to 0.4) | -1.5<br>(-2.6 to -0.6) |
| Chronic myeloid leukemia  | High SDI        | 4.50<br>(4.09 to 5.23) | 4.81<br>(4.29 to 5.63) | 0.7<br>(0.3 to 1.2)  | 0.3<br>(0.3 to 0.3) | 0.3<br>(0.2 to 0.3) | -1.5<br>(-2.0 to -1.0) |

|                           |                 |                        |                        |                       |                     |                     |                        |
|---------------------------|-----------------|------------------------|------------------------|-----------------------|---------------------|---------------------|------------------------|
| Chronic myeloid leukemia  | High-middle SDI | 5.27<br>(4.97 to 5.66) | 4.97<br>(4.55 to 5.51) | -0.6<br>(-1.4 to 0.1) | 0.3<br>(0.3 to 0.4) | 0.3<br>(0.2 to 0.3) | -2.9<br>(-3.6 to -2.2) |
| Chronic myeloid leukemia  | Middle SDI      | 6.01<br>(5.50 to 6.64) | 6.65<br>(5.92 to 7.65) | 1.1<br>(0.0 to 2.2)   | 0.3<br>(0.3 to 0.3) | 0.3<br>(0.2 to 0.3) | -1.3<br>(-2.4 to -0.3) |
| Chronic myeloid leukemia  | Low-middle SDI  | 6.96<br>(5.79 to 8.32) | 7.96<br>(6.62 to 9.75) | 1.5<br>(-0.0 to 2.9)  | 0.6<br>(0.5 to 0.7) | 0.5<br>(0.4 to 0.6) | -0.8<br>(-2.2 to 0.5)  |
| Chronic myeloid leukemia  | Low SDI         | 5.19<br>(3.68 to 7.72) | 5.51<br>(4.07 to 6.95) | 0.7<br>(-2.1 to 3.1)  | 0.9<br>(0.7 to 1.1) | 0.8<br>(0.6 to 1.0) | -1.3<br>(-3.2 to 0.3)  |
| Other leukemia            | Global          | 113<br>(99.0 to 127)   | 118<br>(103 to 132)    | 0.5<br>(-0.4 to 1.5)  | 1.8<br>(1.5 to 2.0) | 1.5<br>(1.3 to 1.7) | -1.8<br>(-2.7 to -0.8) |
| Other leukemia            | High SDI        | 19.3<br>(17.2 to 22.0) | 23.0<br>(19.8 to 26.2) | 1.9<br>(1.4 to 2.3)   | 1.2<br>(1.1 to 1.4) | 1.2<br>(1.0 to 1.3) | -0.6<br>(-1.0 to -0.2) |
| Other leukemia            | High-middle SDI | 27.6<br>(24.0 to 29.5) | 27.8<br>(23.9 to 31.0) | 0.1<br>(-1.0 to 1.2)  | 1.8<br>(1.6 to 2.0) | 1.5<br>(1.3 to 1.7) | -2.2<br>(-3.2 to -1.1) |
| Other leukemia            | Middle SDI      | 41.4<br>(35.5 to 46.6) | 41.7<br>(35.4 to 48.7) | 0.1<br>(-1.2 to 1.4)  | 2.2<br>(1.9 to 2.4) | 1.8<br>(1.5 to 2.1) | -2.2<br>(-3.4 to -0.9) |
| Other leukemia            | Low-middle SDI  | 16.2<br>(12.9 to 19.9) | 16.5<br>(14.1 to 19.7) | 0.2<br>(-1.1 to 1.9)  | 1.4<br>(1.1 to 1.6) | 1.1<br>(1.0 to 1.4) | -1.9<br>(-3.0 to -0.4) |
| Other leukemia            | Low SDI         | 8.75<br>(5.60 to 11.6) | 9.31<br>(6.73 to 11.7) | 0.7<br>(-1.4 to 3.2)  | 1.4<br>(1.0 to 1.8) | 1.2<br>(0.9 to 1.5) | -1.3<br>(-2.7 to 0.3)  |
| Other malignant neoplasms | Global          | 338<br>(300 to 359)    | 408<br>(355 to 444)    | 2.1<br>(1.5 to 2.7)   | 5.3<br>(4.6 to 5.6) | 5.1<br>(4.5 to 5.6) | -0.3<br>(-0.9 to 0.3)  |
| Other malignant neoplasms | High SDI        | 64.8<br>(55.7 to 68.4) | 73.6<br>(63.4 to 78.7) | 1.4<br>(1.1 to 1.7)   | 4.4<br>(3.9 to 4.7) | 4.2<br>(3.7 to 4.4) | -0.6<br>(-0.9 to -0.3) |
| Other malignant neoplasms | High-middle SDI | 76.5<br>(68.4 to 80.6) | 84.9<br>(75.5 to 91.6) | 1.2<br>(0.4 to 1.9)   | 5.0<br>(4.5 to 5.2) | 4.5<br>(4.0 to 4.8) | -1.1<br>(-1.8 to -0.4) |
| Other malignant neoplasms | Middle SDI      | 89.5<br>(77.3 to 95.3) | 111<br>(93.9 to 123)   | 2.4<br>(1.5 to 3.2)   | 4.8<br>(4.1 to 5.1) | 4.7<br>(4.0 to 5.2) | -0.3<br>(-1.2 to 0.6)  |
| Other malignant neoplasms | Low-middle SDI  | 70.0<br>(57.2 to 77.9) | 91.0<br>(73.3 to 105)  | 2.9<br>(1.9 to 3.9)   | 6.2<br>(4.9 to 7.0) | 6.5<br>(5.1 to 7.5) | 0.4<br>(-0.6 to 1.4)   |
| Other malignant neoplasms | Low SDI         | 36.9<br>(32.6 to 41.4) | 47.9<br>(41.5 to 54.5) | 2.9<br>(1.8 to 4.0)   | 7.0<br>(6.0 to 7.8) | 7.1<br>(6.0 to 8.0) | 0.2<br>(-0.6 to 1.1)   |

Abbreviations: 95% UI, 95% uncertainty interval; NMSC, non-melanoma skin cancer; SDI, socio-demographic index.

Footnote: Socio-demographic index (SDI) quintiles do not sum exactly to the global total because several territories are included in the global total but not in any SDI quintile totals. "Total cancers" in this table excludes the "Other neoplasms" category of benign and in situ neoplasms.



eTable 18: Global age-standardized cancer estimates in 2019 and ranking among 22 level 2 categories of diseases and injuries in the Global Burden of Disease Study, overall and by quintile of Socio-demographic Index

|                 | DALYs<br>(Disability-Adjusted Life Years)      |                | Deaths                                         |                | YLLs<br>(Years of Life Lost)                   |                | Incident cases                                 |                | YLDs<br>(Years Lived with Disability)          |                |
|-----------------|------------------------------------------------|----------------|------------------------------------------------|----------------|------------------------------------------------|----------------|------------------------------------------------|----------------|------------------------------------------------|----------------|
|                 | Age-standardized rate,<br>per 100,000 (95% UI) | Cancer<br>rank | Age-standardized rate,<br>per 100,000 (95% UI) | Cancer<br>rank | Age-standardized rate,<br>per 100,000 (95% UI) | Cancer<br>rank | Age-standardized rate,<br>per 100,000 (95% UI) | Cancer<br>rank | Age-standardized rate,<br>per 100,000 (95% UI) | Cancer<br>rank |
| Global          | 3 032.4 (2 843.3 - 3 207.9)                    | 2              | 123.9 (115.7 - 131.2)                          | 2              | 2 938.0 (2 756.6 - 3 109.1)                    | 2              | 211.4 (195.4 - 226.8)                          | 21             | 94.3 (69.4 - 121.7)                            | 20             |
| Low SDI         | 2 648.1 (2 363.1 - 2 951.2)                    | 7              | 100.3 (89.6 - 110.9)                           | 3              | 2 607.0 (2 329.3 - 2 903.7)                    | 5              | 114.1 (102.1 - 126.2)                          | 21             | 41.1 (29.7 - 54.0)                             | 22             |
| Low-middle SDI  | 2 680.4 (2 458.5 - 2 913.5)                    | 4              | 101.7 (93.7 - 110.1)                           | 3              | 2 632.4 (2 414.9 - 2 863.5)                    | 4              | 127.2 (117.3 - 137.8)                          | 21             | 48.0 (35.6 - 62.7)                             | 22             |
| Middle SDI      | 2 979.9 (2 721.8 - 3 240.9)                    | 2              | 120.5 (109.3 - 131.4)                          | 2              | 2 907.0 (2 648.7 - 3 168.8)                    | 2              | 179.3 (162.7 - 196.1)                          | 21             | 72.9 (53.7 - 96.3)                             | 20             |
| High-middle SDI | 3 236.3 (2 988.5 - 3 468.4)                    | 2              | 131.9 (120.7 - 141.7)                          | 2              | 3 128.3 (2 891.9 - 3 359.8)                    | 2              | 238.2 (217.7 - 258.3)                          | 21             | 108.0 (78.9 - 141.0)                           | 18             |
| High SDI        | 2 991.9 (2 853.9 - 3 097.9)                    | 1              | 130.2 (120.8 - 135.3)                          | 1              | 2 829.5 (2 707.2 - 2 914.4)                    | 1              | 316.7 (287.4 - 346.7)                          | 20             | 162.4 (118.1 - 209.9)                          | 14             |

Abbreviations: DALYs, disability-adjusted life years; YLLs, years of life lost; YLDs, years lived with disability; SDI, Socio-demographic Index; UI, 95% uncertainty interval.

Totals and rankings exclude non-melanoma skin cancer. All estimates refer to estimates in 2019. Rank refers to the relative ranking of the total cancer estimate for a given measure (e.g., DALYs) and SDI quintile (e.g., high SDI) compared among the 22 Level 2 categories of diseases and injuries in the Global Burden of Disease Study 2019. More details on SDI quintiles, including population, are in the eAppendix.

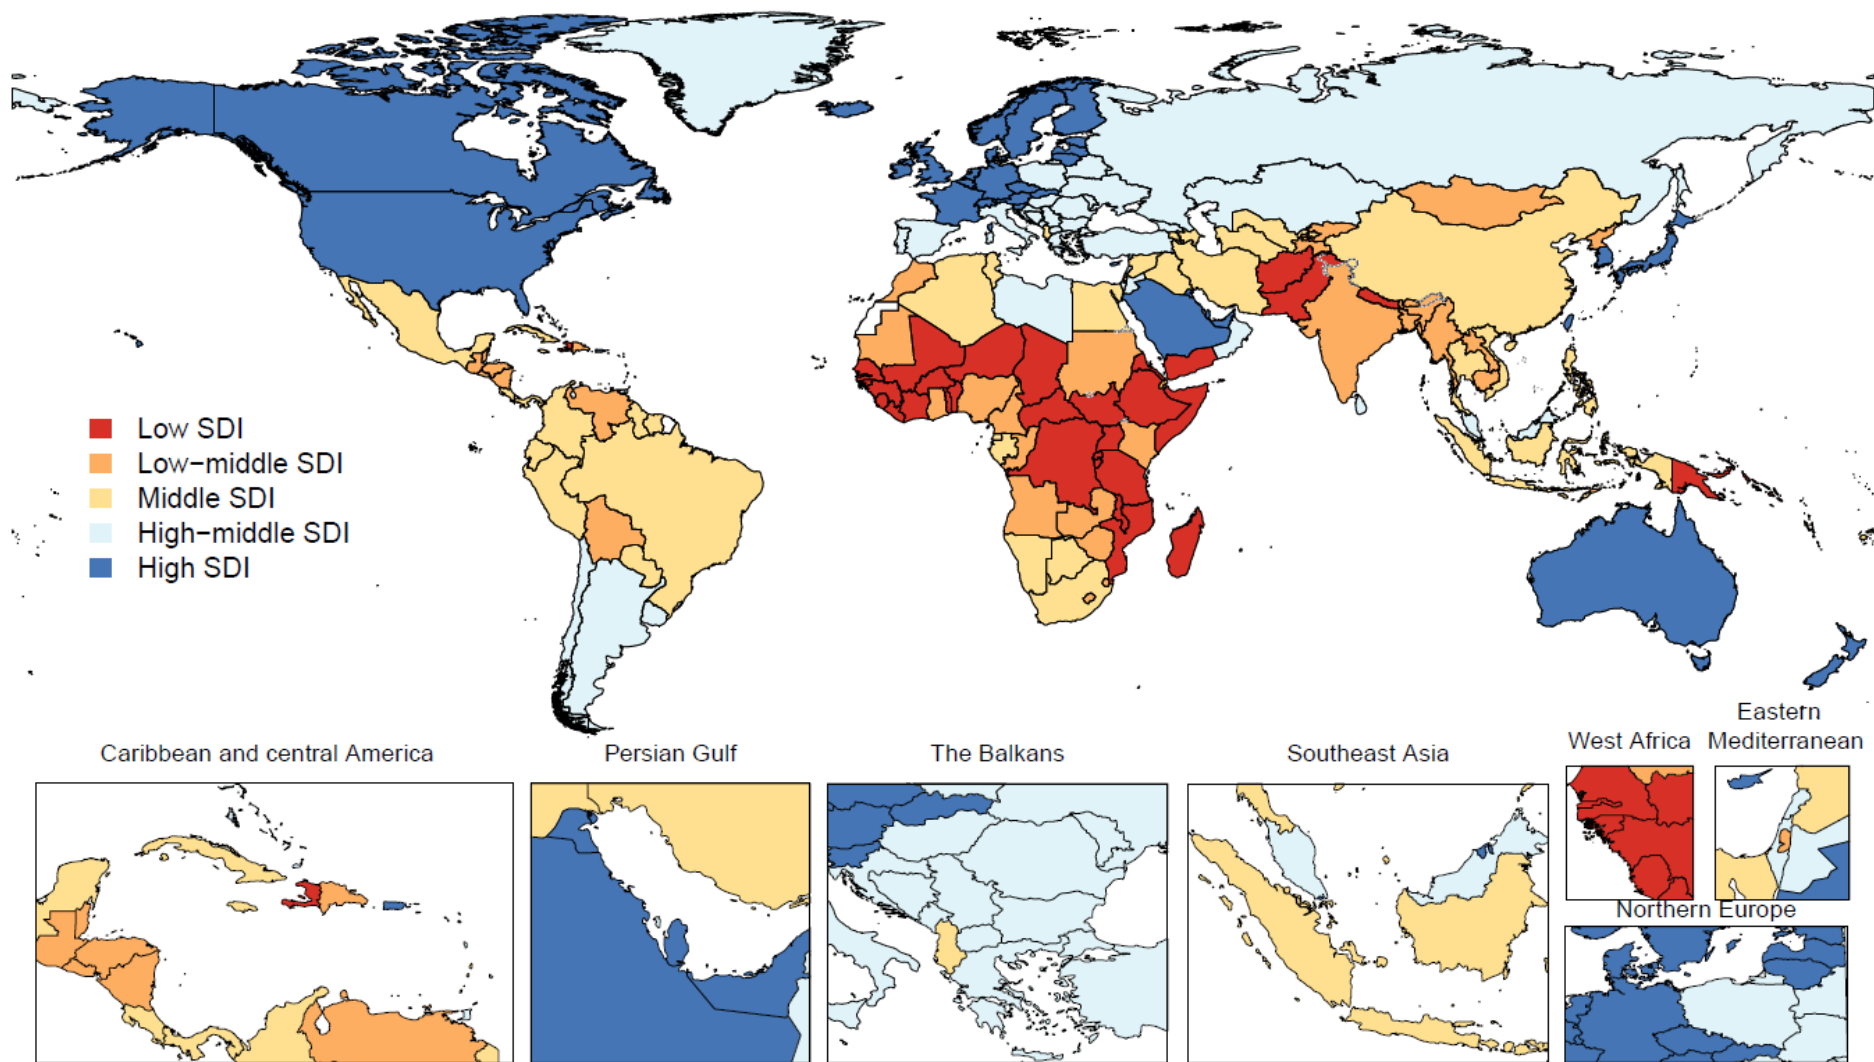

*eFigure 1: Socio-demographic Index quintiles for the Global Burden of Disease Study 2019*

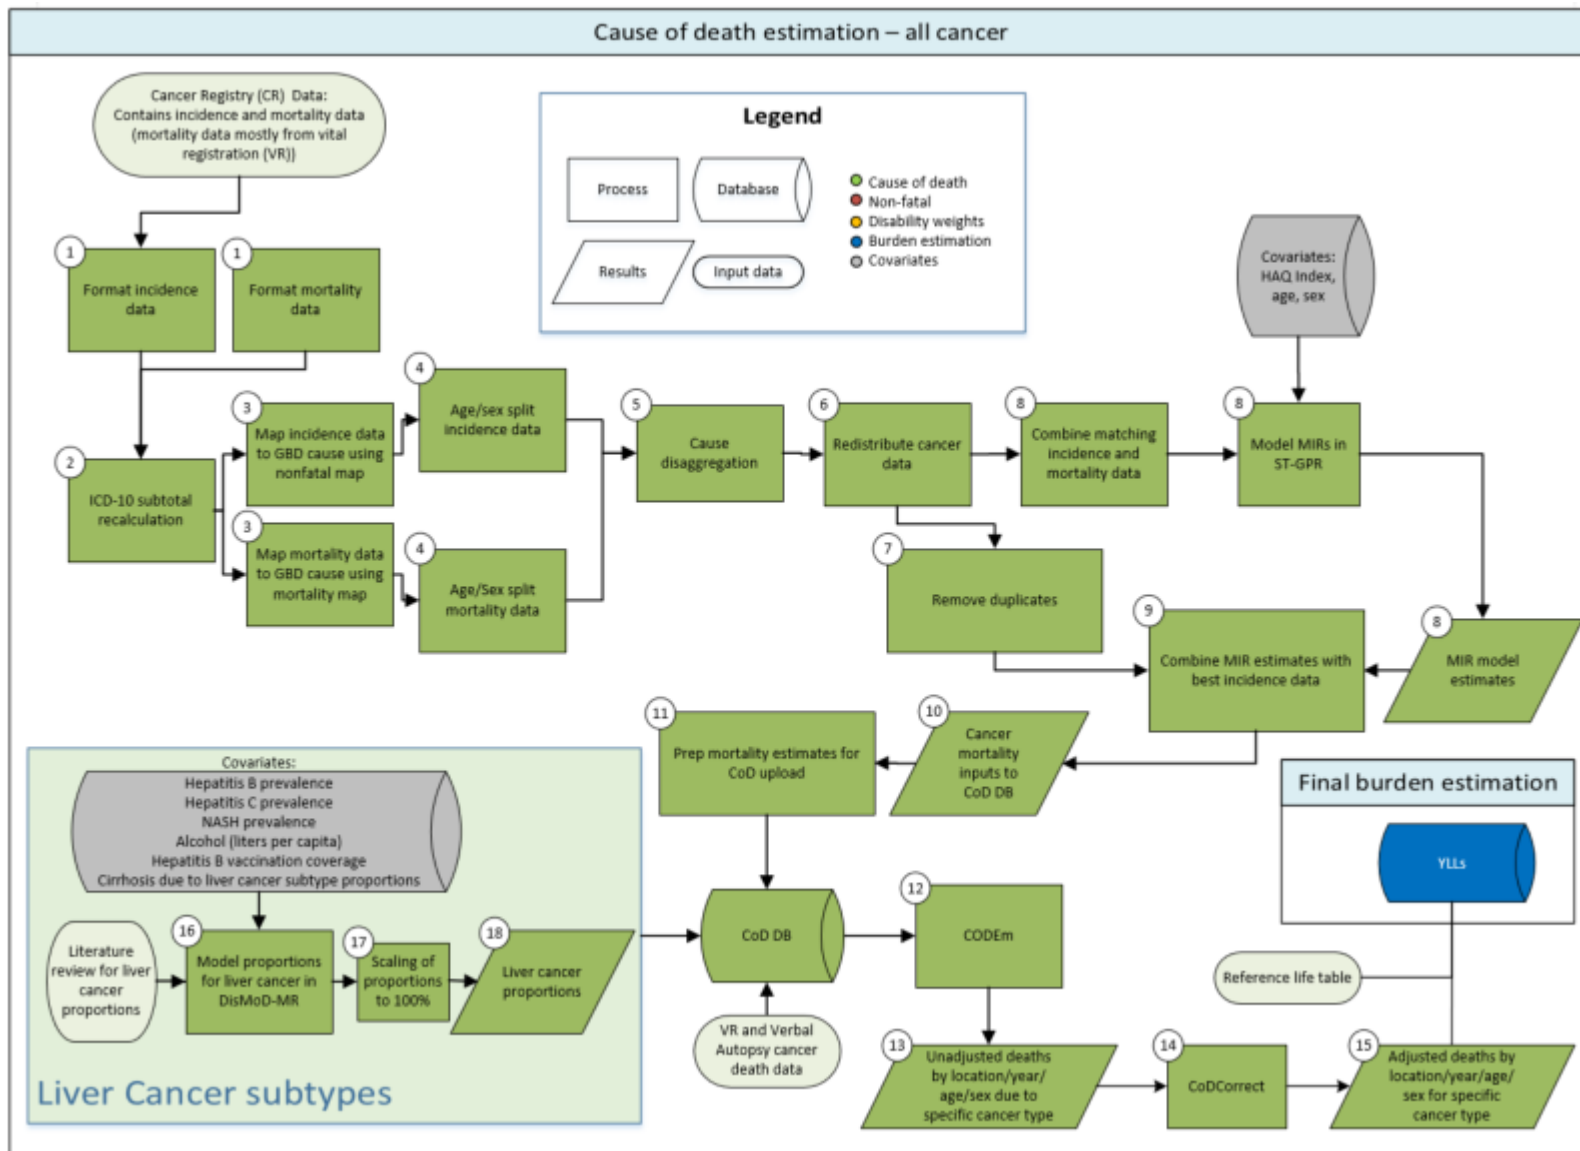

Figure 2: Flowchart GBD cancer mortality, YLL estimation

Abbreviations: COD, causes of death; CODEm, cause of death ensemble model; DB, database; DisMod-MR, disease model - Bayesian meta-regression; HAQ Index, Healthcare Access and Quality Index; ICD, International Classification of Diseases; ST-GPR, spatiotemporal Gaussian process regression; MIR, mortality to incidence ratio; NASH, nonalcoholic steatohepatitis; VR, vital registration; YLL, years of life lost.

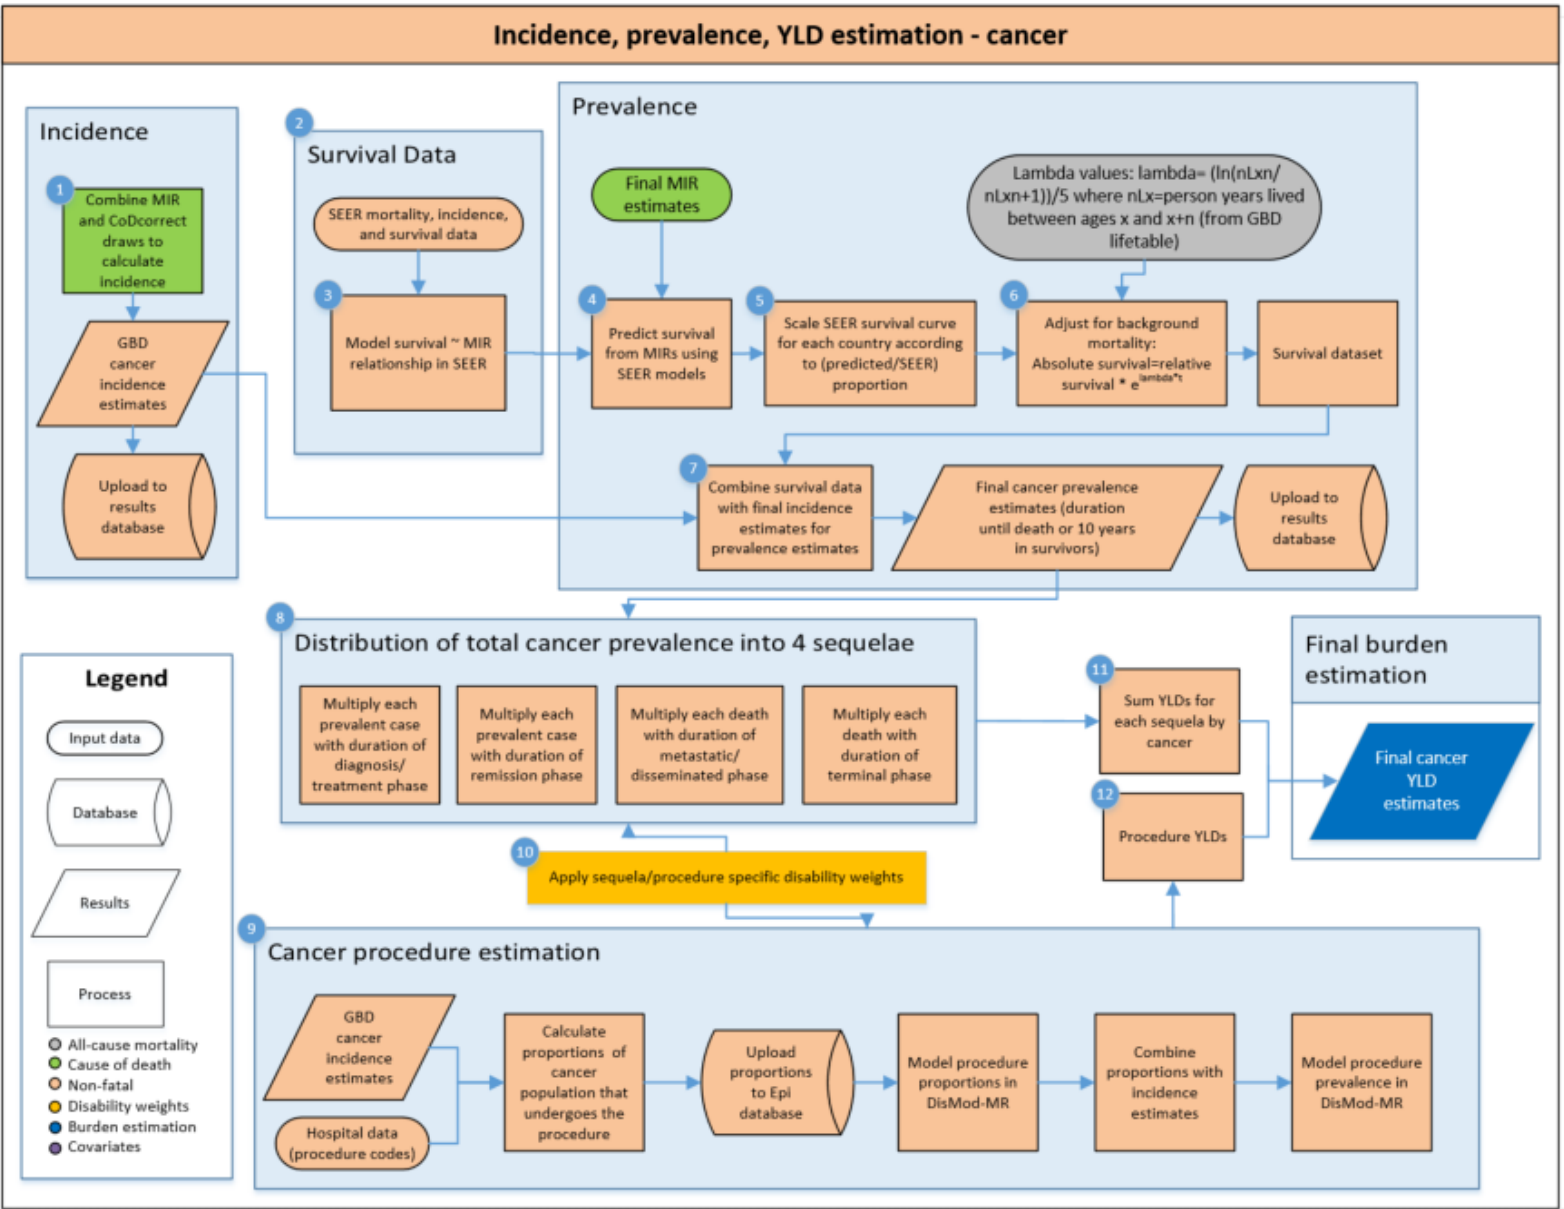

Figure 3: Flowchart GBD cancer incidence, prevalence, YLD estimation

Abbreviations: GBD, Global Burden of Disease Study; MIR, mortality to incidence ratio; SEER, Surveillance, Epidemiology and End Results Program; YLD, years lived with disability.

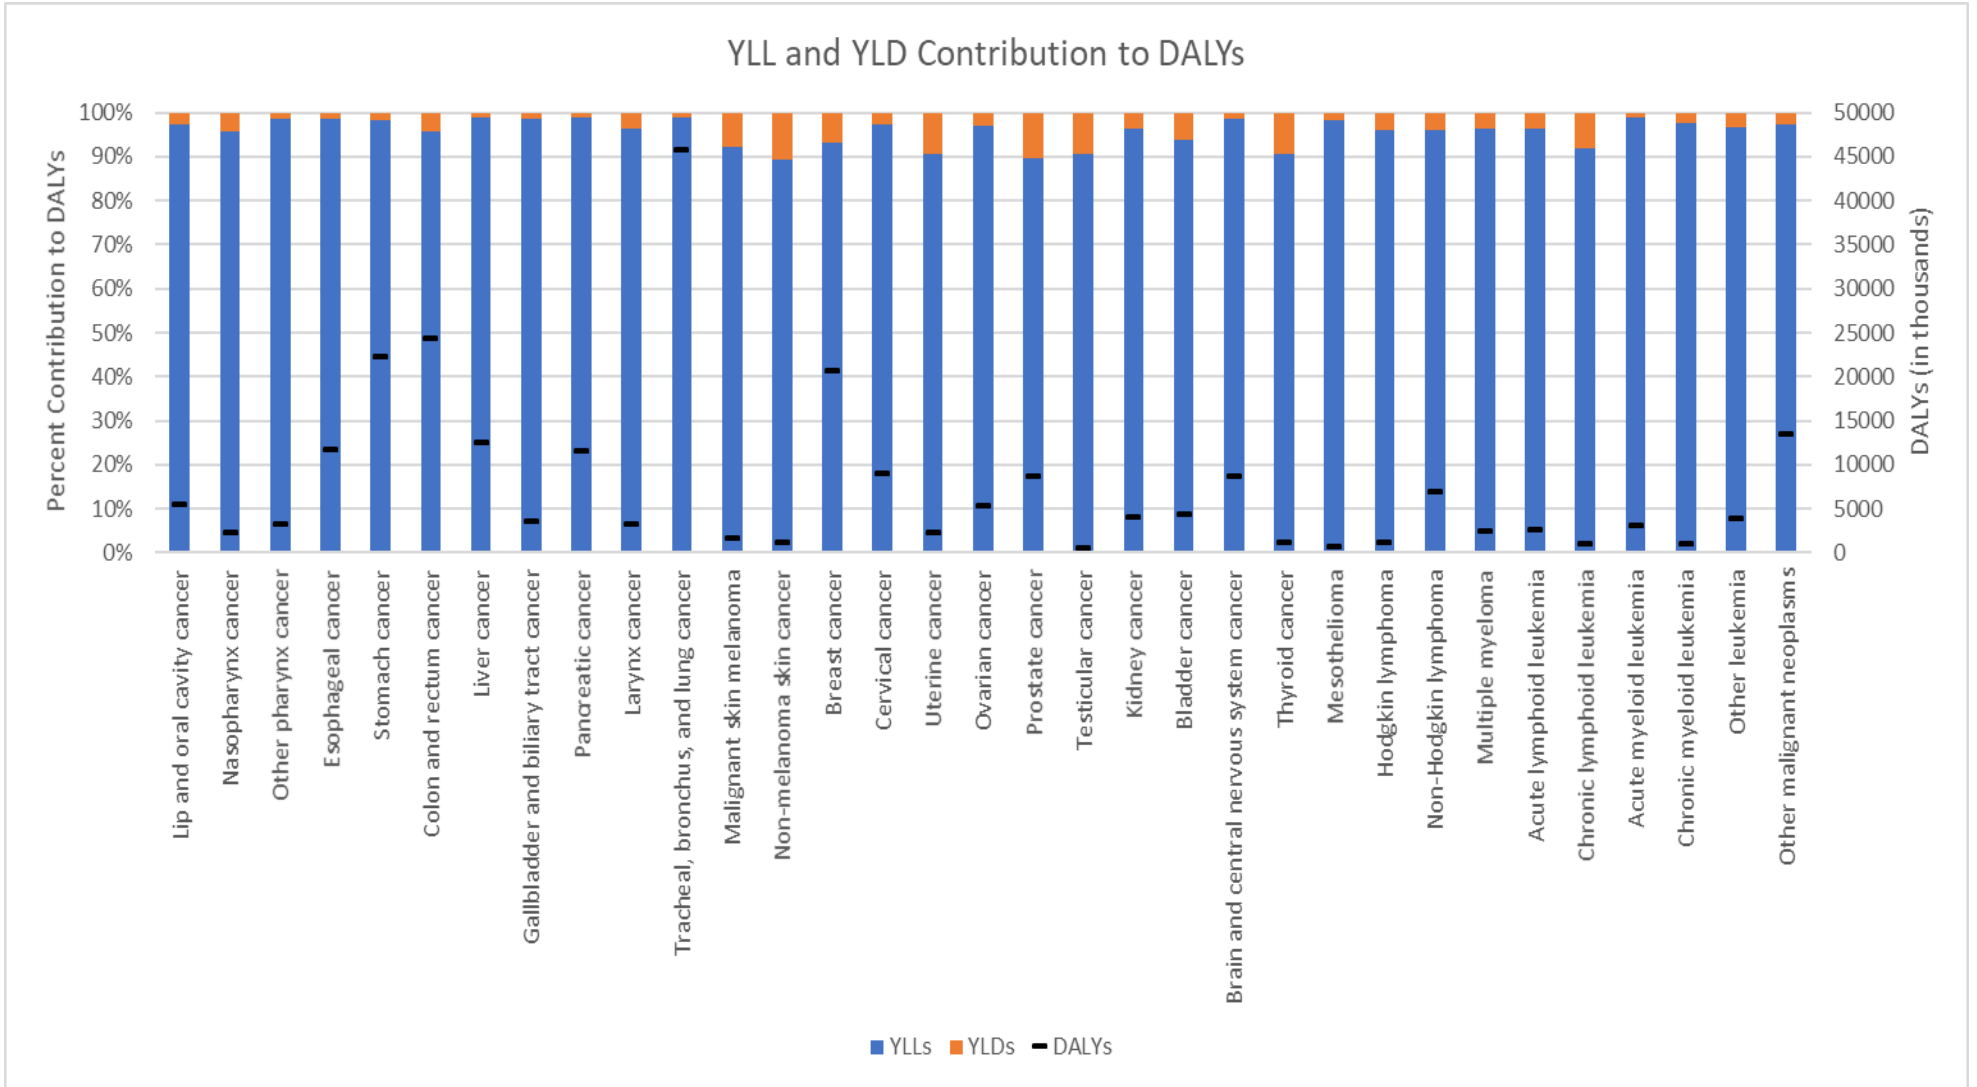

eFigure 4: Contribution of YLDs and YLLs to DALYs by cancer, global, both sexes, 2019

Abbreviations: YLL, years of life lost; YLD, years lived with disability; DALY, disability adjusted life year

Footnote: Black horizontal rectangle provides total DALYs, according to right-side y-axis. Blue shading provides the proportion of the total DALYs that are due to YLLs, according to left-side y-axis, with the orange shading the proportion due to YLDs.

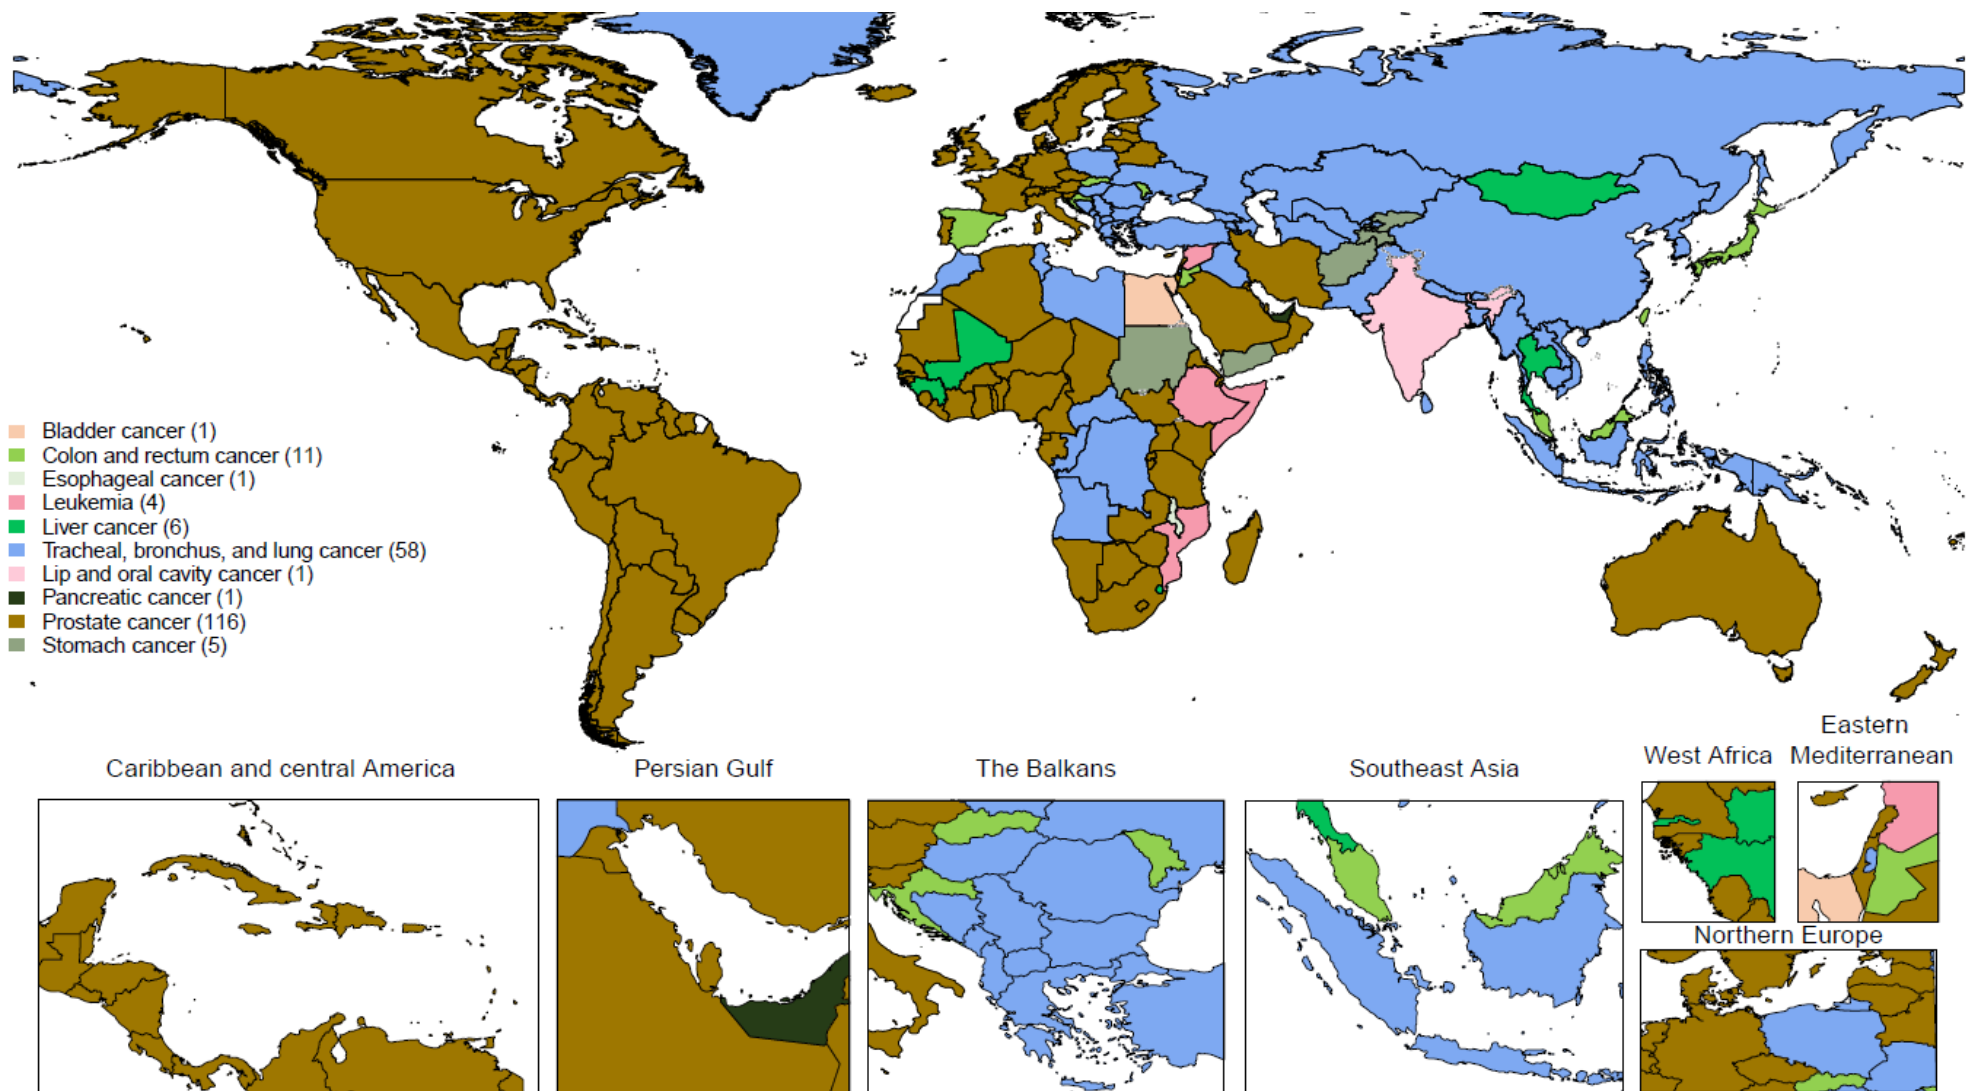

*eFigure 5: Top-ranked cancers by absolute number of incident cases for all ages in males, 2019*  
 Footnote: Number of countries and territories represented is in parentheses.



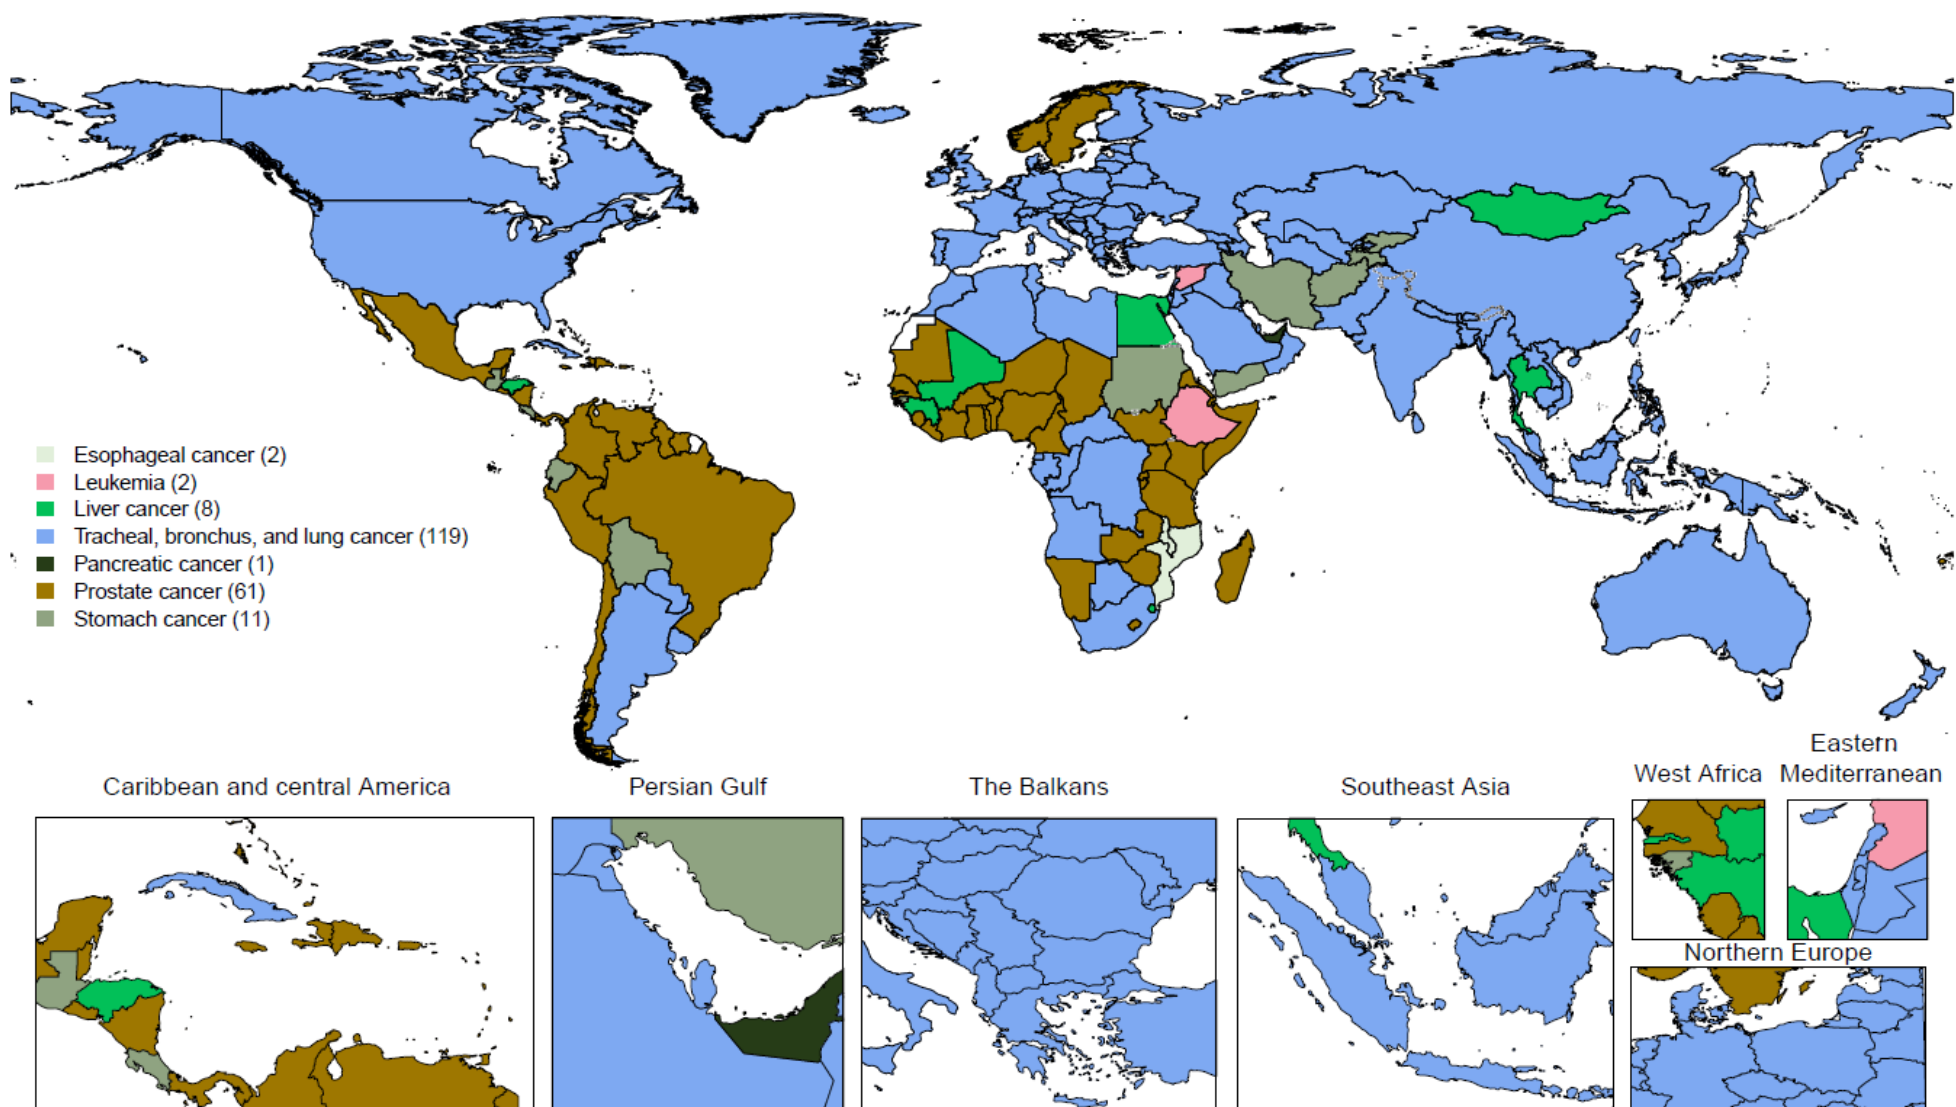

Figure 6: Top-ranked cancers by absolute number of deaths for all ages in males, 2019

Footnote: Number of countries and territories represented is in parentheses.

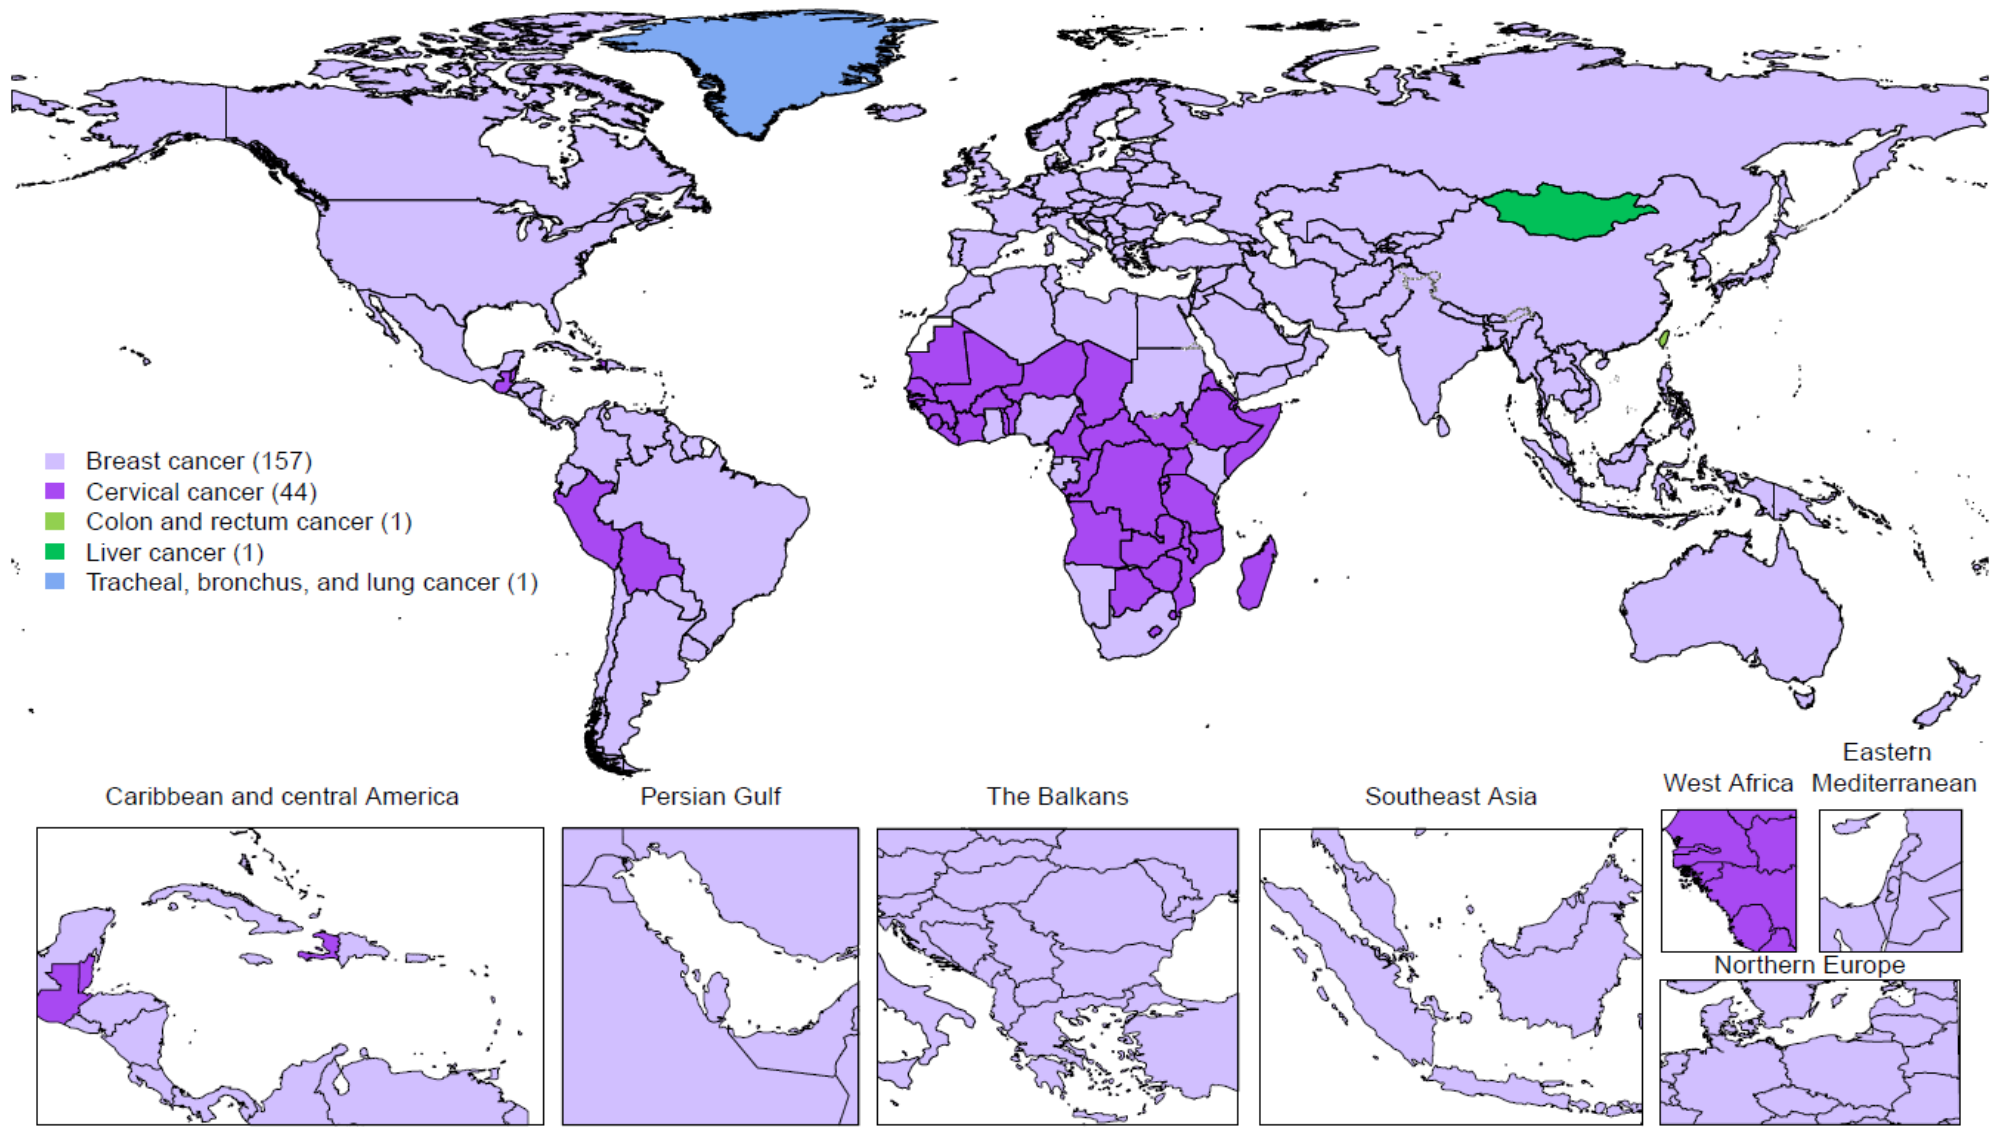

*eFigure 7: Top-ranked cancers by absolute number of incident cases for all ages in females, 2019*

Footnote: Number of countries and territories represented is in parentheses.



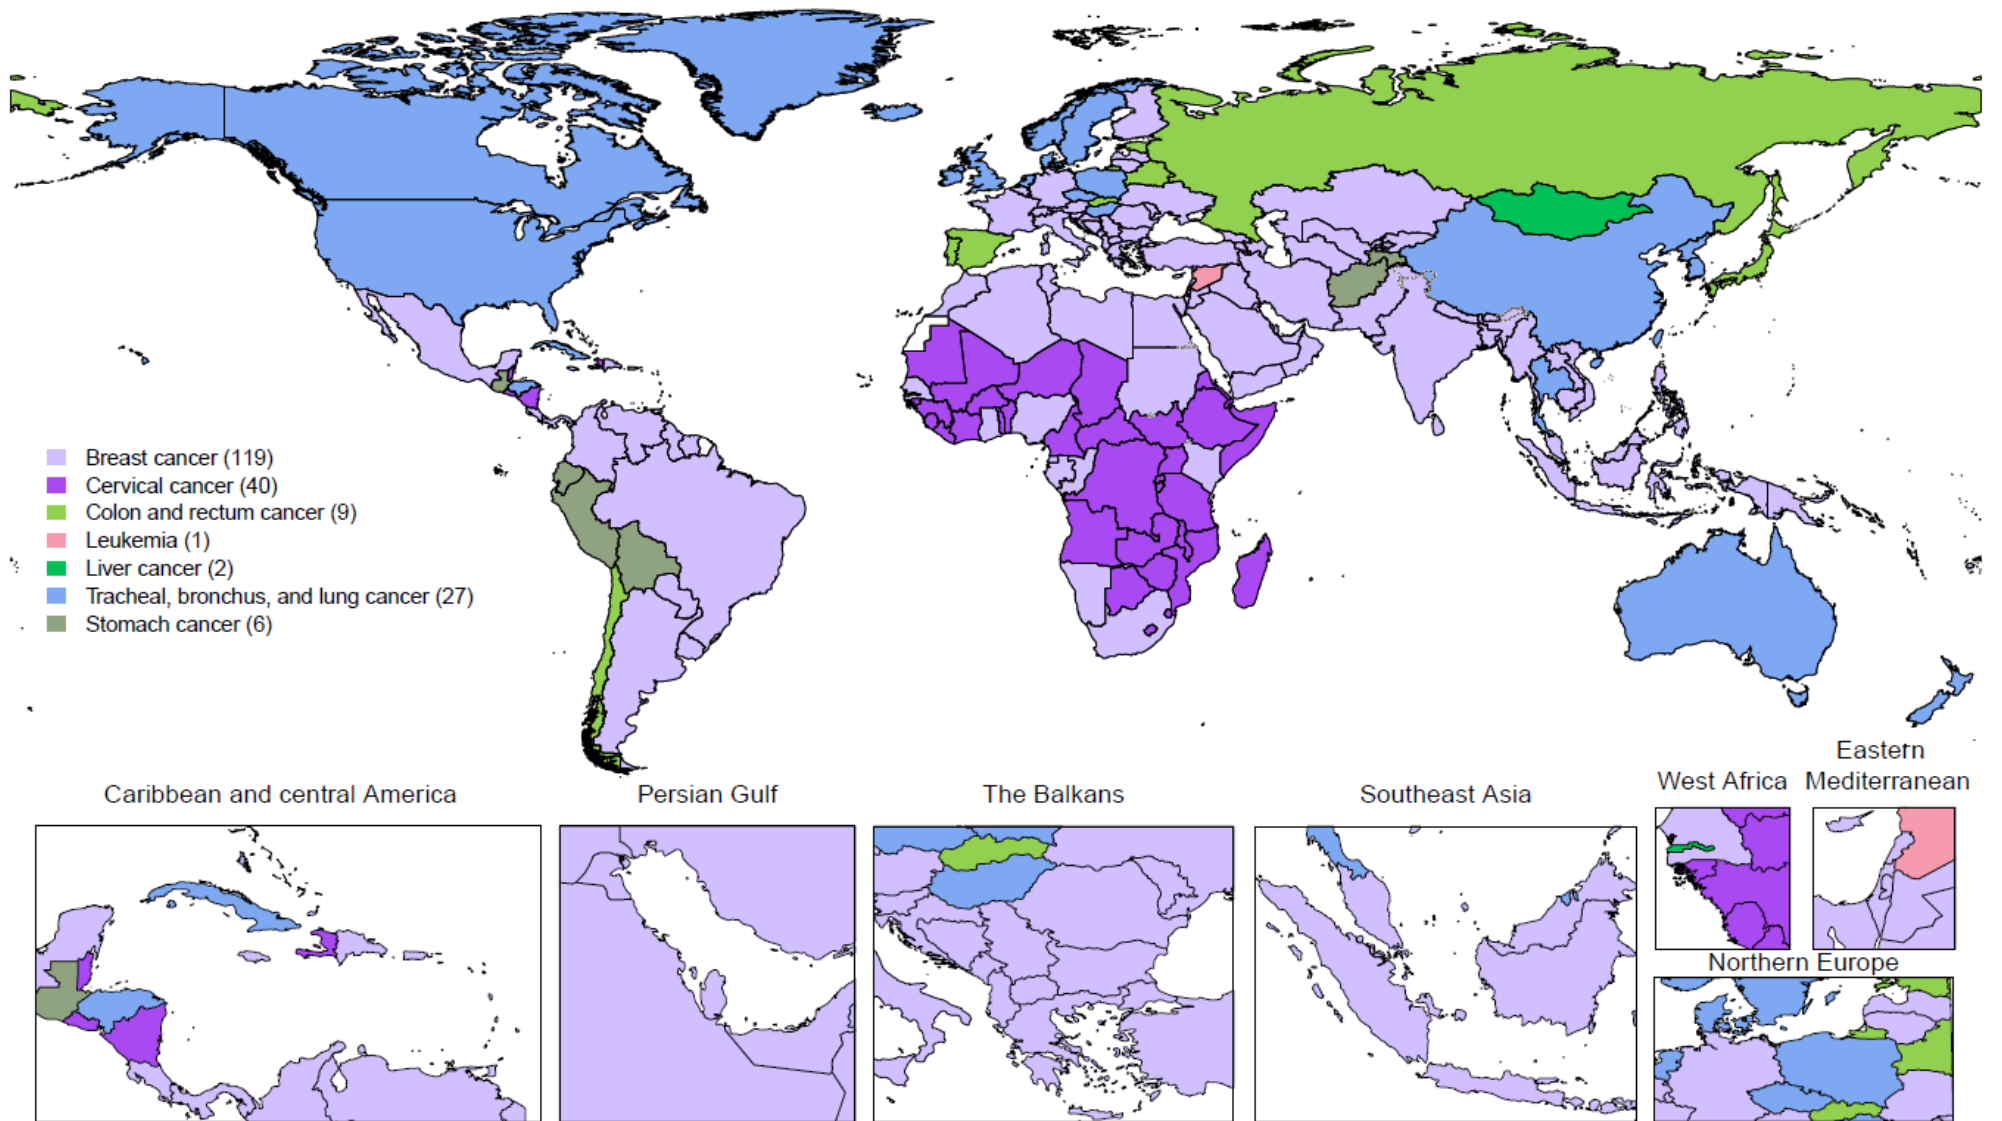

*eFigure 8: Top-ranked cancers by absolute number of deaths for all ages in females, 2019*  
 Footnote: Number of countries and territories represented is in parentheses.

| Rank 2010 | Rank 2019 | Cancer                                  | Absolute DALYs in 2019, millions (95% UI) | Percent change in absolute DALYs, 2010-2019 (95% UI) | Age-standardized DALY rate in 2019, per 100,000 (95% UI) | Percent change in age-standardized DALY rate, 2010-2019 (95% UI) |
|-----------|-----------|-----------------------------------------|-------------------------------------------|------------------------------------------------------|----------------------------------------------------------|------------------------------------------------------------------|
| 1         | 1         | Tracheal, bronchus, and lung cancer     | 31.6 (28.6, 34.7)                         | 15.1 (3.8, 27.7)                                     | 802.9 (727.6, 879.8)                                     | -10.0 (-18.6, -0.4)                                              |
| 2         | 2         | Stomach cancer                          | 14.5 (12.9, 16.2)                         | -1.6 (-13.1, 11.2)                                   | 368.9 (328.2, 410.3)                                     | -21.9 (-30.8, -12.0)                                             |
| 3         | 3         | Colon and rectum cancer                 | 14.0 (12.9, 15.0)                         | 24.0 (14.4, 34.0)                                    | 360.1 (333.1, 387.8)                                     | -2.2 (-9.6, 5.4)                                                 |
| 4         | 4         | Liver cancer                            | 9.05 (8.02, 10.1)                         | 22.2 (8.0, 37.9)                                     | 225.3 (200.4, 250.2)                                     | -1.2 (-12.3, 11.0)                                               |
| 5         | 5         | Esophageal cancer                       | 8.82 (7.63, 10.1)                         | 6.9 (-7.5, 25.8)                                     | 221.4 (191.2, 252.2)                                     | -15.6 (-26.8, -0.9)                                              |
| 6         | 6         | Prostate cancer                         | 8.64 (7.55, 10.6)                         | 26.2 (20.4, 32.8)                                    | 244.1 (211.8, 297.7)                                     | -5.3 (-9.6, -0.6)                                                |
| 7         | 7         | Leukemia                                | 6.67 (5.70, 7.46)                         | 1.9 (-7.4, 12.7)                                     | 175.4 (149.6, 196.5)                                     | -10.8 (-18.6, -1.5)                                              |
| 8         | 8         | Pancreatic cancer                       | 6.48 (5.98, 7.00)                         | 30.7 (20.6, 41.5)                                    | 164.7 (151.9, 177.4)                                     | 2.9 (-4.9, 11.1)                                                 |
| 9         | 9         | Brain and central nervous system cancer | 5.01 (3.66, 5.74)                         | 10.5 (-3.2, 23.7)                                    | 127.6 (92.9, 146.2)                                      | -4.6 (-16.0, 6.4)                                                |
| 10        | 10        | Non-Hodgkin lymphoma                    | 4.22 (3.93, 4.53)                         | 16.6 (8.5, 24.9)                                     | 108.2 (100.9, 116.2)                                     | -3.3 (-9.7, 3.3)                                                 |
| 11        | 11        | Lip and oral cavity cancer              | 3.76 (3.33, 4.18)                         | 18.2 (4.8, 31.9)                                     | 92.8 (82.4, 103.1)                                       | -4.1 (-15.0, 6.7)                                                |
| 12        | 12        | Bladder cancer                          | 3.33 (3.09, 3.57)                         | 22.1 (14.2, 30.2)                                    | 90.2 (83.6, 96.6)                                        | -6.1 (-11.7, -0.2)                                               |
| 13        | 13        | Larynx cancer                           | 2.80 (2.59, 3.03)                         | 13.6 (4.8, 22.3)                                     | 69.3 (64.1, 75.2)                                        | -10.0 (-16.9, -3.2)                                              |
| 14        | 14        | Kidney cancer                           | 2.74 (2.54, 2.93)                         | 22.3 (14.6, 30.5)                                    | 70.1 (65.1, 75.1)                                        | -2.1 (-8.2, 4.4)                                                 |
| 15        | 15        | Other pharynx cancer                    | 2.50 (2.22, 2.82)                         | 25.5 (9.9, 40.5)                                     | 61.2 (54.2, 68.8)                                        | 1.0 (-11.4, 13.1)                                                |
| 16        | 16        | Nasopharynx cancer                      | 1.68 (1.51, 1.86)                         | 13.7 (0.4, 28.3)                                     | 41.1 (37.0, 45.4)                                        | -5.7 (-16.7, 6.2)                                                |
| 17        | 17        | Gallbladder and biliary tract cancer    | 1.58 (1.30, 1.76)                         | 17.2 (6.8, 30.7)                                     | 41.0 (33.7, 45.3)                                        | -8.2 (-16.2, 1.9)                                                |
| 18        | 18        | Multiple myeloma                        | 1.38 (1.15, 1.57)                         | 27.5 (17.9, 35.8)                                    | 35.5 (29.8, 40.0)                                        | -0.4 (-7.6, 5.7)                                                 |
| 19        | 19        | Malignant skin melanoma                 | 0.974 (0.642, 1.21)                       | 13.0 (4.7, 22.3)                                     | 24.8 (16.2, 30.8)                                        | -8.1 (-14.9, -0.3)                                               |
| 20        | 20        | Non-melanoma skin cancer                | 0.743 (0.682, 0.802)                      | 26.9 (18.7, 34.5)                                    | 20.0 (18.4, 21.6)                                        | -0.9 (-7.0, 4.8)                                                 |
| 21        | 21        | Hodgkin lymphoma                        | 0.726 (0.579, 0.894)                      | 0.6 (-6.1, 7.7)                                      | 18.4 (14.7, 22.6)                                        | -11.2 (-17.1, -5.0)                                              |
| 22        | 22        | Testicular cancer                       | 0.562 (0.511, 0.628)                      | 14.7 (6.3, 23.7)                                     | 14.2 (12.9, 16.0)                                        | 4.1 (-3.3, 12.3)                                                 |
| 23        | 23        | Thyroid cancer                          | 0.510 (0.462, 0.553)                      | 21.2 (10.3, 31.4)                                    | 12.9 (11.7, 14.0)                                        | -1.6 (-10.3, 6.6)                                                |
| 24        | 24        | Mesothelioma                            | 0.471 (0.443, 0.510)                      | 14.4 (8.8, 19.8)                                     | 12.2 (11.5, 13.1)                                        | -9.7 (-13.8, -5.7)                                               |
| 25        | 25        | Breast cancer                           | 0.315 (0.279, 0.349)                      | 17.8 (6.7, 29.2)                                     | 8.0 (7.0, 8.8)                                           | -6.5 (-15.0, 2.3)                                                |

eFigure 9: Cancers ranked by disability-adjusted life years (DALYs) for males between 2010 and 2019

Abbreviations: DALY, disability-adjusted life year; UI, 95% uncertainty interval

Footnote: Rankings are by absolute DALYs, and exclude the “Other malignant neoplasms” cancer group. Cancers are ordered by rank in 2019, with lines connecting to rank in 2010. Absolute DALYs and age-standardized DALY rates for 2010 can be found online at <https://vizhub.healthdata.org/gbd-compare/>. Colors refer to the directional change in cancer rank from 2010 to 2019: red signifies an increase in rank; blue signifies no change in rank; and green signifies a decrease in rank.

| Rank 2010 | Rank 2019 | Cancer                                  | Absolute DALYs in 2019, millions (95% UI) | Percent change in absolute DALYs, 2010-2019 (95% UI) | Age-standardized DALY rate in 2019, per 100,000 (95% UI) | Percent change in age-standardized DALY rate, 2010-2019 (95% UI) |
|-----------|-----------|-----------------------------------------|-------------------------------------------|------------------------------------------------------|----------------------------------------------------------|------------------------------------------------------------------|
| 1         | 1         | Breast cancer                           | 20.3 (18.7, 21.9)                         | 21.3 (13.1, 29.6)                                    | 473.8 (437.3, 510.5)                                     | -1.0 (-7.6, 5.8)                                                 |
| 2         | 2         | Tracheal, bronchus, and lung cancer     | 14.3 (13.0, 15.7)                         | 25.5 (14.5, 37.0)                                    | 327.6 (298.5, 360.4)                                     | -1.3 (-10.0, 7.7)                                                |
| 3         | 3         | Colon and rectum cancer                 | 10.3 (9.49, 11.1)                         | 22.1 (14.0, 30.6)                                    | 237.9 (218.7, 257.1)                                     | -3.5 (-9.9, 3.2)                                                 |
| 4         | 4         | Cervical cancer                         | 8.96 (7.55, 9.98)                         | 14.6 (5.0, 25.0)                                     | 210.6 (177.7, 234.9)                                     | -4.8 (-12.8, 3.7)                                                |
| 5         | 5         | Stomach cancer                          | 7.70 (6.93, 8.50)                         | 1.7 (-8.1, 12.5)                                     | 178.2 (160.5, 196.9)                                     | -18.7 (-26.6, -10.1)                                             |
| 6         | 6         | Ovarian cancer                          | 5.36 (4.69, 5.95)                         | 27.5 (16.3, 37.7)                                    | 124.7 (109.1, 138.7)                                     | 2.9 (-6.2, 11.1)                                                 |
| 7         | 7         | Pancreatic cancer                       | 5.06 (4.63, 5.46)                         | 35.7 (26.5, 44.4)                                    | 116.0 (106.0, 125.1)                                     | 5.9 (-1.3, 12.7)                                                 |
| 8         | 8         | Leukemia                                | 4.99 (4.52, 5.44)                         | -0.6 (-9.9, 10.0)                                    | 127.2 (115.0, 138.9)                                     | -13.4 (-21.9, -4.3)                                              |
| 9         | 9         | Brain and central nervous system cancer | 3.65 (2.70, 4.10)                         | 13.2 (-2.8, 26.9)                                    | 90.9 (67.8, 102.0)                                       | -3.1 (-17.1, 8.9)                                                |
| 10        | 10        | Liver cancer                            | 3.48 (3.11, 3.87)                         | 17.7 (5.8, 31.0)                                     | 81.3 (72.7, 90.3)                                        | -5.6 (-15.3, 5.0)                                                |
| 11        | 11        | Esophageal cancer                       | 2.84 (2.43, 3.20)                         | 3.5 (-8.8, 21.5)                                     | 65.3 (55.8, 73.3)                                        | -18.7 (-28.3, -4.0)                                              |
| 12        | 12        | Non-Hodgkin lymphoma                    | 2.77 (2.56, 2.98)                         | 20.7 (13.3, 28.6)                                    | 66.1 (61.1, 71.2)                                        | -0.7 (-6.8, 5.7)                                                 |
| 13        | 13        | Uterine cancer                          | 2.33 (2.09, 2.56)                         | 11.6 (3.5, 26.1)                                     | 53.5 (48.1, 58.8)                                        | -11.7 (-18.2, -0.7)                                              |
| 14        | 14        | Gallbladder and biliary tract cancer    | 2.04 (1.69, 2.35)                         | 17.6 (7.8, 29.7)                                     | 46.8 (38.7, 54.0)                                        | -8.0 (-15.6, 1.5)                                                |
| 15        | 15        | Lip and oral cavity cancer              | 1.75 (1.56, 1.95)                         | 31.9 (18.0, 46.6)                                    | 40.8 (36.5, 45.6)                                        | 6.7 (-4.4, 18.7)                                                 |
| 16        | 16        | Kidney cancer                           | 1.32 (1.23, 1.41)                         | 18.7 (12.4, 25.0)                                    | 31.1 (29.0, 33.4)                                        | -4.7 (-9.8, 0.4)                                                 |
| 17        | 17        | Multiple myeloma                        | 1.12 (0.968, 1.24)                        | 24.7 (16.3, 32.1)                                    | 25.7 (22.1, 28.5)                                        | -2.6 (-9.3, 3.2)                                                 |
| 18        | 18        | Bladder cancer                          | 1.07 (0.963, 1.15)                        | 20.2 (11.7, 29.7)                                    | 24.4 (22.1, 26.4)                                        | -6.5 (-13.1, 0.8)                                                |
| 19        | 19        | Malignant skin melanoma                 | 0.734 (0.525, 0.882)                      | 11.0 (2.4, 18.0)                                     | 17.3 (12.4, 20.8)                                        | -9.1 (-16.1, -3.4)                                               |
| 20        | 20        | Other pharynx cancer                    | 0.731 (0.627, 0.857)                      | 29.7 (9.8, 51.8)                                     | 17.0 (14.6, 19.9)                                        | 5.0 (-11.0, 22.7)                                                |
| 21        | 21        | Thyroid cancer                          | 0.722 (0.628, 0.792)                      | 15.5 (7.6, 23.6)                                     | 16.9 (14.7, 18.6)                                        | -5.9 (-12.5, 0.5)                                                |
| 22        | 22        | Nasopharynx cancer                      | 0.651 (0.580, 0.726)                      | 10.3 (-1.8, 23.3)                                    | 15.4 (13.7, 17.2)                                        | -8.2 (-18.4, 2.6)                                                |
| 23        | 23        | Larynx cancer                           | 0.464 (0.421, 0.512)                      | 18.6 (8.4, 30.2)                                     | 10.7 (9.7, 11.8)                                         | -5.2 (-13.3, 4.0)                                                |
| 24        | 24        | Non-melanoma skin cancer                | 0.441 (0.387, 0.486)                      | 20.2 (8.7, 32.2)                                     | 10.2 (8.9, 11.2)                                         | -5.7 (-14.6, 3.5)                                                |
| 25        | 25        | Hodgkin lymphoma                        | 0.420 (0.329, 0.508)                      | 5.3 (-2.1, 14.2)                                     | 10.5 (8.2, 12.7)                                         | -6.5 (-13.3, 1.4)                                                |
| 26        | 26        | Mesothelioma                            | 0.197 (0.144, 0.225)                      | 15.6 (5.2, 27.5)                                     | 4.6 (3.4, 5.3)                                           | -6.4 (-14.8, 3.5)                                                |

eFigure 10: Cancers ranked by disability-adjusted life years (DALYs) for females between 2010 and 2019

Abbreviations: DALY, disability-adjusted life year; UI, 95% uncertainty interval

Footnote: Rankings are by absolute DALYs, and exclude the “Other malignant neoplasms” cancer group. Cancers are ordered by rank in 2019, with lines connecting to rank in 2010. Absolute DALYs and age-standardized DALY rates for 2010 can be found online at <https://vizhub.healthdata.org/gbd-compare/>. Colors refer to the directional change in cancer rank from 2010 to 2019: red signifies an increase in rank; blue signifies no change in rank; and green signifies a decrease in rank.

| Location/grouping:<br><i>Global,</i><br>SDI quintile,<br><i>Super Region,</i><br>Region,<br>Country or Territory | Tracheal, bronchus, and lung cancer | Colon and rectum cancer | Stomach cancer | Breast cancer | Pancreatic cancer | Esophageal cancer | Prostate cancer | Liver cancer | Other malignant neoplasms | Leukemia | Cervical cancer | Non-Hodgkin lymphoma | Brain and central nervous system cancer | Bladder cancer | Lip and oral cavity cancer | Ovarian cancer | Gallbladder and biliary tract cancer | Kidney cancer | Larynx cancer | Other pharynx cancer | Multiple myeloma | Uterine cancer | Nasopharynx cancer | Malignant skin melanoma | Non-melanoma skin cancer | Thyroid cancer | Mesothelioma | Hodgkin lymphoma | Testicular cancer |
|------------------------------------------------------------------------------------------------------------------|-------------------------------------|-------------------------|----------------|---------------|-------------------|-------------------|-----------------|--------------|---------------------------|----------|-----------------|----------------------|-----------------------------------------|----------------|----------------------------|----------------|--------------------------------------|---------------|---------------|----------------------|------------------|----------------|--------------------|-------------------------|--------------------------|----------------|--------------|------------------|-------------------|
| <b>Global</b>                                                                                                    | 1                                   | 2                       | 3              | 4             | 5                 | 6                 | 7               | 8            | 9                         | 10       | 11              | 12                   | 13                                      | 14             | 15                         | 16             | 17                                   | 18            | 19            | 20                   | 21               | 22             | 23                 | 24                      | 25                       | 26             | 27           | 28               | 29                |
| High SDI                                                                                                         | 1                                   | 2                       | 6              | 4             | 3                 | 10                | 5               | 7            | 12                        | 8        | 21              | 9                    | 15                                      | 11             | 19                         | 14             | 16                                   | 13            | 24            | 22                   | 17               | 20             | 27                 | 18                      | 25                       | 26             | 23           | 28               | 29                |
| High-middle SDI                                                                                                  | 1                                   | 2                       | 3              | 4             | 5                 | 6                 | 7               | 8            | 9                         | 10       | 16              | 13                   | 12                                      | 11             | 18                         | 15             | 17                                   | 14            | 19            | 22                   | 20               | 21             | 24                 | 23                      | 25                       | 26             | 27           | 28               | 29                |
| Middle SDI                                                                                                       | 1                                   | 3                       | 2              | 6             | 7                 | 5                 | 8               | 4            | 9                         | 10       | 11              | 13                   | 12                                      | 16             | 14                         | 15             | 17                                   | 19            | 18            | 21                   | 22               | 23             | 20                 | 26                      | 24                       | 25             | 28           | 27               | 29                |
| Low-middle SDI                                                                                                   | 1                                   | 4                       | 2              | 3             | 12                | 8                 | 7               | 10           | 5                         | 11       | 6               | 14                   | 15                                      | 19             | 9                          | 17             | 18                                   | 21            | 16            | 13                   | 23               | 22             | 20                 | 27                      | 25                       | 24             | 28           | 26               | 29                |
| Low SDI                                                                                                          | 3                                   | 7                       | 5              | 1             | 14                | 9                 | 6               | 10           | 2                         | 8        | 4               | 12                   | 13                                      | 15             | 11                         | 16             | 19                                   | 22            | 17            | 18                   | 23               | 21             | 20                 | 26                      | 27                       | 25             | 29           | 24               | 28                |
| <b>Central Europe, Eastern Europe, and Central Asia</b>                                                          | 1                                   | 2                       | 3              | 4             | 5                 | 14                | 6               | 13           | 7                         | 10       | 15              | 17                   | 9                                       | 11             | 16                         | 12             | 20                                   | 8             | 19            | 22                   | 23               | 18             | 27                 | 21                      | 24                       | 25             | 28           | 26               | 29                |
| <b>Central Asia</b>                                                                                              | 1                                   | 4                       | 2              | 3             | 7                 | 6                 | 12              | 5            | 8                         | 11       | 10              | 16                   | 9                                       | 15             | 17                         | 14             | 20                                   | 13            | 19            | 21                   | 22               | 18             | 26                 | 23                      | 24                       | 27             | 29           | 25               | 28                |
| Armenia                                                                                                          | 1                                   | 2                       | 4              | 3             | 5                 | 17                | 7               | 6            | 10                        | 12       | 11              | 18                   | 8                                       | 9              | 20                         | 13             | 19                                   | 14            | 15            | 26                   | 22               | 16             | 27                 | 25                      | 21                       | 24             | 23           | 28               | 29                |
| Azerbaijan                                                                                                       | 1                                   | 3                       | 2              | 4             | 6                 | 5                 | 9               | 11           | 10                        | 8        | 13              | 17                   | 7                                       | 15             | 20                         | 16             | 19                                   | 12            | 14            | 26                   | 22               | 18             | 27                 | 25                      | 23                       | 24             | 29           | 21               | 28                |
| Georgia                                                                                                          | 1                                   | 4                       | 3              | 2             | 6                 | 19                | 5               | 12           | 7                         | 10       | 11              | 17                   | 9                                       | 8              | 18                         | 13             | 21                                   | 16            | 14            | 23                   | 25               | 15             | 29                 | 20                      | 22                       | 27             | 28           | 24               | 26                |
| Kazakhstan                                                                                                       | 1                                   | 3                       | 2              | 4             | 6                 | 5                 | 12              | 7            | 8                         | 11       | 9               | 19                   | 14                                      | 16             | 15                         | 10             | 20                                   | 13            | 18            | 22                   | 23               | 17             | 27                 | 21                      | 24                       | 25             | 28           | 26               | 29                |
| Kyrgyzstan                                                                                                       | 2                                   | 3                       | 1              | 4             | 6                 | 8                 | 13              | 12           | 7                         | 9        | 5               | 17                   | 10                                      | 18             | 15                         | 11             | 19                                   | 14            | 21            | 22                   | 24               | 16             | 25                 | 23                      | 20                       | 26             | 29           | 27               | 28                |
| Mongolia                                                                                                         | 3                                   | 5                       | 2              | 8             | 9                 | 4                 | 17              | 1            | 7                         | 11       | 6               | 13                   | 10                                      | 20             | 16                         | 14             | 12                                   | 15            | 18            | 23                   | 21               | 19             | 24                 | 28                      | 25                       | 22             | 27           | 26               | 29                |
| Tajikistan                                                                                                       | 2                                   | 4                       | 1              | 3             | 9                 | 6                 | 11              | 10           | 7                         | 8        | 12              | 13                   | 5                                       | 17             | 19                         | 15             | 23                                   | 14            | 18            | 21                   | 20               | 16             | 22                 | 25                      | 24                       | 28             | 27           | 26               | 29                |
| Turkmenistan                                                                                                     | 1                                   | 5                       | 3              | 4             | 12                | 2                 | 13              | 7            | 6                         | 11       | 9               | 16                   | 8                                       | 17             | 14                         | 15             | 21                                   | 10            | 19            | 18                   | 20               | 24             | 27                 | 25                      | 23                       | 28             | 29           | 22               | 26                |
| Uzbekistan                                                                                                       | 2                                   | 4                       | 1              | 3             | 11                | 7                 | 16              | 6            | 8                         | 10       | 9               | 12                   | 5                                       | 19             | 13                         | 14             | 24                                   | 15            | 17            | 20                   | 23               | 18             | 21                 | 26                      | 25                       | 28             | 29           | 22               | 27                |
| <b>Central Europe</b>                                                                                            | 1                                   | 2                       | 5              | 3             | 4                 | 17                | 6               | 13           | 8                         | 11       | 14              | 15                   | 9                                       | 7              | 18                         | 12             | 16                                   | 10            | 19            | 23                   | 22               | 20             | 26                 | 21                      | 24                       | 25             | 28           | 27               | 29                |
| Albania                                                                                                          | 1                                   | 4                       | 2              | 8             | 7                 | 15                | 3               | 5            | 6                         | 10       | 13              | 14                   | 9                                       | 19             | 17                         | 16             | 18                                   | 11            | 12            | 24                   | 22               | 20             | 26                 | 23                      | 21                       | 25             | 29           | 27               | 28                |
| Bosnia and Herzegovina                                                                                           | 1                                   | 2                       | 4              | 3             | 5                 | 18                | 7               | 6            | 10                        | 12       | 15              | 17                   | 8                                       | 9              | 20                         | 11             | 14                                   | 13            | 16            | 24                   | 22               | 19             | 28                 | 21                      | 23                       | 26             | 29           | 25               | 27                |

|                                  |   |   |    |   |   |    |    |    |    |    |    |    |    |    |    |    |    |    |    |    |    |    |    |    |    |    |    |    |    |
|----------------------------------|---|---|----|---|---|----|----|----|----|----|----|----|----|----|----|----|----|----|----|----|----|----|----|----|----|----|----|----|----|
| Bulgaria                         | 1 | 2 | 5  | 3 | 4 | 19 | 6  | 9  | 10 | 11 | 13 | 17 | 7  | 8  | 18 | 12 | 20 | 14 | 15 | 23 | 24 | 16 | 27 | 21 | 22 | 25 | 29 | 26 | 28 |
| Croatia                          | 1 | 2 | 5  | 3 | 6 | 16 | 4  | 14 | 11 | 9  | 22 | 12 | 7  | 8  | 21 | 13 | 15 | 10 | 19 | 23 | 18 | 20 | 28 | 17 | 24 | 26 | 25 | 27 | 29 |
| Czechia                          | 1 | 2 | 7  | 4 | 3 | 16 | 5  | 15 | 10 | 8  | 19 | 14 | 13 | 9  | 21 | 12 | 11 | 6  | 23 | 22 | 17 | 18 | 28 | 20 | 24 | 25 | 27 | 26 | 29 |
| Hungary                          | 1 | 2 | 5  | 4 | 3 | 15 | 6  | 18 | 10 | 8  | 20 | 16 | 14 | 7  | 12 | 11 | 13 | 9  | 19 | 17 | 23 | 22 | 26 | 21 | 24 | 25 | 29 | 28 | 27 |
| Montenegro                       | 1 | 2 | 6  | 3 | 4 | 15 | 5  | 8  | 14 | 11 | 16 | 17 | 7  | 10 | 18 | 13 | 20 | 12 | 9  | 23 | 22 | 19 | 29 | 21 | 26 | 25 | 28 | 24 | 27 |
| North Macedonia                  | 1 | 2 | 3  | 4 | 5 | 20 | 6  | 7  | 9  | 11 | 14 | 19 | 8  | 10 | 21 | 13 | 18 | 17 | 12 | 24 | 23 | 16 | 28 | 15 | 22 | 26 | 29 | 25 | 27 |
| Poland                           | 1 | 2 | 5  | 3 | 4 | 14 | 6  | 22 | 11 | 9  | 16 | 15 | 12 | 7  | 17 | 10 | 13 | 8  | 18 | 23 | 20 | 19 | 28 | 21 | 24 | 25 | 26 | 27 | 29 |
| Romania                          | 1 | 2 | 3  | 4 | 5 | 18 | 6  | 15 | 7  | 11 | 8  | 19 | 10 | 9  | 13 | 12 | 21 | 14 | 16 | 17 | 24 | 20 | 25 | 23 | 22 | 26 | 29 | 27 | 28 |
| Serbia                           | 1 | 2 | 6  | 3 | 4 | 19 | 5  | 9  | 10 | 11 | 13 | 15 | 7  | 8  | 18 | 12 | 17 | 14 | 16 | 23 | 22 | 20 | 27 | 21 | 24 | 25 | 29 | 26 | 28 |
| Slovakia                         | 1 | 2 | 5  | 3 | 4 | 18 | 6  | 15 | 8  | 11 | 20 | 12 | 10 | 9  | 17 | 14 | 13 | 7  | 23 | 16 | 21 | 19 | 27 | 22 | 24 | 25 | 29 | 26 | 28 |
| Slovenia                         | 1 | 2 | 6  | 4 | 5 | 18 | 3  | 7  | 12 | 10 | 22 | 9  | 14 | 8  | 21 | 13 | 15 | 11 | 23 | 19 | 16 | 20 | 28 | 17 | 24 | 26 | 25 | 27 | 29 |
| <b>Eastern Europe</b>            | 1 | 2 | 3  | 4 | 5 | 13 | 6  | 15 | 7  | 10 | 14 | 18 | 12 | 11 | 16 | 9  | 22 | 8  | 19 | 21 | 23 | 17 | 27 | 20 | 24 | 25 | 28 | 26 | 29 |
| Belarus                          | 1 | 2 | 3  | 4 | 5 | 12 | 6  | 16 | 7  | 9  | 11 | 18 | 14 | 15 | 13 | 10 | 23 | 8  | 17 | 19 | 21 | 22 | 28 | 20 | 24 | 25 | 27 | 26 | 29 |
| Estonia                          | 1 | 2 | 3  | 6 | 5 | 15 | 4  | 12 | 9  | 8  | 16 | 13 | 14 | 11 | 20 | 10 | 21 | 7  | 23 | 22 | 17 | 18 | 27 | 19 | 24 | 25 | 28 | 26 | 29 |
| Latvia                           | 1 | 2 | 3  | 4 | 5 | 13 | 6  | 16 | 11 | 10 | 17 | 15 | 12 | 7  | 18 | 9  | 24 | 8  | 20 | 22 | 19 | 14 | 27 | 21 | 23 | 25 | 28 | 26 | 29 |
| Lithuania                        | 1 | 2 | 3  | 5 | 6 | 13 | 4  | 14 | 11 | 9  | 15 | 16 | 12 | 10 | 18 | 8  | 23 | 7  | 20 | 21 | 19 | 17 | 27 | 22 | 24 | 25 | 28 | 26 | 29 |
| Republic of Moldova              | 1 | 2 | 3  | 4 | 5 | 19 | 6  | 16 | 7  | 15 | 8  | 18 | 10 | 9  | 17 | 13 | 24 | 11 | 14 | 12 | 22 | 20 | 25 | 21 | 23 | 27 | 29 | 26 | 28 |
| Russian Federation               | 1 | 2 | 3  | 4 | 5 | 10 | 6  | 15 | 7  | 11 | 14 | 18 | 13 | 12 | 17 | 9  | 22 | 8  | 19 | 21 | 23 | 16 | 28 | 20 | 24 | 25 | 27 | 26 | 29 |
| Ukraine                          | 1 | 2 | 3  | 4 | 5 | 15 | 6  | 16 | 7  | 9  | 14 | 19 | 10 | 12 | 13 | 11 | 22 | 8  | 18 | 20 | 23 | 17 | 27 | 21 | 24 | 26 | 28 | 25 | 29 |
| <b>High-income</b>               | 1 | 2 | 6  | 4 | 3 | 12 | 5  | 7  | 11 | 8  | 20 | 10 | 15 | 9  | 19 | 14 | 16 | 13 | 22 | 24 | 17 | 21 | 27 | 18 | 25 | 26 | 23 | 28 | 29 |
| <b>Australasia</b>               | 1 | 2 | 9  | 4 | 5 | 10 | 3  | 11 | 12 | 6  | 23 | 7  | 13 | 15 | 18 | 17 | 22 | 14 | 25 | 24 | 16 | 21 | 27 | 8  | 19 | 26 | 20 | 28 | 29 |
| Australia                        | 1 | 2 | 11 | 4 | 5 | 9  | 3  | 8  | 12 | 6  | 23 | 7  | 13 | 15 | 18 | 17 | 21 | 14 | 25 | 24 | 16 | 22 | 27 | 10 | 20 | 26 | 19 | 28 | 29 |
| New Zealand                      | 1 | 2 | 8  | 4 | 5 | 11 | 3  | 12 | 10 | 7  | 23 | 9  | 13 | 15 | 22 | 17 | 21 | 14 | 26 | 25 | 16 | 19 | 28 | 6  | 18 | 24 | 20 | 27 | 29 |
| <b>High-income Asia-Pacific</b>  | 1 | 2 | 3  | 7 | 5 | 9  | 8  | 4  | 11 | 13 | 17 | 10 | 19 | 12 | 18 | 15 | 6  | 14 | 25 | 21 | 16 | 20 | 26 | 27 | 23 | 22 | 24 | 28 | 29 |
| Brunei Darussalam                | 1 | 2 | 4  | 3 | 7 | 19 | 13 | 5  | 8  | 9  | 10 | 6  | 12 | 20 | 16 | 11 | 17 | 15 | 24 | 21 | 18 | 22 | 14 | 25 | 27 | 23 | 28 | 26 | 29 |
| Japan                            | 1 | 2 | 3  | 8 | 4 | 9  | 7  | 5  | 11 | 13 | 18 | 10 | 19 | 12 | 17 | 15 | 6  | 14 | 25 | 21 | 16 | 20 | 26 | 27 | 24 | 22 | 23 | 28 | 29 |
| Republic of Korea                | 1 | 4 | 3  | 7 | 5 | 11 | 8  | 2  | 9  | 12 | 17 | 10 | 15 | 13 | 19 | 16 | 6  | 14 | 21 | 22 | 18 | 24 | 26 | 25 | 23 | 20 | 27 | 28 | 29 |
| Singapore                        | 1 | 2 | 6  | 4 | 5 | 14 | 7  | 3  | 8  | 10 | 15 | 9  | 17 | 16 | 21 | 11 | 18 | 12 | 23 | 22 | 20 | 19 | 13 | 27 | 26 | 24 | 25 | 28 | 29 |
| <b>High-income North America</b> | 1 | 2 | 13 | 4 | 3 | 10 | 5  | 8  | 11 | 6  | 20 | 7  | 12 | 9  | 19 | 15 | 21 | 14 | 22 | 25 | 16 | 18 | 28 | 17 | 23 | 26 | 24 | 27 | 29 |
| Canada                           | 1 | 2 | 8  | 3 | 5 | 11 | 4  | 10 | 13 | 7  | 21 | 6  | 12 | 9  | 18 | 15 | 20 | 14 | 24 | 25 | 16 | 19 | 28 | 17 | 23 | 26 | 22 | 27 | 29 |
| Greenland                        | 1 | 2 | 5  | 6 | 3 | 4  | 10 | 7  | 9  | 19 | 15 | 14 | 13 | 16 | 17 | 12 | 21 | 8  | 22 | 18 | 20 | 25 | 11 | 23 | 27 | 26 | 24 | 28 | 29 |
| United States of America         | 1 | 2 | 15 | 4 | 3 | 10 | 5  | 8  | 11 | 6  | 19 | 7  | 12 | 9  | 20 | 14 | 21 | 13 | 22 | 25 | 16 | 18 | 28 | 17 | 23 | 26 | 24 | 27 | 29 |
| <b>Southern Latin America</b>    | 1 | 2 | 5  | 3 | 6 | 11 | 4  | 17 | 8  | 12 | 10 | 13 | 16 | 14 | 20 | 15 | 7  | 9  | 19 | 26 | 18 | 21 | 29 | 22 | 23 | 24 | 28 | 27 | 25 |
| Argentina                        | 1 | 2 | 6  | 3 | 4 | 10 | 5  | 17 | 8  | 11 | 7  | 12 | 15 | 14 | 20 | 16 | 13 | 9  | 18 | 26 | 19 | 21 | 29 | 22 | 23 | 24 | 27 | 28 | 25 |



|                                    |   |   |    |   |    |    |   |    |    |    |    |    |    |    |    |    |    |    |    |    |    |    |    |    |    |    |    |    |    |
|------------------------------------|---|---|----|---|----|----|---|----|----|----|----|----|----|----|----|----|----|----|----|----|----|----|----|----|----|----|----|----|----|
| Chile                              | 2 | 3 | 1  | 7 | 6  | 10 | 4 | 14 | 9  | 12 | 11 | 13 | 18 | 15 | 22 | 17 | 5  | 8  | 23 | 26 | 16 | 20 | 29 | 21 | 19 | 24 | 27 | 28 | 25 |
| Uruguay                            | 1 | 2 | 6  | 3 | 5  | 8  | 4 | 19 | 12 | 11 | 14 | 10 | 16 | 9  | 20 | 15 | 13 | 7  | 18 | 23 | 17 | 22 | 27 | 21 | 24 | 25 | 29 | 26 | 28 |
| <b>Western Europe</b>              | 1 | 2 | 6  | 3 | 5  | 12 | 4 | 10 | 9  | 8  | 21 | 11 | 14 | 7  | 19 | 15 | 17 | 13 | 23 | 24 | 16 | 20 | 28 | 18 | 25 | 26 | 22 | 27 | 29 |
| Andorra                            | 1 | 2 | 7  | 6 | 3  | 14 | 4 | 5  | 10 | 9  | 18 | 11 | 8  | 12 | 20 | 17 | 16 | 13 | 23 | 25 | 15 | 21 | 28 | 22 | 24 | 26 | 19 | 27 | 29 |
| Austria                            | 1 | 2 | 6  | 4 | 3  | 16 | 5 | 8  | 9  | 7  | 20 | 11 | 14 | 10 | 19 | 13 | 18 | 12 | 23 | 22 | 15 | 21 | 28 | 17 | 24 | 26 | 25 | 27 | 29 |
| Belgium                            | 1 | 2 | 7  | 3 | 5  | 10 | 4 | 12 | 9  | 8  | 20 | 11 | 15 | 6  | 17 | 14 | 22 | 13 | 23 | 24 | 16 | 19 | 27 | 18 | 25 | 26 | 21 | 28 | 29 |
| Cyprus                             | 1 | 2 | 6  | 3 | 5  | 19 | 4 | 12 | 10 | 7  | 17 | 9  | 11 | 8  | 21 | 13 | 18 | 15 | 23 | 27 | 14 | 16 | 28 | 20 | 22 | 25 | 24 | 26 | 29 |
| Denmark                            | 1 | 2 | 9  | 4 | 5  | 8  | 3 | 15 | 11 | 7  | 20 | 14 | 10 | 6  | 18 | 12 | 21 | 13 | 24 | 22 | 16 | 19 | 28 | 17 | 25 | 26 | 23 | 27 | 29 |
| Finland                            | 1 | 2 | 6  | 5 | 3  | 16 | 4 | 9  | 8  | 12 | 21 | 7  | 13 | 14 | 20 | 11 | 17 | 10 | 26 | 25 | 15 | 19 | 28 | 18 | 24 | 23 | 22 | 27 | 29 |
| France                             | 1 | 2 | 9  | 3 | 5  | 13 | 4 | 6  | 10 | 8  | 21 | 11 | 15 | 7  | 17 | 14 | 24 | 12 | 22 | 20 | 16 | 19 | 27 | 18 | 25 | 26 | 23 | 28 | 29 |
| Germany                            | 1 | 2 | 6  | 3 | 4  | 14 | 5 | 12 | 7  | 8  | 21 | 11 | 13 | 9  | 19 | 15 | 17 | 10 | 23 | 20 | 16 | 22 | 28 | 18 | 26 | 25 | 24 | 27 | 29 |
| Greece                             | 1 | 2 | 6  | 3 | 5  | 20 | 4 | 12 | 10 | 8  | 19 | 15 | 9  | 7  | 21 | 13 | 17 | 11 | 16 | 28 | 14 | 18 | 26 | 22 | 23 | 25 | 27 | 24 | 29 |
| Iceland                            | 1 | 2 | 7  | 5 | 4  | 10 | 3 | 14 | 9  | 12 | 21 | 13 | 8  | 11 | 18 | 16 | 20 | 6  | 24 | 26 | 15 | 22 | 28 | 17 | 25 | 19 | 23 | 27 | 29 |
| Ireland                            | 1 | 2 | 7  | 3 | 5  | 6  | 4 | 15 | 14 | 9  | 20 | 8  | 11 | 12 | 19 | 10 | 22 | 13 | 23 | 24 | 16 | 18 | 28 | 17 | 21 | 26 | 25 | 27 | 29 |
| Israel                             | 1 | 2 | 7  | 3 | 4  | 17 | 5 | 15 | 11 | 6  | 19 | 8  | 10 | 9  | 22 | 12 | 21 | 14 | 23 | 27 | 13 | 18 | 28 | 16 | 20 | 24 | 26 | 25 | 29 |
| Italy                              | 1 | 2 | 5  | 3 | 4  | 17 | 6 | 9  | 10 | 8  | 23 | 11 | 14 | 7  | 19 | 13 | 15 | 12 | 21 | 25 | 16 | 20 | 28 | 18 | 24 | 26 | 22 | 27 | 29 |
| Luxembourg                         | 1 | 2 | 7  | 3 | 4  | 14 | 5 | 12 | 10 | 6  | 22 | 13 | 9  | 8  | 19 | 11 | 21 | 17 | 23 | 20 | 15 | 18 | 27 | 16 | 25 | 26 | 24 | 28 | 29 |
| Malta                              | 1 | 2 | 6  | 3 | 4  | 15 | 5 | 14 | 8  | 11 | 22 | 10 | 13 | 7  | 18 | 9  | 23 | 12 | 20 | 27 | 16 | 17 | 24 | 19 | 25 | 26 | 21 | 28 | 29 |
| Monaco                             | 1 | 2 | 11 | 4 | 3  | 13 | 6 | 10 | 14 | 9  | 19 | 5  | 16 | 7  | 23 | 12 | 24 | 15 | 17 | 27 | 8  | 22 | 29 | 18 | 26 | 21 | 20 | 25 | 28 |
| Netherlands                        | 1 | 2 | 6  | 3 | 5  | 7  | 4 | 16 | 11 | 9  | 22 | 10 | 15 | 8  | 21 | 13 | 19 | 12 | 23 | 24 | 14 | 20 | 28 | 17 | 25 | 26 | 18 | 27 | 29 |
| Norway                             | 1 | 2 | 6  | 5 | 4  | 16 | 3 | 17 | 8  | 15 | 19 | 12 | 11 | 7  | 21 | 10 | 20 | 9  | 26 | 25 | 13 | 18 | 28 | 14 | 23 | 24 | 22 | 27 | 29 |
| Portugal                           | 2 | 1 | 3  | 5 | 6  | 13 | 4 | 9  | 11 | 8  | 21 | 10 | 12 | 7  | 17 | 16 | 18 | 15 | 19 | 22 | 14 | 20 | 26 | 23 | 24 | 25 | 27 | 28 | 29 |
| San Marino                         | 1 | 2 | 3  | 6 | 5  | 19 | 4 | 13 | 9  | 10 | 21 | 7  | 11 | 8  | 18 | 17 | 14 | 16 | 20 | 27 | 12 | 28 | 26 | 15 | 25 | 22 | 23 | 24 | 29 |
| Spain                              | 1 | 2 | 6  | 4 | 5  | 16 | 3 | 8  | 10 | 9  | 21 | 11 | 12 | 7  | 18 | 14 | 19 | 13 | 20 | 23 | 15 | 17 | 27 | 22 | 24 | 26 | 25 | 28 | 29 |
| Sweden                             | 1 | 2 | 11 | 5 | 4  | 17 | 3 | 16 | 8  | 7  | 20 | 9  | 13 | 6  | 21 | 12 | 18 | 10 | 26 | 23 | 14 | 19 | 28 | 15 | 24 | 25 | 22 | 27 | 29 |
| Switzerland                        | 1 | 2 | 7  | 4 | 5  | 12 | 3 | 6  | 10 | 11 | 21 | 9  | 14 | 8  | 18 | 13 | 19 | 15 | 25 | 23 | 16 | 22 | 27 | 17 | 24 | 26 | 20 | 28 | 29 |
| United Kingdom                     | 1 | 2 | 7  | 4 | 5  | 6  | 3 | 13 | 12 | 10 | 21 | 9  | 15 | 8  | 20 | 11 | 22 | 14 | 25 | 24 | 16 | 19 | 28 | 18 | 23 | 26 | 17 | 27 | 29 |
| <b>Latin America and Caribbean</b> | 1 | 3 | 2  | 5 | 6  | 10 | 4 | 12 | 8  | 9  | 7  | 13 | 11 | 17 | 19 | 15 | 14 | 16 | 18 | 23 | 20 | 21 | 29 | 24 | 22 | 25 | 28 | 26 | 27 |
| <b>Andean Latin America</b>        | 3 | 4 | 1  | 6 | 8  | 17 | 2 | 13 | 9  | 7  | 5  | 10 | 12 | 18 | 22 | 14 | 11 | 15 | 24 | 27 | 19 | 16 | 29 | 23 | 21 | 20 | 28 | 26 | 25 |
| Bolivia (Plurnational State of)    | 3 | 5 | 1  | 6 | 11 | 16 | 2 | 12 | 9  | 7  | 4  | 10 | 13 | 17 | 23 | 15 | 8  | 18 | 24 | 27 | 19 | 14 | 29 | 21 | 22 | 20 | 28 | 25 | 26 |
| Ecuador                            | 4 | 3 | 1  | 6 | 8  | 17 | 2 | 11 | 9  | 7  | 5  | 10 | 13 | 18 | 22 | 14 | 12 | 15 | 24 | 27 | 20 | 16 | 28 | 23 | 21 | 19 | 29 | 25 | 26 |
| Peru                               | 2 | 4 | 1  | 6 | 7  | 17 | 3 | 13 | 10 | 8  | 5  | 9  | 12 | 18 | 22 | 14 | 11 | 15 | 24 | 27 | 19 | 16 | 29 | 23 | 20 | 21 | 28 | 26 | 25 |
| <b>Caribbean</b>                   | 1 | 3 | 5  | 4 | 7  | 10 | 2 | 12 | 8  | 9  | 6  | 11 | 18 | 15 | 16 | 19 | 21 | 20 | 14 | 23 | 17 | 13 | 25 | 26 | 22 | 24 | 28 | 27 | 29 |
| Antigua and Barbuda                | 5 | 3 | 4  | 2 | 6  | 12 | 1 | 15 | 8  | 9  | 7  | 11 | 17 | 16 | 19 | 10 | 21 | 18 | 20 | 22 | 13 | 14 | 26 | 23 | 24 | 25 | 29 | 28 | 27 |

|                                     |   |   |   |   |    |    |    |    |    |    |    |    |    |    |    |    |    |    |    |    |    |    |    |    |    |    |    |    |    |
|-------------------------------------|---|---|---|---|----|----|----|----|----|----|----|----|----|----|----|----|----|----|----|----|----|----|----|----|----|----|----|----|----|
| Bahamas                             | 4 | 3 | 5 | 2 | 10 | 7  | 1  | 14 | 8  | 13 | 6  | 12 | 18 | 21 | 15 | 11 | 20 | 19 | 17 | 22 | 9  | 16 | 26 | 23 | 25 | 24 | 28 | 27 | 29 |
| Barbados                            | 5 | 2 | 4 | 3 | 6  | 11 | 1  | 16 | 10 | 12 | 7  | 9  | 19 | 15 | 18 | 14 | 20 | 17 | 21 | 22 | 8  | 13 | 24 | 25 | 26 | 23 | 28 | 27 | 29 |
| Belize                              | 2 | 4 | 5 | 6 | 7  | 11 | 1  | 10 | 8  | 9  | 3  | 14 | 12 | 16 | 20 | 18 | 19 | 15 | 17 | 23 | 22 | 13 | 27 | 26 | 21 | 28 | 25 | 24 | 29 |
| Bermuda                             | 1 | 3 | 6 | 4 | 5  | 8  | 2  | 17 | 11 | 12 | 20 | 9  | 15 | 7  | 16 | 10 | 24 | 14 | 21 | 22 | 13 | 18 | 27 | 19 | 23 | 25 | 26 | 28 | 29 |
| Cuba                                | 1 | 2 | 6 | 4 | 5  | 7  | 3  | 17 | 9  | 12 | 11 | 14 | 16 | 10 | 15 | 21 | 23 | 20 | 8  | 22 | 19 | 13 | 27 | 25 | 18 | 24 | 28 | 26 | 29 |
| Dominica                            | 3 | 5 | 2 | 4 | 6  | 12 | 1  | 14 | 8  | 11 | 7  | 9  | 22 | 13 | 15 | 21 | 19 | 16 | 17 | 20 | 10 | 18 | 25 | 26 | 23 | 24 | 28 | 27 | 29 |
| Dominican Republic                  | 2 | 3 | 5 | 4 | 10 | 15 | 1  | 8  | 7  | 9  | 6  | 13 | 22 | 21 | 12 | 23 | 14 | 16 | 17 | 18 | 20 | 11 | 25 | 26 | 19 | 24 | 28 | 27 | 29 |
| Grenada                             | 4 | 2 | 5 | 3 | 6  | 9  | 1  | 14 | 11 | 12 | 7  | 8  | 18 | 15 | 17 | 13 | 20 | 19 | 22 | 21 | 16 | 10 | 26 | 25 | 24 | 23 | 28 | 27 | 29 |
| Guyana                              | 5 | 3 | 6 | 2 | 7  | 14 | 1  | 12 | 8  | 10 | 4  | 13 | 18 | 17 | 16 | 9  | 19 | 15 | 20 | 23 | 21 | 11 | 28 | 26 | 24 | 22 | 27 | 25 | 29 |
| Haiti                               | 5 | 6 | 4 | 3 | 16 | 12 | 1  | 10 | 8  | 7  | 2  | 9  | 11 | 15 | 18 | 20 | 19 | 21 | 17 | 22 | 14 | 13 | 24 | 26 | 27 | 25 | 28 | 23 | 29 |
| Jamaica                             | 2 | 3 | 5 | 4 | 8  | 15 | 1  | 14 | 10 | 9  | 6  | 7  | 18 | 16 | 21 | 13 | 17 | 20 | 19 | 23 | 12 | 11 | 24 | 25 | 26 | 22 | 28 | 27 | 29 |
| Puerto Rico                         | 3 | 1 | 6 | 4 | 5  | 13 | 2  | 11 | 9  | 7  | 16 | 8  | 17 | 12 | 19 | 14 | 22 | 15 | 21 | 23 | 10 | 18 | 27 | 24 | 20 | 25 | 28 | 26 | 29 |
| Saint Kitts and Nevis               | 4 | 2 | 5 | 3 | 6  | 10 | 1  | 11 | 8  | 13 | 7  | 9  | 19 | 16 | 18 | 12 | 21 | 17 | 20 | 23 | 14 | 15 | 25 | 27 | 22 | 24 | 26 | 29 | 28 |
| Saint Lucia                         | 2 | 5 | 4 | 3 | 6  | 10 | 1  | 17 | 9  | 12 | 7  | 8  | 19 | 13 | 15 | 14 | 22 | 20 | 18 | 21 | 11 | 16 | 25 | 23 | 27 | 24 | 29 | 26 | 28 |
| Saint Vincent and the Grenadines    | 5 | 3 | 4 | 2 | 8  | 17 | 1  | 13 | 9  | 10 | 6  | 7  | 18 | 16 | 12 | 14 | 22 | 20 | 15 | 21 | 19 | 11 | 26 | 25 | 23 | 24 | 28 | 27 | 29 |
| Suriname                            | 3 | 2 | 7 | 4 | 6  | 18 | 1  | 13 | 8  | 10 | 5  | 9  | 11 | 15 | 17 | 12 | 20 | 16 | 22 | 24 | 14 | 19 | 21 | 27 | 26 | 23 | 29 | 25 | 28 |
| Trinidad and Tobago                 | 4 | 2 | 7 | 3 | 5  | 17 | 1  | 13 | 8  | 11 | 6  | 12 | 19 | 16 | 18 | 10 | 20 | 15 | 21 | 22 | 14 | 9  | 25 | 26 | 24 | 23 | 28 | 27 | 29 |
| United States Virgin Islands        | 3 | 2 | 6 | 4 | 5  | 11 | 1  | 16 | 10 | 13 | 12 | 9  | 15 | 19 | 17 | 8  | 21 | 14 | 20 | 23 | 7  | 18 | 24 | 22 | 27 | 26 | 25 | 28 | 29 |
| <b>Central Latin America</b>        | 2 | 3 | 1 | 5 | 7  | 16 | 4  | 10 | 9  | 8  | 6  | 11 | 13 | 17 | 21 | 12 | 15 | 14 | 20 | 27 | 18 | 22 | 29 | 24 | 19 | 23 | 28 | 25 | 26 |
| Colombia                            | 2 | 3 | 1 | 5 | 6  | 15 | 4  | 11 | 9  | 8  | 7  | 10 | 13 | 17 | 21 | 12 | 14 | 16 | 20 | 27 | 18 | 23 | 29 | 22 | 19 | 24 | 28 | 25 | 26 |
| Costa Rica                          | 4 | 2 | 1 | 5 | 6  | 18 | 3  | 7  | 10 | 8  | 11 | 9  | 12 | 16 | 22 | 15 | 17 | 14 | 23 | 26 | 13 | 19 | 27 | 21 | 20 | 25 | 29 | 24 | 28 |
| El Salvador                         | 2 | 4 | 1 | 6 | 7  | 15 | 3  | 14 | 9  | 8  | 5  | 12 | 10 | 18 | 19 | 13 | 11 | 16 | 20 | 25 | 22 | 17 | 27 | 26 | 21 | 23 | 29 | 24 | 28 |
| Guatemala                           | 5 | 4 | 1 | 7 | 10 | 13 | 2  | 8  | 9  | 6  | 3  | 12 | 11 | 19 | 20 | 14 | 15 | 16 | 21 | 27 | 23 | 17 | 28 | 26 | 18 | 22 | 29 | 25 | 24 |
| Honduras                            | 1 | 7 | 3 | 5 | 10 | 18 | 4  | 2  | 8  | 6  | 9  | 13 | 12 | 21 | 20 | 14 | 15 | 17 | 22 | 24 | 19 | 16 | 28 | 26 | 23 | 11 | 25 | 27 | 29 |
| Mexico                              | 1 | 2 | 3 | 5 | 6  | 16 | 4  | 10 | 9  | 8  | 7  | 12 | 15 | 17 | 21 | 13 | 14 | 11 | 20 | 28 | 18 | 23 | 29 | 24 | 19 | 22 | 27 | 26 | 25 |
| Nicaragua                           | 5 | 3 | 1 | 6 | 7  | 16 | 2  | 10 | 9  | 8  | 4  | 12 | 13 | 18 | 21 | 14 | 11 | 15 | 17 | 25 | 22 | 20 | 28 | 24 | 19 | 23 | 29 | 26 | 27 |
| Panama                              | 4 | 2 | 3 | 5 | 7  | 15 | 1  | 10 | 9  | 8  | 6  | 11 | 12 | 18 | 20 | 13 | 19 | 14 | 21 | 23 | 16 | 17 | 26 | 25 | 24 | 22 | 29 | 27 | 28 |
| Venezuela (Bolivarian Republic of)  | 1 | 4 | 3 | 5 | 7  | 15 | 2  | 13 | 8  | 9  | 6  | 10 | 16 | 18 | 22 | 12 | 17 | 11 | 14 | 25 | 20 | 21 | 27 | 24 | 19 | 23 | 29 | 26 | 28 |
| <b>Tropical Latin America</b>       | 1 | 2 | 4 | 5 | 6  | 7  | 3  | 13 | 8  | 11 | 9  | 12 | 10 | 15 | 14 | 17 | 18 | 19 | 16 | 21 | 20 | 22 | 28 | 24 | 23 | 25 | 26 | 27 | 29 |
| Brazil                              | 1 | 2 | 4 | 5 | 6  | 7  | 3  | 13 | 8  | 11 | 9  | 12 | 10 | 14 | 15 | 17 | 18 | 19 | 16 | 21 | 20 | 22 | 28 | 24 | 23 | 25 | 26 | 27 | 29 |
| Paraguay                            | 1 | 2 | 6 | 4 | 7  | 10 | 3  | 12 | 8  | 9  | 5  | 11 | 13 | 20 | 18 | 14 | 16 | 15 | 19 | 22 | 23 | 17 | 29 | 25 | 21 | 24 | 28 | 27 | 26 |
| <b>North Africa and Middle East</b> | 1 | 3 | 2 | 4 | 7  | 13 | 9  | 5  | 8  | 6  | 16 | 12 | 10 | 11 | 20 | 14 | 17 | 18 | 15 | 27 | 19 | 21 | 22 | 26 | 25 | 23 | 28 | 24 | 29 |
| <b>North Africa and Middle East</b> | 1 | 3 | 2 | 4 | 7  | 13 | 9  | 5  | 8  | 6  | 16 | 12 | 10 | 11 | 20 | 14 | 17 | 18 | 15 | 27 | 19 | 21 | 22 | 26 | 25 | 23 | 28 | 24 | 29 |
| Afghanistan                         | 5 | 8 | 1 | 7 | 15 | 10 | 12 | 6  | 2  | 3  | 11 | 4  | 9  | 14 | 21 | 17 | 16 | 20 | 13 | 26 | 19 | 22 | 24 | 25 | 27 | 23 | 28 | 18 | 29 |

|                                               |   |   |    |   |    |    |    |    |    |    |    |    |    |    |    |    |    |    |    |    |    |    |    |    |    |    |    |    |    |
|-----------------------------------------------|---|---|----|---|----|----|----|----|----|----|----|----|----|----|----|----|----|----|----|----|----|----|----|----|----|----|----|----|----|
| Algeria                                       | 1 | 3 | 4  | 2 | 7  | 19 | 8  | 12 | 5  | 10 | 11 | 6  | 15 | 14 | 21 | 16 | 9  | 20 | 17 | 23 | 18 | 26 | 13 | 27 | 25 | 24 | 29 | 22 | 28 |
| Bahrain                                       | 1 | 3 | 6  | 2 | 4  | 15 | 8  | 7  | 9  | 5  | 17 | 10 | 12 | 13 | 18 | 11 | 19 | 14 | 21 | 27 | 16 | 20 | 24 | 28 | 25 | 23 | 26 | 22 | 29 |
| Egypt                                         | 2 | 5 | 7  | 4 | 9  | 13 | 11 | 1  | 6  | 8  | 19 | 12 | 10 | 3  | 21 | 15 | 14 | 17 | 18 | 24 | 16 | 20 | 27 | 26 | 25 | 22 | 29 | 23 | 28 |
| Iran (Islamic Republic of)                    | 2 | 3 | 1  | 4 | 8  | 10 | 6  | 11 | 9  | 5  | 18 | 13 | 7  | 12 | 20 | 15 | 17 | 16 | 14 | 26 | 19 | 21 | 27 | 23 | 24 | 22 | 29 | 25 | 28 |
| Iraq                                          | 1 | 5 | 9  | 2 | 8  | 17 | 11 | 7  | 6  | 3  | 16 | 12 | 4  | 10 | 19 | 14 | 20 | 15 | 13 | 24 | 21 | 18 | 26 | 28 | 25 | 22 | 27 | 23 | 29 |
| Jordan                                        | 1 | 2 | 7  | 3 | 5  | 16 | 9  | 12 | 8  | 4  | 17 | 6  | 10 | 11 | 18 | 13 | 15 | 14 | 21 | 25 | 19 | 20 | 23 | 28 | 24 | 22 | 26 | 29 | 27 |
| Kuwait                                        | 1 | 2 | 9  | 3 | 4  | 15 | 5  | 12 | 8  | 6  | 18 | 7  | 11 | 10 | 20 | 13 | 16 | 14 | 21 | 26 | 17 | 19 | 24 | 28 | 23 | 22 | 25 | 27 | 29 |
| Lebanon                                       | 1 | 3 | 6  | 2 | 7  | 21 | 4  | 13 | 9  | 8  | 19 | 12 | 11 | 5  | 20 | 10 | 17 | 16 | 14 | 27 | 15 | 18 | 25 | 24 | 26 | 23 | 29 | 22 | 28 |
| Libya                                         | 1 | 2 | 6  | 3 | 4  | 20 | 11 | 7  | 8  | 5  | 17 | 12 | 10 | 9  | 22 | 14 | 16 | 18 | 13 | 26 | 19 | 23 | 15 | 27 | 25 | 24 | 28 | 21 | 29 |
| Morocco                                       | 1 | 3 | 4  | 2 | 8  | 16 | 7  | 14 | 9  | 12 | 5  | 6  | 17 | 15 | 19 | 11 | 18 | 22 | 10 | 24 | 20 | 21 | 13 | 27 | 26 | 23 | 28 | 25 | 29 |
| Oman                                          | 1 | 2 | 5  | 3 | 8  | 13 | 11 | 9  | 4  | 7  | 16 | 6  | 10 | 14 | 18 | 12 | 19 | 17 | 21 | 25 | 15 | 27 | 26 | 28 | 22 | 24 | 23 | 20 | 29 |
| Palestine                                     | 1 | 2 | 6  | 3 | 7  | 19 | 9  | 8  | 10 | 5  | 18 | 11 | 4  | 12 | 22 | 13 | 15 | 16 | 20 | 26 | 17 | 14 | 25 | 27 | 24 | 23 | 28 | 21 | 29 |
| Qatar                                         | 1 | 4 | 8  | 3 | 6  | 13 | 11 | 2  | 9  | 5  | 18 | 7  | 10 | 15 | 20 | 14 | 19 | 12 | 16 | 22 | 17 | 24 | 21 | 27 | 26 | 25 | 28 | 23 | 29 |
| Saudi Arabia                                  | 2 | 1 | 9  | 3 | 5  | 14 | 11 | 8  | 6  | 7  | 18 | 4  | 10 | 19 | 17 | 12 | 15 | 13 | 22 | 25 | 20 | 23 | 16 | 27 | 26 | 21 | 29 | 24 | 28 |
| Sudan                                         | 3 | 5 | 1  | 4 | 11 | 8  | 9  | 10 | 6  | 2  | 15 | 13 | 7  | 12 | 21 | 18 | 17 | 16 | 14 | 27 | 19 | 23 | 26 | 24 | 25 | 22 | 29 | 20 | 28 |
| Syrian Arab Republic                          | 2 | 4 | 6  | 3 | 9  | 14 | 8  | 7  | 10 | 1  | 15 | 12 | 5  | 11 | 21 | 13 | 19 | 17 | 16 | 23 | 18 | 20 | 26 | 25 | 22 | 24 | 28 | 27 | 29 |
| Tunisia                                       | 1 | 2 | 4  | 3 | 6  | 21 | 7  | 14 | 8  | 9  | 15 | 16 | 20 | 5  | 17 | 12 | 11 | 18 | 10 | 23 | 19 | 22 | 13 | 27 | 25 | 24 | 28 | 26 | 29 |
| Turkey                                        | 1 | 2 | 3  | 5 | 4  | 17 | 6  | 12 | 9  | 7  | 19 | 11 | 8  | 10 | 23 | 13 | 18 | 14 | 15 | 29 | 16 | 20 | 26 | 24 | 22 | 25 | 21 | 27 | 28 |
| United Arab Emirates                          | 2 | 4 | 10 | 3 | 1  | 5  | 15 | 12 | 9  | 8  | 18 | 7  | 6  | 13 | 19 | 17 | 20 | 11 | 14 | 24 | 16 | 27 | 23 | 25 | 26 | 22 | 29 | 21 | 28 |
| Yemen                                         | 2 | 5 | 1  | 4 | 15 | 8  | 9  | 10 | 6  | 3  | 13 | 14 | 7  | 12 | 20 | 17 | 16 | 21 | 11 | 27 | 18 | 23 | 24 | 25 | 26 | 22 | 29 | 19 | 28 |
| <b>South Asia</b>                             | 2 | 5 | 3  | 1 | 12 | 8  | 11 | 14 | 4  | 10 | 9  | 16 | 18 | 19 | 6  | 17 | 15 | 22 | 13 | 7  | 21 | 23 | 20 | 29 | 26 | 24 | 27 | 25 | 28 |
| <b>South Asia</b>                             | 2 | 5 | 3  | 1 | 12 | 8  | 11 | 14 | 4  | 10 | 9  | 16 | 18 | 19 | 6  | 17 | 15 | 22 | 13 | 7  | 21 | 23 | 20 | 29 | 26 | 24 | 27 | 25 | 28 |
| Bangladesh                                    | 2 | 5 | 4  | 3 | 14 | 7  | 8  | 11 | 1  | 12 | 10 | 18 | 15 | 19 | 6  | 17 | 16 | 22 | 13 | 9  | 21 | 24 | 20 | 27 | 26 | 23 | 28 | 25 | 29 |
| Bhutan                                        | 2 | 3 | 1  | 4 | 13 | 6  | 8  | 12 | 5  | 11 | 10 | 16 | 17 | 19 | 7  | 15 | 14 | 22 | 18 | 9  | 20 | 24 | 21 | 27 | 26 | 23 | 28 | 25 | 29 |
| India                                         | 1 | 4 | 3  | 2 | 11 | 9  | 12 | 13 | 6  | 10 | 8  | 16 | 17 | 19 | 5  | 18 | 15 | 22 | 14 | 7  | 21 | 24 | 20 | 28 | 26 | 23 | 27 | 25 | 29 |
| Nepal                                         | 4 | 6 | 3  | 2 | 12 | 5  | 10 | 16 | 1  | 11 | 7  | 17 | 18 | 19 | 8  | 15 | 13 | 22 | 14 | 9  | 21 | 24 | 20 | 27 | 26 | 23 | 28 | 25 | 29 |
| Pakistan                                      | 2 | 6 | 7  | 1 | 17 | 5  | 12 | 15 | 3  | 10 | 18 | 19 | 14 | 11 | 4  | 8  | 16 | 25 | 9  | 13 | 23 | 20 | 22 | 27 | 28 | 24 | 29 | 21 | 26 |
| <b>Southeast Asia, East Asia, and Oceania</b> | 1 | 3 | 2  | 6 | 7  | 4  | 10 | 5  | 8  | 9  | 11 | 13 | 12 | 14 | 18 | 15 | 16 | 19 | 20 | 25 | 23 | 21 | 17 | 26 | 22 | 24 | 28 | 27 | 29 |
| <b>East Asia</b>                              | 1 | 3 | 2  | 7 | 6  | 4  | 11 | 5  | 8  | 10 | 12 | 13 | 9  | 14 | 19 | 16 | 15 | 18 | 20 | 25 | 22 | 23 | 17 | 26 | 21 | 24 | 27 | 28 | 29 |
| China                                         | 1 | 3 | 2  | 7 | 6  | 4  | 11 | 5  | 8  | 10 | 12 | 13 | 9  | 14 | 19 | 16 | 15 | 18 | 20 | 25 | 22 | 23 | 17 | 26 | 21 | 24 | 27 | 28 | 29 |
| Democratic People's Republic of Korea         | 1 | 3 | 2  | 6 | 10 | 5  | 12 | 4  | 8  | 9  | 7  | 13 | 11 | 15 | 18 | 17 | 14 | 21 | 20 | 26 | 23 | 19 | 16 | 25 | 22 | 24 | 28 | 27 | 29 |
| Taiwan (Province of China)                    | 1 | 2 | 3  | 7 | 4  | 5  | 9  | 6  | 10 | 13 | 15 | 12 | 20 | 11 | 8  | 19 | 16 | 14 | 23 | 17 | 21 | 22 | 18 | 26 | 25 | 24 | 27 | 28 | 29 |
| <b>Oceania</b>                                | 2 | 5 | 3  | 1 | 11 | 12 | 6  | 9  | 8  | 7  | 4  | 15 | 10 | 17 | 14 | 16 | 20 | 23 | 21 | 27 | 19 | 13 | 18 | 25 | 24 | 22 | 28 | 26 | 29 |
| American Samoa                                | 1 | 4 | 5  | 3 | 11 | 17 | 2  | 6  | 9  | 12 | 10 | 13 | 15 | 14 | 22 | 8  | 23 | 21 | 24 | 26 | 18 | 7  | 16 | 25 | 20 | 19 | 27 | 28 | 29 |



|                                   |   |   |   |   |    |    |    |    |    |    |    |    |    |    |    |    |    |    |    |    |    |    |    |    |    |    |    |    |    |
|-----------------------------------|---|---|---|---|----|----|----|----|----|----|----|----|----|----|----|----|----|----|----|----|----|----|----|----|----|----|----|----|----|
| Cook Islands                      | 1 | 5 | 6 | 3 | 7  | 10 | 2  | 4  | 9  | 11 | 12 | 13 | 15 | 8  | 16 | 14 | 18 | 19 | 22 | 25 | 20 | 17 | 26 | 24 | 23 | 21 | 27 | 28 | 29 |
| Fiji                              | 4 | 3 | 7 | 1 | 10 | 11 | 5  | 8  | 9  | 6  | 2  | 13 | 16 | 15 | 14 | 19 | 18 | 21 | 22 | 26 | 20 | 12 | 25 | 28 | 24 | 17 | 29 | 27 | 23 |
| Guam                              | 1 | 2 | 6 | 3 | 7  | 11 | 4  | 5  | 13 | 9  | 10 | 8  | 18 | 16 | 15 | 14 | 23 | 19 | 25 | 24 | 20 | 17 | 12 | 26 | 22 | 21 | 27 | 28 | 29 |
| Kiribati                          | 3 | 8 | 4 | 2 | 15 | 9  | 11 | 5  | 7  | 10 | 1  | 12 | 19 | 21 | 6  | 18 | 20 | 14 | 24 | 23 | 22 | 13 | 17 | 28 | 27 | 26 | 29 | 25 | 16 |
| Marshall Islands                  | 1 | 6 | 3 | 2 | 10 | 15 | 7  | 5  | 9  | 8  | 4  | 12 | 13 | 17 | 16 | 14 | 20 | 23 | 21 | 27 | 19 | 11 | 18 | 25 | 24 | 22 | 28 | 26 | 29 |
| Micronesia (Federated States of)  | 1 | 4 | 3 | 2 | 10 | 14 | 7  | 6  | 9  | 8  | 5  | 13 | 15 | 17 | 16 | 12 | 20 | 21 | 22 | 26 | 19 | 11 | 18 | 25 | 24 | 23 | 27 | 28 | 29 |
| Nauru                             | 1 | 4 | 3 | 2 | 10 | 15 | 9  | 6  | 8  | 7  | 5  | 11 | 12 | 17 | 16 | 14 | 21 | 19 | 22 | 26 | 20 | 13 | 18 | 25 | 24 | 23 | 28 | 27 | 29 |
| Niue                              | 1 | 3 | 5 | 2 | 7  | 13 | 4  | 6  | 9  | 10 | 8  | 12 | 17 | 15 | 16 | 11 | 21 | 18 | 24 | 26 | 19 | 14 | 20 | 25 | 22 | 23 | 27 | 28 | 29 |
| Northern Mariana Islands          | 1 | 2 | 4 | 3 | 8  | 15 | 6  | 5  | 10 | 12 | 7  | 14 | 16 | 18 | 9  | 17 | 24 | 20 | 25 | 21 | 19 | 11 | 13 | 26 | 22 | 23 | 27 | 28 | 29 |
| Palau                             | 1 | 5 | 9 | 2 | 7  | 11 | 10 | 8  | 6  | 12 | 3  | 13 | 14 | 18 | 4  | 15 | 21 | 20 | 23 | 26 | 22 | 25 | 24 | 19 | 17 | 16 | 27 | 28 | 29 |
| Papua New Guinea                  | 2 | 6 | 3 | 1 | 13 | 10 | 5  | 15 | 8  | 7  | 4  | 18 | 9  | 17 | 12 | 16 | 20 | 23 | 21 | 27 | 19 | 11 | 14 | 25 | 24 | 22 | 28 | 26 | 29 |
| Samoa                             | 3 | 4 | 2 | 1 | 11 | 17 | 7  | 8  | 5  | 9  | 6  | 12 | 15 | 14 | 19 | 10 | 21 | 22 | 26 | 28 | 24 | 13 | 16 | 18 | 23 | 25 | 29 | 20 | 27 |
| Solomon Islands                   | 2 | 5 | 3 | 1 | 14 | 13 | 8  | 10 | 9  | 6  | 4  | 7  | 12 | 18 | 15 | 17 | 19 | 23 | 21 | 27 | 20 | 11 | 16 | 25 | 24 | 22 | 28 | 26 | 29 |
| Tokelau                           | 1 | 3 | 5 | 2 | 9  | 14 | 4  | 7  | 8  | 10 | 6  | 12 | 16 | 15 | 17 | 13 | 20 | 21 | 24 | 26 | 18 | 11 | 19 | 25 | 22 | 23 | 27 | 28 | 29 |
| Tonga                             | 1 | 8 | 4 | 3 | 11 | 15 | 5  | 2  | 10 | 12 | 6  | 9  | 17 | 18 | 19 | 14 | 23 | 22 | 25 | 27 | 20 | 16 | 21 | 26 | 13 | 24 | 29 | 28 | 7  |
| Tuvalu                            | 1 | 5 | 3 | 2 | 10 | 14 | 4  | 7  | 8  | 9  | 6  | 12 | 15 | 16 | 17 | 13 | 20 | 22 | 21 | 26 | 19 | 11 | 18 | 25 | 24 | 23 | 28 | 27 | 29 |
| Vanuatu                           | 1 | 7 | 2 | 3 | 10 | 12 | 4  | 5  | 9  | 8  | 6  | 13 | 11 | 16 | 15 | 18 | 20 | 23 | 21 | 28 | 19 | 14 | 17 | 25 | 24 | 22 | 27 | 26 | 29 |
| <b>Southeast Asia</b>             | 1 | 2 | 5 | 3 | 9  | 13 | 8  | 4  | 6  | 7  | 10 | 11 | 15 | 18 | 14 | 12 | 17 | 19 | 21 | 23 | 24 | 20 | 16 | 26 | 25 | 22 | 28 | 27 | 29 |
| Cambodia                          | 1 | 2 | 4 | 5 | 10 | 14 | 9  | 3  | 7  | 6  | 8  | 13 | 12 | 18 | 15 | 11 | 20 | 22 | 19 | 25 | 23 | 17 | 16 | 27 | 24 | 21 | 28 | 26 | 29 |
| Indonesia                         | 1 | 2 | 5 | 3 | 8  | 12 | 6  | 14 | 4  | 7  | 9  | 11 | 13 | 18 | 15 | 10 | 22 | 19 | 20 | 25 | 24 | 16 | 17 | 27 | 23 | 21 | 28 | 26 | 29 |
| Lao People's Democratic Republic  | 1 | 2 | 4 | 3 | 10 | 14 | 9  | 5  | 8  | 6  | 7  | 13 | 11 | 18 | 15 | 12 | 21 | 20 | 19 | 25 | 23 | 17 | 16 | 27 | 24 | 22 | 28 | 26 | 29 |
| Malaysia                          | 1 | 2 | 4 | 3 | 12 | 14 | 10 | 5  | 11 | 6  | 9  | 8  | 17 | 13 | 15 | 16 | 21 | 18 | 20 | 23 | 24 | 19 | 7  | 26 | 25 | 22 | 29 | 27 | 28 |
| Maldives                          | 1 | 2 | 9 | 3 | 5  | 15 | 8  | 4  | 6  | 7  | 14 | 13 | 10 | 16 | 12 | 11 | 19 | 17 | 21 | 22 | 18 | 23 | 28 | 27 | 26 | 20 | 25 | 24 | 29 |
| Mauritius                         | 2 | 1 | 4 | 3 | 6  | 11 | 5  | 13 | 7  | 9  | 8  | 16 | 17 | 14 | 12 | 10 | 19 | 18 | 20 | 23 | 21 | 15 | 22 | 27 | 25 | 24 | 29 | 26 | 28 |
| Myanmar                           | 1 | 3 | 5 | 4 | 11 | 14 | 8  | 10 | 7  | 6  | 9  | 2  | 13 | 16 | 15 | 12 | 21 | 19 | 20 | 25 | 23 | 17 | 18 | 27 | 24 | 22 | 28 | 26 | 29 |
| Philippines                       | 1 | 2 | 8 | 3 | 9  | 18 | 6  | 4  | 5  | 7  | 10 | 12 | 13 | 20 | 14 | 11 | 22 | 17 | 21 | 25 | 23 | 16 | 15 | 26 | 24 | 19 | 29 | 28 | 27 |
| Seychelles                        | 3 | 1 | 8 | 4 | 6  | 12 | 2  | 11 | 14 | 9  | 5  | 10 | 16 | 17 | 7  | 15 | 23 | 20 | 13 | 18 | 19 | 22 | 21 | 24 | 25 | 27 | 29 | 26 | 28 |
| Sri Lanka                         | 1 | 3 | 5 | 2 | 9  | 6  | 12 | 10 | 4  | 8  | 16 | 13 | 14 | 19 | 7  | 17 | 15 | 11 | 24 | 18 | 21 | 20 | 23 | 28 | 22 | 25 | 27 | 26 | 29 |
| Thailand                          | 2 | 3 | 5 | 4 | 8  | 12 | 11 | 1  | 9  | 7  | 10 | 16 | 14 | 17 | 13 | 15 | 6  | 20 | 18 | 25 | 23 | 22 | 19 | 26 | 21 | 24 | 27 | 28 | 29 |
| Timor-Leste                       | 1 | 2 | 4 | 3 | 10 | 13 | 7  | 5  | 8  | 6  | 9  | 12 | 11 | 18 | 15 | 14 | 19 | 21 | 20 | 25 | 24 | 17 | 16 | 27 | 23 | 22 | 28 | 26 | 29 |
| Viet Nam                          | 1 | 2 | 4 | 3 | 7  | 12 | 10 | 14 | 5  | 9  | 6  | 16 | 18 | 19 | 8  | 15 | 20 | 22 | 17 | 13 | 25 | 24 | 11 | 27 | 23 | 21 | 28 | 26 | 29 |
| <b>Sub-Saharan Africa</b>         | 4 | 6 | 7 | 1 | 11 | 8  | 3  | 10 | 5  | 9  | 2  | 12 | 13 | 15 | 16 | 14 | 21 | 18 | 17 | 26 | 19 | 20 | 22 | 24 | 27 | 25 | 28 | 23 | 29 |
| <b>Central sub-Saharan Africa</b> | 3 | 8 | 5 | 2 | 11 | 4  | 6  | 12 | 7  | 9  | 1  | 10 | 14 | 13 | 15 | 16 | 21 | 20 | 17 | 25 | 18 | 19 | 23 | 22 | 27 | 26 | 29 | 24 | 28 |
| Angola                            | 1 | 4 | 5 | 3 | 11 | 6  | 7  | 12 | 8  | 9  | 2  | 10 | 13 | 14 | 15 | 17 | 21 | 18 | 16 | 24 | 19 | 20 | 23 | 22 | 27 | 26 | 29 | 25 | 28 |

|                                    |   |   |    |   |    |    |    |    |    |    |   |    |    |    |    |    |    |    |    |    |    |    |    |    |    |    |    |    |    |
|------------------------------------|---|---|----|---|----|----|----|----|----|----|---|----|----|----|----|----|----|----|----|----|----|----|----|----|----|----|----|----|----|
| Central African Republic           | 2 | 9 | 3  | 4 | 15 | 5  | 7  | 10 | 6  | 8  | 1 | 11 | 12 | 14 | 13 | 17 | 20 | 21 | 16 | 25 | 18 | 19 | 23 | 24 | 27 | 26 | 28 | 22 | 29 |
| Congo                              | 2 | 4 | 7  | 1 | 9  | 5  | 6  | 13 | 8  | 10 | 3 | 11 | 15 | 12 | 14 | 16 | 21 | 18 | 17 | 23 | 20 | 19 | 24 | 22 | 26 | 25 | 28 | 27 | 29 |
| Democratic Republic of the Congo   | 3 | 8 | 5  | 2 | 13 | 4  | 7  | 12 | 6  | 9  | 1 | 10 | 14 | 11 | 15 | 16 | 20 | 21 | 17 | 25 | 18 | 19 | 24 | 22 | 27 | 26 | 28 | 23 | 29 |
| Equatorial Guinea                  | 1 | 3 | 8  | 2 | 9  | 6  | 5  | 12 | 7  | 11 | 4 | 10 | 16 | 13 | 15 | 14 | 21 | 17 | 20 | 22 | 19 | 18 | 24 | 23 | 25 | 26 | 29 | 27 | 28 |
| Gabon                              | 1 | 3 | 7  | 2 | 8  | 5  | 4  | 13 | 9  | 12 | 6 | 10 | 17 | 11 | 14 | 15 | 21 | 16 | 18 | 22 | 19 | 20 | 24 | 23 | 25 | 26 | 28 | 27 | 29 |
| <b>Eastern sub-Saharan Africa</b>  | 9 | 6 | 7  | 3 | 12 | 4  | 5  | 10 | 2  | 8  | 1 | 11 | 14 | 16 | 15 | 13 | 22 | 18 | 19 | 26 | 21 | 20 | 17 | 25 | 27 | 24 | 28 | 23 | 29 |
| Burundi                            | 7 | 8 | 6  | 4 | 14 | 2  | 5  | 10 | 3  | 9  | 1 | 11 | 13 | 16 | 12 | 15 | 23 | 22 | 18 | 25 | 20 | 21 | 17 | 24 | 27 | 26 | 28 | 19 | 29 |
| Comoros                            | 7 | 5 | 8  | 3 | 9  | 2  | 4  | 13 | 6  | 10 | 1 | 12 | 16 | 15 | 14 | 11 | 22 | 18 | 21 | 26 | 20 | 17 | 19 | 23 | 27 | 24 | 28 | 25 | 29 |
| Djibouti                           | 6 | 7 | 8  | 4 | 10 | 2  | 3  | 12 | 5  | 9  | 1 | 11 | 15 | 16 | 14 | 13 | 23 | 17 | 19 | 22 | 21 | 20 | 18 | 24 | 27 | 26 | 29 | 25 | 28 |
| Eritrea                            | 7 | 6 | 5  | 2 | 14 | 3  | 8  | 11 | 4  | 9  | 1 | 10 | 15 | 16 | 13 | 12 | 23 | 22 | 19 | 25 | 24 | 18 | 17 | 21 | 27 | 26 | 28 | 20 | 29 |
| Ethiopia                           | 7 | 5 | 6  | 3 | 16 | 11 | 8  | 9  | 2  | 1  | 4 | 20 | 10 | 13 | 15 | 12 | 17 | 18 | 22 | 27 | 24 | 23 | 19 | 25 | 26 | 14 | 28 | 21 | 29 |
| Kenya                              | 8 | 6 | 3  | 2 | 13 | 1  | 4  | 12 | 7  | 11 | 5 | 9  | 15 | 20 | 10 | 14 | 19 | 22 | 17 | 21 | 18 | 24 | 16 | 25 | 26 | 27 | 28 | 23 | 29 |
| Madagascar                         | 8 | 7 | 6  | 2 | 13 | 3  | 5  | 11 | 4  | 9  | 1 | 10 | 15 | 16 | 14 | 12 | 24 | 22 | 19 | 25 | 23 | 18 | 17 | 21 | 27 | 26 | 28 | 20 | 29 |
| Malawi                             | 6 | 8 | 12 | 4 | 13 | 2  | 7  | 11 | 1  | 10 | 3 | 9  | 16 | 5  | 18 | 15 | 23 | 14 | 24 | 29 | 22 | 21 | 26 | 17 | 25 | 20 | 28 | 19 | 27 |
| Mozambique                         | 5 | 7 | 8  | 3 | 12 | 6  | 11 | 10 | 2  | 4  | 1 | 9  | 13 | 15 | 17 | 14 | 21 | 23 | 16 | 25 | 20 | 19 | 29 | 22 | 26 | 24 | 27 | 18 | 28 |
| Rwanda                             | 6 | 7 | 8  | 2 | 13 | 3  | 5  | 10 | 4  | 9  | 1 | 12 | 15 | 16 | 14 | 11 | 22 | 21 | 19 | 25 | 20 | 18 | 17 | 23 | 27 | 26 | 28 | 24 | 29 |
| Somalia                            | 8 | 9 | 4  | 5 | 18 | 2  | 7  | 10 | 3  | 6  | 1 | 12 | 11 | 15 | 13 | 14 | 22 | 25 | 19 | 26 | 21 | 20 | 16 | 23 | 27 | 24 | 28 | 17 | 29 |
| South Sudan                        | 6 | 5 | 8  | 7 | 12 | 2  | 3  | 11 | 4  | 9  | 1 | 10 | 14 | 13 | 15 | 16 | 24 | 17 | 20 | 23 | 21 | 19 | 18 | 25 | 27 | 26 | 29 | 22 | 28 |
| Uganda                             | 8 | 6 | 7  | 4 | 11 | 2  | 1  | 9  | 5  | 10 | 3 | 13 | 16 | 17 | 14 | 12 | 25 | 21 | 22 | 20 | 19 | 18 | 15 | 24 | 27 | 26 | 29 | 23 | 28 |
| United Republic of Tanzania        | 6 | 7 | 8  | 5 | 11 | 3  | 4  | 14 | 2  | 9  | 1 | 10 | 13 | 16 | 15 | 12 | 22 | 17 | 21 | 25 | 20 | 19 | 18 | 24 | 27 | 26 | 28 | 23 | 29 |
| Zambia                             | 6 | 5 | 8  | 4 | 11 | 2  | 7  | 14 | 3  | 9  | 1 | 10 | 15 | 16 | 13 | 12 | 24 | 17 | 19 | 23 | 21 | 20 | 18 | 25 | 27 | 26 | 29 | 22 | 28 |
| <b>Southern sub-Saharan Africa</b> | 1 | 6 | 8  | 3 | 9  | 5  | 2  | 7  | 10 | 12 | 4 | 11 | 17 | 14 | 15 | 13 | 22 | 20 | 18 | 24 | 16 | 19 | 26 | 21 | 23 | 27 | 25 | 28 | 29 |
| Botswana                           | 1 | 5 | 7  | 2 | 8  | 6  | 4  | 19 | 9  | 10 | 3 | 13 | 14 | 15 | 11 | 12 | 22 | 20 | 16 | 21 | 17 | 18 | 26 | 23 | 25 | 29 | 24 | 28 | 27 |
| Eswatini                           | 2 | 7 | 8  | 5 | 9  | 4  | 6  | 1  | 10 | 12 | 3 | 11 | 15 | 16 | 14 | 13 | 22 | 19 | 17 | 24 | 18 | 20 | 25 | 21 | 27 | 26 | 23 | 28 | 29 |
| Lesotho                            | 2 | 8 | 7  | 3 | 10 | 5  | 6  | 4  | 9  | 11 | 1 | 12 | 18 | 16 | 13 | 14 | 23 | 22 | 15 | 25 | 19 | 17 | 24 | 20 | 26 | 27 | 21 | 28 | 29 |
| Namibia                            | 5 | 4 | 11 | 1 | 9  | 15 | 2  | 10 | 6  | 13 | 3 | 8  | 17 | 18 | 7  | 16 | 24 | 19 | 14 | 20 | 22 | 21 | 26 | 12 | 25 | 28 | 23 | 27 | 29 |
| South Africa                       | 1 | 4 | 9  | 3 | 8  | 5  | 2  | 7  | 11 | 12 | 6 | 10 | 16 | 15 | 14 | 13 | 22 | 19 | 18 | 25 | 17 | 20 | 26 | 21 | 23 | 27 | 24 | 28 | 29 |
| Zimbabwe                           | 5 | 8 | 7  | 3 | 9  | 4  | 2  | 6  | 11 | 13 | 1 | 20 | 19 | 10 | 17 | 12 | 21 | 23 | 16 | 25 | 14 | 15 | 24 | 18 | 26 | 22 | 28 | 27 | 29 |
| <b>Western sub-Saharan Africa</b>  | 4 | 6 | 5  | 2 | 10 | 12 | 1  | 8  | 7  | 9  | 3 | 11 | 13 | 14 | 17 | 15 | 20 | 18 | 16 | 26 | 21 | 22 | 23 | 24 | 25 | 27 | 28 | 19 | 29 |
| Benin                              | 3 | 6 | 2  | 5 | 11 | 10 | 4  | 9  | 7  | 8  | 1 | 12 | 13 | 14 | 17 | 15 | 20 | 16 | 18 | 26 | 21 | 19 | 23 | 24 | 25 | 27 | 28 | 22 | 29 |
| Burkina Faso                       | 4 | 8 | 2  | 3 | 11 | 9  | 5  | 13 | 6  | 7  | 1 | 10 | 12 | 14 | 15 | 16 | 20 | 18 | 17 | 25 | 21 | 19 | 23 | 24 | 26 | 27 | 28 | 22 | 29 |
| Cabo Verde                         | 3 | 6 | 2  | 8 | 7  | 4  | 1  | 5  | 10 | 11 | 9 | 13 | 15 | 14 | 12 | 18 | 20 | 16 | 19 | 22 | 21 | 17 | 24 | 26 | 23 | 25 | 29 | 27 | 28 |
| Cameroon                           | 1 | 6 | 3  | 4 | 7  | 9  | 5  | 22 | 10 | 8  | 2 | 11 | 13 | 12 | 15 | 14 | 19 | 21 | 16 | 23 | 20 | 17 | 18 | 26 | 25 | 28 | 27 | 24 | 29 |
| Chad                               | 3 | 8 | 1  | 5 | 13 | 10 | 4  | 9  | 6  | 7  | 2 | 11 | 12 | 14 | 15 | 20 | 18 | 17 | 16 | 26 | 21 | 19 | 23 | 24 | 25 | 27 | 29 | 22 | 28 |

|                       |   |   |   |   |    |    |   |    |    |    |   |    |    |    |    |    |    |    |    |    |    |    |    |    |    |    |    |    |    |
|-----------------------|---|---|---|---|----|----|---|----|----|----|---|----|----|----|----|----|----|----|----|----|----|----|----|----|----|----|----|----|----|
| Côte d'Ivoire         | 2 | 6 | 1 | 5 | 11 | 9  | 4 | 10 | 7  | 8  | 3 | 12 | 13 | 14 | 16 | 15 | 20 | 18 | 17 | 24 | 21 | 19 | 23 | 25 | 26 | 27 | 28 | 22 | 29 |
| Gambia                | 3 | 5 | 7 | 4 | 10 | 11 | 8 | 1  | 6  | 9  | 2 | 16 | 15 | 13 | 14 | 12 | 17 | 18 | 21 | 25 | 20 | 19 | 27 | 24 | 23 | 26 | 29 | 22 | 28 |
| Ghana                 | 5 | 6 | 7 | 1 | 4  | 13 | 2 | 8  | 12 | 10 | 3 | 9  | 11 | 14 | 21 | 15 | 19 | 18 | 16 | 24 | 20 | 17 | 26 | 23 | 22 | 25 | 28 | 27 | 29 |
| Guinea                | 6 | 8 | 3 | 5 | 14 | 13 | 4 | 1  | 7  | 10 | 2 | 20 | 15 | 9  | 11 | 12 | 21 | 22 | 16 | 24 | 23 | 18 | 27 | 19 | 26 | 25 | 29 | 17 | 28 |
| Guinea-Bissau         | 4 | 6 | 2 | 3 | 11 | 10 | 5 | 8  | 7  | 9  | 1 | 12 | 13 | 14 | 16 | 15 | 19 | 20 | 17 | 25 | 21 | 18 | 23 | 24 | 27 | 26 | 28 | 22 | 29 |
| Liberia               | 5 | 6 | 2 | 4 | 10 | 9  | 3 | 7  | 8  | 11 | 1 | 12 | 14 | 13 | 16 | 15 | 20 | 18 | 17 | 26 | 21 | 19 | 23 | 24 | 25 | 27 | 28 | 22 | 29 |
| Mali                  | 6 | 7 | 1 | 4 | 11 | 12 | 9 | 2  | 8  | 10 | 3 | 18 | 13 | 5  | 15 | 16 | 19 | 14 | 17 | 26 | 21 | 20 | 27 | 22 | 25 | 24 | 29 | 23 | 28 |
| Mauritania            | 2 | 6 | 3 | 5 | 7  | 10 | 1 | 9  | 8  | 11 | 4 | 12 | 15 | 13 | 16 | 14 | 19 | 18 | 20 | 24 | 21 | 17 | 26 | 23 | 22 | 27 | 28 | 25 | 29 |
| Niger                 | 4 | 8 | 2 | 7 | 11 | 9  | 3 | 21 | 5  | 6  | 1 | 13 | 10 | 12 | 14 | 17 | 18 | 19 | 16 | 24 | 20 | 15 | 26 | 25 | 23 | 29 | 28 | 22 | 27 |
| Nigeria               | 5 | 4 | 9 | 2 | 8  | 19 | 1 | 10 | 6  | 7  | 3 | 12 | 11 | 18 | 21 | 13 | 22 | 16 | 15 | 27 | 20 | 24 | 17 | 23 | 25 | 26 | 28 | 14 | 29 |
| São Tomé and Príncipe | 1 | 5 | 3 | 6 | 13 | 8  | 7 | 14 | 2  | 11 | 4 | 12 | 21 | 9  | 20 | 10 | 15 | 17 | 18 | 22 | 19 | 16 | 26 | 25 | 24 | 23 | 27 | 28 | 29 |
| Senegal               | 3 | 6 | 2 | 4 | 10 | 8  | 1 | 13 | 7  | 9  | 5 | 11 | 14 | 12 | 16 | 15 | 20 | 19 | 18 | 26 | 21 | 17 | 25 | 24 | 23 | 27 | 28 | 22 | 29 |
| Sierra Leone          | 4 | 6 | 2 | 5 | 11 | 10 | 3 | 9  | 7  | 8  | 1 | 12 | 13 | 14 | 16 | 15 | 20 | 18 | 17 | 26 | 21 | 19 | 23 | 25 | 24 | 27 | 28 | 22 | 29 |
| Togo                  | 3 | 6 | 2 | 4 | 11 | 9  | 5 | 8  | 7  | 10 | 1 | 12 | 14 | 13 | 16 | 15 | 20 | 19 | 17 | 25 | 21 | 18 | 23 | 24 | 26 | 27 | 28 | 22 | 29 |

eFigure 11: Ranking of 29 cancer groups by mortality in 2019, by country and location group

Footnote: Cancer rankings by location compare the absolute number of deaths for each cancer, with colors ranging from the highest ranking (red) to the lowest ranking (green) within that location. Socio-demographic index (SDI) quintiles are ordered from high to low SDI quintile. Countries and location groups are ordered alphabetically by the GBD location hierarchy of 7 super-regions (bold, italicized) and 21 regions (bold).

| Location/grouping:<br><br><i>Global,</i><br>SDI quintile,<br><i>Super Region,</i><br>Region,<br>Country or Territory | Non-melanoma skin cancer | Tracheal, bronchus, and lung cancer | Colon and rectum cancer | Breast cancer | Prostate cancer | Stomach cancer | Other malignant neoplasms | Leukemia | Cervical cancer | Esophageal cancer | Liver cancer | Pancreatic cancer | Bladder cancer | Non-Hodgkin lymphoma | Uterine cancer | Lip and oral cavity cancer | Kidney cancer | Brain and central nervous system cancer | Ovarian cancer | Malignant skin melanoma | Thyroid cancer | Larynx cancer | Gallbladder and biliary tract cancer | Nasopharynx cancer | Other pharynx cancer | Multiple myeloma | Testicular cancer | Hodgkin lymphoma | Mesothelioma |
|----------------------------------------------------------------------------------------------------------------------|--------------------------|-------------------------------------|-------------------------|---------------|-----------------|----------------|---------------------------|----------|-----------------|-------------------|--------------|-------------------|----------------|----------------------|----------------|----------------------------|---------------|-----------------------------------------|----------------|-------------------------|----------------|---------------|--------------------------------------|--------------------|----------------------|------------------|-------------------|------------------|--------------|
| <b>Global</b>                                                                                                        | 1                        | 2                                   | 3                       | 4             | 5               | 6              | 7                         | 8        | 9               | 10                | 11           | 12                | 13             | 14                   | 15             | 16                         | 17            | 18                                      | 19             | 20                      | 21             | 22            | 23                                   | 24                 | 25                   | 26               | 27                | 28               | 29           |
| High SDI                                                                                                             | 1                        | 3                                   | 2                       | 5             | 4               | 6              | 7                         | 11       | 22              | 16                | 15           | 8                 | 10             | 12                   | 13             | 18                         | 14            | 17                                      | 19             | 9                       | 21             | 25            | 23                                   | 28                 | 24                   | 20               | 26                | 27               | 29           |
| High-middle SDI                                                                                                      | 3                        | 1                                   | 2                       | 4             | 6               | 5              | 7                         | 9        | 14              | 12                | 16           | 10                | 8              | 15                   | 11             | 19                         | 13            | 17                                      | 18             | 21                      | 22             | 23            | 24                                   | 20                 | 27                   | 26               | 25                | 28               | 29           |
| Middle SDI                                                                                                           | 5                        | 1                                   | 2                       | 3             | 6               | 4              | 7                         | 11       | 10              | 9                 | 8            | 12                | 13             | 14                   | 17             | 16                         | 20            | 15                                      | 18             | 27                      | 21             | 22            | 23                                   | 19                 | 24                   | 25               | 26                | 28               | 29           |
| Low-middle SDI                                                                                                       | 7                        | 2                                   | 3                       | 1             | 8               | 4              | 6                         | 10       | 5               | 11                | 12           | 14                | 19             | 15                   | 22             | 9                          | 23            | 17                                      | 16             | 28                      | 20             | 18            | 21                                   | 24                 | 13                   | 25               | 27                | 26               | 29           |
| Low SDI                                                                                                              | 11                       | 5                                   | 8                       | 1             | 7               | 6              | 3                         | 4        | 2               | 10                | 12           | 17                | 16             | 15                   | 21             | 9                          | 23            | 13                                      | 14             | 27                      | 19             | 18            | 22                                   | 25                 | 20                   | 26               | 28                | 24               | 29           |
| <b>Central Europe, Eastern Europe, and Central Asia</b>                                                              | 4                        | 2                                   | 1                       | 3             | 5               | 6              | 8                         | 13       | 12              | 21                | 19           | 11                | 9              | 16                   | 7              | 18                         | 10            | 17                                      | 14             | 15                      | 22             | 20            | 25                                   | 28                 | 23                   | 26               | 24                | 27               | 29           |
| <b>Central Asia</b>                                                                                                  | 1                        | 3                                   | 5                       | 2             | 12              | 4              | 7                         | 10       | 6               | 11                | 8            | 14                | 16             | 18                   | 9              | 19                         | 15            | 13                                      | 17             | 23                      | 21             | 20            | 26                                   | 28                 | 25                   | 27               | 22                | 24               | 29           |
| Armenia                                                                                                              | 3                        | 2                                   | 4                       | 1             | 5               | 6              | 11                        | 13       | 10              | 22                | 12           | 7                 | 8              | 18                   | 9              | 20                         | 15            | 14                                      | 16             | 24                      | 19             | 17            | 23                                   | 29                 | 28                   | 25               | 21                | 27               | 26           |
| Azerbaijan                                                                                                           | 2                        | 1                                   | 5                       | 3             | 8               | 4              | 12                        | 6        | 9               | 7                 | 16           | 11                | 15             | 19                   | 13             | 21                         | 10            | 14                                      | 17             | 25                      | 20             | 18            | 23                                   | 28                 | 27                   | 26               | 24                | 22               | 29           |
| Georgia                                                                                                              | 3                        | 2                                   | 4                       | 1             | 6               | 5              | 9                         | 12       | 10              | 23                | 19           | 11                | 8              | 17                   | 7              | 18                         | 13            | 15                                      | 14             | 21                      | 22             | 16            | 25                                   | 29                 | 26                   | 27               | 20                | 24               | 28           |
| Kazakhstan                                                                                                           | 1                        | 3                                   | 4                       | 2             | 9               | 5              | 7                         | 15       | 6               | 10                | 13           | 12                | 16             | 20                   | 8              | 17                         | 11            | 18                                      | 14             | 21                      | 19             | 22            | 26                                   | 28                 | 25                   | 27               | 23                | 24               | 29           |
| Kyrgyzstan                                                                                                           | 1                        | 4                                   | 6                       | 3             | 12              | 2              | 7                         | 10       | 5               | 13                | 18           | 9                 | 17             | 19                   | 8              | 16                         | 14            | 15                                      | 11             | 23                      | 20             | 22            | 24                                   | 28                 | 25                   | 26               | 21                | 27               | 29           |
| Mongolia                                                                                                             | 4                        | 3                                   | 8                       | 7             | 18              | 2              | 9                         | 12       | 6               | 5                 | 1            | 10                | 20             | 17                   | 13             | 16                         | 15            | 11                                      | 14             | 28                      | 21             | 22            | 19                                   | 25                 | 24                   | 23               | 27                | 26               | 29           |
| Tajikistan                                                                                                           | 1                        | 4                                   | 5                       | 3             | 14              | 2              | 8                         | 7        | 11              | 10                | 16           | 12                | 18             | 17                   | 9              | 19                         | 13            | 6                                       | 15             | 24                      | 26             | 20            | 25                                   | 23                 | 22                   | 21               | 29                | 27               | 28           |
| Turkmenistan                                                                                                         | 1                        | 4                                   | 8                       | 2             | 13              | 7              | 3                         | 10       | 5               | 6                 | 11           | 15                | 18             | 19                   | 22             | 14                         | 9             | 12                                      | 16             | 26                      | 20             | 24            | 27                                   | 28                 | 23                   | 25               | 17                | 21               | 29           |
| Uzbekistan                                                                                                           | 2                        | 4                                   | 6                       | 1             | 18              | 3              | 7                         | 8        | 5               | 12                | 11           | 15                | 19             | 13                   | 10             | 16                         | 14            | 9                                       | 17             | 25                      | 24             | 20            | 28                                   | 26                 | 22                   | 27               | 21                | 23               | 29           |
| <b>Central Europe</b>                                                                                                | 3                        | 2                                   | 1                       | 4             | 5               | 9              | 12                        | 11       | 14              | 24                | 21           | 7                 | 6              | 15                   | 8              | 18                         | 10            | 17                                      | 16             | 13                      | 25             | 19            | 22                                   | 28                 | 23                   | 26               | 20                | 27               | 29           |
| Albania                                                                                                              | 1                        | 2                                   | 5                       | 4             | 3               | 6              | 7                         | 10       | 14              | 23                | 8            | 9                 | 18             | 17                   | 12             | 20                         | 13            | 11                                      | 21             | 22                      | 19             | 15            | 25                                   | 28                 | 27                   | 26               | 16                | 24               | 29           |
| Bosnia and Herzegovina                                                                                               | 3                        | 1                                   | 2                       | 4             | 5               | 6              | 11                        | 14       | 15              | 22                | 10           | 8                 | 7              | 18                   | 9              | 20                         | 13            | 12                                      | 16             | 17                      | 23             | 19            | 21                                   | 28                 | 26                   | 25               | 24                | 27               | 29           |
| Bulgaria                                                                                                             | 1                        | 4                                   | 2                       | 3             | 5               | 8              | 11                        | 12       | 10              | 22                | 19           | 9                 | 7              | 18                   | 6              | 17                         | 15            | 13                                      | 14             | 20                      | 23             | 16            | 24                                   | 28                 | 25                   | 26               | 21                | 27               | 29           |
| Croatia                                                                                                              | 5                        | 2                                   | 1                       | 3             | 4               | 8              | 14                        | 9        | 18              | 25                | 21           | 10                | 6              | 15                   | 7              | 17                         | 11            | 13                                      | 16             | 12                      | 24             | 19            | 20                                   | 29                 | 26                   | 22               | 23                | 27               | 28           |

|                                  |    |   |   |   |    |    |    |    |    |    |    |    |    |    |    |    |    |    |    |    |    |    |    |    |    |    |    |    |    |
|----------------------------------|----|---|---|---|----|----|----|----|----|----|----|----|----|----|----|----|----|----|----|----|----|----|----|----|----|----|----|----|----|
| Czechia                          | 1  | 3 | 2 | 5 | 4  | 13 | 12 | 11 | 17 | 22 | 25 | 9  | 7  | 14 | 10 | 19 | 6  | 18 | 15 | 8  | 21 | 26 | 16 | 28 | 23 | 24 | 20 | 27 | 29 |
| Hungary                          | 3  | 2 | 1 | 4 | 5  | 8  | 13 | 10 | 16 | 23 | 25 | 7  | 6  | 15 | 11 | 12 | 9  | 20 | 17 | 14 | 24 | 19 | 21 | 28 | 18 | 26 | 22 | 27 | 29 |
| Montenegro                       | 4  | 1 | 3 | 2 | 5  | 11 | 17 | 8  | 15 | 24 | 14 | 7  | 6  | 18 | 9  | 20 | 13 | 12 | 19 | 16 | 22 | 10 | 25 | 28 | 27 | 26 | 21 | 23 | 29 |
| North Macedonia                  | 4  | 1 | 3 | 2 | 5  | 6  | 10 | 13 | 15 | 25 | 11 | 9  | 7  | 20 | 8  | 21 | 18 | 14 | 17 | 12 | 22 | 16 | 23 | 28 | 27 | 26 | 19 | 24 | 29 |
| Poland                           | 4  | 1 | 2 | 3 | 5  | 9  | 12 | 10 | 17 | 21 | 26 | 8  | 6  | 14 | 7  | 18 | 11 | 16 | 13 | 15 | 24 | 19 | 22 | 29 | 23 | 25 | 20 | 27 | 28 |
| Romania                          | 3  | 2 | 1 | 4 | 5  | 6  | 10 | 12 | 8  | 22 | 21 | 9  | 7  | 18 | 11 | 14 | 13 | 16 | 17 | 19 | 24 | 15 | 25 | 28 | 20 | 26 | 23 | 27 | 29 |
| Serbia                           | 4  | 1 | 2 | 3 | 5  | 9  | 10 | 13 | 11 | 23 | 18 | 8  | 6  | 17 | 7  | 20 | 14 | 12 | 19 | 15 | 25 | 16 | 22 | 28 | 24 | 27 | 21 | 26 | 29 |
| Slovakia                         | 3  | 2 | 1 | 4 | 5  | 7  | 11 | 13 | 15 | 24 | 25 | 8  | 6  | 14 | 9  | 16 | 10 | 20 | 17 | 12 | 26 | 23 | 18 | 28 | 21 | 22 | 19 | 27 | 29 |
| Slovenia                         | 1  | 4 | 2 | 5 | 3  | 7  | 14 | 8  | 21 | 25 | 15 | 10 | 12 | 9  | 13 | 20 | 11 | 19 | 16 | 6  | 26 | 24 | 17 | 29 | 18 | 22 | 23 | 27 | 28 |
| <b>Eastern Europe</b>            | 4  | 3 | 1 | 2 | 5  | 6  | 9  | 13 | 12 | 20 | 23 | 10 | 11 | 16 | 7  | 17 | 8  | 18 | 14 | 15 | 19 | 21 | 27 | 28 | 22 | 26 | 24 | 25 | 29 |
| Belarus                          | 5  | 4 | 1 | 3 | 2  | 6  | 8  | 10 | 12 | 21 | 23 | 11 | 14 | 17 | 9  | 16 | 7  | 20 | 15 | 13 | 19 | 18 | 27 | 28 | 22 | 24 | 26 | 25 | 29 |
| Estonia                          | 5  | 4 | 2 | 3 | 1  | 6  | 12 | 13 | 15 | 23 | 19 | 9  | 10 | 14 | 7  | 18 | 8  | 17 | 16 | 11 | 22 | 21 | 25 | 28 | 24 | 20 | 26 | 27 | 29 |
| Latvia                           | 5  | 4 | 1 | 3 | 2  | 7  | 12 | 11 | 17 | 19 | 23 | 10 | 9  | 15 | 6  | 18 | 8  | 16 | 14 | 13 | 20 | 21 | 26 | 28 | 24 | 22 | 25 | 27 | 29 |
| Lithuania                        | 3  | 4 | 2 | 5 | 1  | 6  | 11 | 12 | 15 | 18 | 21 | 8  | 10 | 16 | 9  | 19 | 7  | 17 | 13 | 14 | 23 | 22 | 25 | 28 | 24 | 20 | 26 | 27 | 29 |
| Republic of Moldova              | 2  | 4 | 1 | 3 | 5  | 6  | 10 | 13 | 9  | 23 | 21 | 8  | 11 | 15 | 7  | 19 | 12 | 17 | 16 | 20 | 22 | 14 | 27 | 28 | 18 | 26 | 25 | 24 | 29 |
| Russian Federation               | 4  | 3 | 1 | 2 | 5  | 7  | 8  | 13 | 12 | 18 | 23 | 10 | 11 | 17 | 6  | 21 | 9  | 20 | 14 | 15 | 16 | 22 | 26 | 28 | 19 | 27 | 24 | 25 | 29 |
| Ukraine                          | 3  | 2 | 1 | 4 | 6  | 5  | 10 | 12 | 13 | 22 | 23 | 9  | 11 | 18 | 8  | 14 | 7  | 17 | 15 | 16 | 20 | 19 | 26 | 28 | 21 | 25 | 27 | 24 | 29 |
| <b>High-income</b>               | 1  | 3 | 2 | 5 | 4  | 6  | 8  | 10 | 21 | 17 | 15 | 9  | 7  | 12 | 13 | 19 | 14 | 16 | 18 | 11 | 22 | 24 | 23 | 29 | 25 | 20 | 26 | 27 | 28 |
| <b>Australasia</b>               | 1  | 6 | 3 | 4 | 2  | 12 | 13 | 8  | 22 | 17 | 18 | 9  | 10 | 7  | 14 | 20 | 11 | 16 | 19 | 5  | 21 | 25 | 26 | 29 | 28 | 15 | 23 | 27 | 24 |
| Australia                        | 1  | 6 | 3 | 4 | 2  | 12 | 13 | 8  | 22 | 17 | 18 | 10 | 9  | 7  | 15 | 21 | 11 | 16 | 19 | 5  | 20 | 25 | 26 | 29 | 28 | 14 | 23 | 27 | 24 |
| New Zealand                      | 1  | 6 | 2 | 4 | 3  | 14 | 13 | 8  | 21 | 17 | 18 | 10 | 11 | 7  | 12 | 19 | 9  | 16 | 20 | 5  | 24 | 26 | 23 | 29 | 28 | 15 | 22 | 27 | 25 |
| <b>High-income Asia Pacific</b>  | 14 | 2 | 1 | 4 | 5  | 3  | 11 | 12 | 19 | 13 | 6  | 7  | 9  | 8  | 15 | 23 | 16 | 17 | 20 | 27 | 18 | 24 | 10 | 26 | 25 | 22 | 28 | 21 | 29 |
| Brunei Darussalam                | 19 | 3 | 2 | 1 | 11 | 5  | 8  | 9  | 4  | 24 | 7  | 12 | 17 | 6  | 18 | 20 | 15 | 13 | 10 | 28 | 16 | 27 | 22 | 14 | 25 | 23 | 26 | 21 | 29 |
| Japan                            | 14 | 2 | 1 | 4 | 5  | 3  | 11 | 12 | 18 | 13 | 6  | 7  | 9  | 8  | 15 | 23 | 16 | 17 | 20 | 26 | 19 | 25 | 10 | 27 | 24 | 22 | 28 | 21 | 29 |
| Republic of Korea                | 14 | 2 | 1 | 5 | 6  | 3  | 10 | 11 | 16 | 18 | 4  | 7  | 9  | 12 | 21 | 25 | 17 | 15 | 19 | 24 | 13 | 20 | 8  | 27 | 26 | 22 | 28 | 23 | 29 |
| Singapore                        | 8  | 3 | 1 | 2 | 4  | 7  | 9  | 10 | 17 | 20 | 6  | 12 | 14 | 11 | 13 | 23 | 15 | 16 | 19 | 26 | 18 | 22 | 25 | 5  | 27 | 24 | 28 | 21 | 29 |
| <b>High-income North America</b> | 1  | 3 | 5 | 4 | 2  | 14 | 7  | 12 | 22 | 21 | 17 | 11 | 13 | 9  | 8  | 15 | 10 | 16 | 19 | 6  | 20 | 23 | 27 | 29 | 24 | 18 | 25 | 26 | 28 |
| Canada                           | 1  | 3 | 2 | 4 | 5  | 14 | 6  | 8  | 20 | 18 | 17 | 11 | 10 | 7  | 13 | 21 | 12 | 15 | 19 | 9  | 22 | 23 | 26 | 29 | 27 | 16 | 24 | 25 | 28 |
| Greenland                        | 1  | 2 | 3 | 4 | 8  | 9  | 11 | 20 | 10 | 6  | 14 | 5  | 12 | 17 | 26 | 15 | 7  | 18 | 13 | 25 | 23 | 22 | 24 | 16 | 19 | 21 | 27 | 29 | 28 |
| United States of America         | 1  | 3 | 5 | 4 | 2  | 14 | 8  | 12 | 22 | 21 | 17 | 11 | 13 | 10 | 7  | 15 | 9  | 16 | 19 | 6  | 20 | 23 | 27 | 29 | 24 | 18 | 25 | 26 | 28 |
| <b>Southern Latin America</b>    | 1  | 4 | 2 | 3 | 5  | 6  | 10 | 12 | 7  | 16 | 25 | 8  | 11 | 13 | 17 | 23 | 9  | 19 | 18 | 20 | 24 | 22 | 14 | 29 | 27 | 21 | 15 | 26 | 28 |
| Argentina                        | 3  | 4 | 1 | 2 | 5  | 8  | 10 | 12 | 6  | 14 | 25 | 7  | 11 | 13 | 17 | 22 | 9  | 19 | 16 | 21 | 24 | 20 | 18 | 29 | 27 | 23 | 15 | 26 | 28 |
| Chile                            | 1  | 6 | 3 | 4 | 2  | 5  | 11 | 15 | 9  | 17 | 23 | 12 | 13 | 14 | 16 | 24 | 10 | 21 | 18 | 20 | 22 | 25 | 7  | 29 | 27 | 19 | 8  | 26 | 28 |
| Uruguay                          | 3  | 4 | 1 | 2 | 5  | 7  | 12 | 13 | 10 | 14 | 24 | 6  | 9  | 11 | 17 | 19 | 8  | 21 | 16 | 20 | 25 | 18 | 15 | 28 | 26 | 22 | 23 | 27 | 29 |

|                                    |    |   |   |   |   |    |    |    |    |    |    |    |    |    |    |    |    |    |    |    |    |    |    |    |    |    |    |    |    |
|------------------------------------|----|---|---|---|---|----|----|----|----|----|----|----|----|----|----|----|----|----|----|----|----|----|----|----|----|----|----|----|----|
| <b>Western Europe</b>              | 2  | 5 | 1 | 3 | 4 | 12 | 8  | 7  | 21 | 19 | 16 | 10 | 6  | 11 | 13 | 18 | 14 | 15 | 17 | 9  | 22 | 23 | 25 | 29 | 24 | 20 | 26 | 27 | 28 |
| Andorra                            | 2  | 4 | 1 | 3 | 5 | 11 | 7  | 6  | 17 | 21 | 13 | 15 | 9  | 8  | 14 | 18 | 16 | 10 | 23 | 12 | 20 | 24 | 22 | 29 | 26 | 19 | 25 | 27 | 28 |
| Austria                            | 3  | 5 | 2 | 4 | 1 | 12 | 10 | 7  | 22 | 23 | 15 | 8  | 6  | 11 | 13 | 18 | 14 | 17 | 16 | 9  | 19 | 26 | 25 | 29 | 21 | 20 | 24 | 27 | 28 |
| Belgium                            | 4  | 3 | 2 | 1 | 5 | 13 | 8  | 7  | 21 | 16 | 20 | 11 | 6  | 10 | 12 | 17 | 14 | 15 | 18 | 9  | 24 | 22 | 28 | 29 | 23 | 19 | 25 | 27 | 26 |
| Cyprus                             | 4  | 5 | 3 | 1 | 2 | 11 | 8  | 7  | 19 | 26 | 17 | 13 | 6  | 10 | 9  | 20 | 16 | 14 | 15 | 12 | 21 | 22 | 23 | 28 | 29 | 18 | 24 | 25 | 27 |
| Denmark                            | 2  | 3 | 1 | 5 | 4 | 15 | 13 | 9  | 23 | 17 | 21 | 10 | 6  | 11 | 12 | 18 | 14 | 8  | 16 | 7  | 26 | 24 | 25 | 29 | 20 | 19 | 22 | 27 | 28 |
| Finland                            | 2  | 5 | 4 | 3 | 1 | 15 | 9  | 14 | 23 | 20 | 16 | 7  | 13 | 8  | 11 | 19 | 10 | 12 | 17 | 6  | 21 | 27 | 22 | 29 | 26 | 18 | 25 | 24 | 28 |
| France                             | 1  | 4 | 2 | 3 | 5 | 14 | 8  | 7  | 23 | 19 | 15 | 10 | 6  | 11 | 12 | 17 | 13 | 16 | 18 | 9  | 25 | 22 | 28 | 29 | 20 | 21 | 24 | 27 | 26 |
| Germany                            | 5  | 4 | 1 | 3 | 2 | 11 | 8  | 6  | 23 | 15 | 16 | 7  | 9  | 13 | 14 | 19 | 12 | 20 | 17 | 10 | 24 | 26 | 21 | 29 | 22 | 18 | 25 | 27 | 28 |
| Greece                             | 1  | 2 | 4 | 3 | 5 | 8  | 11 | 7  | 21 | 26 | 19 | 9  | 6  | 15 | 12 | 22 | 13 | 10 | 16 | 14 | 25 | 17 | 24 | 27 | 28 | 20 | 23 | 18 | 29 |
| Iceland                            | 2  | 3 | 5 | 4 | 1 | 14 | 9  | 11 | 22 | 17 | 21 | 12 | 7  | 13 | 16 | 20 | 8  | 10 | 19 | 6  | 15 | 24 | 25 | 29 | 26 | 18 | 28 | 23 | 27 |
| Ireland                            | 1  | 5 | 2 | 3 | 4 | 14 | 10 | 7  | 19 | 16 | 21 | 12 | 8  | 9  | 11 | 20 | 15 | 13 | 17 | 6  | 22 | 25 | 27 | 28 | 26 | 18 | 23 | 24 | 29 |
| Israel                             | 1  | 4 | 3 | 2 | 5 | 14 | 11 | 6  | 19 | 25 | 20 | 10 | 8  | 7  | 13 | 21 | 15 | 12 | 16 | 9  | 18 | 24 | 26 | 27 | 29 | 17 | 23 | 22 | 28 |
| Italy                              | 1  | 5 | 2 | 3 | 4 | 9  | 7  | 8  | 23 | 25 | 15 | 11 | 6  | 12 | 10 | 21 | 13 | 18 | 19 | 14 | 17 | 22 | 20 | 29 | 27 | 16 | 24 | 26 | 28 |
| Luxembourg                         | 1  | 4 | 3 | 2 | 5 | 14 | 9  | 8  | 25 | 19 | 17 | 12 | 6  | 13 | 10 | 16 | 18 | 11 | 15 | 7  | 21 | 24 | 28 | 27 | 23 | 20 | 22 | 26 | 29 |
| Malta                              | 1  | 5 | 3 | 2 | 4 | 12 | 8  | 9  | 26 | 22 | 21 | 7  | 6  | 10 | 11 | 17 | 13 | 15 | 16 | 14 | 18 | 23 | 29 | 24 | 28 | 20 | 19 | 25 | 27 |
| Monaco                             | 5  | 1 | 3 | 2 | 4 | 13 | 11 | 9  | 24 | 19 | 16 | 8  | 7  | 6  | 21 | 25 | 15 | 18 | 14 | 12 | 22 | 17 | 28 | 29 | 27 | 10 | 20 | 23 | 26 |
| Netherlands                        | 5  | 4 | 1 | 2 | 3 | 13 | 8  | 10 | 23 | 15 | 20 | 11 | 7  | 9  | 12 | 19 | 14 | 16 | 17 | 6  | 21 | 26 | 25 | 29 | 27 | 18 | 22 | 28 | 24 |
| Norway                             | 3  | 4 | 2 | 5 | 1 | 15 | 8  | 14 | 20 | 22 | 23 | 10 | 7  | 12 | 13 | 19 | 11 | 9  | 16 | 6  | 18 | 27 | 24 | 29 | 25 | 17 | 21 | 26 | 28 |
| Portugal                           | 3  | 5 | 1 | 4 | 2 | 7  | 9  | 8  | 18 | 20 | 17 | 12 | 6  | 11 | 10 | 13 | 15 | 16 | 23 | 14 | 19 | 25 | 24 | 28 | 21 | 22 | 26 | 27 | 29 |
| San Marino                         | 3  | 5 | 1 | 4 | 2 | 6  | 10 | 8  | 24 | 26 | 22 | 13 | 7  | 9  | 23 | 18 | 16 | 12 | 21 | 11 | 15 | 19 | 20 | 25 | 28 | 14 | 27 | 17 | 29 |
| Spain                              | 2  | 4 | 1 | 3 | 5 | 8  | 9  | 7  | 21 | 22 | 16 | 11 | 6  | 12 | 10 | 15 | 14 | 17 | 18 | 13 | 24 | 19 | 23 | 28 | 25 | 20 | 27 | 26 | 29 |
| Sweden                             | 1  | 5 | 3 | 4 | 2 | 15 | 9  | 8  | 22 | 19 | 20 | 11 | 7  | 10 | 12 | 18 | 14 | 13 | 16 | 6  | 24 | 26 | 21 | 29 | 25 | 17 | 23 | 27 | 28 |
| Switzerland                        | 1  | 5 | 4 | 3 | 2 | 12 | 7  | 8  | 24 | 20 | 16 | 10 | 9  | 11 | 13 | 18 | 15 | 14 | 19 | 6  | 21 | 26 | 25 | 29 | 22 | 17 | 23 | 28 | 27 |
| United Kingdom                     | 1  | 4 | 2 | 3 | 5 | 15 | 11 | 9  | 21 | 14 | 19 | 10 | 7  | 8  | 13 | 17 | 12 | 20 | 16 | 6  | 25 | 23 | 28 | 29 | 22 | 18 | 26 | 27 | 24 |
| <b>Latin America and Caribbean</b> | 1  | 5 | 4 | 3 | 2 | 6  | 8  | 9  | 7  | 17 | 18 | 10 | 16 | 11 | 12 | 19 | 14 | 13 | 15 | 24 | 20 | 22 | 21 | 29 | 26 | 23 | 25 | 27 | 28 |
| <b>Andean Latin America</b>        | 4  | 8 | 3 | 6 | 2 | 1  | 7  | 9  | 5  | 23 | 18 | 12 | 19 | 10 | 11 | 22 | 17 | 14 | 15 | 24 | 16 | 25 | 13 | 29 | 27 | 21 | 20 | 26 | 28 |
| Bolivia (Plurinational State of)   | 5  | 7 | 6 | 4 | 3 | 1  | 9  | 8  | 2  | 20 | 14 | 13 | 19 | 12 | 11 | 22 | 18 | 15 | 17 | 23 | 16 | 24 | 10 | 29 | 28 | 21 | 25 | 26 | 27 |
| Ecuador                            | 1  | 8 | 4 | 5 | 3 | 2  | 7  | 9  | 6  | 24 | 18 | 12 | 19 | 10 | 11 | 22 | 17 | 15 | 14 | 23 | 13 | 26 | 16 | 29 | 27 | 21 | 20 | 25 | 28 |
| Peru                               | 4  | 8 | 2 | 6 | 1 | 3  | 5  | 9  | 7  | 23 | 18 | 11 | 19 | 10 | 12 | 22 | 16 | 13 | 15 | 24 | 17 | 25 | 14 | 29 | 27 | 21 | 20 | 26 | 28 |
| <b>Caribbean</b>                   | 8  | 4 | 3 | 2 | 1 | 9  | 6  | 10 | 5  | 16 | 19 | 13 | 11 | 12 | 7  | 15 | 17 | 21 | 20 | 26 | 22 | 14 | 23 | 27 | 24 | 18 | 28 | 25 | 29 |
| Antigua and Barbuda                | 9  | 7 | 3 | 2 | 1 | 5  | 6  | 11 | 4  | 18 | 21 | 10 | 14 | 12 | 8  | 19 | 16 | 20 | 13 | 23 | 17 | 22 | 24 | 27 | 25 | 15 | 26 | 28 | 29 |
| Bahamas                            | 11 | 4 | 3 | 2 | 1 | 7  | 6  | 15 | 5  | 13 | 19 | 16 | 20 | 12 | 8  | 14 | 17 | 22 | 9  | 25 | 21 | 18 | 24 | 27 | 23 | 10 | 29 | 26 | 28 |
| Barbados                           | 12 | 8 | 3 | 2 | 1 | 7  | 6  | 13 | 4  | 14 | 19 | 11 | 15 | 10 | 5  | 18 | 16 | 21 | 17 | 25 | 20 | 22 | 23 | 26 | 24 | 9  | 28 | 27 | 29 |



|                                     |    |   |    |   |    |    |   |    |    |    |    |    |    |    |    |    |    |    |    |    |    |    |    |    |    |    |    |    |    |
|-------------------------------------|----|---|----|---|----|----|---|----|----|----|----|----|----|----|----|----|----|----|----|----|----|----|----|----|----|----|----|----|----|
| Belize                              | 8  | 5 | 4  | 3 | 1  | 6  | 7 | 10 | 2  | 18 | 15 | 11 | 14 | 13 | 9  | 19 | 12 | 16 | 17 | 25 | 21 | 20 | 22 | 29 | 26 | 24 | 27 | 23 | 28 |
| Bermuda                             | 11 | 4 | 2  | 3 | 1  | 10 | 7 | 13 | 19 | 16 | 23 | 6  | 5  | 9  | 8  | 18 | 14 | 20 | 15 | 12 | 22 | 21 | 26 | 27 | 24 | 17 | 29 | 25 | 28 |
| Cuba                                | 5  | 2 | 3  | 4 | 1  | 11 | 7 | 15 | 10 | 16 | 22 | 12 | 8  | 13 | 6  | 14 | 17 | 18 | 20 | 25 | 21 | 9  | 26 | 28 | 24 | 19 | 27 | 23 | 29 |
| Dominica                            | 12 | 5 | 3  | 2 | 1  | 4  | 7 | 11 | 6  | 15 | 18 | 9  | 13 | 8  | 14 | 16 | 17 | 24 | 20 | 26 | 23 | 19 | 22 | 27 | 21 | 10 | 29 | 25 | 28 |
| Dominican Republic                  | 9  | 4 | 3  | 2 | 1  | 7  | 6 | 10 | 5  | 19 | 11 | 15 | 20 | 14 | 8  | 13 | 12 | 24 | 23 | 26 | 17 | 18 | 16 | 25 | 22 | 21 | 28 | 27 | 29 |
| Grenada                             | 12 | 6 | 3  | 2 | 1  | 8  | 9 | 14 | 4  | 11 | 20 | 10 | 15 | 7  | 5  | 16 | 18 | 21 | 13 | 25 | 19 | 24 | 22 | 26 | 23 | 17 | 29 | 27 | 28 |
| Guyana                              | 10 | 5 | 4  | 2 | 1  | 6  | 8 | 12 | 3  | 19 | 15 | 11 | 17 | 14 | 7  | 16 | 13 | 20 | 9  | 26 | 18 | 21 | 23 | 29 | 25 | 22 | 27 | 24 | 28 |
| Haiti                               | 9  | 6 | 7  | 2 | 3  | 5  | 8 | 4  | 1  | 14 | 13 | 20 | 16 | 11 | 10 | 15 | 21 | 12 | 18 | 26 | 23 | 19 | 22 | 27 | 25 | 17 | 29 | 24 | 28 |
| Jamaica                             | 10 | 4 | 3  | 2 | 1  | 6  | 8 | 11 | 5  | 18 | 17 | 12 | 15 | 9  | 7  | 22 | 19 | 20 | 14 | 25 | 16 | 21 | 23 | 26 | 24 | 13 | 28 | 27 | 29 |
| Puerto Rico                         | 7  | 4 | 2  | 3 | 1  | 10 | 5 | 12 | 14 | 18 | 17 | 8  | 11 | 6  | 9  | 19 | 15 | 20 | 16 | 23 | 21 | 22 | 27 | 28 | 26 | 13 | 25 | 24 | 29 |
| Saint Kitts and Nevis               | 11 | 6 | 3  | 2 | 1  | 8  | 5 | 13 | 4  | 17 | 20 | 9  | 12 | 10 | 7  | 18 | 14 | 22 | 15 | 28 | 19 | 21 | 23 | 26 | 24 | 16 | 25 | 29 | 27 |
| Saint Lucia                         | 11 | 5 | 3  | 2 | 1  | 6  | 7 | 14 | 4  | 17 | 21 | 8  | 12 | 9  | 10 | 16 | 19 | 22 | 15 | 23 | 18 | 20 | 25 | 28 | 24 | 13 | 27 | 26 | 29 |
| Saint Vincent and the Grenadines    | 10 | 6 | 4  | 2 | 1  | 5  | 8 | 13 | 3  | 20 | 18 | 12 | 15 | 9  | 7  | 11 | 19 | 22 | 14 | 25 | 17 | 16 | 24 | 27 | 23 | 21 | 28 | 26 | 29 |
| Suriname                            | 9  | 5 | 3  | 2 | 1  | 7  | 6 | 10 | 4  | 21 | 17 | 8  | 16 | 12 | 14 | 19 | 15 | 13 | 11 | 26 | 20 | 23 | 22 | 24 | 27 | 18 | 28 | 25 | 29 |
| Trinidad and Tobago                 | 9  | 5 | 3  | 2 | 1  | 11 | 6 | 13 | 4  | 20 | 17 | 8  | 16 | 12 | 7  | 18 | 15 | 21 | 10 | 27 | 19 | 23 | 22 | 28 | 24 | 14 | 25 | 26 | 29 |
| United States Virgin Islands        | 14 | 4 | 2  | 3 | 1  | 6  | 7 | 15 | 9  | 16 | 22 | 5  | 17 | 11 | 12 | 18 | 13 | 19 | 10 | 21 | 25 | 20 | 24 | 26 | 23 | 8  | 29 | 28 | 27 |
| <b>Central Latin America</b>        | 1  | 7 | 4  | 3 | 2  | 5  | 8 | 9  | 6  | 23 | 15 | 10 | 18 | 12 | 14 | 21 | 11 | 17 | 13 | 25 | 16 | 24 | 19 | 29 | 27 | 22 | 20 | 26 | 28 |
| Colombia                            | 1  | 6 | 4  | 3 | 2  | 5  | 7 | 9  | 8  | 21 | 19 | 11 | 18 | 10 | 14 | 23 | 16 | 13 | 12 | 20 | 15 | 25 | 17 | 28 | 27 | 22 | 24 | 26 | 29 |
| Costa Rica                          | 2  | 7 | 4  | 3 | 1  | 5  | 6 | 10 | 8  | 25 | 13 | 11 | 15 | 9  | 12 | 22 | 14 | 17 | 18 | 19 | 16 | 26 | 24 | 28 | 27 | 20 | 23 | 21 | 29 |
| El Salvador                         | 1  | 7 | 6  | 4 | 2  | 3  | 8 | 9  | 5  | 21 | 18 | 10 | 19 | 13 | 11 | 20 | 16 | 12 | 14 | 26 | 17 | 23 | 15 | 28 | 27 | 24 | 25 | 22 | 29 |
| Guatemala                           | 1  | 8 | 6  | 5 | 3  | 2  | 9 | 7  | 4  | 18 | 10 | 11 | 22 | 16 | 12 | 21 | 15 | 13 | 14 | 26 | 17 | 23 | 19 | 28 | 27 | 24 | 20 | 25 | 29 |
| Honduras                            | 1  | 2 | 10 | 4 | 3  | 5  | 8 | 9  | 7  | 22 | 6  | 13 | 20 | 17 | 12 | 18 | 16 | 15 | 14 | 26 | 11 | 23 | 19 | 29 | 24 | 21 | 27 | 28 | 25 |
| Mexico                              | 1  | 8 | 4  | 3 | 2  | 6  | 7 | 9  | 5  | 24 | 14 | 10 | 20 | 13 | 15 | 21 | 11 | 18 | 12 | 23 | 16 | 25 | 19 | 29 | 28 | 22 | 17 | 26 | 27 |
| Nicaragua                           | 2  | 8 | 5  | 3 | 1  | 6  | 7 | 9  | 4  | 23 | 12 | 10 | 19 | 11 | 17 | 21 | 14 | 15 | 13 | 26 | 18 | 20 | 16 | 28 | 27 | 24 | 22 | 25 | 29 |
| Panama                              | 3  | 7 | 4  | 2 | 1  | 5  | 8 | 9  | 6  | 21 | 16 | 12 | 18 | 11 | 10 | 19 | 13 | 14 | 15 | 25 | 17 | 22 | 23 | 28 | 26 | 20 | 24 | 27 | 29 |
| Venezuela (Bolivarian Republic of)  | 2  | 4 | 6  | 3 | 1  | 7  | 8 | 9  | 5  | 23 | 20 | 10 | 15 | 13 | 11 | 18 | 12 | 19 | 14 | 25 | 17 | 16 | 22 | 28 | 27 | 21 | 26 | 24 | 29 |
| <b>Tropical Latin America</b>       | 1  | 5 | 4  | 3 | 2  | 6  | 8 | 12 | 7  | 11 | 21 | 9  | 14 | 16 | 15 | 13 | 17 | 10 | 18 | 23 | 25 | 19 | 20 | 29 | 24 | 22 | 26 | 27 | 28 |
| Brazil                              | 1  | 5 | 4  | 3 | 2  | 6  | 8 | 12 | 7  | 11 | 21 | 9  | 13 | 16 | 15 | 14 | 17 | 10 | 18 | 23 | 25 | 19 | 20 | 29 | 24 | 22 | 26 | 27 | 28 |
| Paraguay                            | 24 | 5 | 4  | 1 | 2  | 7  | 6 | 8  | 3  | 12 | 21 | 9  | 18 | 11 | 10 | 16 | 13 | 17 | 14 | 23 | 15 | 20 | 22 | 29 | 26 | 25 | 19 | 27 | 28 |
| <b>North Africa and Middle East</b> | 9  | 2 | 3  | 1 | 5  | 6  | 4 | 8  | 16 | 20 | 10 | 13 | 7  | 12 | 18 | 23 | 15 | 11 | 17 | 27 | 14 | 19 | 22 | 24 | 28 | 25 | 21 | 26 | 29 |
| <b>North Africa and Middle East</b> | 9  | 2 | 3  | 1 | 5  | 6  | 4 | 8  | 16 | 20 | 10 | 13 | 7  | 12 | 18 | 23 | 15 | 11 | 17 | 27 | 14 | 19 | 22 | 24 | 28 | 25 | 21 | 26 | 29 |
| Afghanistan                         | 12 | 6 | 9  | 4 | 13 | 1  | 2 | 3  | 10 | 11 | 7  | 18 | 14 | 5  | 22 | 23 | 19 | 8  | 17 | 26 | 16 | 15 | 20 | 25 | 27 | 24 | 28 | 21 | 29 |
| Algeria                             | 6  | 4 | 3  | 1 | 5  | 11 | 2 | 12 | 8  | 25 | 19 | 14 | 13 | 7  | 24 | 22 | 17 | 16 | 18 | 28 | 9  | 21 | 15 | 10 | 27 | 23 | 26 | 20 | 29 |
| Bahrain                             | 10 | 4 | 3  | 1 | 2  | 13 | 5 | 7  | 18 | 22 | 16 | 9  | 6  | 8  | 17 | 19 | 11 | 14 | 12 | 26 | 15 | 23 | 24 | 25 | 28 | 21 | 27 | 20 | 29 |

|                                               |    |   |   |   |    |    |   |    |    |    |    |    |    |    |    |    |    |    |    |    |    |    |    |    |    |    |    |    |    |
|-----------------------------------------------|----|---|---|---|----|----|---|----|----|----|----|----|----|----|----|----|----|----|----|----|----|----|----|----|----|----|----|----|----|
| Egypt                                         | 9  | 6 | 5 | 3 | 8  | 10 | 4 | 7  | 19 | 18 | 1  | 12 | 2  | 14 | 16 | 23 | 15 | 11 | 17 | 27 | 13 | 20 | 22 | 28 | 26 | 21 | 24 | 25 | 29 |
| Iran (Islamic Republic of)                    | 7  | 6 | 5 | 1 | 4  | 2  | 3 | 8  | 20 | 13 | 15 | 11 | 10 | 14 | 21 | 23 | 16 | 9  | 18 | 26 | 12 | 17 | 25 | 27 | 28 | 24 | 19 | 22 | 29 |
| Iraq                                          | 14 | 2 | 7 | 1 | 8  | 10 | 3 | 4  | 19 | 22 | 9  | 11 | 5  | 15 | 16 | 20 | 13 | 6  | 17 | 28 | 12 | 18 | 25 | 26 | 27 | 24 | 21 | 23 | 29 |
| Jordan                                        | 8  | 3 | 2 | 1 | 6  | 11 | 4 | 5  | 18 | 25 | 19 | 13 | 9  | 7  | 14 | 20 | 15 | 10 | 17 | 27 | 12 | 24 | 21 | 23 | 28 | 22 | 16 | 26 | 29 |
| Kuwait                                        | 10 | 6 | 2 | 1 | 4  | 15 | 3 | 7  | 18 | 21 | 17 | 14 | 5  | 8  | 13 | 20 | 12 | 11 | 16 | 27 | 9  | 24 | 25 | 26 | 28 | 23 | 19 | 22 | 29 |
| Lebanon                                       | 8  | 5 | 4 | 1 | 2  | 10 | 6 | 7  | 22 | 27 | 19 | 13 | 3  | 15 | 11 | 23 | 18 | 12 | 14 | 25 | 9  | 17 | 24 | 26 | 28 | 20 | 21 | 16 | 29 |
| Libya                                         | 19 | 2 | 3 | 1 | 6  | 11 | 4 | 7  | 12 | 25 | 13 | 8  | 5  | 16 | 20 | 23 | 15 | 10 | 17 | 27 | 14 | 18 | 22 | 9  | 28 | 24 | 26 | 21 | 29 |
| Morocco                                       | 13 | 2 | 3 | 1 | 6  | 9  | 5 | 15 | 4  | 22 | 20 | 14 | 11 | 7  | 17 | 18 | 21 | 19 | 10 | 27 | 8  | 12 | 24 | 16 | 26 | 23 | 28 | 25 | 29 |
| Oman                                          | 8  | 7 | 3 | 2 | 4  | 9  | 1 | 6  | 18 | 20 | 12 | 14 | 13 | 5  | 23 | 19 | 15 | 10 | 16 | 26 | 11 | 25 | 27 | 24 | 29 | 21 | 22 | 17 | 28 |
| Palestine                                     | 13 | 3 | 2 | 1 | 7  | 9  | 6 | 5  | 18 | 24 | 12 | 11 | 10 | 14 | 8  | 22 | 17 | 4  | 16 | 27 | 15 | 23 | 21 | 25 | 28 | 20 | 26 | 19 | 29 |
| Qatar                                         | 10 | 6 | 4 | 1 | 3  | 14 | 2 | 5  | 18 | 21 | 7  | 15 | 12 | 8  | 22 | 23 | 11 | 9  | 16 | 27 | 13 | 19 | 26 | 25 | 28 | 24 | 17 | 20 | 29 |
| Saudi Arabia                                  | 14 | 7 | 3 | 1 | 4  | 15 | 2 | 8  | 19 | 23 | 12 | 11 | 13 | 6  | 18 | 20 | 10 | 9  | 16 | 27 | 5  | 26 | 24 | 17 | 28 | 25 | 21 | 22 | 29 |
| Sudan                                         | 9  | 6 | 5 | 1 | 8  | 3  | 4 | 2  | 13 | 11 | 12 | 14 | 10 | 15 | 24 | 22 | 16 | 7  | 19 | 26 | 17 | 18 | 21 | 27 | 28 | 23 | 25 | 20 | 29 |
| Syrian Arab Republic                          | 8  | 3 | 5 | 2 | 4  | 9  | 6 | 1  | 16 | 21 | 11 | 12 | 10 | 13 | 14 | 20 | 17 | 7  | 15 | 25 | 19 | 18 | 23 | 26 | 27 | 22 | 24 | 28 | 29 |
| Tunisia                                       | 7  | 2 | 3 | 1 | 5  | 8  | 6 | 10 | 14 | 25 | 21 | 13 | 4  | 19 | 18 | 17 | 16 | 22 | 15 | 26 | 12 | 11 | 20 | 9  | 27 | 23 | 28 | 24 | 29 |
| Turkey                                        | 5  | 1 | 2 | 3 | 4  | 6  | 7 | 10 | 20 | 23 | 18 | 9  | 8  | 12 | 14 | 25 | 13 | 11 | 17 | 22 | 16 | 19 | 24 | 26 | 29 | 21 | 15 | 27 | 28 |
| United Arab Emirates                          | 14 | 8 | 3 | 1 | 5  | 15 | 2 | 12 | 18 | 13 | 17 | 4  | 7  | 9  | 24 | 20 | 6  | 10 | 19 | 26 | 11 | 16 | 25 | 27 | 28 | 22 | 21 | 23 | 29 |
| Yemen                                         | 9  | 5 | 6 | 2 | 8  | 1  | 4 | 3  | 10 | 11 | 13 | 17 | 12 | 16 | 23 | 21 | 18 | 7  | 19 | 25 | 15 | 14 | 20 | 26 | 28 | 24 | 27 | 22 | 29 |
| <b>South Asia</b>                             | 21 | 4 | 5 | 1 | 10 | 7  | 3 | 9  | 6  | 11 | 16 | 15 | 19 | 14 | 22 | 2  | 23 | 17 | 13 | 28 | 20 | 12 | 18 | 24 | 8  | 25 | 27 | 26 | 29 |
| <b>South Asia</b>                             | 21 | 4 | 5 | 1 | 10 | 7  | 3 | 9  | 6  | 11 | 16 | 15 | 19 | 14 | 22 | 2  | 23 | 17 | 13 | 28 | 20 | 12 | 18 | 24 | 8  | 25 | 27 | 26 | 29 |
| Bangladesh                                    | 27 | 3 | 7 | 2 | 8  | 5  | 1 | 11 | 6  | 9  | 13 | 17 | 20 | 16 | 22 | 4  | 23 | 15 | 14 | 28 | 19 | 12 | 18 | 21 | 10 | 24 | 26 | 25 | 29 |
| Bhutan                                        | 27 | 5 | 3 | 1 | 8  | 2  | 6 | 9  | 7  | 10 | 13 | 15 | 20 | 14 | 21 | 4  | 22 | 16 | 12 | 28 | 18 | 19 | 17 | 24 | 11 | 23 | 26 | 25 | 29 |
| India                                         | 20 | 4 | 3 | 1 | 10 | 6  | 7 | 9  | 5  | 11 | 16 | 13 | 21 | 14 | 22 | 2  | 23 | 18 | 15 | 29 | 19 | 12 | 17 | 24 | 8  | 25 | 27 | 26 | 28 |
| Nepal                                         | 26 | 5 | 7 | 2 | 10 | 4  | 1 | 9  | 3  | 8  | 19 | 14 | 20 | 16 | 21 | 6  | 22 | 17 | 12 | 28 | 18 | 13 | 15 | 23 | 11 | 24 | 27 | 25 | 29 |
| Pakistan                                      | 27 | 4 | 7 | 1 | 12 | 11 | 3 | 5  | 13 | 8  | 18 | 22 | 9  | 21 | 15 | 2  | 24 | 14 | 6  | 28 | 17 | 10 | 19 | 25 | 16 | 26 | 23 | 20 | 29 |
| <b>Southeast Asia, East Asia, and Oceania</b> | 5  | 1 | 2 | 4 | 9  | 3  | 7 | 10 | 11 | 6  | 8  | 12 | 14 | 15 | 17 | 18 | 19 | 16 | 20 | 27 | 21 | 22 | 23 | 13 | 26 | 24 | 25 | 28 | 29 |
| <b>East Asia</b>                              | 5  | 1 | 2 | 4 | 9  | 3  | 8 | 10 | 12 | 6  | 7  | 11 | 14 | 16 | 17 | 19 | 18 | 15 | 20 | 26 | 22 | 21 | 23 | 13 | 27 | 24 | 25 | 28 | 29 |
| China                                         | 5  | 1 | 3 | 4 | 10 | 2  | 8 | 9  | 13 | 6  | 7  | 11 | 14 | 16 | 17 | 21 | 18 | 15 | 19 | 26 | 22 | 20 | 23 | 12 | 27 | 24 | 25 | 28 | 29 |
| Democratic People's Republic of Korea         | 23 | 1 | 3 | 4 | 10 | 2  | 9 | 8  | 6  | 7  | 5  | 12 | 14 | 16 | 11 | 18 | 19 | 13 | 15 | 26 | 17 | 22 | 20 | 21 | 27 | 24 | 28 | 25 | 29 |
| Taiwan (Province of China)                    | 26 | 2 | 1 | 3 | 4  | 5  | 8 | 15 | 16 | 9  | 12 | 11 | 7  | 13 | 14 | 6  | 10 | 22 | 20 | 28 | 19 | 23 | 21 | 17 | 18 | 24 | 25 | 27 | 29 |
| <b>Oceania</b>                                | 25 | 2 | 6 | 1 | 7  | 4  | 8 | 5  | 3  | 17 | 11 | 15 | 14 | 18 | 9  | 10 | 20 | 12 | 13 | 27 | 16 | 23 | 22 | 19 | 28 | 21 | 24 | 26 | 29 |
| American Samoa                                | 22 | 2 | 4 | 1 | 3  | 6  | 9 | 12 | 7  | 21 | 10 | 11 | 13 | 15 | 5  | 19 | 18 | 16 | 8  | 25 | 14 | 24 | 23 | 17 | 26 | 20 | 29 | 28 | 27 |
| Cook Islands                                  | 23 | 3 | 4 | 2 | 1  | 6  | 8 | 14 | 10 | 15 | 5  | 9  | 7  | 12 | 11 | 13 | 18 | 19 | 16 | 25 | 17 | 22 | 20 | 28 | 27 | 21 | 24 | 26 | 29 |
| Fiji                                          | 25 | 4 | 3 | 1 | 5  | 8  | 7 | 6  | 2  | 16 | 10 | 12 | 14 | 15 | 9  | 13 | 20 | 17 | 18 | 28 | 11 | 23 | 21 | 27 | 26 | 22 | 19 | 24 | 29 |



|                                   |    |   |   |   |    |    |    |    |    |    |    |    |    |    |    |    |    |    |    |    |    |    |    |    |    |    |    |    |    |
|-----------------------------------|----|---|---|---|----|----|----|----|----|----|----|----|----|----|----|----|----|----|----|----|----|----|----|----|----|----|----|----|----|
| Guam                              | 22 | 1 | 2 | 3 | 4  | 6  | 12 | 11 | 5  | 19 | 7  | 9  | 13 | 10 | 8  | 14 | 17 | 20 | 15 | 27 | 16 | 23 | 24 | 18 | 25 | 21 | 28 | 26 | 29 |
| Kiribati                          | 27 | 4 | 8 | 2 | 14 | 5  | 7  | 9  | 1  | 10 | 6  | 16 | 18 | 15 | 12 | 3  | 13 | 19 | 17 | 28 | 24 | 25 | 21 | 20 | 23 | 22 | 11 | 26 | 29 |
| Marshall Islands                  | 24 | 2 | 5 | 1 | 7  | 4  | 9  | 8  | 3  | 18 | 6  | 13 | 14 | 15 | 10 | 12 | 20 | 16 | 11 | 26 | 17 | 23 | 22 | 19 | 28 | 21 | 29 | 25 | 27 |
| Micronesia (Federated States of)  | 24 | 2 | 5 | 1 | 6  | 4  | 10 | 9  | 3  | 17 | 7  | 12 | 14 | 16 | 8  | 13 | 19 | 18 | 11 | 25 | 15 | 23 | 22 | 20 | 28 | 21 | 29 | 26 | 27 |
| Nauru                             | 27 | 2 | 4 | 1 | 9  | 5  | 8  | 6  | 3  | 19 | 10 | 16 | 17 | 11 | 7  | 13 | 18 | 15 | 14 | 26 | 12 | 22 | 23 | 20 | 28 | 21 | 24 | 25 | 29 |
| Niue                              | 24 | 2 | 4 | 1 | 3  | 6  | 9  | 11 | 5  | 18 | 8  | 10 | 12 | 15 | 7  | 14 | 17 | 19 | 13 | 25 | 16 | 22 | 23 | 21 | 27 | 20 | 26 | 28 | 29 |
| Northern Mariana Islands          | 24 | 1 | 3 | 2 | 4  | 8  | 10 | 13 | 6  | 20 | 9  | 11 | 12 | 14 | 5  | 7  | 16 | 19 | 17 | 26 | 15 | 23 | 25 | 18 | 22 | 21 | 29 | 27 | 28 |
| Palau                             | 20 | 1 | 6 | 2 | 5  | 8  | 7  | 12 | 3  | 15 | 9  | 10 | 16 | 13 | 19 | 4  | 18 | 17 | 14 | 21 | 11 | 22 | 24 | 25 | 26 | 23 | 29 | 27 | 28 |
| Papua New Guinea                  | 24 | 2 | 8 | 1 | 7  | 4  | 6  | 5  | 3  | 14 | 18 | 16 | 13 | 20 | 9  | 11 | 19 | 10 | 12 | 26 | 15 | 23 | 22 | 17 | 27 | 21 | 29 | 25 | 28 |
| Samoa                             | 26 | 5 | 3 | 1 | 7  | 4  | 6  | 9  | 2  | 23 | 11 | 12 | 14 | 15 | 10 | 16 | 21 | 18 | 8  | 22 | 13 | 27 | 24 | 19 | 28 | 25 | 20 | 17 | 29 |
| Solomon Islands                   | 25 | 3 | 6 | 1 | 10 | 4  | 7  | 5  | 2  | 17 | 11 | 18 | 16 | 8  | 9  | 12 | 20 | 14 | 15 | 26 | 13 | 23 | 22 | 19 | 27 | 21 | 29 | 24 | 28 |
| Tokelau                           | 23 | 2 | 5 | 1 | 4  | 6  | 9  | 10 | 3  | 18 | 8  | 11 | 13 | 16 | 7  | 14 | 19 | 17 | 12 | 25 | 15 | 24 | 22 | 21 | 26 | 20 | 28 | 27 | 29 |
| Tonga                             | 20 | 2 | 8 | 1 | 5  | 7  | 9  | 12 | 6  | 17 | 3  | 13 | 16 | 10 | 11 | 15 | 21 | 18 | 14 | 26 | 19 | 25 | 24 | 23 | 28 | 22 | 4  | 27 | 29 |
| Tuvalu                            | 24 | 2 | 6 | 1 | 4  | 5  | 9  | 10 | 3  | 18 | 7  | 11 | 14 | 15 | 8  | 13 | 19 | 17 | 12 | 25 | 16 | 23 | 22 | 20 | 27 | 21 | 29 | 26 | 28 |
| Vanuatu                           | 24 | 1 | 6 | 2 | 5  | 4  | 9  | 8  | 3  | 16 | 7  | 13 | 15 | 14 | 10 | 11 | 20 | 12 | 17 | 25 | 18 | 23 | 22 | 19 | 28 | 21 | 29 | 26 | 27 |
| <b>Southeast Asia</b>             | 20 | 2 | 3 | 1 | 6  | 9  | 5  | 8  | 4  | 19 | 7  | 13 | 18 | 14 | 15 | 10 | 17 | 16 | 11 | 28 | 12 | 23 | 22 | 21 | 24 | 25 | 26 | 27 | 29 |
| Cambodia                          | 22 | 1 | 2 | 3 | 9  | 7  | 8  | 5  | 4  | 17 | 6  | 15 | 18 | 16 | 12 | 11 | 19 | 14 | 10 | 28 | 13 | 21 | 23 | 20 | 25 | 24 | 27 | 26 | 29 |
| Indonesia                         | 20 | 2 | 3 | 1 | 6  | 8  | 5  | 7  | 4  | 18 | 19 | 10 | 17 | 14 | 11 | 12 | 15 | 16 | 9  | 28 | 13 | 22 | 23 | 21 | 25 | 24 | 26 | 27 | 29 |
| Lao People's Democratic Republic  | 21 | 1 | 3 | 2 | 9  | 6  | 8  | 4  | 5  | 17 | 7  | 14 | 18 | 16 | 11 | 13 | 19 | 12 | 10 | 28 | 15 | 22 | 23 | 20 | 25 | 24 | 27 | 26 | 29 |
| Malaysia                          | 19 | 3 | 2 | 1 | 5  | 10 | 8  | 6  | 4  | 20 | 11 | 18 | 13 | 7  | 15 | 12 | 17 | 21 | 16 | 28 | 14 | 22 | 24 | 9  | 25 | 26 | 23 | 27 | 29 |
| Maldives                          | 21 | 3 | 2 | 1 | 5  | 15 | 4  | 6  | 10 | 20 | 8  | 13 | 16 | 11 | 18 | 9  | 17 | 14 | 7  | 26 | 12 | 22 | 25 | 29 | 24 | 23 | 28 | 19 | 27 |
| Mauritius                         | 21 | 3 | 2 | 1 | 4  | 5  | 8  | 12 | 7  | 16 | 17 | 9  | 13 | 15 | 6  | 10 | 14 | 20 | 11 | 28 | 18 | 19 | 23 | 24 | 25 | 22 | 27 | 26 | 29 |
| Myanmar                           | 20 | 1 | 3 | 2 | 9  | 7  | 8  | 5  | 6  | 18 | 11 | 13 | 17 | 4  | 12 | 14 | 19 | 16 | 10 | 28 | 15 | 22 | 23 | 21 | 25 | 24 | 27 | 26 | 29 |
| Philippines                       | 18 | 3 | 2 | 1 | 6  | 11 | 7  | 4  | 5  | 21 | 8  | 13 | 20 | 15 | 12 | 14 | 17 | 16 | 9  | 28 | 10 | 22 | 25 | 19 | 26 | 24 | 23 | 27 | 29 |
| Seychelles                        | 23 | 5 | 2 | 3 | 1  | 13 | 12 | 7  | 4  | 15 | 16 | 14 | 10 | 8  | 17 | 6  | 20 | 18 | 9  | 28 | 24 | 11 | 25 | 22 | 19 | 21 | 26 | 27 | 29 |
| Sri Lanka                         | 22 | 3 | 2 | 1 | 7  | 8  | 4  | 9  | 11 | 10 | 17 | 16 | 18 | 12 | 13 | 5  | 6  | 19 | 15 | 29 | 14 | 23 | 20 | 26 | 21 | 24 | 27 | 25 | 28 |
| Thailand                          | 13 | 2 | 4 | 3 | 6  | 9  | 7  | 8  | 5  | 16 | 1  | 12 | 15 | 18 | 19 | 10 | 21 | 17 | 14 | 28 | 20 | 22 | 11 | 23 | 25 | 24 | 26 | 27 | 29 |
| Timor-Leste                       | 20 | 1 | 2 | 3 | 6  | 7  | 8  | 4  | 5  | 17 | 9  | 14 | 18 | 15 | 12 | 13 | 19 | 10 | 11 | 28 | 16 | 22 | 23 | 21 | 25 | 24 | 27 | 26 | 29 |
| Viet Nam                          | 23 | 2 | 3 | 1 | 9  | 5  | 4  | 10 | 6  | 18 | 20 | 12 | 16 | 17 | 19 | 8  | 22 | 21 | 11 | 28 | 7  | 15 | 24 | 13 | 14 | 26 | 25 | 27 | 29 |
| <b>Sub-Saharan Africa</b>         | 9  | 4 | 7 | 2 | 3  | 8  | 5  | 6  | 1  | 10 | 11 | 12 | 16 | 13 | 19 | 17 | 18 | 15 | 14 | 26 | 20 | 21 | 25 | 24 | 27 | 23 | 28 | 22 | 29 |
| <b>Central sub-Saharan Africa</b> | 10 | 3 | 9 | 2 | 5  | 7  | 4  | 8  | 1  | 6  | 16 | 15 | 11 | 12 | 18 | 13 | 19 | 14 | 17 | 24 | 22 | 20 | 23 | 26 | 28 | 21 | 27 | 25 | 29 |
| Angola                            | 10 | 3 | 5 | 2 | 6  | 8  | 7  | 4  | 1  | 9  | 16 | 15 | 13 | 11 | 19 | 12 | 18 | 14 | 17 | 24 | 22 | 20 | 23 | 27 | 28 | 21 | 25 | 26 | 29 |
| Central African Republic          | 10 | 3 | 9 | 2 | 8  | 4  | 7  | 5  | 1  | 6  | 11 | 16 | 15 | 13 | 19 | 12 | 21 | 14 | 18 | 26 | 24 | 17 | 22 | 25 | 27 | 20 | 28 | 23 | 29 |
| Congo                             | 10 | 3 | 4 | 2 | 5  | 7  | 8  | 9  | 1  | 6  | 16 | 11 | 12 | 13 | 17 | 14 | 19 | 18 | 15 | 24 | 22 | 20 | 23 | 26 | 25 | 21 | 28 | 27 | 29 |

|                                    |    |    |   |   |    |    |    |    |   |    |    |    |    |    |    |    |    |    |    |    |    |    |    |    |    |    |    |    |    |
|------------------------------------|----|----|---|---|----|----|----|----|---|----|----|----|----|----|----|----|----|----|----|----|----|----|----|----|----|----|----|----|----|
| Democratic Republic of the Congo   | 10 | 3  | 9 | 2 | 6  | 7  | 4  | 8  | 1 | 5  | 15 | 16 | 11 | 12 | 18 | 13 | 20 | 14 | 17 | 25 | 22 | 19 | 23 | 26 | 28 | 21 | 27 | 24 | 29 |
| Equatorial Guinea                  | 10 | 3  | 4 | 1 | 5  | 11 | 6  | 8  | 2 | 7  | 16 | 12 | 13 | 9  | 19 | 15 | 17 | 18 | 14 | 25 | 20 | 22 | 24 | 28 | 26 | 21 | 23 | 27 | 29 |
| Gabon                              | 10 | 2  | 4 | 1 | 5  | 7  | 8  | 12 | 3 | 6  | 16 | 9  | 11 | 13 | 18 | 14 | 17 | 19 | 15 | 24 | 22 | 20 | 23 | 27 | 25 | 21 | 26 | 28 | 29 |
| <b>Eastern sub-Saharan Africa</b>  | 10 | 9  | 7 | 2 | 6  | 8  | 4  | 3  | 1 | 5  | 13 | 18 | 17 | 14 | 20 | 12 | 19 | 16 | 11 | 25 | 15 | 23 | 26 | 21 | 27 | 24 | 28 | 22 | 29 |
| Burundi                            | 10 | 9  | 8 | 2 | 6  | 7  | 3  | 5  | 1 | 4  | 13 | 18 | 16 | 14 | 20 | 11 | 23 | 12 | 15 | 25 | 17 | 22 | 26 | 19 | 27 | 24 | 28 | 21 | 29 |
| Comoros                            | 11 | 7  | 6 | 2 | 3  | 8  | 5  | 9  | 1 | 4  | 15 | 12 | 16 | 14 | 17 | 13 | 20 | 19 | 10 | 25 | 18 | 23 | 24 | 21 | 27 | 22 | 28 | 26 | 29 |
| Djibouti                           | 10 | 7  | 5 | 2 | 3  | 9  | 4  | 8  | 1 | 6  | 15 | 13 | 16 | 14 | 20 | 12 | 18 | 17 | 11 | 25 | 19 | 22 | 27 | 21 | 26 | 23 | 28 | 24 | 29 |
| Eritrea                            | 10 | 8  | 6 | 2 | 9  | 5  | 4  | 7  | 1 | 3  | 14 | 18 | 17 | 13 | 16 | 11 | 21 | 15 | 12 | 24 | 19 | 23 | 26 | 20 | 27 | 25 | 28 | 22 | 29 |
| Ethiopia                           | 10 | 9  | 5 | 3 | 7  | 6  | 4  | 1  | 2 | 15 | 14 | 20 | 16 | 23 | 19 | 13 | 17 | 11 | 12 | 26 | 8  | 24 | 22 | 21 | 28 | 25 | 27 | 18 | 29 |
| Kenya                              | 11 | 10 | 7 | 1 | 4  | 5  | 6  | 9  | 2 | 3  | 14 | 15 | 18 | 12 | 21 | 8  | 23 | 16 | 13 | 27 | 24 | 19 | 22 | 17 | 25 | 20 | 29 | 26 | 28 |
| Madagascar                         | 10 | 9  | 7 | 2 | 5  | 8  | 4  | 6  | 1 | 3  | 14 | 16 | 18 | 13 | 19 | 12 | 21 | 15 | 11 | 23 | 17 | 24 | 26 | 20 | 27 | 25 | 28 | 22 | 29 |
| Malawi                             | 12 | 9  | 8 | 4 | 7  | 15 | 2  | 6  | 1 | 3  | 14 | 17 | 5  | 10 | 22 | 18 | 11 | 16 | 13 | 19 | 20 | 26 | 25 | 27 | 29 | 23 | 24 | 21 | 28 |
| Mozambique                         | 9  | 6  | 5 | 3 | 11 | 8  | 4  | 2  | 1 | 7  | 13 | 15 | 16 | 10 | 19 | 18 | 22 | 14 | 12 | 23 | 17 | 21 | 25 | 29 | 27 | 24 | 26 | 20 | 28 |
| Rwanda                             | 12 | 8  | 6 | 2 | 4  | 9  | 3  | 7  | 1 | 5  | 11 | 15 | 17 | 14 | 19 | 13 | 20 | 16 | 10 | 25 | 18 | 22 | 26 | 21 | 27 | 23 | 28 | 24 | 29 |
| Somalia                            | 10 | 8  | 9 | 5 | 7  | 6  | 4  | 2  | 1 | 3  | 11 | 21 | 17 | 15 | 19 | 13 | 23 | 12 | 14 | 25 | 18 | 22 | 26 | 20 | 27 | 24 | 28 | 16 | 29 |
| South Sudan                        | 10 | 8  | 6 | 5 | 3  | 9  | 7  | 2  | 1 | 4  | 13 | 15 | 17 | 11 | 19 | 12 | 18 | 16 | 14 | 27 | 20 | 23 | 26 | 21 | 25 | 24 | 28 | 22 | 29 |
| Uganda                             | 10 | 9  | 6 | 2 | 3  | 8  | 5  | 7  | 1 | 4  | 11 | 13 | 19 | 16 | 15 | 14 | 21 | 17 | 12 | 25 | 18 | 26 | 27 | 20 | 24 | 23 | 28 | 22 | 29 |
| United Republic of Tanzania        | 11 | 8  | 7 | 2 | 4  | 9  | 5  | 3  | 1 | 6  | 20 | 15 | 16 | 10 | 19 | 13 | 18 | 14 | 12 | 25 | 17 | 23 | 26 | 21 | 27 | 22 | 28 | 24 | 29 |
| Zambia                             | 13 | 8  | 5 | 2 | 6  | 9  | 3  | 7  | 1 | 4  | 19 | 14 | 16 | 10 | 20 | 12 | 18 | 17 | 11 | 24 | 15 | 22 | 27 | 21 | 26 | 25 | 28 | 23 | 29 |
| <b>Southern sub-Saharan Africa</b> | 1  | 4  | 6 | 3 | 5  | 9  | 11 | 12 | 2 | 7  | 8  | 10 | 16 | 13 | 17 | 15 | 20 | 19 | 14 | 22 | 23 | 21 | 24 | 28 | 26 | 18 | 27 | 29 | 25 |
| Botswana                           | 5  | 4  | 6 | 2 | 3  | 8  | 12 | 9  | 1 | 7  | 21 | 10 | 15 | 16 | 14 | 11 | 19 | 17 | 13 | 22 | 27 | 18 | 24 | 26 | 23 | 20 | 28 | 29 | 25 |
| Eswatini                           | 4  | 5  | 8 | 2 | 6  | 9  | 10 | 12 | 1 | 7  | 3  | 11 | 16 | 13 | 17 | 15 | 18 | 19 | 14 | 22 | 23 | 20 | 25 | 27 | 26 | 21 | 29 | 28 | 24 |
| Lesotho                            | 4  | 3  | 8 | 2 | 5  | 9  | 11 | 10 | 1 | 7  | 6  | 13 | 18 | 15 | 16 | 12 | 21 | 19 | 14 | 23 | 24 | 17 | 25 | 26 | 27 | 20 | 29 | 28 | 22 |
| Namibia                            | 2  | 8  | 6 | 1 | 3  | 14 | 5  | 11 | 4 | 17 | 13 | 12 | 19 | 9  | 20 | 7  | 18 | 21 | 16 | 10 | 23 | 15 | 28 | 29 | 22 | 24 | 26 | 27 | 25 |
| South Africa                       | 1  | 3  | 6 | 2 | 5  | 10 | 11 | 12 | 4 | 7  | 8  | 9  | 16 | 13 | 17 | 15 | 19 | 18 | 14 | 22 | 23 | 21 | 25 | 28 | 26 | 20 | 27 | 29 | 24 |
| Zimbabwe                           | 7  | 6  | 8 | 2 | 3  | 9  | 11 | 14 | 1 | 4  | 5  | 12 | 10 | 22 | 15 | 17 | 23 | 21 | 13 | 20 | 18 | 19 | 24 | 25 | 27 | 16 | 28 | 26 | 29 |
| <b>Western sub-Saharan Africa</b>  | 12 | 4  | 5 | 1 | 3  | 6  | 8  | 7  | 2 | 15 | 9  | 10 | 14 | 11 | 19 | 18 | 17 | 13 | 16 | 26 | 25 | 21 | 23 | 24 | 28 | 22 | 27 | 20 | 29 |
| Benin                              | 13 | 6  | 8 | 2 | 4  | 3  | 7  | 5  | 1 | 10 | 9  | 11 | 16 | 12 | 19 | 18 | 15 | 14 | 17 | 26 | 23 | 20 | 21 | 27 | 28 | 22 | 24 | 25 | 29 |
| Burkina Faso                       | 11 | 6  | 8 | 2 | 5  | 3  | 7  | 4  | 1 | 9  | 14 | 13 | 15 | 10 | 19 | 17 | 16 | 12 | 18 | 26 | 23 | 20 | 21 | 27 | 28 | 22 | 25 | 24 | 29 |
| Cabo Verde                         | 18 | 3  | 7 | 4 | 1  | 2  | 10 | 11 | 6 | 5  | 8  | 9  | 13 | 14 | 16 | 12 | 15 | 17 | 19 | 25 | 21 | 20 | 22 | 26 | 24 | 23 | 27 | 28 | 29 |
| Cameroon                           | 12 | 4  | 6 | 2 | 3  | 5  | 10 | 7  | 1 | 11 | 23 | 8  | 13 | 9  | 17 | 16 | 19 | 15 | 14 | 27 | 24 | 18 | 21 | 20 | 26 | 22 | 28 | 25 | 29 |
| Chad                               | 12 | 5  | 8 | 6 | 3  | 2  | 7  | 4  | 1 | 10 | 9  | 15 | 14 | 11 | 18 | 16 | 17 | 13 | 19 | 27 | 24 | 20 | 21 | 26 | 28 | 22 | 25 | 23 | 29 |
| Côte d'Ivoire                      | 16 | 4  | 6 | 2 | 5  | 3  | 8  | 7  | 1 | 10 | 9  | 11 | 13 | 12 | 19 | 17 | 18 | 14 | 15 | 27 | 23 | 20 | 21 | 25 | 28 | 22 | 26 | 24 | 29 |
| Gambia                             | 10 | 4  | 6 | 3 | 9  | 8  | 5  | 7  | 2 | 15 | 1  | 11 | 14 | 19 | 17 | 13 | 18 | 16 | 12 | 26 | 21 | 23 | 20 | 28 | 27 | 22 | 25 | 24 | 29 |

|                       |    |   |   |   |    |   |    |    |   |    |    |    |    |    |    |    |    |    |    |    |    |    |    |    |    |    |    |    |    |
|-----------------------|----|---|---|---|----|---|----|----|---|----|----|----|----|----|----|----|----|----|----|----|----|----|----|----|----|----|----|----|----|
| Ghana                 | 14 | 6 | 4 | 1 | 3  | 8 | 11 | 10 | 2 | 16 | 9  | 5  | 13 | 7  | 17 | 20 | 18 | 12 | 15 | 25 | 24 | 19 | 21 | 28 | 27 | 22 | 23 | 26 | 29 |
| Guinea                | 12 | 6 | 8 | 5 | 3  | 4 | 7  | 11 | 1 | 14 | 2  | 17 | 9  | 22 | 15 | 10 | 16 | 18 | 13 | 20 | 24 | 21 | 23 | 28 | 27 | 26 | 25 | 19 | 29 |
| Guinea-Bissau         | 13 | 4 | 7 | 2 | 5  | 3 | 8  | 6  | 1 | 10 | 9  | 12 | 14 | 11 | 18 | 17 | 19 | 15 | 16 | 26 | 23 | 20 | 21 | 25 | 27 | 22 | 28 | 24 | 29 |
| Liberia               | 12 | 5 | 7 | 2 | 3  | 4 | 8  | 6  | 1 | 10 | 9  | 11 | 14 | 13 | 18 | 17 | 19 | 16 | 15 | 25 | 23 | 20 | 22 | 26 | 27 | 21 | 28 | 24 | 29 |
| Mali                  | 9  | 7 | 6 | 4 | 11 | 2 | 10 | 8  | 1 | 13 | 3  | 12 | 5  | 20 | 18 | 16 | 14 | 15 | 17 | 24 | 21 | 19 | 22 | 28 | 27 | 25 | 23 | 26 | 29 |
| Mauritania            | 12 | 4 | 6 | 2 | 3  | 5 | 8  | 9  | 1 | 11 | 10 | 7  | 14 | 13 | 16 | 17 | 19 | 18 | 15 | 24 | 23 | 20 | 21 | 27 | 26 | 22 | 28 | 25 | 29 |
| Niger                 | 9  | 7 | 8 | 6 | 4  | 3 | 5  | 2  | 1 | 10 | 22 | 13 | 12 | 18 | 15 | 14 | 16 | 11 | 17 | 25 | 28 | 19 | 20 | 27 | 26 | 21 | 24 | 23 | 29 |
| Nigeria               | 13 | 6 | 4 | 1 | 2  | 9 | 5  | 7  | 3 | 22 | 11 | 8  | 18 | 12 | 23 | 20 | 16 | 10 | 14 | 25 | 26 | 17 | 24 | 19 | 28 | 21 | 27 | 15 | 29 |
| São Tomé and Príncipe | 14 | 4 | 5 | 3 | 7  | 6 | 2  | 10 | 1 | 11 | 15 | 16 | 8  | 13 | 12 | 19 | 18 | 23 | 9  | 25 | 22 | 20 | 17 | 27 | 26 | 21 | 24 | 29 | 28 |
| Senegal               | 8  | 5 | 6 | 2 | 3  | 4 | 7  | 9  | 1 | 10 | 16 | 11 | 13 | 12 | 18 | 17 | 19 | 15 | 14 | 25 | 23 | 20 | 21 | 26 | 27 | 22 | 28 | 24 | 29 |
| Sierra Leone          | 11 | 5 | 8 | 2 | 3  | 4 | 7  | 6  | 1 | 10 | 9  | 13 | 15 | 12 | 19 | 18 | 17 | 14 | 16 | 26 | 23 | 20 | 21 | 27 | 28 | 22 | 25 | 24 | 29 |
| Togo                  | 12 | 4 | 6 | 2 | 5  | 3 | 8  | 7  | 1 | 10 | 9  | 11 | 14 | 13 | 18 | 17 | 19 | 16 | 15 | 25 | 23 | 20 | 21 | 26 | 27 | 22 | 28 | 24 | 29 |

*eFigure 12: Ranking of 29 cancer groups by incidence in 2019, by country and location group*

Footnote: Cancer rankings by location compare the absolute number of incident cases for each cancer, with colors ranging from the highest ranking (red) to the lowest ranking (green) within that location. Socio-demographic index (SDI) quintiles are ordered from high to low SDI quintile. Countries and location groups are ordered alphabetically by the GBD location hierarchy of 7 super-regions (bold, italicized) and 21 regions (bold).

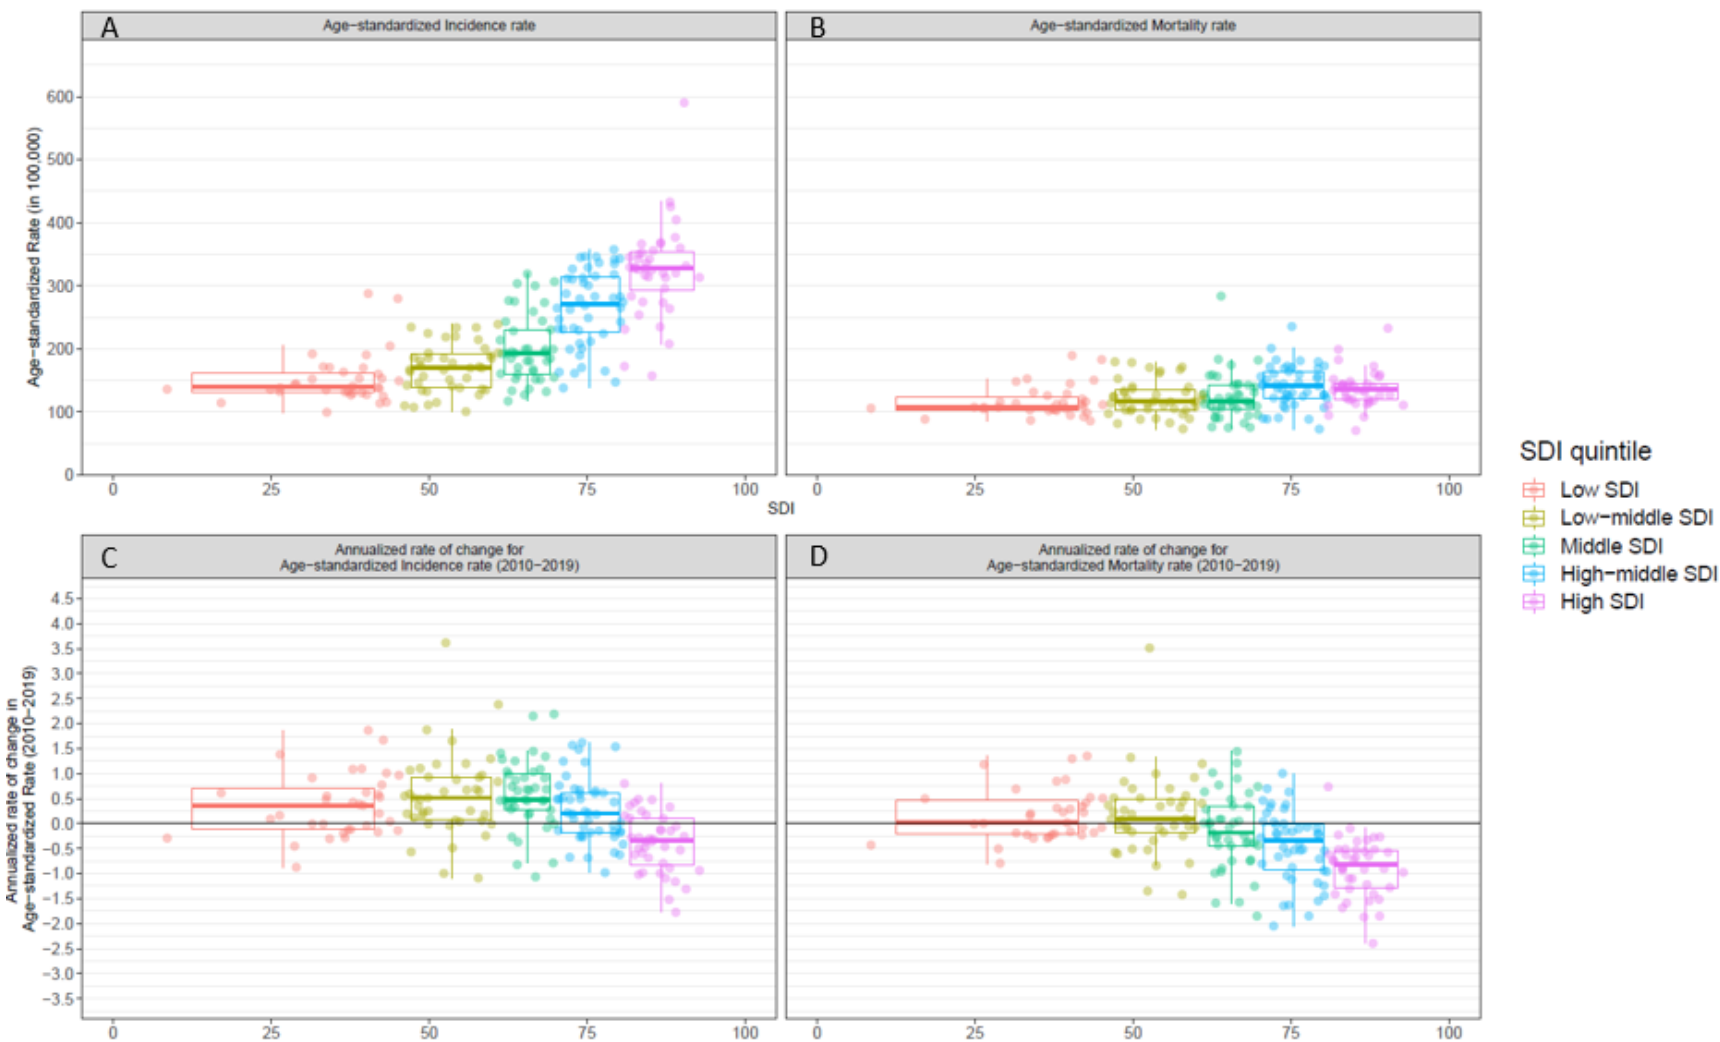

Figure 13: Age-standardized rates and Annualized rate of change for age-standardized rates for Total Cancers excluding Non-Melanoma Skin Cancer, All Ages, Both Sexes

Footnote: Panels provide global estimates for total cancers except non-melanoma skin cancer, stratified by quintile of Socio-demographic Index. Annualized rate of change from 2010 to 2019 represents the average percentage change per year over this period. Dots represent individual countries and territories. Box plots show the 25<sup>th</sup>, 50<sup>th</sup>, and 75<sup>th</sup> percentile of each SDI quintile, with vertical bars representing bounds for outliers (bars extend to the furthest observation that is within a distance of 1.5 times the interquartile range from the 25<sup>th</sup> or 75<sup>th</sup> percentiles). The x-axis provides SDI values, quintile cutoffs are described in the eAppendix. Panels provide: A) age-standardized incidence and mortality rates per 100,000 persons in 2019; B) age-standardized incidence rates per 100,000 persons in 2019; C) annualized rate of change in the age-standardized incidence rates from 2010 to 2019; and D) annualized rate of change in the number of age-standardized mortality rates from 2010 to 2019.

A) Both sexes combined

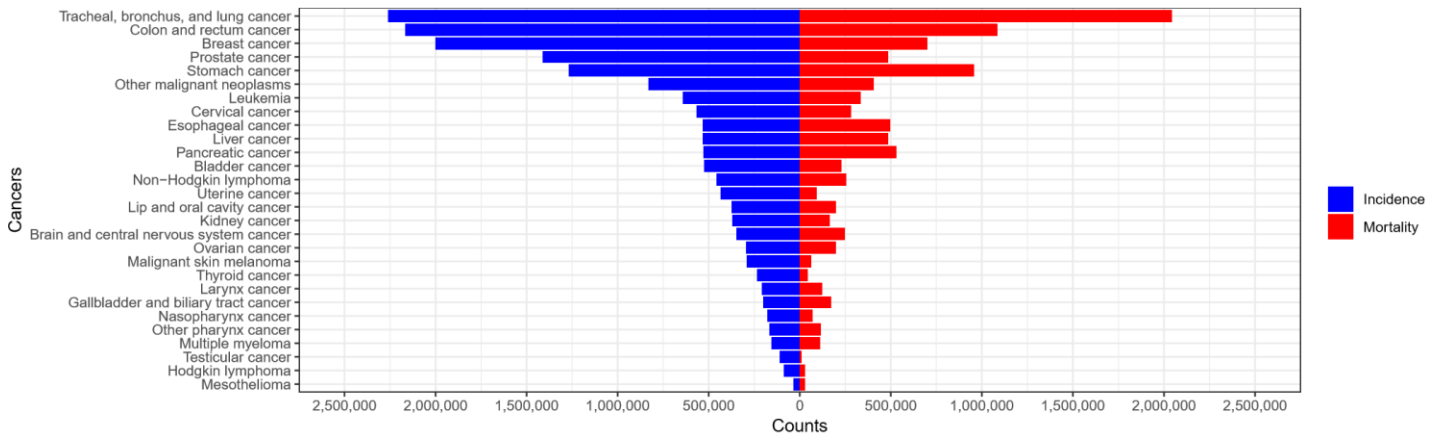

B) Male only

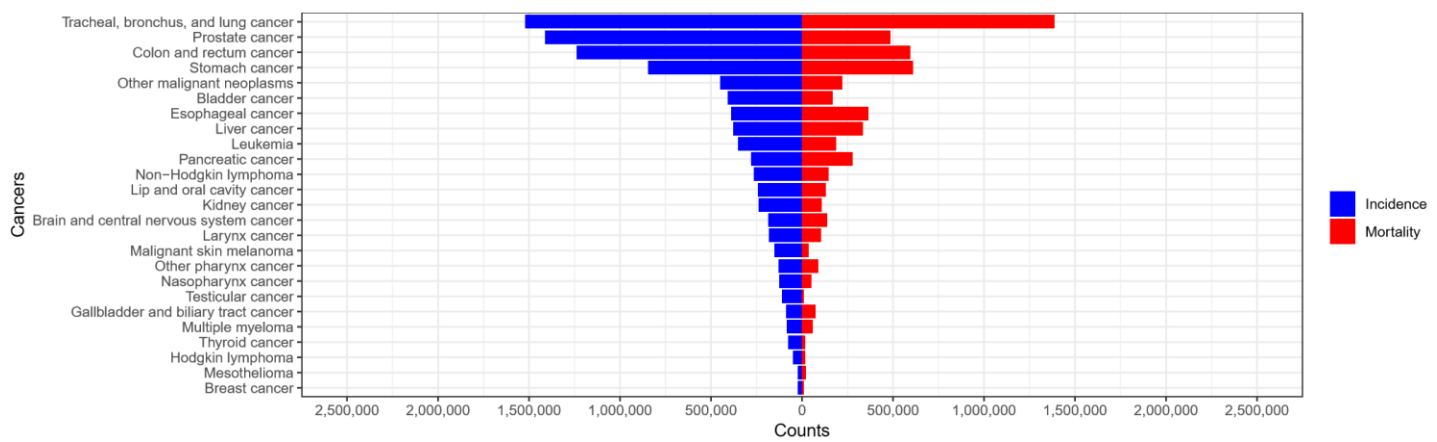

C) Female only

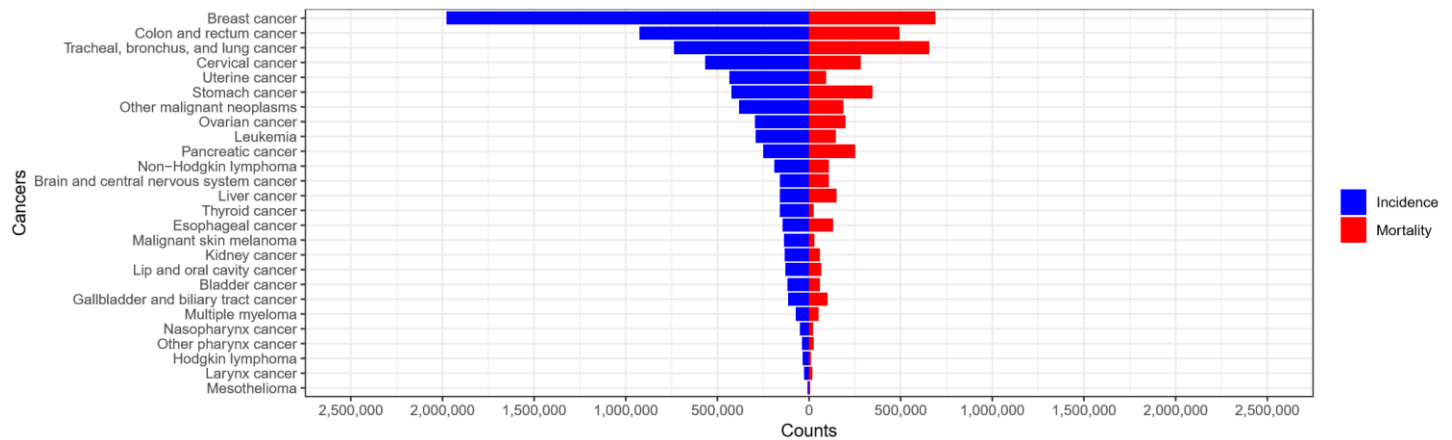

Figure 14: Global counts of cancer-specific incidence and deaths in 2019, overall and by sex

Footnote: Panels provide the global absolute counts of cancer incidence and mortality in 2019, in order of decreasing incidence, for A) both sexes combined, B) males only, and C) females only. Values and associated 95% uncertainty intervals are reported in Table 1.

A) Both sexes combined

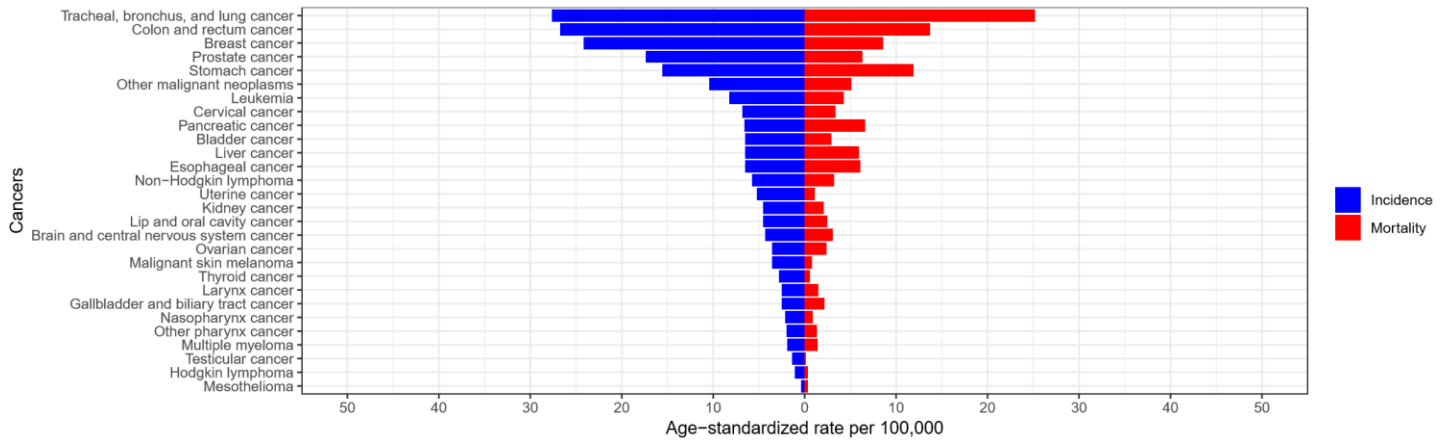

B) Male only

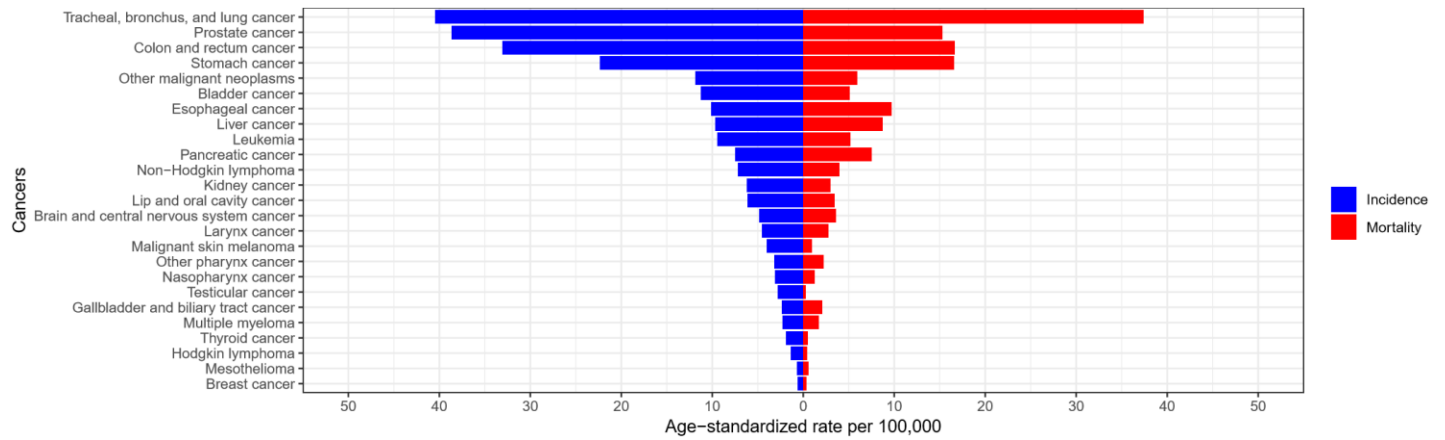

C) Female only

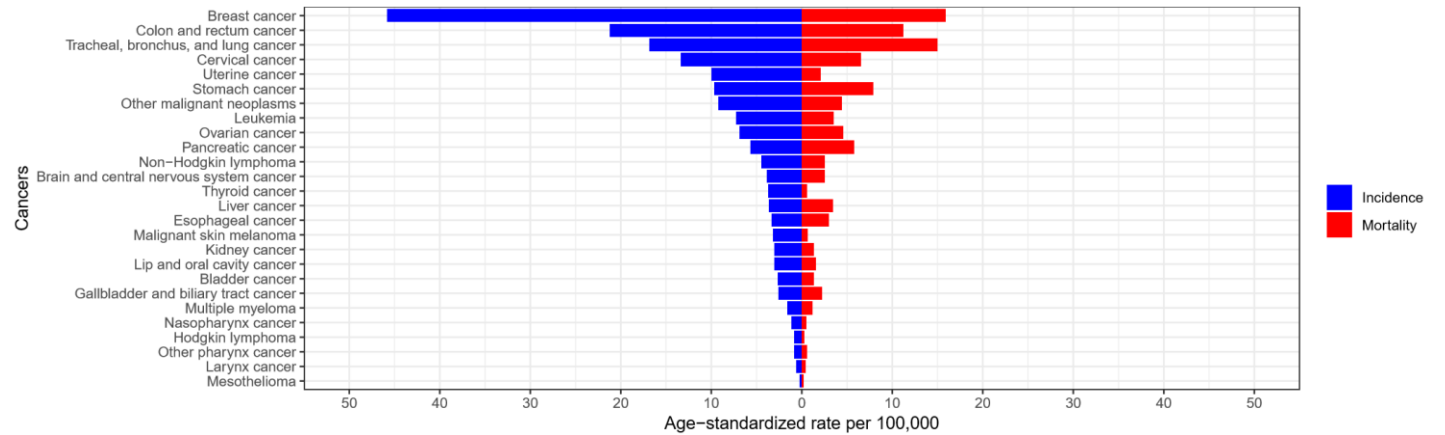

Figure 15: Global age-standardized cancer-specific incidence and mortality rates in 2019, overall and by sex

Footnote: Panels provide the global age-standardized rates per 100,000 of cancer incidence and mortality in 2019, in order of decreasing incidence, for A) both sexes combined, B) males only, and C) females only. Values and associated 95% uncertainty intervals are reported in Table 1.
